# Supplementary material
Source: PubMed Central journal article supplement (PMC5674996)
Supplement: NIHMS915632-supplement-Supporting_Information.pdf [file NIHMS915632-supplement-Supporting_Information.pdf]

Supporting Information

**Contents:**

|                                                                             |             |
|-----------------------------------------------------------------------------|-------------|
| <b>1. General Information.....</b>                                          | <b>S2</b>   |
| <b>2. Reaction Optimization.....</b>                                        | <b>S3</b>   |
| <b>3. Synthesis and Characterization Data for New Allylic Iodides.....</b>  | <b>S6</b>   |
| <b>4. Typical Procedure for Enantioselective [2,3]-Rearrangements...S13</b> |             |
| <b>5. Characterization Data for [2,3]-Rearrangement Products.....</b>       | <b>S14</b>  |
| <b>6. Gram-Scale Experiment.....</b>                                        | <b>S30</b>  |
| <b>7. Transformations of [2,3]-Rearrangement Products.....</b>              | <b>S31</b>  |
| <b>8. Characterization Data for Transformation Products.....</b>            | <b>S34</b>  |
| <b>9. X-Ray Diffraction Analysis of (2<i>R</i>, 3<i>S</i>)-6i.....</b>      | <b>S50</b>  |
| <b>10. References.....</b>                                                  | <b>S55</b>  |
| <b>11. NMR Spectra.....</b>                                                 | <b>S56</b>  |
| <b>12. HPLC Charts.....</b>                                                 | <b>S116</b> |

## 1. General Information

All reactions were carried out in capped reaction vials with magnetic stirring unless otherwise indicated. Commercially obtained reagents were used as received. Solvents were dried by passage through an activated alumina column under Argon. Liquids and solutions were transferred via syringe. All reactions were monitored by thin-layer chromatography with E. Merck silica gel 60 F254 pre-coated plates (0.25 mm). Silica gel (particle size 0.032 - 0.063 mm) purchased from SiliCycle was used for flash chromatography.  $^1\text{H}$  NMR spectra were recorded on Varian Inova-500 spectrometers or Varian Inova-400 spectrometers and  $^{13}\text{C}$  NMR spectra were recorded on Varian Inova-400 spectrometers. Data for  $^1\text{H}$  NMR spectra are reported relative to chloroform as an internal standard (7.26 ppm) or acetonitrile as an internal standard (1.94 ppm) and are reported as follows: chemical shift ( $\delta$  ppm), multiplicity, coupling constant (Hz), and integration. Data for  $^{13}\text{C}$  NMR spectra are reported relative to chloroform as an internal standard (77.0 ppm) or acetonitrile as an internal standard (1.32 ppm) and are reported in terms of chemical shift ( $\delta$  ppm). Melting points were measured on a Fisher Scientific<sup>TM</sup> melting point apparatus (12-144). Optical rotations were measured on a JAS DIP-360 digital polarimeter. Infrared spectra were recorded on a Perkin-Elmer 1000 series FTIR. Chiral HPLC analyses were performed on an Agilent 1200 Series system. APCI-LRMS data were measured using an AB Sciex QTRAP-4500 LC/MS. X-Ray Diffraction data was obtained by Dr. Vincent Lynch at the X-ray Diffraction Lab at University of Texas at Austin.

Allylic iodides **1** were synthesized by procedures reported in the literature.<sup>1</sup> Only unreported allylic iodides **1e**, **1g**, **1i-m**, **1t** and **1v-x** have been fully characterized here.

## 2. Reaction Optimization

*Procedure for Reaction Optimization:* An 8 mL reaction vial was charged with copper salt (0.02 mmol) and chiral ligand (0.024 mmol). The vial was then evacuated and refilled with Argon. After dry CH<sub>2</sub>Cl<sub>2</sub> (4 mL) was added, the mixture was stirred at 25 °C for 2 h. Then the catalyst solution was put into a bath at appropriate temperature, followed by addition of allylic iodide (**1**, 0.4 mmol) and diazo compound **2** (0.42 mmol) in sequence. The mixture was stirred until the reaction was complete (monitored by TLC). The reaction was then concentrated and purified by flash column chromatography on silica gel (Hexane/EtOAc = 20:1) to afford desired rearrangement products as a colorless oil. The regioisomers ratio and diastereoisomers ratio were confirmed by <sup>1</sup>H NMR. The ee values were confirmed by HPLC (when diazo **2a** was utilized, HPLC conditions are Chiralcel OJ-H column (25 cm × 0.46 cm ID), hexane/2-propanol = 90:10, 0.8 mL/min, 220 nm UV detector, *t*<sub>R</sub> = 18.20 min (first diastereoisomer of **3a**), 26.89 min (first diastereoisomer of **3a**), 28.43 min (third diastereoisomer of **3a**), 34.09 min (fourth diastereoisomer of **3a**), 38.70 min (enantiomer of **4a**) and 42.08 min (enantiomer of **4a**); when diazo **2b** was utilized, HPLC conditions are Chiralcel OJ-H column (25 cm × 0.46 cm ID), hexane/2-propanol = 95:5, 0.5 mL/min, 220 nm UV detector, *t*<sub>R</sub> = 8.91 min (first diastereoisomer of **3b**), 9.30 min (second diastereoisomer of **3b**), 19.90 min (third diastereoisomer of **3b**), 21.97 min (fourth diastereoisomer of **3b**), 12.71 min (enantiomer of **4b**) and 14.18 min (enantiomer of **4b**)).

**Table S1.** Reaction optimization: chiral ligands

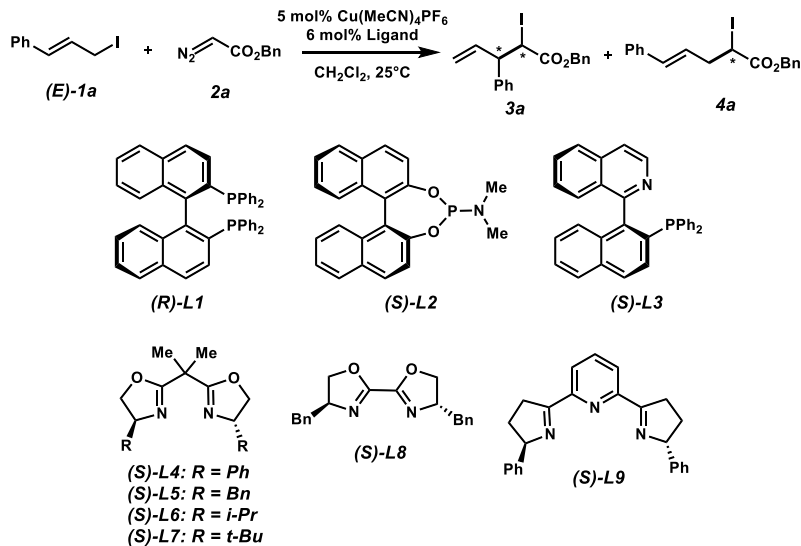

| Entry | Ligand           | Time   | Yield (%) | 3 : 4   | dr of 3 | ee of 3 (% , %) | ee of 4 (%) |
|-------|------------------|--------|-----------|---------|---------|-----------------|-------------|
| 1     | (R)-L1           | 48 h   | 19        | 11 : 89 | 48 : 52 | -- , --         | 0           |
| 2     | (S)-L2 (12 mol%) | 48 h   | 21        | 18 : 82 | 58 : 42 | 69, 31          | 1           |
| 3     | (S)-L3           | 48 h   | 29        | <5 : 95 | -- : -- | -- , --         | 0           |
| 4     | (S)-L4           | 10 min | 62        | 64 : 36 | 34 : 66 | 26, 20          | 5           |
| 5     | (S)-L5           | 10 min | 71        | 58 : 42 | 32 : 68 | 41, 31          | 3           |
| 6     | (S)-L6           | 10 min | 73        | 57 : 43 | 40 : 60 | 22, 24          | 3           |
| 7     | (S)-L7           | 10 min | 82        | 87 : 13 | 45 : 55 | 75, 81          | 30          |
| 8     | (S)-L8           | 10 min | 64        | 65 : 35 | 36 : 64 | 2, 25           | 14          |
| 9     | (S)-L9           | 24 h   | 56        | 56 : 44 | 37 : 63 | 42, 12          | 16          |

**Table S2.** Reaction optimization: copper salt

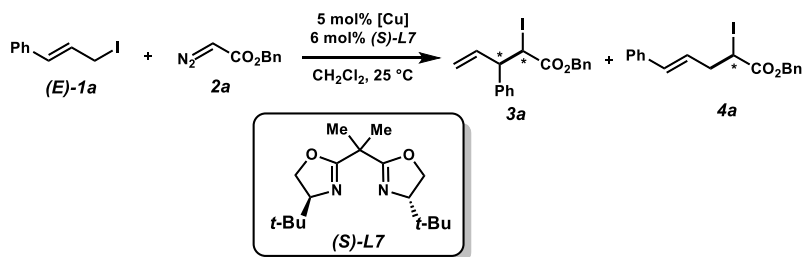

| Entry | [Cu]                                  | Time   | Yield (%) | 3 : 4   | dr of 3 | ee of 3 (% , %) | ee of 4 (%) |
|-------|---------------------------------------|--------|-----------|---------|---------|-----------------|-------------|
| 1     | Cu(MeCN) <sub>4</sub> PF <sub>6</sub> | 10 min | 82        | 87 : 13 | 45 : 55 | 75, 81          | 30          |
| 2     | CuCl                                  | 24 h   | 63        | 60 : 40 | 42 : 58 | 10, 74          | 0           |
| 3     | CuOTf                                 | 10 min | 57        | 74 : 26 | 45 : 55 | 56, 71          | 10          |
| 4     | Cu(OTf) <sub>2</sub>                  | 10 min | 59        | 75 : 25 | 45 : 55 | 59, 71          | 11          |

**Table S3.** Reaction optimization: substrates

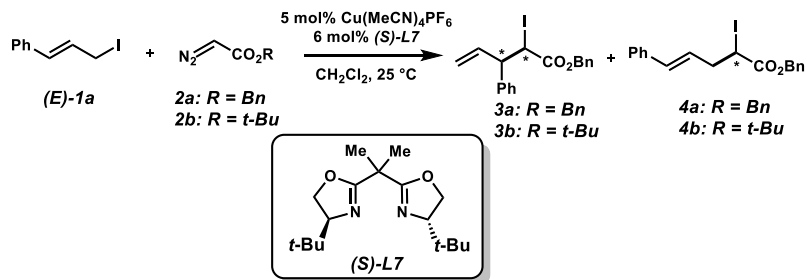

| Entry | Allyl iodide   | Diazo | Time   | Yield (%) | 3 : 4   | dr of 3 | ee of 3 (% , %) | ee of 4 (%) |
|-------|----------------|-------|--------|-----------|---------|---------|-----------------|-------------|
| 1     | <i>(E)</i> -1a | 2a    | 10 min | 82        | 87 : 13 | 45 : 55 | 75, 81          | 30          |
| 2     | <i>(Z)</i> -1a | 2a    | 10 min | 80        | 83 : 17 | 80 : 20 | 73, 70          | 9           |
| 3     | <i>(Z)</i> -1a | 2b    | 5 min  | 85        | 80 : 20 | 91 : 9  | 82, --          | --          |

**Table S4.** Reaction optimization: temperatures

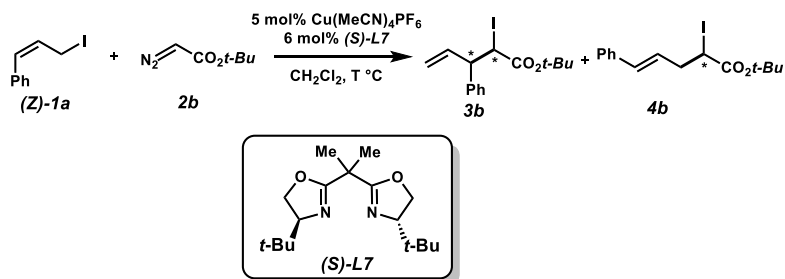

| Entry | T (°C) | Time  | Yield (%) | 3 : 4   | dr of 3 | ee of 3 (% , %) | ee of 4 (%) |
|-------|--------|-------|-----------|---------|---------|-----------------|-------------|
| 1     | 25     | 5 min | 85        | 80 : 20 | 91 : 9  | 82, --          | --          |
| 2     | 0      | 1 h   | 84        | 90 : 10 | 94 : 6  | 90, --          | --          |
| 3     | -20    | 6 h   | 82        | >95 : 5 | >95 : 5 | 96, --          | --          |

### 3. Synthesis and Characterization Data for New Allylic Iodides

#### Typical procedure 3A:

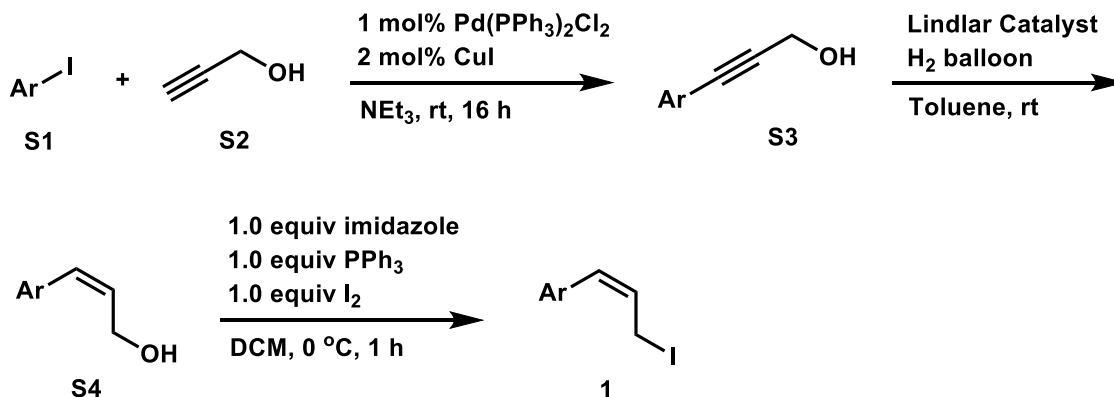

**3-Arylprop-2-yn-1-ol, S3:** A 100 mL flask was charged with Pd(PPh<sub>3</sub>)Cl<sub>2</sub> (70 mg, 0.1 mmol) and CuI (38 mg, 0.2 mmol). After the flask was evacuated and refilled with Argon, NEt<sub>3</sub> (20 mL) was added and the suspension was stirred at room temperature. A solution of **S1** (10 mmol) and propargyl alcohol (**S2**, 616 mg, 11 mmol) in NEt<sub>3</sub> (10 mL) was added to the suspension. After the reaction was complete (monitored by TLC), the mixture was filtered through a plug of Celite, which was then washed with EtOAc (20 mL X 3). The combined solution was concentrated and purified by column chromatography on silica (Hexane/EtOAc = 3:1, v/v) to afford desired product **S3** with 78–95% yield.

**(Z)-3-Arylprop-2-en-1-ol, S4:** A 50 mL flask was charged with 3-arylprop-2-yn-1-ol (**S3**, 5 mmol), Lindlar catalyst (250 mg, Aldrich) and toluene (15 mL). After the flask was evacuated and refilled with H<sub>2</sub> by a balloon, the mixture was vigorously stirred at room temperature. After the reaction was complete (monitored by <sup>1</sup>H NMR), the mixture was filtered through a plug of Celite, which was then washed with EtOAc (20 mL X 3). The combined solution was concentrated to afford desired product **S4** with 88–99% yield.

**(Z)-(3-Iodoprop-1-en-1-yl)arene, 1a–m:** A 100 mL flask was charged with PPh<sub>3</sub> (1.31 g, 5 mmol), imidazole (340 mg, 5 mmol) and dichloromethane (15 mL). To the stirring solution was added iodine (1.25 g, 5 mmol) in portions. After 30 minutes, the flask was wrapped in an aluminum foil and placed in an ice bath, followed by slow addition of (Z)-3-arylprop-2-en-1-ol (**S4**, 5 mmol, in 10 mL DCM). After the reaction was complete (monitored by TLC), the mixture was filtered through a plug of silica, which was then washed with Hexane/EtOAc (v/v = 10:1, 20 mL X 2). The combined solution was concentrated and purified by flash column chromatography on silica (Hexane/EtOAc = 30:1, v/v) to afford desired product **1a–m** with 70–91% yield.

**Typical procedure 3B:**

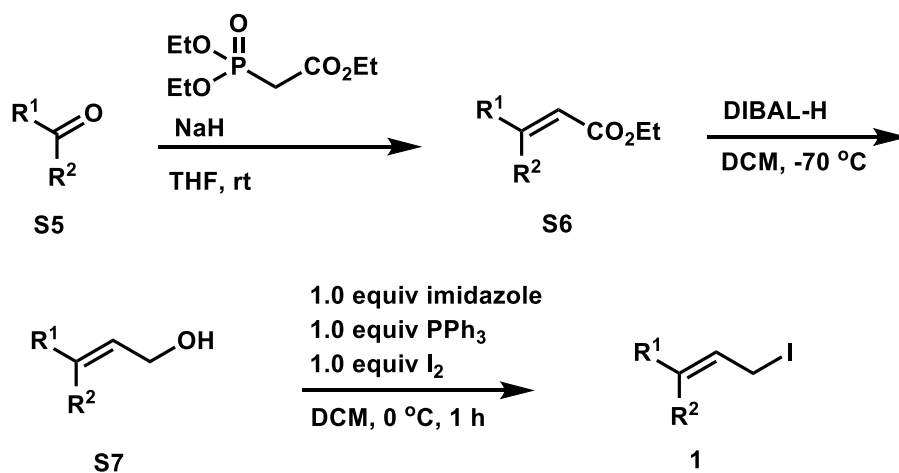

**Ethyl 3,3-di-alkyl-prop-2-enoate, S6<sup>2</sup>:** Triethyl phosphonoacetate (10 mmol) was added to a suspension of NaH (10 mmol) in dry THF (50 mL). After 30 min, ketone (**S5**, 8 mmol) in dry THF (10 mL) was added, and the resulting mixture was stirred overnight, and quenched by the addition of water (50 mL). The organic layer was separated, and the aqueous one was extracted with ether (3 × 50 mL). The combined organic solutions were dried over anhydrous Na<sub>2</sub>SO<sub>4</sub>, concentrated and purified by column chromatography on silica (Hexane/EtOAc = 20:1, v/v) to afford desired product **S6** with 64–88% yield.

**3,3-di-Alkyl-prop-2-en-1-ol, S7:** To a cooled ( $-70\text{ }^{\circ}\text{C}$ ) solution of the unsaturated ester (**S6**, 5 mmol) in THF (50 mL) was added a DIBAL-H (1.2 M in toluene, 10 mL, 12 mmol). After the reduction was complete (monitored by TLC), the reaction was quenched by the addition of sodium sulfate decahydrate (1.6 g, 5 mmol). The suspension was filtered off and washed with EtOAc (30 mL X 3). The solution was concentrated and purified by column chromatography on silica (dry loading, Hexane/EtOAc = 3:1, v/v) to afford desired product **S7** with 86–96% yield.

**1-Iodo-3,3-di-Alkyl-prop-2-ene, 1s–x:** A 100 mL flask was charged with  $\text{PPh}_3$  (1.31 g, 5 mmol), imidazole (340 mg, 5 mmol) and dichloromethane (15 mL). To the stirring solution was added iodine (1.25 g, 5 mmol) in portions. After 30 minutes, the flask was wrapped in an aluminum foil and placed in an ice bath, followed by slow addition of 3,3-di-Alkyl-prop-2-en-1-ol (**S7**, 5 mmol, in 10 mL DCM). After the reaction was complete (monitored by TLC), the mixture was filtered through a plug of silica, which was then washed with Pentane/ $\text{Et}_2\text{O}$  (v/v = 10:1, 50 mL). The combined solution was concentrated to afford desired product **1s–x** with 74–90% yield.

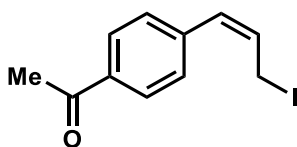

**(Z)-1-(4-(3-iodoprop-1-en-1-yl)phenyl)ethan-1-one, 1e:** A light yellow oil, TLC  $R_f$  = 0.40 (Hexane/EtOAc = 6:1, v/v), 76% yield,  $^1\text{H}$  NMR (400 MHz,  $\text{CDCl}_3$ ):  $\delta$  7.97 (d,  $J$  = 8.0 Hz, 2H, ArH), 7.43 (d,  $J$  = 8.4 Hz, 2H, ArH), 6.44 (d,  $J$  = 11.2 Hz, 1H, ArCH=), 6.10 (dt,  $J_1$  = 11.2 Hz and  $J_2$  = 9.2 Hz, 1H, =CHCH<sub>2</sub>), 4.04 (d,  $J$  = 9.2 Hz, 2H, CH<sub>2</sub>I), 2.60 (s, 3H, CH<sub>3</sub>);  $^{13}\text{C}$  NMR (100 MHz,  $\text{CDCl}_3$ ):  $\delta$  197.4 (1C, C=O), 140.4 (1C, ArC), 135.7 (1C, ArC), 130.5 (1C, ArCH=), 130.3 (1C, =CHCH<sub>2</sub>), 128.6 (2C, ArC), 128.5 (2C, ArC), 26.6 (1C, CH<sub>3</sub>), 1.6 (1C, CH<sub>2</sub>I). IR (neat): 3018, 2967, 1681, 1356, 1267, 1150, 957, 868, 837



cm<sup>-1</sup>. APCI-MS calcd for [C<sub>11</sub>H<sub>12</sub>OI, M + H]<sup>+</sup>: 286.99, Found 287.00.

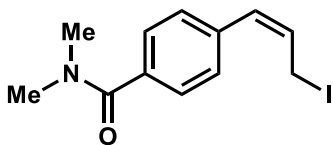

**(Z)-4-(3-Iodoprop-1-en-1-yl)-N,N-dimethylbenzamide, 1g:** A light yellow oil, TLC R<sub>f</sub> = 0.45 (Hexane/EtOAc = 1:2, v/v), 70% yield, <sup>1</sup>H NMR (500 MHz, CDCl<sub>3</sub>): δ 7.45 (d, *J* = 8.0 Hz, 2H, ArH), 7.38 (d, *J* = 8.0 Hz, 2H, ArH), 6.43 (d, *J* = 11.5 Hz, 1H, ArCH=), 6.14–5.98 (m, 1H, =CHCH<sub>2</sub>), 4.06 (d, *J* = 9.5 Hz, 2H, CH<sub>2</sub>I), 3.12 (s, 3H, CH<sub>3</sub>), 3.01 (s, 3H, CH<sub>3</sub>); <sup>13</sup>C NMR (100 MHz, CDCl<sub>3</sub>): δ 171.2 (1C, C=O), 137.0 (1C, ArC), 135.2 (1C, ArC), 130.9 (1C, ArCH=), 129.4 (1C, =CHCH<sub>2</sub>), 128.4 (2C, ArC), 127.4 (2C, ArC), 39.6 (1C, CH<sub>3</sub>), 35.4 (1C, CH<sub>3</sub>), 2.0 (1C, CH<sub>2</sub>I). IR (neat): 2927, 1631, 1392, 1080, 847, 779 cm<sup>-1</sup>. APCI-MS calcd for [C<sub>12</sub>H<sub>15</sub>INO, M + H]<sup>+</sup>: 316.02, Found 316.02.

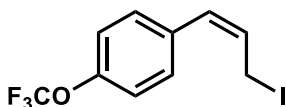

**(Z)-1-(3-iodoprop-1-en-1-yl)-4-(trifluoromethoxy)benzene, 1i:** A light yellow oil, TLC R<sub>f</sub> = 0.65 (Hexane/EtOAc = 100:0, v/v), 86% yield, <sup>1</sup>H NMR (500 MHz, CDCl<sub>3</sub>): δ 7.39 (d, *J* = 8.5 Hz, 2H, ArH), 7.25 (d, *J* = 8.0 Hz, 2H, ArH), 6.41 (d, *J* = 11.5 Hz, 1H, ArCH=), 6.06 (dt, *J*<sub>1</sub> = 11.5 Hz and *J*<sub>2</sub> = 9.0 Hz, 1H, =CHCH<sub>2</sub>), 4.05 (dd, *J*<sub>1</sub> = 9.5 Hz and *J*<sub>2</sub> = 0.5 Hz, 2H, CH<sub>2</sub>I); <sup>13</sup>C NMR (100 MHz, CDCl<sub>3</sub>): δ 148.2 (q, *J* = 2.0 Hz, 1C, ArC), 134.4 (1C, ArC), 130.3 (1C, ArCH=), 129.9 (2C, ArC), 129.3 (1C, =CHCH<sub>2</sub>), 121.0 (2C, ArC), 120.4 (q, *J* = 256 Hz, 1C, CF<sub>3</sub>), 1.8 (1C, CH<sub>2</sub>I). IR (neat): 3022, 1507, 1262, 1210, 1165, 867, 844, 758 cm<sup>-1</sup>. APCI-MS calcd for [C<sub>10</sub>H<sub>9</sub>F<sub>3</sub>IO, M + H]<sup>+</sup>: 328.96, Found 328.97.

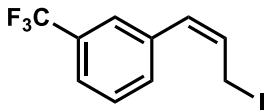

**(Z)-1-(3-Iodoprop-1-en-1-yl)-3-(trifluoromethyl)benzene, 1j:** A light yellow oil, TLC  $R_f = 0.75$  (Hexane/EtOAc = 30:1, v/v), 91% yield,  $^1\text{H NMR}$  (500 MHz,  $\text{CDCl}_3$ ):  $\delta$  7.62–7.50 (m, 4H, ArH), 6.45 (d,  $J = 11.5$  Hz, 1H, ArCH=), 6.12 (dt,  $J_1 = 11.5$  Hz and  $J_2 = 9.0$  Hz, 1H, =CHCH<sub>2</sub>), 4.03 (dd,  $J_1 = 9.0$  Hz and  $J_2 = 1.0$  Hz, 2H, CH<sub>2</sub>I);  $^{13}\text{C NMR}$  (100 MHz,  $\text{CDCl}_3$ ):  $\delta$  136.4 (1C, ArC), 131.4 (1C, ArC), 131.0 (q,  $J = 32.1$  Hz, 1C, ArC), 130.2 (1C, ArCH=), 130.1 (1C, ArC), 129.0 (1C, =CHCH<sub>2</sub>), 125.3 (q,  $J = 3.8$  Hz, 1C, ArC), 124.0 (q,  $J = 271$  Hz, 1C, CF<sub>3</sub>), 124.1 (q,  $J = 3.8$  Hz, 1C, ArC), 1.1 (1C, CH<sub>2</sub>I). IR (neat): 3022, 1330, 1166, 1126, 1074, 907, 808, 703  $\text{cm}^{-1}$ . APCI-MS calcd for  $[\text{C}_{10}\text{H}_9\text{F}_3\text{I}, \text{M} + \text{H}]^+$ : 312.97, Found 312.99.

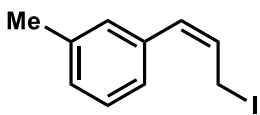

**(Z)-1-(3-Iodoprop-1-en-1-yl)-3-methylbenzene, 1k:** A light yellow oil, TLC  $R_f = 0.70$  (Hexane/EtOAc = 100:0, v/v), 86% yield,  $^1\text{H NMR}$  (500 MHz,  $\text{CDCl}_3$ ):  $\delta$  7.30 (t,  $J = 7.5$  Hz, 1H, ArH), 7.21–7.14 (m, 2H, ArH), 7.11 (d,  $J = 7.5$  Hz, 1H, ArH), 6.42 (d,  $J = 11.0$  Hz, 1H, ArCH=), 6.00 (dt,  $J_1 = 11.0$  Hz and  $J_2 = 9.0$  Hz, 1H, =CHCH<sub>2</sub>), 4.11 (d,  $J = 9.0$  Hz, 2H, CH<sub>2</sub>I), 2.39 (s, 3H, CH<sub>3</sub>);  $^{13}\text{C NMR}$  (100 MHz,  $\text{CDCl}_3$ ):  $\delta$  138.1 (1C, ArC), 135.7 (1C, ArC), 132.0 (1C, ArCH=), 129.3 (1C, =CHCH<sub>2</sub>), 128.4 (1C, ArC), 128.3 (1C, ArC), 128.2 (1C, ArC), 125.5 (1C, ArC), 21.5 (1C, CH<sub>3</sub>), 2.9 (1C, CH<sub>2</sub>I). IR (neat): 3016, 2918, 1602, 1487, 1149, 913, 798, 755, 699  $\text{cm}^{-1}$ . APCI-MS calcd for  $[\text{C}_{10}\text{H}_{12}\text{I}, \text{M} + \text{H}]^+$ : 259.00, Found 259.00.

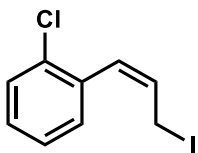

**(Z)-1-Chloro-2-(3-iodoprop-1-en-1-yl)benzene, 1l:** A light yellow oil, TLC  $R_f = 0.65$

(Hexane/EtOAc = 100:0, v/v), 82% yield,  $^1\text{H}$  NMR (500 MHz,  $\text{CDCl}_3$ ):  $\delta$  7.53–7.48 (m, 1H, ArH), 7.45–7.39 (m, 1H, ArH), 7.33 (t,  $J = 7.5$  Hz, 1H, ArH), 7.28–7.22 (m, 1H, ArH), 6.53 (d,  $J = 11.0$  Hz, 1H, ArCH=), 6.14 (dt,  $J_1 = 11.5$  Hz and  $J_2 = 9.0$  Hz, 1H, =CHCH<sub>2</sub>), 3.97 (d,  $J = 9.0$  Hz, 2H, CH<sub>2</sub>I);  $^{13}\text{C}$  NMR (100 MHz,  $\text{CDCl}_3$ ):  $\delta$  133.9 (1C, ArC), 129.7 (1C, ArC), 129.6 (1C, ArCH=), 129.0 (1C, =CHCH<sub>2</sub>), 128.9 (1C, ArC), 128.8 (2C, ArC), 126.6 (1C, ArC), 1.8 (1C, CH<sub>2</sub>I). IR (neat): 3023, 1589, 1469, 1435, 1147, 1050, 1036, 810, 746, 730  $\text{cm}^{-1}$ . APCI-MS calcd for  $[\text{C}_9\text{H}_9\text{ClI}, \text{M} + \text{H}]^+$ : 278.94, Found 278.95.

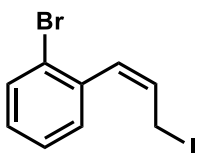

**(Z)-1-Bromo-2-(3-iodoprop-1-en-1-yl)benzene, 1m:** A light yellow oil, TLC  $R_f = 0.55$  (Hexane/EtOAc = 100:0, v/v), 78% yield,  $^1\text{H}$  NMR (500 MHz,  $\text{CDCl}_3$ ):  $\delta$  7.61 (dd,  $J_1 = 8.0$  Hz and  $J_2 = 1.0$  Hz, 1H, ArH), 7.49 (dd,  $J_1 = 8.0$  Hz and  $J_2 = 1.0$  Hz, 1H, ArH), 7.37 (td,  $J_1 = 7.5$  Hz and  $J_2 = 0.5$  Hz, 1H, ArH), 7.17 (td,  $J_1 = 8.0$  Hz and  $J_2 = 2.0$  Hz, 1H, ArH), 6.47 (d,  $J = 11.0$  Hz, 1H, ArCH=), 6.12 (dt,  $J_1 = 11.0$  Hz and  $J_2 = 9.0$  Hz, 1H, =CHCH<sub>2</sub>), 3.95 (dd,  $J_1 = 9.0$  Hz and  $J_2 = 1.0$  Hz, 2H, CH<sub>2</sub>I);  $^{13}\text{C}$  NMR (100 MHz,  $\text{CDCl}_3$ ):  $\delta$  135.7 (1C, ArC), 132.9 (1C, ArCH=), 131.0 (1C, =CHCH<sub>2</sub>), 129.4 (1C, ArC), 129.0 (2C, ArC), 127.2 (1C, ArC), 124.2 (1C, ArC), 1.7 (1C, CH<sub>2</sub>I). IR (neat): 3052, 3021, 1589, 1466, 1433, 1148, 1025, 808, 765, 746, 723, 666  $\text{cm}^{-1}$ . APCI-MS calcd for  $[\text{C}_9\text{H}_9\text{BrI}, \text{M} + \text{H}]^+$ : 322.89, Found 322.88.

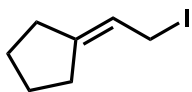

**(2-Iodoethylidene)cyclopentane, 1t:** A yellow oil, TLC  $R_f = 0.60$  (Hexane/EtOAc = 100:0, v/v), 74% yield,  $^1\text{H}$  NMR (500 MHz,  $\text{CDCl}_3$ ):  $\delta$  5.67–5.57 (m, 1H, =CH), 3.93 (d,  $J = 9.0$  Hz, 2H, CH<sub>2</sub>I), 2.26 (t,  $J = 7.5$  Hz, 2H, CH<sub>2</sub>), 2.20 (t,  $J = 7.5$  Hz, 2H, CH<sub>2</sub>), 1.76–

1.68 (m, 2H, CH<sub>2</sub>), 1.65–1.58 (m, 2H, CH<sub>2</sub>); <sup>13</sup>C NMR (100 MHz, CDCl<sub>3</sub>): δ 151.1 (1C, =C), 117.6 (1C, =CH), 34.1 (1C, CH<sub>2</sub>), 28.3 (1C, CH<sub>2</sub>), 26.2 (1C, CH<sub>2</sub>), 26.0 (1C, CH<sub>2</sub>), 6.2 (1C, CH<sub>2</sub>I). IR (neat): 2956, 2867, 1657, 1429, 1142, 854, 668 cm<sup>-1</sup>. APCI-MS calcd for [C<sub>7</sub>H<sub>12</sub>I, M + H]<sup>+</sup>: 223.00, Found 223.00.

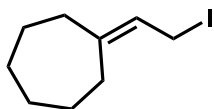

**(2-Iodoethylidene)cycloheptane, 1v:** A light yellow oil, TLC R<sub>f</sub> = 0.80 (Hexane/EtOAc = 100:0, v/v), 90% yield, <sup>1</sup>H NMR (500 MHz, CDCl<sub>3</sub>): δ 5.53 (t, *J* = 9.0 Hz, 1H, CH=), 3.93 (d, *J* = 8.5 Hz, 2H, CH<sub>2</sub>I), 2.28 (t, *J* = 6.0 Hz, 1H, CH<sub>2</sub>), 2.20 (t, *J* = 6.0 Hz, 1H, CH<sub>2</sub>), 1.68–1.61 (m, 2H, CH<sub>2</sub>), 1.57–1.46 (m, 6H, 3CH<sub>2</sub>); <sup>13</sup>C NMR (100 MHz, CDCl<sub>3</sub>): δ 148.7 (1C, C=), 122.0 (1C, =CH), 37.8 (1C, CH<sub>2</sub>), 29.8 (1C, CH<sub>2</sub>), 29.6 (1C, CH<sub>2</sub>), 29.1 (1C, CH<sub>2</sub>), 28.6 (1C, CH<sub>2</sub>), 26.0 (1C, CH<sub>2</sub>), 4.4 (1C, CH<sub>2</sub>I). IR (neat): 2923, 2850, 1632, 1451, 1441, 1142, 955, 833 cm<sup>-1</sup>. APCI-MS calcd for [C<sub>9</sub>H<sub>16</sub>I<sub>3</sub>, M + H]<sup>+</sup>: 251.03, Found 251.03.

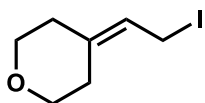

**4-(2-Iodoethylidene)tetrahydro-2H-pyran, 1w:** A light yellow oil, TLC R<sub>f</sub> = 0.40 (Hexane/EtOAc = 10:1, v/v), 82% yield, <sup>1</sup>H NMR (400 MHz, CDCl<sub>3</sub>): δ 5.58 (t, *J* = 9.2 Hz, 1H, =CH), 3.91 (d, *J* = 8.4 Hz, 2H, CH<sub>2</sub>I), 3.70–3.62 (m, 4H, 2CH<sub>2</sub>O), 2.31–2.25 (m, 2H, CH<sub>2</sub>), 2.24–2.18 (m, 2H, CH<sub>2</sub>); <sup>13</sup>C NMR (100 MHz, CDCl<sub>3</sub>): δ 140.5 (1C, C=), 120.6 (1C, =CH), 68.9 (1C, CH<sub>2</sub>O), 67.6 (1C, CH<sub>2</sub>O), 36.6 (1C, CH<sub>2</sub>), 29.3 (1C, CH<sub>2</sub>), 1.3 (1C, CH<sub>2</sub>I). IR (neat): 2958, 2846, 1656, 1230, 1146, 1098, 986, 852, 831, 660 cm<sup>-1</sup>. APCI-MS calcd for [C<sub>7</sub>H<sub>12</sub>IO, M + H]<sup>+</sup>: 238.99, Found 238.99.

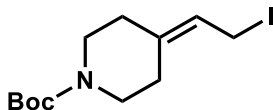

**tert-Butyl 4-(2-iodoethylidene)piperidine-1-carboxylate, 1x:** A light yellow oil, TLC  $R_f = 0.40$  (Hexane/EtOAc = 4:1, v/v), 82% yield,  $^1\text{H NMR}$  (400 MHz,  $\text{CDCl}_3$ ):  $\delta$  5.62 (t,  $J = 8.5$  Hz, 1H, =CH), 3.91 (d,  $J = 8.5$  Hz, 2H,  $\text{CH}_2\text{I}$ ), 3.48–3.36 (m, 4H,  $2\text{CH}_2\text{N}$ ), 2.28–2.12 (m, 4H,  $2\text{CH}_2$ ), 1.46 (s, 9H,  $\text{C}(\text{CH}_3)_3$ );  $^{13}\text{C NMR}$  (100 MHz,  $\text{CDCl}_3$ ):  $\delta$  154.6 (1C,  $\text{C}=\text{O}$ ), 141.3 (1C,  $\text{C}=\text{C}$ ), 121.3 (1C, =CH), 79.7 (1C,  $\text{OC}(\text{CH}_3)_3$ ), 35.6 (2C,  $2\text{CH}_2\text{N}$ ), 28.4 (3C,  $\text{OC}(\text{CH}_3)_3$ ), 28.0 (2C,  $2\text{CH}_2$ ), 1.2 (1C,  $\text{CH}_2\text{I}$ ). IR (neat): 2975, 2935, 1694, 1422, 1365, 1234, 1169, 1117, 984, 864, 769  $\text{cm}^{-1}$ . APCI-MS calcd for  $[\text{C}_{12}\text{H}_{21}\text{INO}_2, \text{M} + \text{H}]^+$ : 338.06, Found 338.06.

#### 4. Typical Procedure for Enantioselective [2,3]-Rearrangements

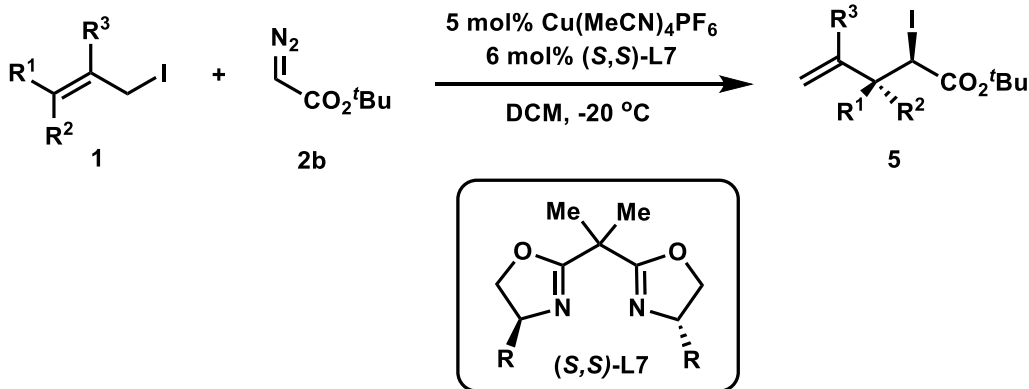

An 8 mL reaction vial was charged with  $[\text{Cu}(\text{MeCN})_4]\text{PF}_6$  (7.4 mg, 0.02 mmol) and  $(S,S)\text{-L7}$  (7.2 mg, 0.024 mmol). The vial was then evacuated and refilled with Argon. After dry  $\text{CH}_2\text{Cl}_2$  (4 mL) was added, the mixture was stirred at 23  $^\circ\text{C}$  for 2 h. Then the catalyst solution was cooled to  $-20$   $^\circ\text{C}$ , followed by addition of allylic iodide (**1**, 0.4 mmol) and **2b** (0.42 mmol) in sequence. The mixture was stirred at  $-20$   $^\circ\text{C}$  until the reaction was complete (monitored by TLC, about 6 h). The reaction was then

concentrated and purified by flash column chromatography on silica gel (Hexane/EtOAc = 30:1) to afford [2,3]-rearrangement products.

## 5. Characterization Data for [2,3]-Rearrangement Products

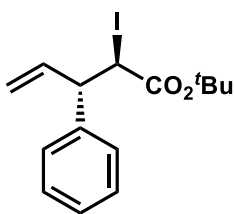

**(+)-*tert*-Butyl (2*R*, 3*S*)-2-iodo-3-phenylpent-4-enoate, 5a:** Colorless semi-oil, TLC  $R_f$  = 0.58 (Hexane/EtOAc = 30:1, v/v), 82% yield, regioisomers ratio > 95:5, *anti* / *syn* > 95 : 5, 96% ee. HPLC conditions: Chiralcel OJ-H column (25 cm × 0.46 cm ID), hexane/2-propanol = 95:5, 0.5 mL/min, 220 nm UV detector,  $t_R$  = 8.91 min (minor) and  $t_R$  = 9.30 min (major).  $[\alpha]_D^{23}$  +31.0 ( $c$  0.40, CH<sub>2</sub>Cl<sub>2</sub>). <sup>1</sup>H NMR (500 MHz, CDCl<sub>3</sub>):  $\delta$  7.32–7.27 (m, 2H, ArH), 7.24–7.20 (m, 1H, ArH), 7.20–7.16 (m, 2H, ArH), 6.02–5.92 (m, 1H, =CH), 5.18 (d,  $J$  = 10.5 Hz, 1H, 1/2(=CH<sub>2</sub>)), 5.12 (d,  $J$  = 17.0 Hz, 1H, 1/2(=CH<sub>2</sub>)), 4.48 (d,  $J$  = 11.5 Hz, 1H, CHI), 3.84 (dd,  $J_1$  = 11.5 Hz and  $J_2$  = 8.5 Hz, 1H, ArCH), 1.19 (s, 9H, C(CH<sub>3</sub>)<sub>3</sub>); <sup>13</sup>C NMR (100 MHz, CDCl<sub>3</sub>):  $\delta$  168.9 (1C, C=O), 139.6 (1C, ArC), 139.0 (1C, =CH), 128.6 (2C, ArC), 127.9 (2C, ArC), 127.3 (1C, ArC), 117.8 (1C, =CH<sub>2</sub>), 81.9 (1C, OC(CH<sub>3</sub>)<sub>3</sub>), 54.6 (1C, ArCH), 29.1 (1C, CHI), 27.2 (3C, OC(CH<sub>3</sub>)<sub>3</sub>). IR (neat): 2977, 1728, 1368, 1272, 1155, 918, 847, 699 cm<sup>-1</sup>. APCI-MS calcd for [C<sub>15</sub>H<sub>20</sub>IO<sub>2</sub>, M + H]<sup>+</sup>: 359.05, Found 359.05.

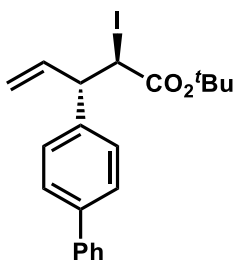

**(+)-tert-Butyl (2R, 3S)-3-([1,1'-biphenyl]-4-yl)-2-iodopent-4-enoate, 5b:** Colorless semi-oil, TLC  $R_f = 0.40$  (Hexane/EtOAc = 30:1, v/v), 78% yield, regioisomers ratio > 95:5, *anti* / *syn* = 88 : 12, 95% ee. HPLC conditions: Chiralcel OJ-H column (25 cm  $\times$  0.46 cm ID), hexane/2-propanol = 95:5, 0.5 mL/min, 254 nm UV detector,  $t_R = 13.71$  min (major) and  $t_R = 16.82$  min (minor).  $[\alpha]_D^{23} +32.0$  ( $c$  0.40,  $\text{CH}_2\text{Cl}_2$ ).  $^1\text{H}$  NMR (500 MHz,  $\text{CDCl}_3$ ):  $\delta$  7.58–7.50 (m, 4H, ArH), 7.46–7.40 (m, 2H, ArH), 7.37–7.32 (m, 1H, ArH), 7.27 (d,  $J = 8.5$  Hz, 2H, ArH), 6.06–5.94 (m, 1H, =CH), 5.22 (d,  $J = 10.0$  Hz, 1H, 1/2(=CH<sub>2</sub>)), 5.17 (d,  $J = 16.5$  Hz, 1H, 1/2(=CH<sub>2</sub>)), 4.51 (d,  $J = 11.5$  Hz, 1H, CHI), 3.90 (dd,  $J_1 = 11.5$  Hz and  $J_2 = 8.5$  Hz, 1H, ArCH), 1.21 (s, 9H, C(CH<sub>3</sub>)<sub>3</sub>);  $^{13}\text{C}$  NMR (100 MHz,  $\text{CDCl}_3$ ):  $\delta$  169.0 (1C, C=O), 140.6 (1C, ArC), 140.2 (1C, ArC), 138.9 (1C, =CH), 138.7 (1C, ArC), 128.8 (2C, ArC), 128.3 (2C, ArC), 127.3 (1C, ArC), 127.2 (2C, ArC), 127.0 (2C, ArC), 117.9 (1C, =CH<sub>2</sub>), 82.0 (1C, OC(CH<sub>3</sub>)<sub>3</sub>), 54.2 (1C, ArCH), 29.0 (1C, CHI), 27.3 (3C, OC(CH<sub>3</sub>)<sub>3</sub>). IR (neat): 2977, 2928, 1728, 1486, 1368, 1272, 1156, 919, 840, 763, 697  $\text{cm}^{-1}$ . APCI-MS calcd for  $[\text{C}_{21}\text{H}_{24}\text{IO}_2, \text{M} + \text{H}]^+$ : 435.08, Found 435.08.

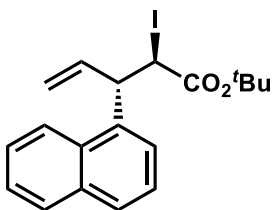

**(+)-tert-Butyl (2R, 3S)-2-iodo-3-(naphthalen-1-yl)pent-4-enoate, 5c:** Colorless semi-oil, TLC  $R_f = 0.50$  (Hexane/EtOAc = 30:1, v/v), 93% yield, regioisomers ratio > 95:5, *anti* / *syn* > 95 : 5, 90% ee (ee value was determined by derivatization to compound **6c**).  $[\alpha]_D^{24} +7.2$  ( $c$  0.50,  $\text{CH}_2\text{Cl}_2$ ).  $^1\text{H}$  NMR (500 MHz,  $\text{CD}_3\text{CN}$ ):  $\delta$  8.26 (d,  $J = 8.5$  Hz, 1H,

ArH), 7.92 (d,  $J = 8.5$  Hz, 1H, ArH), 7.81 (d,  $J = 7.5$  Hz, 1H, ArH), 7.62–7.52 (m, 2H, ArH), 7.52–7.45 (m, 2H, ArH), 6.11–6.00 (m, 1H, =CH), 5.27–5.21 (m, 1H, 1/2(=CH<sub>2</sub>)), 5.18–5.13 (m, 1H, 1/2(=CH<sub>2</sub>)), 4.93 (d,  $J = 11.5$  Hz, 1H, CHI), 4.75 (dd,  $J_1 = 11.5$  Hz and  $J_2 = 9.0$  Hz, 1H, ArCH), 0.95 (s, 9H, C(CH<sub>3</sub>)<sub>3</sub>); <sup>13</sup>C NMR (100 MHz, CD<sub>3</sub>CN):  $\delta$  170.0 (1C, C=O), 140.0 (1C, =CH), 137.9 (1C, ArC), 134.9 (1C, ArC), 131.9 (1C, ArC), 129.7 (1C, ArC), 128.6 (1C, ArC), 127.3 (1C, ArC), 126.9 (1C, ArC), 126.3 (1C, ArC), 124.8 (1C, ArC), 124.4 (1C, ArC), 118.2 (1C, =CH<sub>2</sub>), 82.3 (1C, OC(CH<sub>3</sub>)<sub>3</sub>), 49.9 (1C, ArCH), 30.2 (1C, CHI), 27.2 (3C, OC(CH<sub>3</sub>)<sub>3</sub>). IR (neat): 2978, 2931, 1726, 1368, 1278, 1156, 920, 842, 779 cm<sup>-1</sup>. APCI-MS calcd for [C<sub>19</sub>H<sub>22</sub>IO<sub>2</sub>, M + H]<sup>+</sup>: 409.07, Found 409.07.

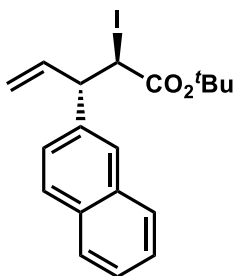

**(+)-tert-Butyl (2R, 3S)-2-iodo-3-(naphthalen-2-yl)pent-4-enoate, 5d:** Colorless semi-oil, TLC R<sub>f</sub> = 0.55 (Hexane/EtOAc = 30:1, v/v), 77% yield, regioisomers ratio > 95:5, *anti* / *syn* = 93 : 7, 96% ee (ee value was determined by derivatization to compound **6d**). [ $\alpha$ ]<sub>D</sub><sup>24</sup> +45.0 (*c* 0.60, CH<sub>2</sub>Cl<sub>2</sub>). <sup>1</sup>H NMR (500 MHz, CDCl<sub>3</sub>):  $\delta$  7.82–7.76 (m, 3H, ArH), 7.66 (s, 1H, ArH), 7.49–7.43 (m, 2H, ArH), 7.33 (dd,  $J_1 = 8.5$  Hz and  $J_2 = 1.5$  Hz, 1H, ArH), 6.12–6.02 (m, 1H, =CH), 5.23 (d,  $J = 10.0$  Hz, 1H, 1/2(=CH<sub>2</sub>)), 5.17 (d,  $J = 17.0$  Hz, 1H, 1/2(=CH<sub>2</sub>)), 4.62 (d,  $J = 11.5$  Hz, 1H, CHI), 4.04 (dd,  $J_1 = 11.5$  Hz and  $J_2 = 8.5$  Hz, 1H, ArCH), 1.14 (s, 9H, C(CH<sub>3</sub>)<sub>3</sub>); <sup>13</sup>C NMR (100 MHz, CDCl<sub>3</sub>):  $\delta$  168.9 (1C, CO<sub>2</sub>C(CH<sub>3</sub>)<sub>3</sub>), 139.0 (1C, CH=), 137.1 (1C, ArC), 133.3 (1C, ArC), 132.5 (1C, ArC), 128.3 (1C, ArC), 127.7 (1C, ArC), 127.6 (1C, ArC), 126.7 (1C, ArC), 126.2 (1C, ArC), 125.9 (1C, ArC), 125.8 (1C, ArC), 118.0 (1C, =CH<sub>2</sub>), 81.9 (1C, OC(CH<sub>3</sub>)<sub>3</sub>), 54.4 (1C, ArCH), 29.1 (1C, CHI), 27.2 (3C, OC(CH<sub>3</sub>)<sub>3</sub>). IR (neat): 2978, 2932, 1728, 1369, 1276, 1155, 922, 843, 818, 745, 616 cm<sup>-1</sup>. APCI-MS calcd for [C<sub>19</sub>H<sub>22</sub>IO<sub>2</sub>, M + H]<sup>+</sup>: 409.07,



Found 409.07.

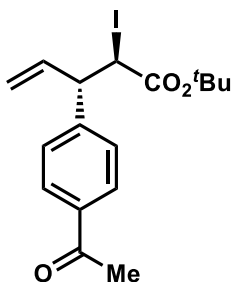

**(+)-tert-Butyl (2R, 3S)-3-(4-acetylphenyl)-2-iodopent-4-enoate, 5e:** Colorless semi-oil, TLC  $R_f = 0.40$  (Hexane/EtOAc = 1:1, v/v), 75% yield, regioisomers ratio > 95:5, *anti* / *syn* = 92 : 8, 96% ee. HPLC conditions: Chiralcel AD-H column (25 cm  $\times$  0.46 cm ID), hexane/2-propanol = 95:5, 0.5 mL/min, 254 nm UV detector,  $t_R = 16.70$  min (major) and  $t_R = 21.45$  min (minor).  $[\alpha]_D^{25} +34.0$  ( $c$  0.60,  $\text{CH}_2\text{Cl}_2$ ).  $^1\text{H NMR}$  (500 MHz,  $\text{CDCl}_3$ ):  $\delta$  7.90 (d,  $J = 8.0$  Hz, 2H, ArH), 7.30 (d,  $J = 8.0$  Hz, 2H, ArH), 6.00–5.87 (m, 1H, =CH), 5.21 (d,  $J = 10.0$  Hz, 1H, 1/2(=CH<sub>2</sub>)), 5.12 (d,  $J = 17.0$  Hz, 1H, 1/2(=CH<sub>2</sub>)), 4.50 (d,  $J = 11.5$  Hz, 1H, CHI), 3.92 (dd,  $J_1 = 11.5$  Hz and  $J_2 = 9.0$  Hz, 1H, ArCH), 2.58 (s, 3H, COCH<sub>3</sub>), 1.20 (s, 9H, C(CH<sub>3</sub>)<sub>3</sub>).  $^{13}\text{C NMR}$  (100 MHz,  $\text{CDCl}_3$ ):  $\delta$  197.6 (1C, COCH<sub>3</sub>), 168.8 (1C, CO<sub>2</sub>C(CH<sub>3</sub>)<sub>3</sub>), 145.2 (1C, ArC), 138.3 (1C, =CH), 136.1 (1C, ArC), 128.7 (2C, ArC), 128.1 (2C, ArC), 118.5 (1C, =CH<sub>2</sub>), 82.2 (1C, OC(CH<sub>3</sub>)<sub>3</sub>), 54.4 (1C, ArCH), 28.1 (1C, CHI), 27.3 (3C, OC(CH<sub>3</sub>)<sub>3</sub>), 26.6 (1C, COCH<sub>3</sub>). IR (neat): 2978, 2928, 1727, 1684, 1368, 1268, 1157, 958, 839  $\text{cm}^{-1}$ . APCI-MS calcd for  $[\text{C}_{17}\text{H}_{22}\text{IO}_3, \text{M} + \text{H}]^+$ : 401.06, Found 401.06.

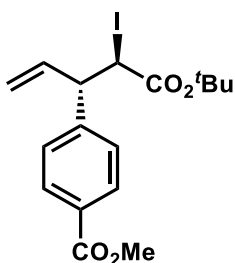

**(+)-Methyl 4-((3S, 4R)-5-(tert-butoxy)-4-iodo-5-oxopent-1-en-3-yl)benzoate, 5f:**

Colorless semi-oil, TLC  $R_f = 0.40$  (Hexane/EtOAc = 10:1, v/v), 75% yield, regioisomers ratio = 93:7, *anti* / *syn* = 94 : 6, 93% ee. HPLC conditions: Chiralcel OJ-H column (25 cm  $\times$  0.46 cm ID), hexane/2-propanol = 97:3, 0.5 mL/min, 220 nm UV detector,  $t_R = 15.41$  min (major) and  $t_R = 16.77$  min (minor).  $[\alpha]_D^{23} +18.7$  ( $c$  0.60,  $\text{CH}_2\text{Cl}_2$ ).  $^1\text{H}$  NMR (500 MHz,  $\text{CDCl}_3$ ):  $\delta$  7.98 (d,  $J = 8.5$  Hz, 2H, ArH), 7.27 (d,  $J = 8.5$  Hz, 2H, ArH), 6.00–5.90 (m, 1H, =CH), 5.21 (d,  $J = 10.0$  Hz, 1H, 1/2(=CH<sub>2</sub>)), 5.11 (d,  $J = 17.0$  Hz, 1H, 1/2(=CH<sub>2</sub>)), 4.49 (d,  $J = 11.5$  Hz, 1H, CHI), 3.91–3.88 (m, 4H, ArCH & OCH<sub>3</sub>), 1.19 (s, 9H, C(CH<sub>3</sub>)<sub>3</sub>);  $^{13}\text{C}$  NMR (100 MHz,  $\text{CDCl}_3$ ):  $\delta$  168.7 (1C,  $\text{CO}_2\text{C}(\text{CH}_3)_3$ ), 166.7 (1C,  $\text{CO}_2\text{CH}_3$ ), 144.9 (1C, ArC), 138.3 (1C, CH=), 129.9 (2C, ArC), 129.1 (1C, ArC), 127.9 (2C, ArC), 118.5 (1C, =CH<sub>2</sub>), 82.2 (1C,  $\text{OC}(\text{CH}_3)_3$ ), 54.4 (1C, ArCH), 52.1 (1C, OCH<sub>3</sub>), 28.1 (1C, CHI), 27.3 (3C,  $\text{OC}(\text{CH}_3)_3$ ). IR (neat): 2978, 2949, 1724, 1608, 1435, 1369, 1280, 1157, 1114, 766, 709  $\text{cm}^{-1}$ . APCI-MS calcd for  $[\text{C}_{17}\text{H}_{22}\text{IO}_4, \text{M} + \text{H}]^+$ : 417.06. Found 417.06.

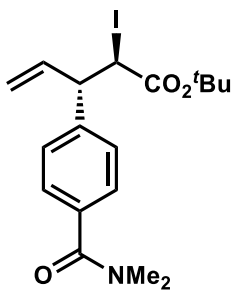

**(+)-tert-Butyl (2R, 3S)-3-(4-(dimethylcarbamoyl)phenyl)-2-iodopent-4-enoate, 5g:**

Colorless semi-oil, TLC  $R_f = 0.40$  (Hexane/EtOAc = 1:2, v/v), 63% yield, regioisomers ratio > 95:5, *anti* / *syn* = 94 : 6, 94% ee. HPLC conditions: Chiralcel OJ-H column (25 cm  $\times$  0.46 cm ID), hexane/2-propanol = 94:6, 0.5 mL/min, 220 nm UV detector,  $t_R = 21.10$  min (major) and  $t_R = 22.95$  min (minor).  $[\alpha]_D^{25} +32.7$  ( $c$  0.30,  $\text{CH}_2\text{Cl}_2$ ).  $^1\text{H}$  NMR (500 MHz,  $\text{CDCl}_3$ ):  $\delta$  7.37 (d,  $J = 8.0$  Hz, 2H, ArH), 7.23 (d,  $J = 8.0$  Hz, 2H, ArH), 6.00–5.88 (m, 1H, =CH), 5.19 (d,  $J = 10.0$  Hz, 1H, 1/2(=CH<sub>2</sub>)), 5.11 (d,  $J = 17.0$  Hz, 1H, 1/2(=CH<sub>2</sub>)), 4.47 (d,  $J = 11.5$  Hz, 1H, CHI), 3.87 (dd,  $J_1 = 11.5$  Hz and  $J_2 = 8.0$  Hz, 1H, ArCH), 3.09 (s, 3H, NCH<sub>3</sub>), 2.93 (s, 3H, NCH<sub>3</sub>), 1.21 (s, 9H, C(CH<sub>3</sub>)<sub>3</sub>).  $^{13}\text{C}$  NMR (100

MHz, CDCl<sub>3</sub>): δ 171.1 (1C, CON(CH<sub>3</sub>)<sub>2</sub>), 168.9 (1C, CO<sub>2</sub>C(CH<sub>3</sub>)<sub>3</sub>), 141.2 (1C, ArC), 138.6 (1C, =CH), 135.3 (1C, ArC), 127.9 (2C, ArC), 127.5 (2C, ArC), 118.2 (1C, =CH<sub>2</sub>), 82.1 (1C, OC(CH<sub>3</sub>)<sub>3</sub>), 54.2 (1C, ArCH), 39.5 (1C, NCH<sub>3</sub>), 35.3 (1C, NCH<sub>3</sub>), 28.5 (1C, CHI), 27.3 (3C, OC(CH<sub>3</sub>)<sub>3</sub>). IR (neat): 2978, 1727, 1634, 1393, 1270, 1157, 1081, 856 cm<sup>-1</sup>. APCI-MS calcd for [C<sub>18</sub>H<sub>25</sub>INO<sub>3</sub>, M + H]<sup>+</sup>: 430.09, Found 430.09.

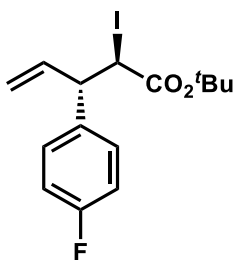

**(+)-tert-Butyl (2R, 3S)-3-(4-fluorophenyl)-2-iodopent-4-enoate, 5h:** Colorless semi-oil, TLC R<sub>f</sub> = 0.55 (Hexane/EtOAc = 30:1, v/v), 82% yield, regioisomers ratio = 94:6, *anti* / *syn* = 93 : 7, 93% ee (ee value was determined by transformation to **6h**). [α]<sub>D</sub><sup>23</sup> +14.0 (c 0.40, CH<sub>2</sub>Cl<sub>2</sub>). <sup>1</sup>H NMR (500 MHz, CDCl<sub>3</sub>): δ 7.19–7.12 (m, 2H, ArH), 7.02–6.95 (m, 2H, ArH), 6.00–5.90 (m, 1H, =CH), 5.19 (d, *J* = 10.5 Hz, 1H, 1/2(=CH<sub>2</sub>)), 5.09 (d, *J* = 17.0 Hz, 1H, 1/2(=CH<sub>2</sub>)), 4.41 (d, *J* = 11.5 Hz, 1H, CHI), 3.84 (dd, *J*<sub>1</sub> = 11.5 Hz and *J*<sub>2</sub> = 8.5 Hz, 1H, ArCH), 1.22 (s, 9H, C(CH<sub>3</sub>)<sub>3</sub>); <sup>13</sup>C NMR (100 MHz, CDCl<sub>3</sub>): δ 168.9 (1C, C=O), 161.9 (d, *J* = 244.9 Hz, 1C, C–F), 138.8 (1C, ArC), 135.3 (d, *J* = 3.3 Hz, 1C, =CH), 129.5 (d, *J* = 7.9 Hz, 2C, ArC), 118.0 (2C, ArC), 115.5 (d, *J* = 21.3 Hz, 1C, =CH<sub>2</sub>), 82.0 (1C, OC(CH<sub>3</sub>)<sub>3</sub>), 53.6 (1C, ArCH), 28.7 (1C, CHI), 27.3 (3C, OC(CH<sub>3</sub>)<sub>3</sub>). IR (neat): 2978, 2931, 1726, 1602, 1508, 1368, 1259, 1229, 1157, 1124, 834, 784 cm<sup>-1</sup>. APCI-MS calcd for [C<sub>15</sub>H<sub>19</sub>FIO<sub>2</sub>, M + H]<sup>+</sup>: 377.04, Found 377.04.

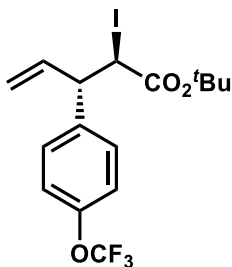

**(+)-tert-Butyl (2R, 3S)-2-iodo-3-(4-(trifluoromethoxy)phenyl)pent-4-enoate, 5i:**

Colorless semi-oil, TLC  $R_f = 0.65$  (Hexane/EtOAc = 30:1, v/v), 78% yield, regioisomers ratio > 95:5, *anti* / *syn* = 92 : 8, 93% ee (ee value was determined by transformation to **6i**).  $[\alpha]_D^{25} +21.5$  ( $c$  0.40,  $\text{CH}_2\text{Cl}_2$ ).  $^1\text{H}$  NMR (500 MHz,  $\text{CDCl}_3$ ):  $\delta$  7.25–7.21 (m, 2H, ArH), 7.18–7.13 (m, 2H, ArH), 6.00–5.90 (m, 1H, =CH), 5.21 (d,  $J = 10.0$  Hz, 1H, 1/2(=CH<sub>2</sub>)), 5.12 (d,  $J = 17.0$  Hz, 1H, 1/2(=CH<sub>2</sub>)), 4.42 (d,  $J = 11.5$  Hz, 1H, CHI), 3.87 (dd,  $J_1 = 11.5$  Hz and  $J_2 = 8.5$  Hz, 1H, ArCH), 1.19 (s, 9H, C(CH<sub>3</sub>)<sub>3</sub>).  $^{13}\text{C}$  NMR (100 MHz,  $\text{CDCl}_3$ ):  $\delta$  168.8 (1C, C=O), 148.3 (q,  $J = 2.1$  Hz, 1C, ArC), 138.4 (1C, ArC), 138.3 (1C, =CH), 129.3 (2C, ArC), 121.2 (2C, ArC), 120.4 (q,  $J = 256$  Hz, 1C, CF<sub>3</sub>), 118.3 (1C, =CH<sub>2</sub>), 82.2 (1C, OC(CH<sub>3</sub>)<sub>3</sub>), 53.8 (1C, ArCH), 28.3 (1C, CHI), 27.2 (3C, OC(CH<sub>3</sub>)<sub>3</sub>). IR (neat): 2981, 2934, 1728, 1508, 1370, 1264, 1222, 1163, 1125, 922, 846  $\text{cm}^{-1}$ . APCI-MS calcd for  $[\text{C}_{16}\text{H}_{19}\text{F}_3\text{IO}_3, \text{M} + \text{H}]^+$ : 443.03, Found 443.03.

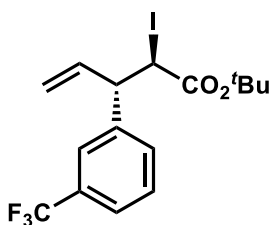

**(+)-tert-Butyl (2R, 3S)-2-iodo-3-(3-(trifluoromethyl)phenyl)pent-4-enoate, 5j:**

Colorless semi-oil, TLC  $R_f = 0.50$  (Hexane/EtOAc = 30:1, v/v), 72% yield, regioisomers ratio > 95:5, *anti* / *syn* = 94 : 6, 97% ee (ee value was determined by transformation to **6j**).  $[\alpha]_D^{25} +21.0$  ( $c$  0.40,  $\text{CH}_2\text{Cl}_2$ ).  $^1\text{H}$  NMR (500 MHz,  $\text{CDCl}_3$ ):  $\delta$  7.52–7.48 (m, 1H, ArH), 7.46–7.37 (m, 3H, ArH), 6.03–5.91 (m, 1H, =CH), 5.24 (d,  $J = 10.5$  Hz, 1H, 1/2(=CH<sub>2</sub>)), 5.14 (d,  $J = 16.5$  Hz, 1H, 1/2(=CH<sub>2</sub>)), 4.47 (d,  $J = 11.5$  Hz, 1H, CHI), 3.92 (dd,  $J_1 = 11.0$

Hz and  $J_2 = 8.5$  Hz, 1H, ArCH), 1.19 (s, 9H, C(CH<sub>3</sub>)<sub>3</sub>). <sup>13</sup>C NMR (100 MHz, CDCl<sub>3</sub>):  $\delta$  168.7 (1C, C=O), 140.7 (1C, ArC), 138.1 (1C, =CH), 131.3 (1C, ArC), 130.9 (q,  $J = 32.3$  Hz, 1C, ArC), 129.1 (1C, ArC), 124.8 (q,  $J = 3.7$  Hz, 1C, ArC), 124.2 (q,  $J = 3.8$  Hz, 1C, ArC), 123.9 (q,  $J = 271$  Hz, 1C, CF<sub>3</sub>), 118.7 (1C, =CH<sub>2</sub>), 82.3 (1C, OC(CH<sub>3</sub>)<sub>3</sub>), 54.2 (1C, ArCH), 28.0 (1C, CHI), 27.2 (3C, OC(CH<sub>3</sub>)<sub>3</sub>). IR (neat): 2981, 2933, 1727, 1370, 1330, 1274, 1164, 1128, 1074, 704 cm<sup>-1</sup>. APCI-MS calcd for [C<sub>16</sub>H<sub>19</sub>F<sub>3</sub>IO<sub>2</sub>, M + H]<sup>+</sup>: 427.04, Found 427.04.

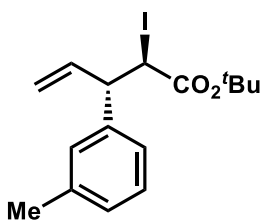

**(+)-tert-Butyl (2*R*, 3*S*)-2-iodo-3-(*m*-tolyl)pent-4-enoate, 5k:** Colorless oil, TLC  $R_f = 0.65$  (Hexane/EtOAc = 30:1, v/v), 87% yield, regioisomers ratio > 95:5, *anti* / *syn* = 95 : 5, 94% ee (ee value was determined by transformation to **6k**).  $[\alpha]_D^{25} +30.0$  ( $c$  0.50, CH<sub>2</sub>Cl<sub>2</sub>). <sup>1</sup>H NMR (500 MHz, CDCl<sub>3</sub>):  $\delta$  7.18 (t,  $J = 7.5$  Hz, 1H, ArH), 7.03 (d,  $J = 7.5$  Hz, 1H, ArH), 7.00–6.96 (m, 2H, ArH), 6.00–5.90 (m, 1H, =CH), 5.17 (d,  $J = 10.0$  Hz, 1H, 1/2(=CH<sub>2</sub>)), 5.12 (d,  $J = 17.0$  Hz, 1H, 1/2(=CH<sub>2</sub>)), 4.46 (d,  $J = 11.5$  Hz, 1H, CHI), 3.80 (dd,  $J_1 = 11.5$  Hz and  $J_2 = 9.0$  Hz, 1H, ArCH), 2.31 (s, 3H, CH<sub>3</sub>), 1.20 (s, 9H, C(CH<sub>3</sub>)<sub>3</sub>). <sup>13</sup>C NMR (100 MHz, CDCl<sub>3</sub>):  $\delta$  168.9 (1C, C=O), 139.5 (1C, ArC), 139.1 (1C, ArC), 138.2 (1C, =CH), 128.7 (1C, ArC), 128.5 (1C, ArC), 128.0 (1C, ArC), 124.7 (1C, ArC), 117.6 (1C, =CH<sub>2</sub>), 81.8 (1C, OC(CH<sub>3</sub>)<sub>3</sub>), 54.6 (1C, ArCH), 29.3 (1C, CHI), 27.3 (3C, OC(CH<sub>3</sub>)<sub>3</sub>), 21.4 (1C, CH<sub>3</sub>). IR (neat): 2978, 2929, 1729, 1368, 1274, 1154, 1122, 920, 844, 769, 704 cm<sup>-1</sup>. APCI-MS calcd for [C<sub>16</sub>H<sub>22</sub>IO<sub>2</sub>, M + H]<sup>+</sup>: 373.07, Found 373.07.

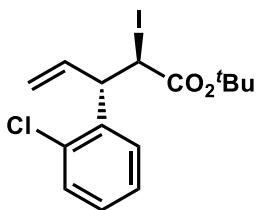

**(+)-tert-Butyl (2R, 3S)-3-(2-chlorophenyl)-2-iodopent-4-enoate, 5l:** Colorless oil, TLC  $R_f = 0.60$  (Hexane/EtOAc = 30:1, v/v), 64% yield, regioisomers ratio = 88:12, *anti* / *syn* > 95 : 5, 95% ee (ee value was determined by transformation to **6l**).  $[\alpha]_D^{25} +26.0$  ( $c$  0.40,  $\text{CH}_2\text{Cl}_2$ ).  $^1\text{H NMR}$  (500 MHz,  $\text{CDCl}_3$ ):  $\delta$  7.36 (t,  $J = 7.5$  Hz, 1H, ArH), 7.26–7.14 (m, 3H, ArH), 5.97–5.86 (m, 1H, =CH), 5.23–5.11 (m, 2H, =CH<sub>2</sub>), 4.63 (d,  $J = 11.5$  Hz, 1H, CHI), 4.47–4.37 (m, 1H, ArCH), 1.20 (s, 9H,  $\text{C}(\text{CH}_3)_3$ ).  $^{13}\text{C NMR}$  (100 MHz,  $\text{CDCl}_3$ ):  $\delta$  168.7 (1C, C=O), 137.5 (1C, ArC), 137.3 (1C, =CH), 133.7 (1C, ArC), 130.0 (1C, ArC), 128.3 (1C, ArC), 127.9 (1C, ArC), 127.0 (1C, ArC), 118.5 (1C, =CH<sub>2</sub>), 82.1 (1C,  $\text{OC}(\text{CH}_3)_3$ ), 50.4 (1C, ArCH), 28.0 (1C, CHI), 27.2 (3C,  $\text{OC}(\text{CH}_3)_3$ ). IR (neat): 2980, 1728, 1474, 1369, 1276, 1158, 1035, 924, 847, 754  $\text{cm}^{-1}$ . APCI-MS calcd for  $[\text{C}_{15}\text{H}_{19}\text{ClIO}_2, \text{M} + \text{H}]^+$ : 393.01, Found 393.01.

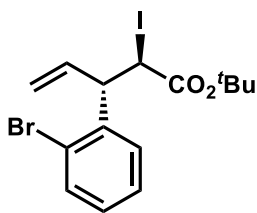

**(+)-tert-Butyl (2R, 3S)-3-(2-bromophenyl)-2-iodopent-4-enoate, 5m:** Colorless oil, TLC  $R_f = 0.55$  (Hexane/EtOAc = 30:1, v/v), 56% yield, regioisomers ratio = 82:18, *anti* / *syn* > 95 : 5, 95% ee (ee value was determined by transformation to **6m**).  $[\alpha]_D^{25} +22.5$  ( $c$  0.40,  $\text{CH}_2\text{Cl}_2$ ).  $^1\text{H NMR}$  (500 MHz,  $\text{CDCl}_3$ ):  $\delta$  7.56 (dd,  $J_1 = 8.0$  Hz and  $J_2 = 1.0$  Hz, 1H, ArH), 7.20–7.26 (m, 1H, ArH), 7.18 (dd,  $J_1 = 8.0$  Hz and  $J_2 = 1.5$  Hz, 1H, ArH), 7.11–7.05 (m, 1H, ArH), 5.94–5.82 (m, 1H, =CH), 5.23–5.13 (m, 2H, =CH<sub>2</sub>), 4.62 (d,  $J = 11.5$  Hz, 1H, CHI), 4.46–4.36 (m, 1H, ArCH), 1.20 (s, 9H,  $\text{C}(\text{CH}_3)_3$ ).  $^{13}\text{C NMR}$  (100 MHz,

CDCl<sub>3</sub>):  $\delta$  168.6 (1C, C=O), 139.1 (1C, ArC), 137.2 (1C, =CH), 133.3 (1C, ArC), 128.5 (1C, ArC), 127.8 (1C, ArC), 127.6 (1C, ArC), 124.5 (1C, ArC), 118.5 (1C, =CH<sub>2</sub>), 82.1 (1C, OC(CH<sub>3</sub>)<sub>3</sub>), 52.7 (1C, ArCH), 28.1 (1C, CHI), 27.2 (3C, OC(CH<sub>3</sub>)<sub>3</sub>). IR (neat): 2979, 1726, 1470, 1369, 1277, 1157, 1024, 924, 846, 753 cm<sup>-1</sup>. APCI-MS calcd for [C<sub>15</sub>H<sub>19</sub>BrIO<sub>2</sub>, M + H]<sup>+</sup>: 436.96, Found 436.96.

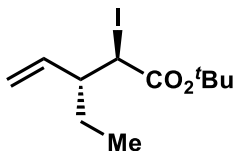

**(+)-tert-Butyl (2R, 3R)-3-ethyl-2-iodopent-4-enoate, 5n:** Colorless semi-oil, TLC R<sub>f</sub> = 0.70 (Hexane/EtOAc = 30:1, v/v), 72% yield, regioisomers ratio = >95 : 5, *anti* / *syn* = 94 : 6, 93% ee (ee value was determined by transformation to compound **6n**). [ $\alpha$ ]<sub>D</sub><sup>24</sup> +21.6 (*c* 0.50, CH<sub>2</sub>Cl<sub>2</sub>). <sup>1</sup>H NMR (500 MHz, CDCl<sub>3</sub>):  $\delta$  5.51–5.43 (m, 1H, CH=), 5.18 (dd, *J*<sub>1</sub> = 10.0 Hz and *J*<sub>2</sub> = 1.5 Hz, 1H, 1/2(=CH<sub>2</sub>)), 5.09 (dq, *J*<sub>1</sub> = 17.0 Hz and *J*<sub>2</sub> = 1.0 Hz, 1H, 1/2(=CH<sub>2</sub>)), 4.14 (d, *J* = 9.0 Hz, 1H, CHI), 2.32 (qd, *J*<sub>1</sub> = 9.0 Hz and *J*<sub>2</sub> = 4.0 Hz, 1H, CH), 1.57–1.51 (m, 1H, 1/2CH<sub>2</sub>), 1.46 (s, 9H, C(CH<sub>3</sub>)<sub>3</sub>), 1.35–1.28 (m, 1H, 1/2CH<sub>2</sub>), 0.90 (d, *J* = 7.5 Hz, 1H, CHI); <sup>13</sup>C NMR (100 MHz, CDCl<sub>3</sub>):  $\delta$  169.5 (1C, C=O), 139.0 (1C, =CH), 118.0 (1C, =CH<sub>2</sub>), 82.1 (1C, OC(CH<sub>3</sub>)<sub>3</sub>), 49.5 (1C, CH), 31.6 (1C, CHI), 27.6 (3C, OC(CH<sub>3</sub>)<sub>3</sub>), 25.8 (1C, CH<sub>2</sub>), 12.0 (1C, CH<sub>3</sub>). IR (neat): 2971, 2932, 1731, 1369, 1260, 1166, 1128, 919, 804 cm<sup>-1</sup>. APCI-MS calcd for [C<sub>11</sub>H<sub>20</sub>IO<sub>2</sub>, M + H]<sup>+</sup>: 311.05, Found 311.05.

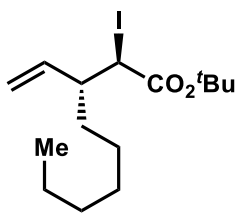

**(+)-tert-Butyl (2R, 3R)-2-iodo-3-vinylnonanoate, 5o:** Colorless semi-oil, TLC R<sub>f</sub> = 0.75 (Hexane/EtOAc = 30:1, v/v), 78% yield, regioisomers ratio = >95:5, *anti* / *syn* = 93 : 7,

91% ee (ee value was determined by transformation to compound **6o**).  $[\alpha]_D^{24} +21.6$  (*c* 0.50, CH<sub>2</sub>Cl<sub>2</sub>). <sup>1</sup>H NMR (500 MHz, CDCl<sub>3</sub>): δ 5.58–5.41 (m, 1H, CH=), 5.16 (dd, *J*<sub>1</sub> = 10.5 Hz and *J*<sub>2</sub> = 2.0 Hz, 1H, 1/2(=CH<sub>2</sub>)), 5.10–5.04 (m, 1H, 1/2(=CH<sub>2</sub>)), 4.11 (d, *J* = 9.5 Hz, 1H, CHI), 2.45–2.36 (m, 1H, CH), 1.46 (s, 9H, C(CH<sub>3</sub>)<sub>3</sub>), 1.37–1.17 (m, 10H, 5CH<sub>2</sub>), 0.86 (*t*, *J* = 7.0 Hz, 3H, CH<sub>3</sub>); <sup>13</sup>C NMR (100 MHz, CDCl<sub>3</sub>): δ 169.5 (1C, C=O), 139.3 (1C, =CH), 117.8 (1C, =CH<sub>2</sub>), 82.0 (1C, OC(CH<sub>3</sub>)<sub>3</sub>), 47.9 (1C, CHI), 32.7 (1C, CH), 31.9 (1C, CH<sub>2</sub>), 31.6 (1C, CH<sub>2</sub>), 29.0 (1C, CH<sub>2</sub>), 27.6 (3C, OC(CH<sub>3</sub>)<sub>3</sub>), 27.3 (1C, CH<sub>2</sub>), 22.6 (1C, CH<sub>2</sub>), 14.0 (1C, CH<sub>3</sub>). IR (neat): 2930, 2857, 1731, 1369, 1275, 1160, 1128, 918, 845 cm<sup>-1</sup>. APCI-MS calcd for [C<sub>15</sub>H<sub>28</sub>IO<sub>2</sub>, M + H]<sup>+</sup>: 367.11, Found 367.14.

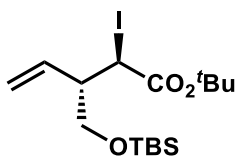

**(+)-tert-Butyl (2R, 3S)-3-(((tert-butyldimethylsilyl)oxy)methyl)-2-iodopent-4-enoate, 5p:** Colorless semi-oil, TLC *R<sub>f</sub>* = 0.80 (Hexane/EtOAc = 30:1, v/v), 82% yield, regioisomers ratio = >95:5, *anti* / *syn* > 95 : 5, 92% ee (ee value was determined by transformation to compound **6p**).  $[\alpha]_D^{24} +40.7$  (*c* 0.60, CH<sub>2</sub>Cl<sub>2</sub>). <sup>1</sup>H NMR (500 MHz, CDCl<sub>3</sub>): δ 5.77–5.68 (m, 1H, =CH), 5.21–5.12 (m, 2H, =CH<sub>2</sub>), 4.59 (d, *J* = 7.5 Hz, 1H, CHI), 3.71–3.67 (m, 1H, 1/2(CH<sub>2</sub>O)), 3.54–3.49 (m, 1H, 1/2(CH<sub>2</sub>O)), 2.46–2.39 (m, 1H, CH), 1.46 (s, 9H, OC(CH<sub>3</sub>)<sub>3</sub>), 0.89 (s, 9H, SiC(CH<sub>3</sub>)<sub>3</sub>), 0.05 (s, 3H, SiCH<sub>3</sub>), 0.04 (s, 3H, SiCH<sub>3</sub>); <sup>13</sup>C NMR (100 MHz, CDCl<sub>3</sub>): δ 169.9 (1C, C=O), 133.2 (1C, CH=), 126.5 (1C, CH=), 81.9 (1C, OC(CH<sub>3</sub>)<sub>3</sub>), 63.2 (1C, OCH<sub>2</sub>), 38.9 (1C, CHI), 27.6 (3C, OC(CH<sub>3</sub>)<sub>3</sub>), 25.9 (3C, SiC(CH<sub>3</sub>)<sub>3</sub>), 22.1 (1C, CH<sub>2</sub>), 18.4 (1C, SiC(CH<sub>3</sub>)<sub>3</sub>), -5.2 (2C, Si(CH<sub>3</sub>)<sub>2</sub>). IR (neat): 2956, 2930, 2858, 1729, 1472, 1369, 1257, 1164, 1104, 837, 777 cm<sup>-1</sup>. APCI-MS calcd for [C<sub>16</sub>H<sub>32</sub>IO<sub>2</sub>Si, M + H]<sup>+</sup>: 427.11, Found 427.12.



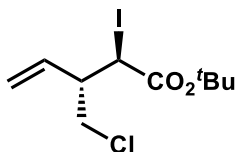

**(+)-tert-Butyl (2R, 3S)-3-(chloromethyl)-2-iodopent-4-enoate, 5q:** Colorless semi-oil, TLC  $R_f = 0.80$  (Hexane/EtOAc = 30:1, v/v), 66% yield, regioisomers ratio = >95:5, *anti* / *syn* > 95 : 5, 92% ee (ee value was determined by transformation to compound **7q**).  $[\alpha]_D^{24} +21.0$  ( $c$  0.40, CH<sub>2</sub>Cl<sub>2</sub>). <sup>1</sup>H NMR (500 MHz, CDCl<sub>3</sub>):  $\delta$  5.78–5.70 (m, 1H, =CH), 5.30 (d,  $J = 10.5$  Hz, 1H, 1/2(=CH<sub>2</sub>)), 5.28–5.22 (m, 1H, 1/2(=CH<sub>2</sub>)), 4.60 (d,  $J = 7.0$  Hz, 1H, CHI), 3.72–3.67 (m, 1H, 1/2(CH<sub>2</sub>Cl)), 3.61–3.55 (m, 1H, 1/2(CH<sub>2</sub>Cl)), 2.71–2.64 (m, 1H, CH), 1.46 (s, 9H, OC(CH<sub>3</sub>)<sub>3</sub>); <sup>13</sup>C NMR (100 MHz, CDCl<sub>3</sub>):  $\delta$  168.7 (1C, C=O), 136.0 (1C, CH=), 119.5 (1C, =CH<sub>2</sub>), 82.7 (1C, OC(CH<sub>3</sub>)<sub>3</sub>), 48.6 (1C, CH<sub>2</sub>Cl), 46.5 (1C, CHI), 27.7 (1C, CH), 27.6 (3C, OC(CH<sub>3</sub>)<sub>3</sub>). IR (neat): 2980, 2933, 1726, 1370, 1276, 1156, 928, 844, 748 cm<sup>-1</sup>. APCI-MS calcd for [C<sub>10</sub>H<sub>17</sub>ClIO<sub>2</sub>, M + H]<sup>+</sup>: 331.00, Found 331.02.

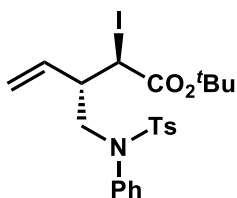

**(+)-tert-Butyl (2R, 3S)-2-iodo-3-(((4-methyl-N-phenylphenyl)sulfonamido)methyl)pent-4-enoate, 5r:** Colorless semi-oil, TLC  $R_f = 0.60$  (Hexane/EtOAc = 6:1, v/v), 58% yield, regioisomers ratio > 95 : 5, *anti* / *syn* = 95 : 5, 87% ee. HPLC conditions: Chiralcel AS-H column (25 cm × 0.46 cm ID), hexane/2-propanol = 95 : 5, 0.8 mL/min, 210 nm UV detector,  $t_R = 21.65$  min (minor) and  $t_R = 27.89$  min (major).  $[\alpha]_D^{25} +8.0$  ( $c$  0.40, CH<sub>2</sub>Cl<sub>2</sub>). <sup>1</sup>H NMR (500 MHz, CDCl<sub>3</sub>):  $\delta$  7.43 (d,  $J = 8.5$  Hz, 2H, ArH), 7.32–7.28 (m, 3H, ArH), 7.23 (d,  $J = 8.0$  Hz, 2H, ArH), 7.04–6.99 (m, 2H, ArH), 5.70–5.60 (m, 1H, =CH), 5.23 (d,  $J = 10.5$  Hz, 1H, 1/2(=CH<sub>2</sub>)), 5.08 (d,  $J = 17.0$  Hz, 1H, 1/2(=CH<sub>2</sub>)), 4.43 (d,  $J = 6.0$  Hz, 1H, CHI), 3.80–3.74 (m, 1H, 1/2(CH<sub>2</sub>N)), 3.63–3.57 (m, 1H, 1/2(CH<sub>2</sub>N)), 2.42 (s, 3H, ArCH<sub>3</sub>),

2.40–2.34 (m, 1H, CH), 1.41 (s, 9H, OC(CH<sub>3</sub>)<sub>3</sub>); <sup>13</sup>C NMR (100 MHz, CDCl<sub>3</sub>): δ 168.7 (1C, C=O), 143.5 (1C, ArC), 139.0 (1C, ArC), 136.3 (1C, CH=), 134.7 (1C, ArC), 129.4 (2C, ArC), 129.0 (2C, ArC), 128.8 (2C, ArC), 128.0 (1C, ArC), 127.8 (2C, ArC), 119.4 (1C, =CH<sub>2</sub>), 82.5 (1C, OC(CH<sub>3</sub>)<sub>3</sub>), 52.8 (1C, CH<sub>2</sub>N), 45.9 (1C, CHI), 27.9 (1C, CH), 27.6 (3C, OC(CH<sub>3</sub>)<sub>3</sub>), 21.5 (1C, ArCH<sub>3</sub>). IR (neat): 2980, 2931, 1724, 1596, 1493, 1455, 1368, 1350, 1277, 1163, 1092, 917, 815, 727, 696, 657 cm<sup>-1</sup>. APCI-MS calcd for [C<sub>23</sub>H<sub>29</sub>INO<sub>4</sub>S, M + H]<sup>+</sup>: 542.09, Found 542.09.

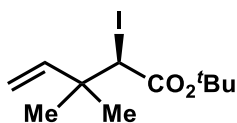

**(+)-tert-Butyl (R)-2-iodo-3,3-dimethylpent-4-enoate, 5s:** Colorless semi-oil, TLC R<sub>f</sub> = 0.75 (Hexane/EtOAc = 30:1, v/v), 82% yield, regioisomers ratio = >95:5, 91% ee (ee value was determined by transformation to compound **6s**). [α]<sub>D</sub><sup>24</sup> +5.3 (c 0.60, CH<sub>2</sub>Cl<sub>2</sub>). <sup>1</sup>H NMR (500 MHz, CDCl<sub>3</sub>): δ 5.94 (dd, J<sub>1</sub> = 17.5 Hz and J<sub>2</sub> = 10.5 Hz, 1H, CH=), 5.09 (dd, J<sub>1</sub> = 10.5 Hz and J<sub>2</sub> = 1.0 Hz, 1H, 1/2(=CH<sub>2</sub>)), 5.06 (s, 1H, 1/2(=CH<sub>2</sub>)), 4.16 (s, 1H, CHI), 1.44 (s, 9H, C(CH<sub>3</sub>)<sub>3</sub>), 1.27 (s, 3H, CH<sub>3</sub>), 1.24 (s, 3H, CH<sub>3</sub>); <sup>13</sup>C NMR (100 MHz, CDCl<sub>3</sub>): δ 169.1 (1C, C=O), 142.7 (1C, =CH), 113.6 (1C, =CH<sub>2</sub>), 81.9 (1C, OC(CH<sub>3</sub>)<sub>3</sub>), 39.4 (1C, C), 38.9 (1C, CHI), 27.6 (3C, OC(CH<sub>3</sub>)<sub>3</sub>), 25.9 (1C, CH<sub>3</sub>), 24.9 (1C, CH<sub>3</sub>). IR (neat): 2975, 2930, 1732, 1368, 1257, 1167, 1127, 919, 847 cm<sup>-1</sup>. APCI-MS calcd for [C<sub>11</sub>H<sub>20</sub>IO<sub>2</sub>, M + H]<sup>+</sup>: 311.05, Found 311.05.

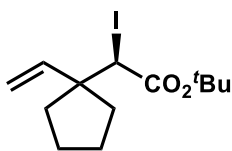

**(+)-tert-Butyl (R)-2-iodo-2-(1-vinylcyclopentyl)acetate, 5t:** Colorless semi-oil, TLC R<sub>f</sub> = 0.70 (Hexane/EtOAc = 30:1, v/v), 73% yield, regioisomers ratio = >95:5, 92% ee (ee value was determined by transformation to compound **S11t**). [α]<sub>D</sub><sup>25</sup> +19.2 (c 0.50,

CH<sub>2</sub>Cl<sub>2</sub>). <sup>1</sup>H NMR (500 MHz, CDCl<sub>3</sub>): δ 5.95 (dd,  $J_1 = 17.5$  Hz and  $J_2 = 10.5$  Hz, 1H, CH=), 5.16 (d,  $J = 11.0$  Hz, 1H, 1/2(=CH<sub>2</sub>)), 5.09 (d,  $J = 17.5$  Hz, 1H, 1/2(=CH<sub>2</sub>)), 4.35 (s, 1H, CHI), 1.94–1.87 (m, 1H, 1/2CH<sub>2</sub>), 1.81–1.75 (m, 1H, 1/2CH<sub>2</sub>), 1.74–1.58 (m, 6H, 3CH<sub>2</sub>), 1.43 (s, 9H, C(CH<sub>3</sub>)<sub>3</sub>); <sup>13</sup>C NMR (100 MHz, CDCl<sub>3</sub>): δ 169.1 (1C, C=O), 140.8 (1C, CH=), 114.5 (1C, =CH<sub>2</sub>), 81.8 (1C, OC(CH<sub>3</sub>)<sub>3</sub>), 51.5 (1C, C), 38.2 (1C, CHI), 36.2 (1C, CH<sub>2</sub>), 36.1 (1C, CH<sub>2</sub>), 27.6 (3C, OC(CH<sub>3</sub>)<sub>3</sub>), 24.1 (1C, CH<sub>2</sub>), 24.0 (1C, CH<sub>2</sub>). IR (neat): 2959, 1731, 1368, 1161, 1120, 917, 849 cm<sup>-1</sup>. APCI-MS calcd for [C<sub>13</sub>H<sub>22</sub>IO<sub>2</sub>, M + H]<sup>+</sup>: 337.07, Found 337.07.

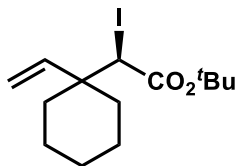

**(+)-*tert*-Butyl (*R*)-2-iodo-2-(1-vinylcyclohexyl)acetate, 5u:** Colorless semi-oil, TLC  $R_f = 0.80$  (Hexane/EtOAc = 30:1, v/v), 72% yield, regioisomers ratio > 95:5, 85% ee (ee value was determined by transformation to compound **S11u**).  $[\alpha]_D^{24} +8.0$  ( $c$  0.30, CH<sub>2</sub>Cl<sub>2</sub>). <sup>1</sup>H NMR (500 MHz, CDCl<sub>3</sub>): δ 5.74 (dd,  $J_1 = 17.5$  Hz and  $J_2 = 11.0$  Hz, 1H, CH=), 5.31 (dd,  $J_1 = 11.0$  Hz and  $J_2 = 1.0$  Hz, 1H, 1/2(=CH<sub>2</sub>)), 5.10 (dd,  $J_1 = 18.0$  Hz and  $J_2 = 1.0$  Hz, 1H, 1/2(=CH<sub>2</sub>)), 4.19 (s, 1H, CHI), 1.70–1.40 (m, 10H, 5CH<sub>2</sub>), 1.43 (s, 9H, C(CH<sub>3</sub>)<sub>3</sub>); <sup>13</sup>C NMR (100 MHz, CDCl<sub>3</sub>): δ 169.0 (1C, C=O), 140.0 (1C, =CH), 116.9 (1C, =CH<sub>2</sub>), 81.8 (1C, OC(CH<sub>3</sub>)<sub>3</sub>), 42.0 (1C, C), 41.0 (1C, CHI), 34.0 (1C, CH<sub>2</sub>), 33.7 (1C, CH<sub>2</sub>), 27.7 (3C, OC(CH<sub>3</sub>)<sub>3</sub>), 25.9 (1C, CH<sub>2</sub>), 22.5 (1C, CH<sub>2</sub>), 22.0 (1C, CH<sub>2</sub>). IR (neat): 2933, 2857, 1732, 1455, 1368, 1152, 1118, 921, 847 cm<sup>-1</sup>. APCI-MS calcd for [C<sub>14</sub>H<sub>24</sub>IO<sub>2</sub>, M + H]<sup>+</sup>: 351.08, Found 351.10.

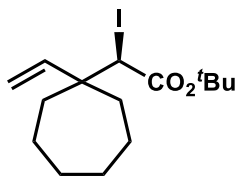

**(+)-tert-Butyl (R)-2-iodo-2-(1-vinylcycloheptyl)acetate, 5v:** Colorless semi-oil, TLC  $R_f = 0.75$  (Hexane/EtOAc = 30:1, v/v), 74% yield, regioisomers ratio = >95:5, 91% ee (ee value was determined by transformation to compound **S11v**).  $[\alpha]_D^{24} +8.8$  ( $c$  0.50,  $\text{CH}_2\text{Cl}_2$ ).  $^1\text{H}$  NMR (500 MHz,  $\text{CDCl}_3$ ):  $\delta$  5.95 (dd,  $J_1 = 17.5$  Hz and  $J_2 = 11.0$  Hz, 1H, CH=), 5.18 (dd,  $J_1 = 11.0$  Hz and  $J_2 = 0.5$  Hz, 1H, 1/2(=CH<sub>2</sub>)), 5.04 (d,  $J = 17.5$  Hz, 1H, 1/2(=CH<sub>2</sub>)), 4.23 (s, 1H, CHI), 1.91–1.77 (m, 2H, CH<sub>2</sub>), 1.75–1.67 (m, 2H, CH<sub>2</sub>), 1.67–1.54 (m, 4H, 2CH<sub>2</sub>), 1.50–1.45 (m, 4H, 2CH<sub>2</sub>), 1.43 (s, 9H, C(CH<sub>3</sub>)<sub>3</sub>);  $^{13}\text{C}$  NMR (100 MHz,  $\text{CDCl}_3$ ):  $\delta$  169.1 (1C, C=O), 142.8 (1C, CH=), 114.3 (1C, =CH<sub>2</sub>), 81.8 (1C, OC(CH<sub>3</sub>)<sub>3</sub>), 45.0 (1C, C), 40.5 (1C, CHI), 36.3 (1C, CH<sub>2</sub>), 34.7 (1C, CH<sub>2</sub>), 29.6 (1C, CH<sub>2</sub>), 29.5 (1C, CH<sub>2</sub>), 27.6 (3C, OC(CH<sub>3</sub>)<sub>3</sub>), 23.2 (1C, CH<sub>2</sub>), 22.6 (1C, CH<sub>2</sub>). IR (neat): 2925, 2857, 1731, 1368, 1117, 915, 849  $\text{cm}^{-1}$ . APCI-MS calcd for  $[\text{C}_{15}\text{H}_{26}\text{IO}_2, \text{M} + \text{H}]^+$ : 365.10, Found 365.10.

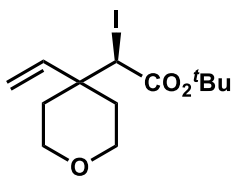

**(+)-tert-Butyl (R)-2-iodo-2-(4-vinyltetrahydro-2H-pyran-4-yl)acetate, 5w:** Colorless semi-oil, TLC  $R_f = 0.35$  (Hexane/EtOAc = 10:1, v/v), 75% yield, regioisomers ratio > 95 : 5, 92% ee. HPLC conditions: Chiralcel AS-H column (25 cm  $\times$  0.46 cm ID), hexane/2-propanol = 95:5, 0.5 mL/min, 280 nm UV detector,  $t_R = 8.28$  min (major) and  $t_R = 8.84$  min (minor).  $[\alpha]_D^{25} +14.5$  ( $c$  0.44,  $\text{CH}_2\text{Cl}_2$ ).  $^1\text{H}$  NMR (500 MHz,  $\text{CDCl}_3$ ):  $\delta$  5.74 (dd,  $J_1 = 18.0$  Hz and  $J_2 = 11.0$  Hz, 1H, CH=), 5.45 (d,  $J = 11.0$  Hz, 1H, 1/2(=CH<sub>2</sub>)), 5.16 (d,  $J = 17.5$  Hz, 1H, 1/2(=CH<sub>2</sub>)), 4.14 (s, 1H, CHI), 3.80–3.74 (m, 2H, CH<sub>2</sub>O), 3.53 (qd,

$J_1 = 12.0$  Hz and  $J_2 = 2.5$  Hz, 2H, CH<sub>2</sub>O), 2.07–1.96 (m, 2H, CH<sub>2</sub>), 1.82–1.74 (m, 1H, 1/2CH<sub>2</sub>), 1.55–1.51 (m, 1H, 1/2CH<sub>2</sub>), 1.43 (s, 9H, C(CH<sub>3</sub>)<sub>3</sub>); <sup>13</sup>C NMR (100 MHz, CDCl<sub>3</sub>): δ 168.5 (1C, C=O), 138.0 (1C, CH=), 118.7 (1C, =CH<sub>2</sub>), 82.1 (1C, OC(CH<sub>3</sub>)<sub>3</sub>), 64.3 (1C, CH<sub>2</sub>O), 64.2 (1C, CH<sub>2</sub>O), 40.3 (1C, C), 40.1 (1C, CHI), 34.4 (1C, CH<sub>2</sub>), 33.9 (2C, 2CH<sub>2</sub>), 27.6 (3C, OC(CH<sub>3</sub>)<sub>3</sub>). IR (neat): 2976, 2853, 1729, 1368, 1250, 1143, 1109, 1017, 997, 930, 842 cm<sup>-1</sup>. APCI-MS calcd for [C<sub>13</sub>H<sub>22</sub>IO<sub>3</sub>, M + H]<sup>+</sup>: 353.06, Found 353.06.

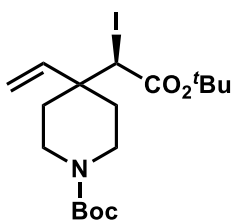

**(+)-*tert*-Butyl**

**(*R*)-4-(2-(*tert*-butoxy)-1-iodo-2-oxoethyl)-4-vinylpiperidine-1-carboxylate, **5x**:**

Colorless semi-oil, TLC  $R_f = 0.40$  (Hexane/EtOAc = 4:1, v/v), 36% yield, regioisomers ratio > 95 : 5, 82% ee. HPLC conditions: Chiralcel AD-H column (25 cm × 0.46 cm ID), hexane/2-propanol = 95:5, 0.5 mL/min, 210 nm UV detector,  $t_R = 10.58$  min (major) and  $t_R = 11.25$  min (minor).  $[\alpha]_D^{25} +24.0$  ( $c$  0.15, CH<sub>2</sub>Cl<sub>2</sub>). <sup>1</sup>H NMR (500 MHz, CDCl<sub>3</sub>): δ 5.71 (dd,  $J_1 = 18.0$  Hz and  $J_2 = 11.0$  Hz, 1H, CH=), 5.42 (d,  $J = 11.0$  Hz, 1H, 1/2(=CH<sub>2</sub>)), 5.14 (d,  $J = 18.0$  Hz, 1H, 1/2(=CH<sub>2</sub>)), 4.12 (s, 1H, CHI), 3.97–3.72 (m, 2H, NCH<sub>2</sub>), 2.87 (brs, 2H, NCH<sub>2</sub>), 2.08–2.00 (m, 1H, 1/2CH<sub>2</sub>), 1.84 (td,  $J_1 = 13.0$  Hz and  $J_2 = 4.5$  Hz, 1H, 1/2CH<sub>2</sub>), 1.63–1.53 (m, 2H, CH<sub>2</sub>), 1.43 (s, 9H, C(CH<sub>3</sub>)<sub>3</sub>), 1.41 (s, 9H, C(CH<sub>3</sub>)<sub>3</sub>); <sup>13</sup>C NMR (100 MHz, CDCl<sub>3</sub>): δ 168.5 (1C, C=O), 154.7 (1C, C=O), 137.7 (1C, CH=), 118.7 (1C, =CH<sub>2</sub>), 82.2 (1C, OC(CH<sub>3</sub>)<sub>3</sub>), 79.5 (1C, OC(CH<sub>3</sub>)<sub>3</sub>), 41.0 (1C, CHI), 39.5 (1C, C), 33.5 (2C, 2NCH<sub>2</sub>), 32.9 (2C, 2CH<sub>2</sub>), 28.4 (3C, OC(CH<sub>3</sub>)<sub>3</sub>), 27.6 (3C, OC(CH<sub>3</sub>)<sub>3</sub>). IR (neat): 2977, 2934, 1729, 1694, 1423, 1367, 1279, 1248, 1162, 999, 926, 849, 770 cm<sup>-1</sup>. APCI-MS calcd for [C<sub>18</sub>H<sub>31</sub>INO<sub>4</sub>, M + H]<sup>+</sup>: 452.13, Found 452.13.

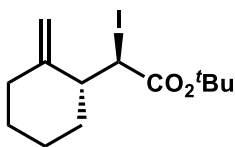

**(+)-tert-Butyl (R)-2-iodo-2-((R)-2-methylenecyclohexyl)acetate, 5y:** Colorless semi-oil, TLC  $R_f = 0.70$  (Hexane/EtOAc = 30:1, v/v), 82% yield, regioisomers ratio > 95 : 5, *anti* / *syn* = >95 : 5, 93% ee (ee value was determined by transformation to compound **6y**).  $[\alpha]_D^{24} +25.6$  ( $c$  0.50,  $\text{CH}_2\text{Cl}_2$ ).  $^1\text{H NMR}$  (500 MHz,  $\text{CDCl}_3$ ):  $\delta$  4.85 (s, 1H, 1/2(=CH<sub>2</sub>)), 4.71 (s, 1H, 1/2(=CH<sub>2</sub>)), 4.43 (d,  $J = 11.5$  Hz, 1H, CHI), 2.80–2.72 (m, 1H, CH), 2.16–2.01 (m, 2H, CH<sub>2</sub>), 1.79–1.50 (m, 6H, 3CH<sub>2</sub>), 1.47 (s, 9H, OC(CH<sub>3</sub>)<sub>3</sub>);  $^{13}\text{C NMR}$  (100 MHz,  $\text{CDCl}_3$ ):  $\delta$  170.2 (1C, C=O), 148.5 (1C, =C), 110.3 (1C, =CH<sub>2</sub>), 81.9 (1C, OC(CH<sub>3</sub>)<sub>3</sub>), 47.6 (1C, CHI), 32.8 (1C, CH), 30.4 (1C, CH<sub>2</sub>), 28.4 (1C, CH<sub>2</sub>), 28.1 (1C, CH<sub>2</sub>), 27.6 (3C, OC(CH<sub>3</sub>)<sub>3</sub>), 22.3 (1C, CH<sub>2</sub>). IR (neat): 2979, 2933, 2859, 1731, 1451, 1369, 1282, 1152, 1132, 893, 844  $\text{cm}^{-1}$ . APCI-MS calcd for  $[\text{C}_{13}\text{H}_{22}\text{IO}_2, \text{M} + \text{H}]^+$ : 337.07, Found 337.09.

## 6. Gram-Scale Experiment

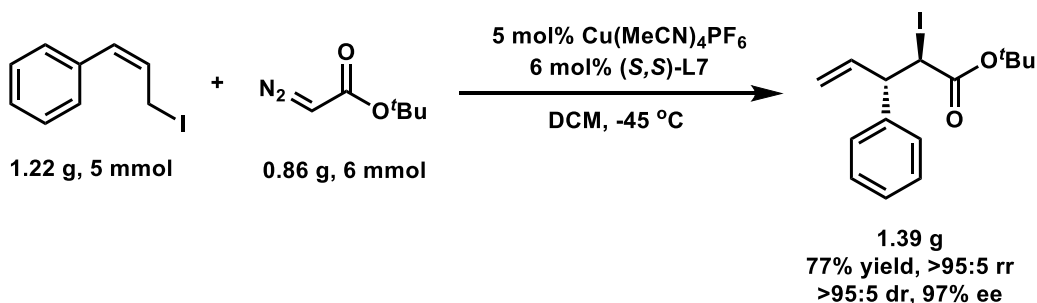

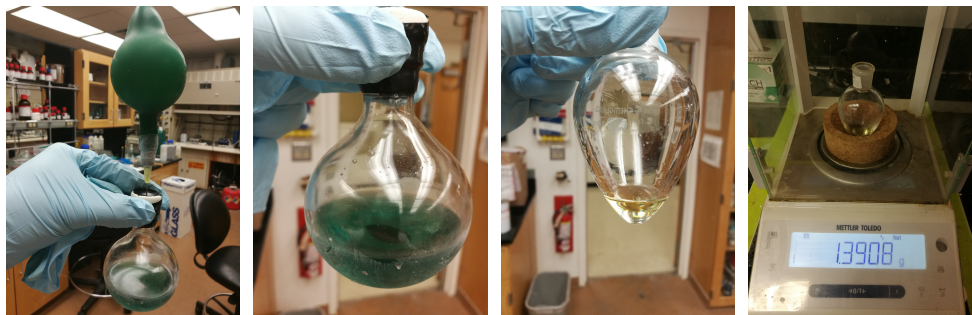

A 100 mL flask was charged with  $[\text{Cu}(\text{MeCN})_4]\text{PF}_6$  (93.0 mg, 0.25 mmol) and (*S,S*)-L7 (88.2 mg, 0.3 mmol). The flask was then evacuated and refilled with Argon. After dry  $\text{CH}_2\text{Cl}_2$  (30 mL) was added, the mixture was stirred at 23 °C for 2 h. Then the mixture was cooled to -45 °C, followed by addition of a mixed solution of (*Z*)-**1a** (1.22 g, 5 mmol) and **2b** (0.86 g, 6 mmol) in  $\text{CH}_2\text{Cl}_2$  (10 mL). The mixture was stirred at -45 °C until the reaction was complete (48 h), and then the mixture was concentrated and purified by flash column chromatography on silica gel (Hexane/EtOAc = 30:1) to afford 1.39 g desired [2,3]-rearrangement products **5a** as a light yellow oil, 77% yield, >95:5 r.r., 95:5 d.r., and 97% ee.

## 7. Transformations of [2,3]-Rearrangement Products

### 7A. Conversion of terminal C=C double bond to alcohol

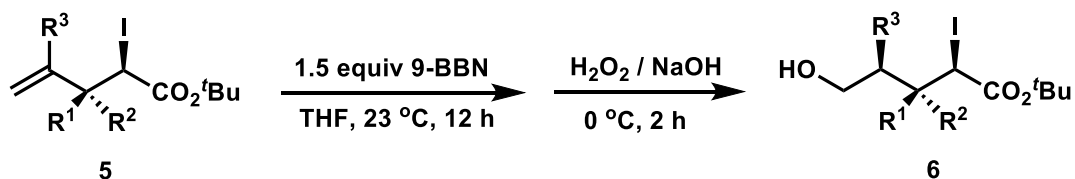

**Typical procedure:** An 8 mL reaction vial was charged with [2,3]-rearrangement product (**5**, 0.1 mmol) and dry THF (2 mL). The mixture was stirred at 0 °C, followed by addition of 9-BBN (0.5 M in THF, 0.3 mL, 0.15 mmol). The mixture was then warmed to 23 °C and stirred for 12 h. The reaction was cooled to 0 °C again and treated with  $\text{H}_2\text{O}$

(0.2 mL) and a mixed solution of aqueous NaOH (3N, 0.1 mL) and H<sub>2</sub>O<sub>2</sub> (30%, 0.2 mL). Two hours later, the reaction solution was diluted with H<sub>2</sub>O (5 mL) and Et<sub>2</sub>O (25 mL). The organic layer was separated, washed with H<sub>2</sub>O (5 mL x 2), concentrated and purified by flash column chromatography on silica gel (Hexane/EtOAc = 4:1) to afford alcohol product **6**.

### 7B. Transformation of C–I bond to C–S bond

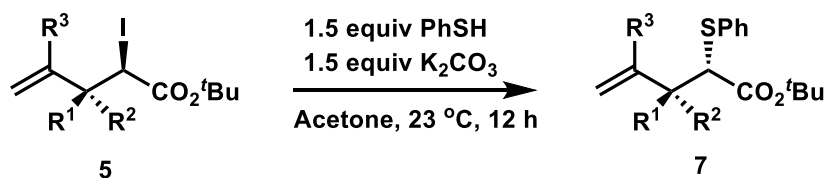

**Typical procedure:** An 8 mL reaction vial was charged with PhSH (17 mg, 0.15 mmol), K<sub>2</sub>CO<sub>3</sub> (21 mg, 0.15 mmol) and acetone (2 mL). The mixture was stirred at 23 °C for 10 min and then treated with a solution of [2,3]-rearrangement product (**5**, 0.1 mmol), acetone (1 mL). The reaction was stirred at 23 °C for 12 h, concentrated and purified by flash column chromatography on silica gel (Hexane/EtOAc = 30:1) to afford desired product **7**.

### 7C. Transformation of C–I bond to C–N bond

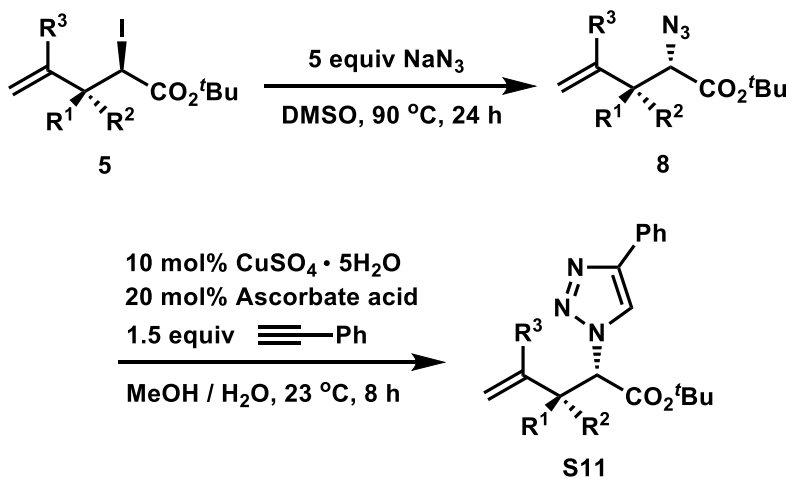



**Typical procedure:** An 8 mL reaction vial was charged with NaN<sub>3</sub> (65 mg, 1 mmol), [2,3]-rearrangement product (**5**, 0.2 mmol) and dry DMSO (2 mL). The mixture was stirred at 90 °C for 24 hours, then cooled to 23 °C and diluted with H<sub>2</sub>O (5 mL) and Et<sub>2</sub>O (40 mL). The organic layer was separated, washed with H<sub>2</sub>O (5 mL x 2), concentrated and purified by flash column chromatography on silica gel (Hexane/EtOAc = 30:1) to afford alcohol product **8**. An 8 mL reaction vial was charged with CuSO<sub>4</sub>·5H<sub>2</sub>O (2.5 mg, 0.01 mmol), Ascorbate acid (CAS NO. 134-03-2, 4.2 mg, 0.02 mmol), H<sub>2</sub>O (1 mL) and MeOH (1 mL). The mixture was stirred at room temperature for 5 min, followed by addition of phenylacetylene (16 mg, 0.15 mmol). After 2 additional min, a solution of [2,3]-rearrangement product (**5**, 0.1 mmol) in MeOH (1 mL) was added. The mixture was stirred at 23 °C for 12 h. The mixture was then extracted by CH<sub>2</sub>Cl<sub>2</sub> (10 mL x 3). The organic layer was combined, concentrated and purified by flash column chromatography on silica gel (Hexane/EtOAc = 8:1) to afford cycloaddition product **S11**.

#### 7D. Transformation of C–I bond to C–C bond

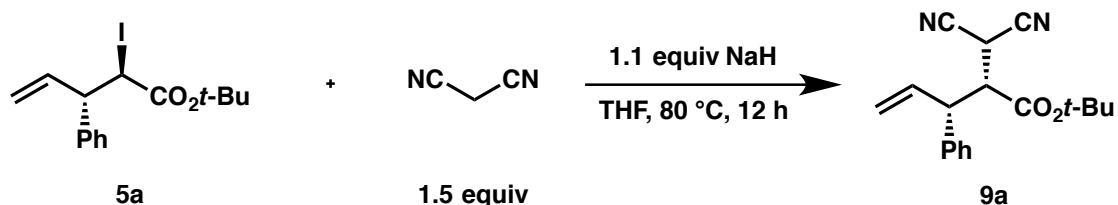

**Typical procedure:** An 8 mL reaction vial was charged with NaH (60wt%, 4.5 mg, 0.11 mmol), malononitrile (10 mg, 0.15 mmol) and dry THF (1 mL). The mixture was stirred at 23 °C for 30 minutes and then treated with a solution of [2,3]-rearrangement product (**5a**, 0.1 mmol) in THF (1 mL). The reaction was then stirred at 80 °C in an oil bath for 12 h, quenched with H<sub>2</sub>O (10 µL), concentrated and diluted in Et<sub>2</sub>O (15 mL) and EtOAc (15 mL). The organic layer was washed with H<sub>2</sub>O (10 mL x 3), concentrated and purified by

flash column chromatography on silica gel (Hexane/EtOAc = 10:1) to afford desired product **9a**.

### 7E. Transformation of C–I bond to C–H bond

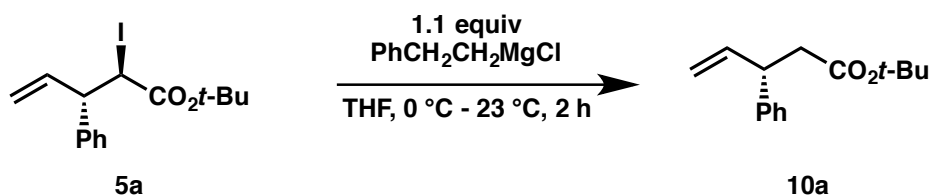

**Typical procedure:** An 8 mL reaction vial was charged with [2,3]-rearrangement product (**5a**, 0.1 mmol) and dry THF (1 mL). The mixture was stirred at 0 °C and treated with PhCH<sub>2</sub>CH<sub>2</sub>MgCl (1.0 M in THF, 110 μL, 0.11 mmol). Two hours later, 10 μL H<sub>2</sub>O was added and the reaction solution was concentrated and purified by flash column chromatography on silica gel (Hexane/EtOAc = 30:1) to afford desired product **10a**.

## 8. Characterization Data for Transformation Products

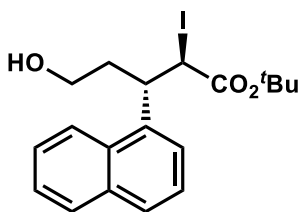

**(+)-tert-Butyl (2R, 3S)-5-hydroxy-2-iodo-3-(naphthalen-1-yl)pentanoate, 6c:**  
Colorless semi-oil, TLC R<sub>f</sub> = 0.35 (Hexane/EtOAc = 5:1, v/v), 88% yield, *anti* / *syn* > 95 : 5, 90% ee. HPLC conditions: Chiralcel OD-H column (25 cm × 0.46 cm ID), hexane/2-propanol = 85:15, 0.8 mL/min, 220 nm UV detector, t<sub>R</sub> = 9.02 min (minor) and t<sub>R</sub> = 18.91 min (major). [α]<sub>D</sub><sup>24</sup> +12.0 (c 0.30, CH<sub>2</sub>Cl<sub>2</sub>). <sup>1</sup>H NMR (500 MHz, CDCl<sub>3</sub>): δ 8.23 (d, *J* = 8.5 Hz, 1H, ArH), 7.83 (d, *J* = 8.0 Hz, 1H, ArH), 7.74 (d, *J* = 8.0 Hz, 1H, ArH), 7.55 (t, *J* = 7.5 Hz, 1H, ArH), 7.49 (t, *J* = 7.5 Hz, 1H, ArH), 7.45 (t, *J* = 7.5 Hz, 1H,

ArH), 7.38 (d,  $J = 7.0$  Hz, 1H, ArH), 4.68 (d,  $J = 11.0$  Hz, 1H, CHI), 4.25 (td,  $J_1 = 11.0$  Hz and  $J_2 = 3.0$  Hz, 1H, ArCH), 3.54–3.47 (m, 1H, 1/2(HOCH<sub>2</sub>)), 3.37–3.29 (m, 1H, 1/2(HOCH<sub>2</sub>)), 2.68–2.59 (m, 1H, 1/2CH<sub>2</sub>), 1.97–1.88 (m, 1H, 1/2CH<sub>2</sub>), 1.22 (brs, 1H, OH), 0.87 (s, 9H, C(CH<sub>3</sub>)<sub>3</sub>); <sup>13</sup>C NMR (100 MHz, CDCl<sub>3</sub>): δ 168.9 (1C, CO<sub>2</sub>C(CH<sub>3</sub>)<sub>3</sub>), 136.7 (1C, ArC), 133.8 (1C, ArC), 132.3 (1C, ArC), 128.8 (1C, ArC), 127.8 (1C, ArC), 126.3 (1C, ArC), 125.8 (1C, ArC), 125.3 (1C, ArC), 123.6 (1C, ArC), 123.5 (1C, ArC), 81.6 (1C, OC(CH<sub>3</sub>)<sub>3</sub>), 60.2 (1C, HOCH<sub>2</sub>), 40.0 (1C, ArCH), 39.1 (1C, CH<sub>2</sub>), 32.0 (1C, CHI), 26.9 (3C, OC(CH<sub>3</sub>)<sub>3</sub>). IR (neat): 2929, 1720, 1368, 1284, 1156, 843, 781 cm<sup>-1</sup>. APCI-MS calcd for [C<sub>19</sub>H<sub>24</sub>IO<sub>3</sub>, M + H]<sup>+</sup>: 427.08, Found 427.08.

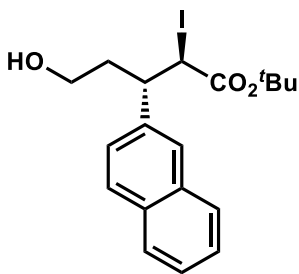

**(+)-tert-Butyl (2R, 3S)-5-hydroxy-2-iodo-3-(naphthalen-2-yl)pentanoate, 6d:**  
 Colorless semi-oil, TLC R<sub>f</sub> = 0.35 (Hexane/EtOAc = 5:1, v/v), 84% yield, *anti* / *syn* = 93 : 7, 96% ee. HPLC conditions: Chiralcel OJ-H column (25 cm × 0.46 cm ID), hexane/2-propanol = 85:15, 0.5 mL/min, 210 nm UV detector,  $t_R$  = 11.67 min (major) and  $t_R$  = 14.27 min (minor).  $[\alpha]_D^{23} +3.5$  ( $c$  0.80, CH<sub>2</sub>Cl<sub>2</sub>). <sup>1</sup>H NMR (500 MHz, CDCl<sub>3</sub>): δ 7.82–7.75 (m, 3H, ArH), 7.65 (s, 1H, ArH), 7.49–7.43 (m, 2H, ArH), 7.31 (dd,  $J_1 = 8.5$  Hz and  $J_2 = 1.5$  Hz, 1H, ArH), 4.55 (d,  $J = 11.5$  Hz, 1H, CHI), 3.56–3.50 (m, 1H, 1/2(HOCH<sub>2</sub>)), 3.44 (td,  $J_1 = 11.5$  Hz and  $J_2 = 3.0$  Hz, 1H, ArCH), 3.41–3.35 (m, 1H, 1/2(HOCH<sub>2</sub>)), 2.58–2.49 (m, 1H, 1/2CH<sub>2</sub>), 1.93–1.84 (m, 1H, 1/2CH<sub>2</sub>), 1.74–1.63 (m, 1H, OH), 1.08 (s, 9H, C(CH<sub>3</sub>)<sub>3</sub>); <sup>13</sup>C NMR (100 MHz, CDCl<sub>3</sub>): δ 169.1 (1C, CO<sub>2</sub>C(CH<sub>3</sub>)<sub>3</sub>), 136.5 (1C, ArC), 133.2 (1C, ArC), 132.7 (1C, ArC), 128.4 (1C, ArC), 127.7 (1C, ArC), 127.6 (1C, ArC), 127.4 (1C, ArC), 126.2 (1C, ArC), 125.9 (1C, ArC), 125.6 (1C, ArC), 81.8 (1C, OC(CH<sub>3</sub>)<sub>3</sub>), 60.4 (1C, HOCH<sub>2</sub>), 46.7 (1C, ArCH), 38.4 (1C, CH<sub>2</sub>), 31.1 (1C,

CHI), 27.2 (3C, OC(CH<sub>3</sub>)<sub>3</sub>). IR (neat): 2976, 2929, 1725, 1368, 1282, 1155, 1049, 819, 746 cm<sup>-1</sup>. APCI-MS calcd for [C<sub>19</sub>H<sub>24</sub>IO<sub>3</sub>, M + H]<sup>+</sup>: 427.08, Found 427.08.

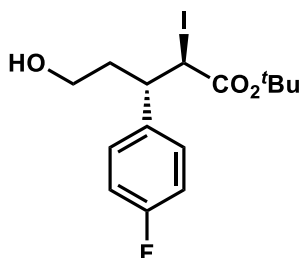

**(+)-tert-Butyl (2R, 3S)-3-(4-fluorophenyl)-5-hydroxy-2-iodopentanoate, 6h:** Colorless semi-oil, TLC R<sub>f</sub> = 0.30 (Hexane/EtOAc = 5:1, v/v), 80% yield, *anti* / *syn* = 92 : 8, 93% ee, HPLC conditions: Chiralcel AD-H column (25 cm × 0.46 cm ID), hexane/2-propanol = 90:10, 0.8 mL/min, 220 nm UV detector, t<sub>R</sub> = 10.18 min (major) and t<sub>R</sub> = 12.24 min (minor). [α]<sub>D</sub><sup>23</sup> +2.0 (c 0.20, CH<sub>2</sub>Cl<sub>2</sub>). <sup>1</sup>H NMR (500 MHz, CDCl<sub>3</sub>): δ 7.19–7.13 (m, 2H, ArH), 7.05–6.95 (m, 2H, ArH), 4.38 (d, *J* = 11.0 Hz, 1H, CHI), 3.56–3.49 (m, 1H, 1/2(HOCH<sub>2</sub>)), 3.38–3.31 (m, 1H, 1/2(HOCH<sub>2</sub>)), 3.26 (td, *J*<sub>1</sub> = 11.5 Hz and *J*<sub>2</sub> = 3.0 Hz, 1H, ArCH), 2.51–2.43 (m, 1H, 1/2CH<sub>2</sub>), 1.76–1.68 (m, 1H, 1/2CH<sub>2</sub>), 1.63 (brs, 1H, OH), 1.19 (s, 9H, C(CH<sub>3</sub>)<sub>3</sub>); <sup>13</sup>C NMR (100 MHz, CDCl<sub>3</sub>): δ 169.0 (1C, CO<sub>2</sub>C(CH<sub>3</sub>)<sub>3</sub>), 161.9 (d, *J* = 245.2 Hz, 1C, ArC), 134.8 (d, *J* = 3.3 Hz, 1C, ArC), 129.7 (d, *J* = 8.0 Hz, 2C, ArC), 115.5 (d, *J* = 21.3 Hz, 2C, ArC), 81.9 (1C, OC(CH<sub>3</sub>)<sub>3</sub>), 60.2 (1C, HOCH<sub>2</sub>), 45.9 (1C, ArCH), 38.4 (1C, CH<sub>2</sub>), 30.8 (1C, d, *J* = 1.2 Hz, CHI), 27.3 (3C, OC(CH<sub>3</sub>)<sub>3</sub>). IR (neat): 2977, 2932, 1724, 1602, 1508, 1368, 1226, 1159, 1049, 837, 728 cm<sup>-1</sup>. APCI-MS calcd for [C<sub>15</sub>H<sub>21</sub>FIO<sub>3</sub>, M + H]<sup>+</sup>: 395.05, Found 395.05.

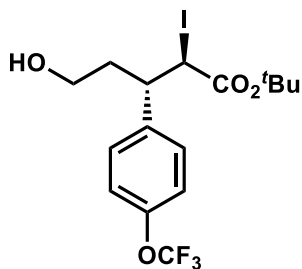

**(+)-tert-Butyl (2R, 3S)-5-hydroxy-2-iodo-3-(4-(trifluoromethoxy)phenyl)pentanoate, 6i:** White solid, mp: 89–90 °C. TLC  $R_f$  = 0.50 (Hexane/EtOAc = 5:1, v/v), 75% yield, *anti* / *syn* > 95 : 5, 93% ee, HPLC conditions: Chiralcel AS-H column (25 cm × 0.46 cm ID), hexane/2-propanol = 95:5, 0.8 mL/min, 220 nm UV detector,  $t_R$  = 9.30 min (major) and  $t_R$  = 10.88 min (minor).  $[\alpha]_D^{25}$  +2.0 ( $c$  0.40,  $\text{CH}_2\text{Cl}_2$ ).  $^1\text{H}$  NMR (500 MHz,  $\text{CDCl}_3$ ):  $\delta$  7.25–7.21 (m, 12H, ArH), 7.18–7.12 (m, 2H, ArH), 4.39 (d,  $J$  = 11.0 Hz, 1H, CHI), 3.59–3.51 (m, 1H, 1/2(HOCH<sub>2</sub>)), 3.40–3.34 (m, 1H, 1/2(HOCH<sub>2</sub>)), 3.31 (td,  $J_1$  = 11.5 Hz and  $J_2$  = 3.0 Hz, 1H, ArCH), 2.53–2.44 (m, 1H, 1/2CH<sub>2</sub>), 1.78–1.70 (m, 1H, 1/2CH<sub>2</sub>), 1.25 (brs, 1H, OH), 1.16 (s, 9H, C(CH<sub>3</sub>)<sub>3</sub>);  $^{13}\text{C}$  NMR (100 MHz,  $\text{CDCl}_3$ ):  $\delta$  169.0 (1C,  $\text{CO}_2\text{C}(\text{CH}_3)_3$ ), 148.3 (q,  $J$  = 1.7 Hz, 1C, ArC), 138.0 (1C, ArC), 129.5 (2C, ArC), 121.2 (2C, ArC), 120.4 (q,  $J$  = 256 Hz, 1C, CF<sub>3</sub>), 82.0 (1C, OC(CH<sub>3</sub>)<sub>3</sub>), 60.1 (1C, HOCH<sub>2</sub>), 46.1 (1C, ArCH), 38.3 (1C, CH<sub>2</sub>), 30.3 (1C, CHI), 27.2 (3C, OC(CH<sub>3</sub>)<sub>3</sub>). IR (neat): 2927, 1720, 1506, 1372, 1271, 1213, 1163, 1129, 1047, 841  $\text{cm}^{-1}$ . APCI-MS calcd for  $[\text{C}_{16}\text{H}_{21}\text{F}_3\text{IO}_4, \text{M} + \text{H}]^+$ : 461.04, Found 461.04.

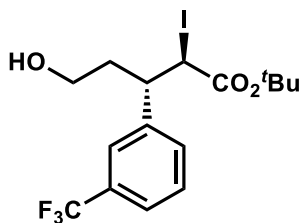

**(+)-tert-Butyl (2R, 3S)-5-hydroxy-2-iodo-3-(3-(trifluoromethyl)phenyl)pentanoate, 6j:** Colorless semi-oil, TLC  $R_f$  = 0.30 (Hexane/EtOAc = 5:1, v/v), 76% yield, *anti* / *syn* = 95 : 5, 97% ee, HPLC conditions: Chiralcel AD-H column (25 cm × 0.46 cm ID), hexane/2-propanol = 90:10, 0.8 mL/min, 220 nm UV detector,  $t_R$  = 6.71 min (major) and

$t_R = 7.42$  min (minor).  $[\alpha]_D^{25} +4.0$  ( $c$  0.20,  $\text{CH}_2\text{Cl}_2$ ).  $^1\text{H}$  NMR (400 MHz,  $\text{CDCl}_3$ ):  $\delta$  7.55–7.49 (m, 1H, ArH), 7.48–7.38 (m, 3H, ArH), 4.44 (d,  $J = 11.2$  Hz, 1H, CHI), 3.60–3.51 (m, 1H,  $1/2(\text{HOCH}_2)$ ), 3.42–3.30 (m, 2H,  $1/2(\text{HOCH}_2) + \text{ArCH}$ ), 2.56–2.44 (m, 1H,  $1/2\text{CH}_2$ ), 1.84–1.74 (m, 1H,  $1/2\text{CH}_2$ ), 1.26–1.20 (brs, 1H, OH), 1.16 (s, 9H,  $\text{C}(\text{CH}_3)_3$ );  $^{13}\text{C}$  NMR (100 MHz,  $\text{CDCl}_3$ ):  $\delta$  168.9 (1C,  $\text{CO}_2\text{C}(\text{CH}_3)_3$ ), 140.4 (1C, ArC), 131.4 (1C, ArC), 130.9 (q,  $J = 32.1$  Hz, 1C, ArC), 129.1 (1C, ArC), 125.0 (q,  $J = 3.8$  Hz, 1C, ArC), 124.3 (q,  $J = 3.8$  Hz, 1C, ArC), 123.9 (q,  $J = 271$  Hz, 1C,  $\text{CF}_3$ ), 82.1 (1C,  $\text{OC}(\text{CH}_3)_3$ ), 60.0 (1C,  $\text{HOCH}_2$ ), 46.5 (1C, ArCH), 38.2 (1C,  $\text{CH}_2$ ), 30.0 (1C, CHI), 27.1 (3C,  $\text{OC}(\text{CH}_3)_3$ ). IR (neat): 2980, 2934, 1726, 1328, 1164, 1128, 1076, 843, 806, 704  $\text{cm}^{-1}$ . APCI-MS calcd for  $[\text{C}_{16}\text{H}_{21}\text{F}_3\text{IO}_3, \text{M} + \text{H}]^+$ : 445.05, Found 445.05.

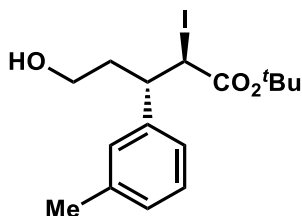

**(+)-tert-Butyl (2R, 3S)-5-hydroxy-2-iodo-3-(*m*-tolyl)pentanoate, 6k:** Colorless semi-oil, TLC  $R_f = 0.40$  (Hexane/EtOAc = 5:1, v/v), 86% yield, *anti* / *syn* > 95 : 5, 94% ee, HPLC conditions: Chiralcel OD-H column (25 cm  $\times$  0.46 cm ID), hexane/2-propanol = 90:10, 0.8 mL/min, 230 nm UV detector,  $t_R = 7.27$  min (minor) and  $t_R = 8.96$  min (major).  $[\alpha]_D^{25} +1.5$  ( $c$  0.40,  $\text{CH}_2\text{Cl}_2$ ).  $^1\text{H}$  NMR (500 MHz,  $\text{CDCl}_3$ ):  $\delta$  7.17 (t,  $J = 7.5$  Hz, 1H, ArH), 7.04 (d,  $J = 7.5$  Hz, 1H, ArH), 7.00–6.95 (m, 2H, ArH), 4.41 (d,  $J = 11.0$  Hz, 1H, CHI), 3.56–3.49 (m, 1H,  $1/2(\text{HOCH}_2)$ ), 3.43–3.36 (m, 1H,  $1/2(\text{HOCH}_2)$ ), 3.20 (td,  $J_1 = 11.5$  Hz and  $J_2 = 3.0$  Hz, 1H, ArCH), 2.50–2.41 (m, 1H,  $1/2\text{CH}_2$ ), 2.31 (s, 3H,  $\text{CH}_3$ ), 1.81–1.72 (m, 1H,  $1/2\text{CH}_2$ ), 1.23 (brs, 1H, OH), 1.17 (s, 9H,  $\text{C}(\text{CH}_3)_3$ );  $^{13}\text{C}$  NMR (100 MHz,  $\text{CDCl}_3$ ):  $\delta$  169.1 (1C,  $\text{CO}_2\text{C}(\text{CH}_3)_3$ ), 138.9 (1C, ArC), 138.1 (1C, ArC), 128.9 (1C, ArC), 128.5 (1C, ArC), 128.2 (1C, ArC), 125.0 (1C, ArC), 81.6 (1C,  $\text{OC}(\text{CH}_3)_3$ ), 60.6 (1C,  $\text{HOCH}_2$ ), 46.8 (1C, ArCH), 38.5 (1C,  $\text{CH}_2$ ), 31.4 (1C, CHI), 27.2 (3C,  $\text{OC}(\text{CH}_3)_3$ ), 21.4 (1C,  $\text{CH}_3$ ). IR

(neat): 2977, 2930, 1727, 1368, 1257, 1155, 1050, 844, 705  $\text{cm}^{-1}$ . APCI-MS calcd for  $[\text{C}_{16}\text{H}_{24}\text{IO}_3, \text{M} + \text{H}]^+$ : 391.08, Found 391.08.

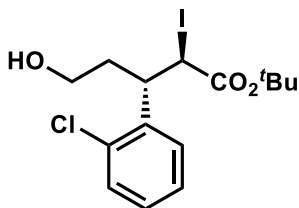

**(+)-tert-Butyl (2R, 3S)-3-(2-chlorophenyl)-5-hydroxy-2-iodopentanoate, 6l:** Colorless semi-oil, TLC  $R_f = 0.40$  (Hexane/EtOAc = 5:1, v/v), 76% yield, *anti* / *syn* > 95 : 5, 95% ee, HPLC conditions: Chiralcel AD-H column (25 cm  $\times$  0.46 cm ID), hexane/2-propanol = 90:10, 0.8 mL/min, 210 nm UV detector,  $t_R = 11.02$  min (major) and  $t_R = 12.37$  min (minor).  $[\alpha]_D^{25} +6.1$  ( $c$  0.33,  $\text{CH}_2\text{Cl}_2$ ).  $^1\text{H}$  NMR (500 MHz,  $\text{CDCl}_3$ ):  $\delta$  7.36 (d,  $J = 8.0$  Hz, 1H, ArH), 7.25–7.15 (m, 3H, ArH), 4.75–4.35 (m, 1H, CHI), 3.97–3.62 (m, 1H,  $1/2(\text{HOCH}_2)$ ), 3.58–3.42 (m, 2H,  $1/2(\text{HOCH}_2)$ +ArCH), 2.52–2.40 (m, 1H,  $1/2\text{CH}_2$ ), 1.95–1.65 (m, 1H,  $1/2\text{CH}_2$ ), 1.49–1.37 (m, 1H, OH), 1.19 (s, 9H,  $\text{C}(\text{CH}_3)_3$ );  $^{13}\text{C}$  NMR (100 MHz,  $\text{CDCl}_3$ ):  $\delta$  168.9 (1C, C=O), 137.6 (1C, ArC), 134.4 (1C, ArC), 129.9 (1C, ArC), 128.5 (2C, ArC), 127.2 (1C, ArC), 82.0 (1C,  $\text{OC}(\text{CH}_3)_3$ ), 60.1 (1C,  $\text{HOCH}_2$ ), 42.0 (1C, ArCH), 38.3 (1C,  $\text{CH}_2$ ), 30.1 (1C, CHI), 27.2 (3C,  $\text{OC}(\text{CH}_3)_3$ ). IR (neat): 2929, 1725, 1475, 1368, 1288, 1258, 1157, 1051, 754  $\text{cm}^{-1}$ . APCI-MS calcd for  $[\text{C}_{15}\text{H}_{21}\text{ClIO}_3, \text{M} + \text{H}]^+$ : 411.02, Found 411.02.

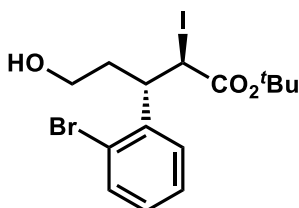

**(+)-tert-Butyl (2R, 3S)-3-(2-bromophenyl)-5-hydroxy-2-iodopentanoate, 6m:** Colorless semi-oil, TLC  $R_f = 0.40$  (Hexane/EtOAc = 5:1, v/v), 72% yield, *anti* / *syn* > 95 :

5, 95% ee, HPLC conditions: Chiralcel AD-H column (25 cm × 0.46 cm ID), hexane/2-propanol = 90:10, 0.8 mL/min, 210 nm UV detector,  $t_R$  = 11.49 min (major) and  $t_R$  = 13.38 min (minor).  $[\alpha]_D^{24}$  +4.8 ( $c$  0.33, CH<sub>2</sub>Cl<sub>2</sub>). <sup>1</sup>H NMR (500 MHz, CDCl<sub>3</sub>): δ 7.55 (d,  $J$  = 8.0 Hz, 1H, ArH), 7.30 (t,  $J$  = 7.5 Hz, 1H, ArH), 7.21 (dd,  $J_1$  = 8.0 Hz and  $J_2$  = 1.0 Hz, 1H, ArH), 7.09 (td,  $J_1$  = 8.0 Hz and  $J_2$  = 2.0 Hz, 1H, ArH), 4.54 (d,  $J$  = 10.5 Hz, 1H, CHI), 3.90–3.73 (m, 1H, 1/2(HOCH<sub>2</sub>)), 3.59–3.41 (m, 2H, 1/2(HOCH<sub>2</sub>)+ArCH), 2.54–2.36 (m, 1H, 1/2CH<sub>2</sub>), 1.86–1.72 (m, 1H, 1/2CH<sub>2</sub>), 1.52 (brs, 1H, OH), 1.20 (s, 9H, C(CH<sub>3</sub>)<sub>3</sub>); <sup>13</sup>C NMR (100 MHz, CDCl<sub>3</sub>): δ 168.9 (1C, C=O), 139.4 (1C, ArC), 133.1 (1C, ArC), 128.7 (1C, ArC), 127.8 (1C, ArC), 127.4 (1C, ArC), 125.5 (1C, ArC), 82.1 (1C, OC(CH<sub>3</sub>)<sub>3</sub>), 59.9 (1C, HOCH<sub>2</sub>), 44.8 (1C, ArCH), 38.6 (1C, CH<sub>2</sub>), 30.4 (1C, CHI), 27.2 (3C, OC(CH<sub>3</sub>)<sub>3</sub>). IR (neat): 2925, 1723, 1472, 1368, 1257, 1157, 1051, 754, 668 cm<sup>-1</sup>. APCI-MS calcd for [C<sub>15</sub>H<sub>21</sub>BrIO<sub>3</sub>, M + H]<sup>+</sup>: 454.97, Found 454.97.

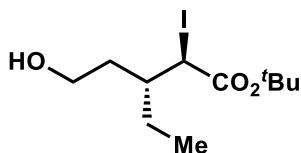

**(+)-tert-Butyl (2R, 3R)-3-ethyl-5-hydroxy-2-iodopentanoate, 6n:** Colorless semi-oil, TLC  $R_f$  = 0.45 (Hexane/EtOAc = 5:1, v/v), 84% yield, *anti* / *syn* > 95 : 5, 93% ee. HPLC conditions: Chiralcel AS-H column (25 cm × 0.46 cm ID), hexane/2-propanol = 90:10, 0.5 mL/min, 280 nm UV detector,  $t_R$  = 10.38 min (major) and  $t_R$  = 11.76 min (minor).  $[\alpha]_D^{24}$  +18.0 ( $c$  0.50, CH<sub>2</sub>Cl<sub>2</sub>). <sup>1</sup>H NMR (500 MHz, CDCl<sub>3</sub>): δ 4.42 (d,  $J$  = 6.0 Hz, 1H, CHI), 3.75–3.61 (m, 2H, OCH<sub>2</sub>), 1.95–1.87 (m, 1H, CH), 1.78 (brs, 1H, OH), 1.60–1.48 (m, 3H, CH<sub>2</sub>+1/2CH<sub>2</sub>), 1.46 (s, 9H, C(CH<sub>3</sub>)<sub>3</sub>), 1.41–1.32 (m, 1H, 1/2CH<sub>2</sub>), 0.91 (t,  $J$  = 7.5 Hz, 1H, CH<sub>3</sub>); <sup>13</sup>C NMR (100 MHz, CDCl<sub>3</sub>): δ 170.1 (1C, C=O), 82.3 (1C, OC(CH<sub>3</sub>)<sub>3</sub>), 60.4 (1C, HOCH<sub>2</sub>), 39.2 (1C, CHI), 36.7 (1C, CH), 33.3 (1C, CH<sub>2</sub>), 27.6 (3C, OC(CH<sub>3</sub>)<sub>3</sub>), 25.3 (1C, CH<sub>2</sub>), 11.1 (1C, CH<sub>3</sub>). IR (neat): 2931, 1727, 1368, 1156, 1055, 845 cm<sup>-1</sup>. APCI-MS calcd for [C<sub>11</sub>H<sub>22</sub>IO<sub>3</sub>, M + H]<sup>+</sup>: 329.06, Found 329.06.



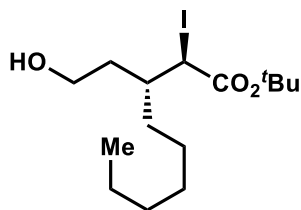

**(+)-tert-Butyl (2R, 3R)-3-(2-hydroxyethyl)-2-iodononanoate, 6o:** Colorless semi-oil, TLC  $R_f = 0.50$  (Hexane/EtOAc = 5:1, v/v), 80% yield, *anti* / *syn* > 95 : 5, 91% ee. HPLC conditions: Chiralcel AS-H column (25 cm × 0.46 cm ID), hexane/2-propanol = 90:10, 0.5 mL/min, 210 nm UV detector,  $t_R = 8.56$  min (major) and  $t_R = 9.24$  min (minor).  $[\alpha]_D^{24} +28.0$  ( $c$  0.40, CH<sub>2</sub>Cl<sub>2</sub>). <sup>1</sup>H NMR (500 MHz, CDCl<sub>3</sub>):  $\delta$  4.41 (d,  $J = 6.0$  Hz, 1H, CHI), 3.76–3.61 (m, OCH<sub>2</sub>), 1.94–1.86 (m, 1H, CH), 1.75 (brs, 1H, OH), 1.65–1.50 (m, 2H, CH<sub>2</sub>), 1.46 (s, 9H, C(CH<sub>3</sub>)<sub>3</sub>), 1.37–1.18 (m, 10H, 5CH<sub>2</sub>), 0.87 (t,  $J = 7.0$  Hz, 3H, CH<sub>3</sub>); <sup>13</sup>C NMR (100 MHz, CDCl<sub>3</sub>):  $\delta$  170.0 (1C, C=O), 82.3 (1C, OC(CH<sub>3</sub>)<sub>3</sub>), 60.3 (1C, HOCH<sub>2</sub>), 37.8 (1C, CHI), 37.1 (1C, CH), 33.8 (1C, CH<sub>2</sub>), 32.6 (1C, CH<sub>2</sub>), 31.7 (1C, CH<sub>2</sub>), 29.3 (1C, CH<sub>2</sub>), 27.6 (3C, OC(CH<sub>3</sub>)<sub>3</sub>), 26.6 (1C, CH<sub>2</sub>), 22.6 (1C, CH<sub>2</sub>), 14.0 (1C, CH<sub>3</sub>). IR (neat): 2928, 2856, 1728, 1368, 1257, 1156, 1122, 845 cm<sup>-1</sup>. APCI-MS calcd for [C<sub>15</sub>H<sub>30</sub>IO<sub>3</sub>, M + H]<sup>+</sup>: 385.12, Found 385.12.

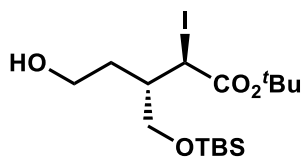

**(+)-tert-Butyl (2R, 3S)-3-(((tert-butyldimethylsilyl)oxy)methyl)-5-hydroxy-2-iodopentanoate, 6p:** Colorless semi-oil, TLC  $R_f = 0.55$  (Hexane/EtOAc = 5:1, v/v), 78% yield, *anti* / *syn* > 95 : 5, 92% ee. HPLC conditions: Chiralcel AS-H column (25 cm × 0.46 cm ID), hexane/2-propanol = 97 : 3, 0.4 mL/min, 280 nm UV detector,  $t_R = 11.88$  min (major) and  $t_R = 12.32$  min (minor).  $[\alpha]_D^{25} +22.9$  ( $c$  0.36, CH<sub>2</sub>Cl<sub>2</sub>). <sup>1</sup>H NMR (400 MHz, CDCl<sub>3</sub>):  $\delta$  4.58 (d,  $J = 6.0$  Hz, 1H, CHI), 3.72–3.64 (m, 3H, 1/2CH<sub>2</sub>OTBS + CH<sub>2</sub>OH), 3.56–3.50 (m,

1H, 1/2CH<sub>2</sub>OTBS), 2.54–2.44 (m, 1H, CH), 1.96–1.87 (m, 1H, 1/2CH<sub>2</sub>), 1.86–1.80 (m, 1H, OH), 1.59–1.52 (m, 1H, 1/2CH<sub>2</sub>), 1.46 (s, 9H, OC(CH<sub>3</sub>)<sub>3</sub>), 0.90 (s, 9H, SiC(CH<sub>3</sub>)<sub>3</sub>), 0.08 (s, 3H, SiCH<sub>3</sub>), 0.07 (s, 3H, SiCH<sub>3</sub>); <sup>13</sup>C NMR (100 MHz, CDCl<sub>3</sub>): δ 170.1 (1C, C=O), 82.3 (1C, OC(CH<sub>3</sub>)<sub>3</sub>), 63.9 (1C, CH<sub>2</sub>OTBS), 60.5 (1C, CH<sub>2</sub>OH), 41.2 (1C, CHI), 35.3 (1C, CH<sub>2</sub>), 29.9 (1C, CH), 27.6 (3C, OC(CH<sub>3</sub>)<sub>3</sub>), 25.8 (3C, SiC(CH<sub>3</sub>)<sub>3</sub>), 18.2 (1C, SiC(CH<sub>3</sub>)<sub>3</sub>), -5.4 (1C, SiCH<sub>3</sub>), -5.5 (1C, SiCH<sub>3</sub>). IR (neat): 2954, 2930, 1727, 1472, 1369, 1256, 1155, 1110, 836, 777 cm<sup>-1</sup>. APCI-MS calcd for [C<sub>16</sub>H<sub>34</sub>IO<sub>4</sub>Si, M + H]<sup>+</sup>: 445.13, Found 445.13.

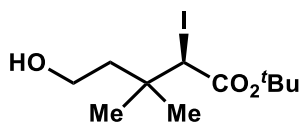

**(+)-*tert*-Butyl (*R*)-5-hydroxy-2-iodo-3,3-dimethylpentanoate, 6s:** Colorless semi-oil, TLC  $R_f = 0.45$  (Hexane/EtOAc = 5:1, v/v), 84% yield, 91% ee. HPLC conditions: Chiralcel AS-H column (25 cm × 0.46 cm ID), hexane/2-propanol = 90:10, 0.8 mL/min, 280 nm UV detector,  $t_R = 7.19$  min (minor) and  $t_R = 7.79$  min (major).  $[\alpha]_D^{24} +5.2$  ( $c$  0.70, CH<sub>2</sub>Cl<sub>2</sub>). <sup>1</sup>H NMR (500 MHz, CDCl<sub>3</sub>): δ 4.26 (s, 1H, CHI), 3.73 (t,  $J = 9.0$  Hz, 2H, OCH<sub>2</sub>), 1.84–1.70 (m, 2H, CH<sub>2</sub>), 1.55–1.49 (m, 1H, OH), 1.45 (s, 9H, C(CH<sub>3</sub>)<sub>3</sub>), 1.18 (s, 3H, CH<sub>3</sub>), 1.16 (s, 3H, CH<sub>3</sub>); <sup>13</sup>C NMR (100 MHz, CDCl<sub>3</sub>): δ 169.5 (1C, CO<sub>2</sub>C(CH<sub>3</sub>)<sub>3</sub>), 82.0 (1C, OC(CH<sub>3</sub>)<sub>3</sub>), 59.6 (1C, HOCH<sub>2</sub>), 42.1 (1C, CHI), 40.6 (1C, CH<sub>2</sub>), 35.8 (1C, C), 27.6 (3C, OC(CH<sub>3</sub>)<sub>3</sub>), 26.3 (1C, CH<sub>3</sub>), 24.5 (1C, CH<sub>3</sub>). IR (neat): 2971, 2932, 1731, 1369, 1254, 1159, 1129, 847 cm<sup>-1</sup>. APCI-MS calcd for [C<sub>11</sub>H<sub>22</sub>IO<sub>3</sub>, M + H]<sup>+</sup>: 329.06, Found 329.06.

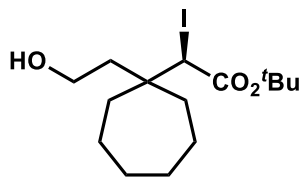

**(+)-tert-Butyl (R)-2-(1-(2-hydroxyethyl)cycloheptyl)-2-iodoacetate, 6v:** Colorless semi-oil, TLC  $R_f = 0.55$  (Hexane/EtOAc = 5:1, v/v), 56% yield, 91% ee. HPLC conditions: Chiralcel AS-H column (25 cm  $\times$  0.46 cm ID), hexane/2-propanol = 95:5, 0.4 mL/min, 280 nm UV detector,  $t_R = 24.36$  min (minor) and  $t_R = 25.32$  min (major).  $[\alpha]_D^{24} +2.4$  ( $c$  0.33,  $\text{CH}_2\text{Cl}_2$ ).  $^1\text{H NMR}$  (500 MHz,  $\text{CDCl}_3$ ):  $\delta$  4.42 (s, 1H, CHI), 3.80–3.70 (m, 2H,  $\text{OCH}_2$ ), 2.02–1.78 (m, 3H,  $\text{HOCH}_2\text{CH}_2$ ), 1.72–1.54 (m, 8H,  $4\text{CH}_2$ ), 1.50–1.44 (m, 13H,  $2\text{CH}_2 + \text{C}(\text{CH}_3)_3$ );  $^{13}\text{C NMR}$  (100 MHz,  $\text{CDCl}_3$ ):  $\delta$  169.7 (1C,  $\text{CO}_2\text{C}(\text{CH}_3)_3$ ), 82.0 (1C,  $\text{OC}(\text{CH}_3)_3$ ), 59.3 (1C,  $\text{HOCH}_2$ ), 42.0 (1C, CHI), 41.2 (1C, C), 40.8 (1C,  $\text{CH}_2$ ), 37.0 (1C,  $\text{CH}_2$ ), 35.5 (1C,  $\text{CH}_2$ ), 30.2 (1C,  $\text{CH}_2$ ), 30.1 (1C,  $\text{CH}_2$ ), 27.6 (3C,  $\text{OC}(\text{CH}_3)_3$ ), 23.7 (1C,  $\text{CH}_2$ ), 23.5 (1C,  $\text{CH}_2$ ). IR (neat): 2923, 2855, 1730, 1459, 1368, 1160, 1122, 1038, 847  $\text{cm}^{-1}$ . APCI-MS calcd for  $[\text{C}_{19}\text{H}_{24}\text{IO}_3, \text{M} + \text{H}]^+$ : 383.11, Found 383.11.

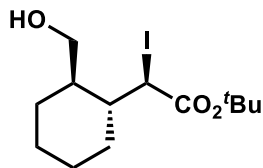

**(+)-tert-Butyl (2R)-2-((1R)-2-(hydroxymethyl)cyclohexyl)-2-iodoacetate, 6y:** Colorless semi-oil, TLC  $R_f = 0.45$  (Hexane/EtOAc = 5:1, v/v), 70% yield, 93% ee. HPLC conditions: Chiralcel AS-H column (25 cm  $\times$  0.46 cm ID), hexane/2-propanol = 90:10, 0.5 mL/min, 280 nm UV detector,  $t_R = 11.05$  min (major) and  $t_R = 13.20$  min (minor).  $[\alpha]_D^{24} +66.0$  ( $c$  0.20,  $\text{CH}_2\text{Cl}_2$ ).  $^1\text{H NMR}$  (500 MHz,  $\text{CDCl}_3$ ):  $\delta$  4.11 (d,  $J = 12.0$  Hz, 1H, CHI), 3.68–3.58 (m, 2H,  $\text{OCH}_2$ ), 2.24 (brs, 1H, OH), 2.08–1.98 (m, 2H, 2CH), 1.78–1.64 (m, 2H,  $\text{CH}_2$ ), 1.46 (s, 9H,  $\text{C}(\text{CH}_3)_3$ ), 1.46–1.12 (m, 6H,  $3\text{CH}_2$ );  $^{13}\text{C NMR}$  (100 MHz,  $\text{CDCl}_3$ ):  $\delta$  170.5 (1C,  $\text{CO}_2\text{C}(\text{CH}_3)_3$ ), 81.9 (1C,  $\text{OC}(\text{CH}_3)_3$ ), 60.2 (1C,  $\text{HOCH}_2$ ), 43.0 (1C,

CH), 39.7 (1C, CH), 32.1 (1C, CHI), 28.0 (1C, CH<sub>2</sub>), 27.6 (3C, OC(CH<sub>3</sub>)<sub>3</sub>), 26.1 (1C, CH<sub>2</sub>), 25.4 (1C, CH<sub>2</sub>), 20.3 (1C, CH<sub>2</sub>). IR (neat): 2929, 2856, 1727, 1368, 1252, 1159, 1130, 1033, 949, 848 cm<sup>-1</sup>. APCI-MS calcd for [C<sub>13</sub>H<sub>24</sub>IO<sub>3</sub>, M + H]<sup>+</sup>: 355.08, Found 355.08.

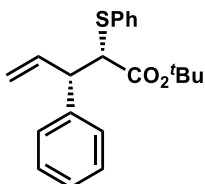

**(-)-tert-Butyl (2S, 3S)-3-phenyl-2-(phenylthio)pent-4-enoate, 7a:** Colorless semi-oil, TLC R<sub>f</sub> = 0.45 (Hexane/EtOAc = 30:1, v/v), 95% yield, *syn* / *anti* > 95 : 5, 97% ee. HPLC conditions: Chiralcel OD-H column (25 cm × 0.46 cm ID), hexane/2-propanol = 95:5, 0.5 mL/min, 210 nm UV detector, t<sub>R</sub> = 8.05 min (minor) and t<sub>R</sub> = 8.79 min (major). [α]<sub>D</sub><sup>24</sup> -18.2 (c 0.76, CH<sub>2</sub>Cl<sub>2</sub>). <sup>1</sup>H NMR (500 MHz, CDCl<sub>3</sub>): δ 7.35–7.20 (m, 10H, ArH), 6.08–5.98 (m, 1H, =CH), 5.17–5.07 (m, 2H, =CH<sub>2</sub>), 3.94 (d, J = 11.0 Hz, 1H, CHS), 3.77–3.71 (m, 1H, CH), 1.33 (s, 9H, C(CH<sub>3</sub>)<sub>3</sub>); <sup>13</sup>C NMR (100 MHz, CDCl<sub>3</sub>): δ 170.3 (1C, C=O), 140.0 (1C, ArC), 138.0 (1C, =CH), 133.8 (1C, ArC), 133.0 (2C, ArC), 128.6 (2C, ArC), 128.5 (2C, ArC), 128.3 (2C, ArC), 127.6 (1C, ArC), 127.1 (1C, ArC), 116.9 (1C, =CH<sub>2</sub>), 81.6 (1C, OC(CH<sub>3</sub>)<sub>3</sub>), 56.7 (1C, CHS), 52.0 (1C, CH), 27.8 (3C, OC(CH<sub>3</sub>)<sub>3</sub>). IR (neat): 2978, 2931, 1727, 1480, 1368, 1280, 1142, 921, 747, 699 cm<sup>-1</sup>. APCI-MS calcd for [C<sub>21</sub>H<sub>25</sub>O<sub>2</sub>S, M + H]<sup>+</sup>: 341.16, Found 341.16.

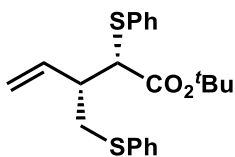

**(-)-tert-Butyl (2S, 3S)-2-(phenylthio)-3-((phenylthio)methyl)pent-4-enoate, 7q:** Colorless semi-oil, TLC R<sub>f</sub> = 0.40 (Hexane/EtOAc = 30:1, v/v), 94% yield, *syn* / *anti* = 94 : 6, 92% ee. HPLC conditions: Chiralcel AD-H column (25 cm × 0.46 cm ID),

hexane/2-propanol = 95:5, 0.5 mL/min, 210 nm UV detector,  $t_R = 10.19$  min (major) and  $t_R = 10.90$  min (minor).  $[\alpha]_D^{24} -31.0$  ( $c$  0.60,  $\text{CH}_2\text{Cl}_2$ ).  $^1\text{H}$  NMR (500 MHz,  $\text{CDCl}_3$ ):  $\delta$  7.46–7.42 (m, 2H, ArH), 7.35–7.30 (m, 2H, ArH), 7.29–7.25 (m, 5H, ArH), 7.20–7.16 (m, 1H, ArH), 5.84–5.74 (m, 1H, =CH), 5.22–5.14 (m, 2H, =CH<sub>2</sub>), 3.78 (d,  $J = 8.5$  Hz, 1H, CHS), 3.49 (dd,  $J_1 = 13.0$  Hz and  $J_2 = 4.5$  Hz, 1H, 1/2(CH<sub>2</sub>S)), 3.05 (dd,  $J_1 = 13.0$  Hz and  $J_2 = 3.5$  Hz, 1H, 1/2(CH<sub>2</sub>S)), 2.82–2.74 (m, 1H, CH), 1.34 (s, 9H, C(CH<sub>3</sub>)<sub>3</sub>);  $^{13}\text{C}$  NMR (100 MHz,  $\text{CDCl}_3$ ):  $\delta$  169.8 (1C, C=O), 136.1 (1C, =CH), 133.8 (1C, ArC), 132.5 (2C, ArC), 129.8 (1C, ArC), 129.5 (2C, ArC), 128.9 (4C, ArC), 127.7 (1C, ArC), 126.1 (1C, ArC), 119.0 (1C, =CH<sub>2</sub>), 81.8 (1C, OC(CH<sub>3</sub>)<sub>3</sub>), 55.3 (1C, CHS), 45.2 (1C, CH<sub>2</sub>S), 36.6 (1C, CH), 27.8 (3C, OC(CH<sub>3</sub>)<sub>3</sub>). IR (neat): 2976, 1725, 1480, 1438, 1367, 1282, 1140, 739, 690  $\text{cm}^{-1}$ . APCI-MS calcd for  $[\text{C}_{22}\text{H}_{27}\text{O}_2\text{S}_2, \text{M} + \text{H}]^+$ : 387.14, Found 387.13.

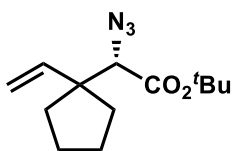

**(-)-tert-Butyl (S)-2-azido-2-(1-vinylcyclopentyl)acetate, 8t:** Colorless semi-oil, TLC  $R_f = 0.60$  (Hexane/EtOAc = 30:1, v/v), 88% yield, 92% ee (ee value was determined by transformation to compound **S11t**).  $[\alpha]_D^{24} -42.0$  ( $c$  0.13,  $\text{CH}_2\text{Cl}_2$ ).  $^1\text{H}$  NMR (500 MHz,  $\text{CDCl}_3$ ):  $\delta$  5.83 (dd,  $J_1 = 17.5$  Hz and  $J_2 = 10.5$  Hz, 1H, CH=), 5.16 (d,  $J = 10.5$  Hz, 1H, 1/2(=CH<sub>2</sub>)), 5.09 (d,  $J = 17.5$  Hz, 1H, 1/2(=CH<sub>2</sub>)), 3.69 (s, 1H, CHN<sub>3</sub>), 1.87–1.82 (m, 1H, 1/2CH<sub>2</sub>), 1.75–1.72 (m, 1H, 1/2CH<sub>2</sub>), 1.69–1.58 (m, 6H, 3CH<sub>2</sub>), 1.49 (s, 9H, C(CH<sub>3</sub>)<sub>3</sub>);  $^{13}\text{C}$  NMR (100 MHz,  $\text{CDCl}_3$ ):  $\delta$  168.0 (1C, C=O), 140.2 (1C, CH=), 114.9 (1C, =CH<sub>2</sub>), 82.8 (1C, OC(CH<sub>3</sub>)<sub>3</sub>), 70.1 (1C, CHN<sub>3</sub>), 52.9 (1C, C), 34.6 (1C, CH<sub>2</sub>), 34.5 (1C, CH<sub>2</sub>), 28.1 (3C, OC(CH<sub>3</sub>)<sub>3</sub>), 23.6 (1C, CH<sub>2</sub>), 23.2 (1C, CH<sub>2</sub>). IR (neat): 2979, 2933, 2107, 1727, 1673, 1618, 1369, 1304, 1252, 1143, 846, 784  $\text{cm}^{-1}$ . APCI-MS calcd for  $[\text{C}_{13}\text{H}_{22}\text{N}_3\text{O}_2, \text{M} + \text{H}]^+$ : 252.17, Found 252.18.

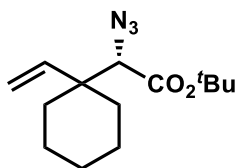

**(-)-tert-Butyl (S)-2-azido-2-(1-vinylcyclohexyl)acetate, 8u:** Colorless semi-oil, TLC  $R_f = 0.75$  (Hexane/EtOAc = 30:1, v/v), 92% yield, 85% ee (ee value was determined by transformation to compound **S11u**).  $[\alpha]_D^{24} -34.0$  ( $c$  0.20,  $\text{CH}_2\text{Cl}_2$ ).  $^1\text{H}$  NMR (500 MHz,  $\text{CDCl}_3$ ):  $\delta$  5.68 (dd,  $J_1 = 17.5$  Hz and  $J_2 = 11.0$  Hz, 1H, CH=), 5.29 (d,  $J = 11.0$  Hz, 1H,  $1/2(=\text{CH}_2)$ ), 5.12 (dd,  $J = 18.0$  Hz, 1H,  $1/2(=\text{CH}_2)$ ), 3.64 (s, 1H,  $\text{CHN}_3$ ), 1.70–1.40 (m, 10H, 5 $\text{CH}_2$ ), 1.49 (s, 9H,  $\text{C}(\text{CH}_3)_3$ );  $^{13}\text{C}$  NMR (100 MHz,  $\text{CDCl}_3$ ):  $\delta$  167.6 (1C, C=O), 140.4 (1C, CH=), 116.9 (1C, = $\text{CH}_2$ ), 82.7 (1C,  $\text{OC}(\text{CH}_3)_3$ ), 70.2 (1C,  $\text{CHN}_3$ ), 44.1 (1C, C), 32.8 (1C,  $\text{CH}_2$ ), 32.3 (1C,  $\text{CH}_2$ ), 28.1 (3C,  $\text{OC}(\text{CH}_3)_3$ ), 26.0 (1C,  $\text{CH}_2$ ), 21.8 (2C, 2 $\text{CH}_2$ ). IR (neat): 2930, 2852, 2106, 1733, 1369, 1259, 1152, 920, 844, 668  $\text{cm}^{-1}$ . APCI-MS calcd for  $[\text{C}_{14}\text{H}_{24}\text{N}_3\text{O}_2, \text{M} + \text{H}]^+$ : 266.19, Found 266.20.

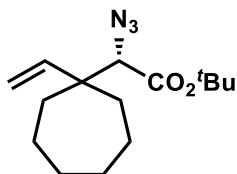

**(-)-tert-Butyl (S)-2-azido-2-(1-vinylcycloheptyl)acetate, 8v:** Colorless semi-oil, TLC  $R_f = 0.75$  (Hexane/EtOAc = 30:1, v/v), 90% yield, 91% ee (ee value was determined by transformation to compound **S11v**).  $[\alpha]_D^{24} -22.0$  ( $c$  0.40,  $\text{CH}_2\text{Cl}_2$ ).  $^1\text{H}$  NMR (400 MHz,  $\text{CDCl}_3$ ):  $\delta$  5.80 (dd,  $J_1 = 17.6$  Hz and  $J_2 = 10.8$  Hz, 1H, CH=), 5.18 (dd,  $J_1 = 10.8$  Hz and  $J_2 = 0.8$  Hz, 1H,  $1/2(=\text{CH}_2)$ ), 5.09 (dd,  $J_1 = 17.6$  Hz and  $J_2 = 0.8$  Hz, 1H,  $1/2(=\text{CH}_2)$ ), 3.61 (s, 1H,  $\text{CHN}_3$ ), 1.84–1.66 (m, 4H, 2 $\text{CH}_2$ ), 1.60–1.52 (m, 4H, 2 $\text{CH}_2$ ), 1.49 (s, 9H,  $\text{C}(\text{CH}_3)_3$ ), 1.48–1.43 (m, 4H, 2 $\text{CH}_2$ );  $^{13}\text{C}$  NMR (100 MHz,  $\text{CDCl}_3$ ):  $\delta$  167.8 (1C, C=O), 142.1 (1C, CH=), 114.7 (1C, = $\text{CH}_2$ ), 82.8 (1C,  $\text{OC}(\text{CH}_3)_3$ ), 70.4 (1C,  $\text{CHN}_3$ ), 47.1 (1C, C), 34.7 (1C,  $\text{CH}_2$ ), 34.0 (1C,  $\text{CH}_2$ ), 30.1 (1C,  $\text{CH}_2$ ), 30.0 (1C,  $\text{CH}_2$ ), 28.1 (3C,  $\text{OC}(\text{CH}_3)_3$ ), 22.5 (1C,  $\text{CH}_2$ ), 22.4 (2C, 2 $\text{CH}_2$ ). IR (neat): 2926, 2857, 2106, 1733, 1369,

1258, 1150, 918, 845, 668  $\text{cm}^{-1}$ . APCI-MS calcd for  $[\text{C}_{15}\text{H}_{26}\text{N}_3\text{O}_2, \text{M} + \text{H}]^+$ : 280.20, Found 280.20.

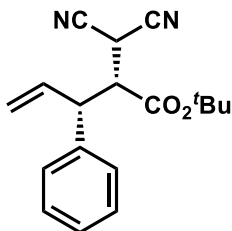

**(+)-*tert*-Butyl (2*R*, 3*R*)-2-(dicyanomethyl)-3-phenylpent-4-enoate, 9a:** White solid, mp: 115–116 °C, TLC  $R_f = 0.45$  (Hexane/EtOAc = 10:1, v/v), 74% yield, 96% ee. HPLC conditions: Chiralcel AD-H column (25 cm  $\times$  0.46 cm ID), hexane/2-propanol = 90:10, 0.8 mL/min, 210 nm UV detector,  $t_R = 6.79$  min (major) and  $t_R = 7.70$  min (minor).  $[\alpha]_D^{24} +24.0$  ( $c$  0.30,  $\text{CH}_2\text{Cl}_2$ ).  $^1\text{H}$  NMR (500 MHz,  $\text{CDCl}_3$ ):  $\delta$  7.42–7.36 (m, 2H, ArH), 7.35–7.30 (m, 1H, ArH), 7.28–7.24 (m, 2H, ArH), 6.10–6.00 (m, 1H, =CH), 5.30–5.20 (m, 2H, =CH<sub>2</sub>), 3.79 (t,  $J = 9.5$  Hz, 1H, ArCH), 3.53 (d,  $J = 6.0$  Hz, 1H, CH(CN)<sub>2</sub>), 3.16 (dd,  $J_1 = 10.0$  Hz and  $J_2 = 6.0$  Hz, 1H, CH), 1.48 (s, 9H, C(CH<sub>3</sub>)<sub>3</sub>);  $^{13}\text{C}$  NMR (100 MHz,  $\text{CDCl}_3$ ):  $\delta$  167.2 (1C, C=O), 138.1 (1C, ArC), 135.4 (1C, =CH), 129.6 (2C, ArC), 128.3 (1C, ArC), 127.6 (2C, ArC), 118.9 (1C, =CH<sub>2</sub>), 111.3 (1C, CN), 110.6 (1C, CN), 84.3 (1C, OC(CH<sub>3</sub>)<sub>3</sub>), 51.4 (1C, CH), 50.4 (1C, CH), 27.8 (3C, OC(CH<sub>3</sub>)<sub>3</sub>), 24.1 (1C, CH(CN)<sub>2</sub>). IR (neat): 2983, 2906, 2256, 1716, 1370, 1250, 1151, 931, 704  $\text{cm}^{-1}$ . APCI-MS calcd for  $[\text{C}_{18}\text{H}_{21}\text{N}_2\text{O}_2, \text{M} + \text{H}]^+$ : 297.16, Found 297.16.

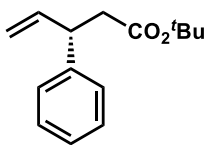

**(+)-*tert*-Butyl (S)-3-phenylpent-4-enoate, 10a:** Colorless semi-oil, TLC  $R_f = 0.55$  (Hexane/EtOAc = 30:1, v/v), 85% yield, 93% ee. HPLC conditions: Chiralcel OJ-H column (25 cm  $\times$  0.46 cm ID), hexane/2-propanol = 90:10, 0.5 mL/min, 210 nm UV detector,  $t_R = 9.54$  min (minor) and  $t_R = 11.30$  min (major).  $[\alpha]_D^{24} +2.4$  ( $c$  0.33,  $\text{CH}_2\text{Cl}_2$ ).

$^1\text{H}$  NMR (500 MHz,  $\text{CDCl}_3$ ):  $\delta$  7.32–7.27 (m, 2H, ArH), 7.23–7.18 (m, 3H, ArH), 6.02–5.92 (m, 1H, =CH), 5.09–5.03 (m, 2H, =CH<sub>2</sub>), 3.81 (q,  $J$  = 7.5 Hz, 1H, CH), 2.70–2.58 (m, 2H, CH<sub>2</sub>), 1.35 (s, 9H, C(CH<sub>3</sub>)<sub>3</sub>);  $^{13}\text{C}$  NMR (100 MHz,  $\text{CDCl}_3$ ):  $\delta$  171.2 (1C, C=O), 142.5 (1C, ArC), 140.5 (1C, =CH), 128.4 (2C, ArC), 127.6 (2C, ArC), 126.5 (1C, ArC), 114.5 (1C, =CH<sub>2</sub>), 80.4 (1C, OC(CH<sub>3</sub>)<sub>3</sub>), 45.9 (1C, CH), 41.4 (1C, CH<sub>2</sub>), 28.0 (3C, OC(CH<sub>3</sub>)<sub>3</sub>). IR (neat): 2978, 1729, 1367, 1257, 1148, 917, 754, 700  $\text{cm}^{-1}$ . APCI-MS calcd for  $[\text{C}_{15}\text{H}_{21}\text{O}_2, \text{M} + \text{H}]^+$ : 233.15, Found 233.15.

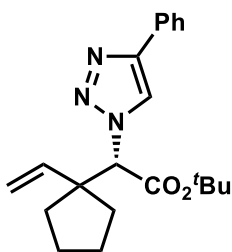

**(+)-tert-Butyl (S)-2-(4-phenyl-1H-1,2,3-triazol-1-yl)-2-(1-vinylcyclopentyl)acetate, S11t:** Colorless semi-oil, TLC  $R_f$  = 0.50 (Hexane/EtOAc = 8:1, v/v), 86% yield, 92% ee. HPLC conditions: Chiralcel AD-H column (25 cm  $\times$  0.46 cm ID), hexane/2-propanol = 95:5, 0.8 mL/min, 254 nm UV detector,  $t_R$  = 14.69 min (minor) and  $t_R$  = 15.39 min (major).  $[\alpha]_D^{24}$  +22.0 ( $c$  0.30,  $\text{CH}_2\text{Cl}_2$ ).  $^1\text{H}$  NMR (500 MHz,  $\text{CDCl}_3$ ):  $\delta$  8.18 (s, 1H, NCH=), 7.88–7.80 (m, 2H, ArH), 7.42 (t,  $J$  = 7.5 Hz, 2H, ArH), 7.32 (t,  $J$  = 7.5 Hz, 1H, ArH), 5.90 (dd,  $J_1$  = 17.5 Hz and  $J_2$  = 10.5 Hz, 1H, CH=), 5.38 (s, 1H, CHN), 5.30 (d,  $J$  = 11.0 Hz, 1H, 1/2(=CH<sub>2</sub>)), 5.03 (d,  $J$  = 17.5 Hz, 1H, 1/2(=CH<sub>2</sub>)), 1.94–1.83 (m, 2H, CH<sub>2</sub>), 1.77–1.70 (m, 1H, 1/2CH<sub>2</sub>), 1.68–1.64 (m, 1H, 1/2CH<sub>2</sub>), 1.58–1.40 (m, 13H, 2CH<sub>2</sub> + C(CH<sub>3</sub>)<sub>3</sub>);  $^{13}\text{C}$  NMR (100 MHz,  $\text{CDCl}_3$ ):  $\delta$  166.7 (1C, C=O), 147.0 (1C, =C), 138.9 (1C, CH=), 130.8 (1C, ArC), 128.7 (2C, ArC), 127.9 (1C, NCH=), 125.7 (2C, ArC), 120.2 (1C, ArC), 116.8 (1C, =CH<sub>2</sub>), 83.5 (1C, OC(CH<sub>3</sub>)<sub>3</sub>), 70.5 (1C, CHN), 53.2 (1C, C), 36.5 (1C, CH<sub>2</sub>), 33.2 (1C, CH<sub>2</sub>), 28.0 (3C, OC(CH<sub>3</sub>)<sub>3</sub>), 23.3 (1C, CH<sub>2</sub>), 22.5 (1C, CH<sub>2</sub>). IR (neat): 2972, 1736, 1369, 1240, 1154, 1074, 1041, 922, 866  $\text{cm}^{-1}$ . APCI-MS calcd for  $[\text{C}_{21}\text{H}_{28}\text{N}_3\text{O}_2, \text{M} + \text{H}]^+$ : 354.22, Found 354.22.



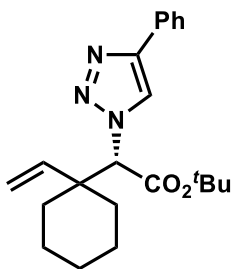

(+)-*tert*-Butyl (S)-2-(4-phenyl-1*H*-1,2,3-triazol-1-yl)-2-(1-vinylcyclohexyl)acetate,

**S11u**: Colorless semi-oil, TLC  $R_f = 0.55$  (Hexane/EtOAc = 8:1, v/v), 90% yield, 85% ee.

HPLC conditions: Chiralcel AD-H column (25 cm  $\times$  0.46 cm ID), hexane/2-propanol = 90:10, 0.8 mL/min, 254 nm UV detector,  $t_R = 7.39$  min (major) and  $t_R = 9.46$  min (minor).

$[\alpha]_D^{24} +19.0$  ( $c$  0.20,  $\text{CH}_2\text{Cl}_2$ ).  $^1\text{H}$  NMR (500 MHz,  $\text{CDCl}_3$ ):  $\delta$  8.20 (s, 1H, NCH=), 7.87–7.82 (m, 2H, ArH), 7.42 (t,  $J = 7.5$  Hz, 2H, ArH), 7.32 (t,  $J = 7.5$  Hz, 1H, ArH), 5.76 (dd,  $J_1 = 17.5$  Hz and  $J_2 = 11.0$  Hz, 1H, CH=), 5.47 (brs, 1H, CHN), 5.40 (d,  $J = 11.0$  Hz, 1H, 1/2(=CH<sub>2</sub>)), 4.98 (d,  $J = 18.0$  Hz, 1H, 1/2(=CH<sub>2</sub>)), 1.82–1.62 (m, 4H, 2CH<sub>2</sub>), 1.52–1.46 (m, 11H, CH<sub>2</sub> + C(CH<sub>3</sub>)<sub>3</sub>), 1.42–1.27 (m, 4H, 2CH<sub>2</sub>);  $^{13}\text{C}$  NMR (100 MHz,  $\text{CDCl}_3$ ):  $\delta$  166.6 (1C, C=O), 146.8 (1C, =C), 139.7 (1C, CH=), 130.8 (1C, ArC), 128.8 (2C, ArC), 127.9 (1C, NCH=), 125.6 (2C, ArC), 120.5 (1C, ArC), 118.3 (1C, =CH<sub>2</sub>), 83.5 (1C, OC(CH<sub>3</sub>)<sub>3</sub>), 70.2 (1C, CHN), 44.2 (1C, C), 34.5 (1C, CH<sub>2</sub>), 31.5 (1C, CH<sub>2</sub>), 28.0 (3C, OC(CH<sub>3</sub>)<sub>3</sub>), 25.7 (1C, CH<sub>2</sub>), 21.8 (1C, CH<sub>2</sub>), 21.4 (1C, CH<sub>2</sub>). IR (neat): 2934, 2857, 1735, 1458, 1369, 1153, 1073, 1042, 765, 694  $\text{cm}^{-1}$ . APCI-MS calcd for  $[\text{C}_{22}\text{H}_{30}\text{N}_3\text{O}_2, \text{M} + \text{H}]^+$ : 368.23, Found 368.23.

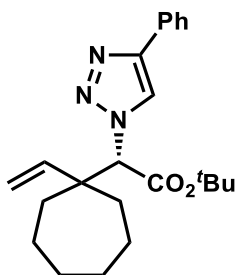

(+)-*tert*-Butyl (S)-2-(4-phenyl-1*H*-1,2,3-triazol-1-yl)-2-(1-vinylcycloheptyl)acetate,

**S11v**: Colorless semi-oil, TLC  $R_f = 0.60$  (Hexane/EtOAc = 8:1, v/v), 88% yield, 91% ee.

HPLC conditions: Chiralcel AD-H column (25 cm × 0.46 cm ID), hexane/2-propanol = 90:10, 0.8 mL/min, 254 nm UV detector,  $t_R$  = 7.21 min (major) and  $t_R$  = 9.34 min (minor).  $[\alpha]_D^{24}$  +13.0 ( $c$  0.40, CH<sub>2</sub>Cl<sub>2</sub>). <sup>1</sup>H NMR (500 MHz, CDCl<sub>3</sub>): δ 8.21 (s, 1H, NCH=), 7.84 (d,  $J$  = 8.0 Hz, 2H, ArH), 7.42 (t,  $J$  = 8.0 Hz, 2H, ArH), 7.32 (t,  $J$  = 7.5 Hz, 1H, ArH), 5.89 (dd,  $J_1$  = 17.5 Hz and  $J_2$  = 11.0 Hz, 1H, CH=), 5.38 (s, 1H, CHN), 5.29 (d,  $J$  = 11.0 Hz, 1H, 1/2(=CH<sub>2</sub>)), 4.97 (d,  $J$  = 17.5 Hz, 1H, 1/2(=CH<sub>2</sub>)), 1.95–1.88 (m, 1H, 1/2CH<sub>2</sub>), 1.77–1.71 (m, 1H, 1/2CH<sub>2</sub>), 1.56–1.38 (m, 19H, 5CH<sub>2</sub> + C(CH<sub>3</sub>)<sub>3</sub>); <sup>13</sup>C NMR (100 MHz, CDCl<sub>3</sub>): δ 166.8 (1C, C=O), 146.8 (1C, =C), 141.1 (1C, CH=), 130.8 (1C, ArC), 128.7 (2C, ArC), 127.9 (1C, NCH=), 125.6 (2C, ArC), 120.5 (1C, ArC), 116.2 (1C, =CH<sub>2</sub>), 83.5 (1C, OC(CH<sub>3</sub>)<sub>3</sub>), 70.4 (1C, CHN), 47.5 (1C, C), 36.0 (1C, CH<sub>2</sub>), 32.7 (1C, CH<sub>2</sub>), 30.2 (1C, CH<sub>2</sub>), 30.1 (1C, CH<sub>2</sub>), 28.0 (3C, OC(CH<sub>3</sub>)<sub>3</sub>), 22.1 (1C, CH<sub>2</sub>), 22.0 (1C, CH<sub>2</sub>). IR (neat): 2928, 2857, 1735, 1462, 1369, 1238, 1152, 1073, 1041, 922, 764, 695 cm<sup>-1</sup>. APCI-MS calcd for [C<sub>23</sub>H<sub>32</sub>N<sub>3</sub>O<sub>2</sub>, M + H]<sup>+</sup>: 382.25, Found 382.25.

## 9. X-Ray Diffraction Analysis of (2*R*, 3*S*)-**6i**

A sample of (2*R*, 3*S*)-**6i** was recrystallized from 10:1 Hexane:Et<sub>2</sub>O (slow evaporation). The resulting crystals were suitable for X-ray diffraction and the structure was solved. This structure allowed the assignment of absolute configuration as shown. The relative configurations of all other [2,3]-rearrangement products were assigned by analogy. We thank Dr. Vincent Lynch (Manager of the X-ray Diffraction Lab at UT Austin) for the X-ray structural analysis. The CIF file is available as a separate file in the Supporting Information.

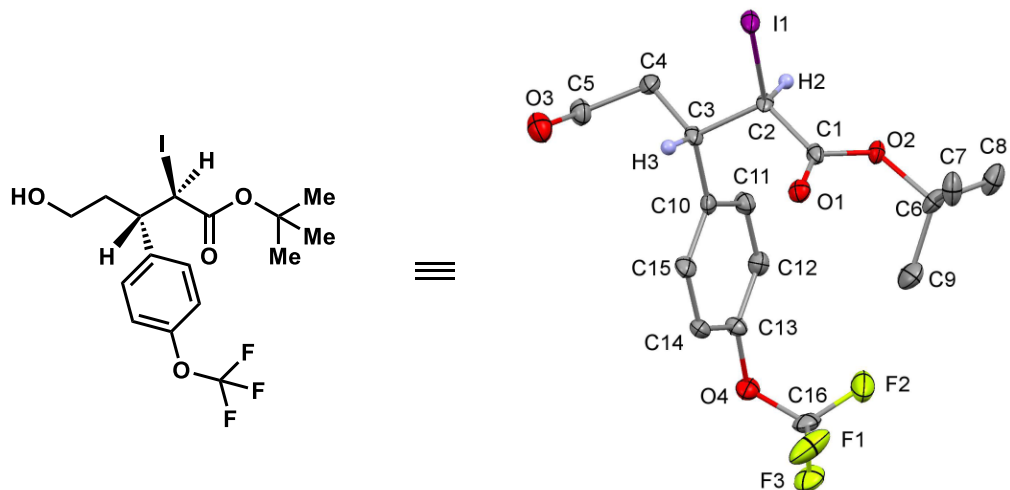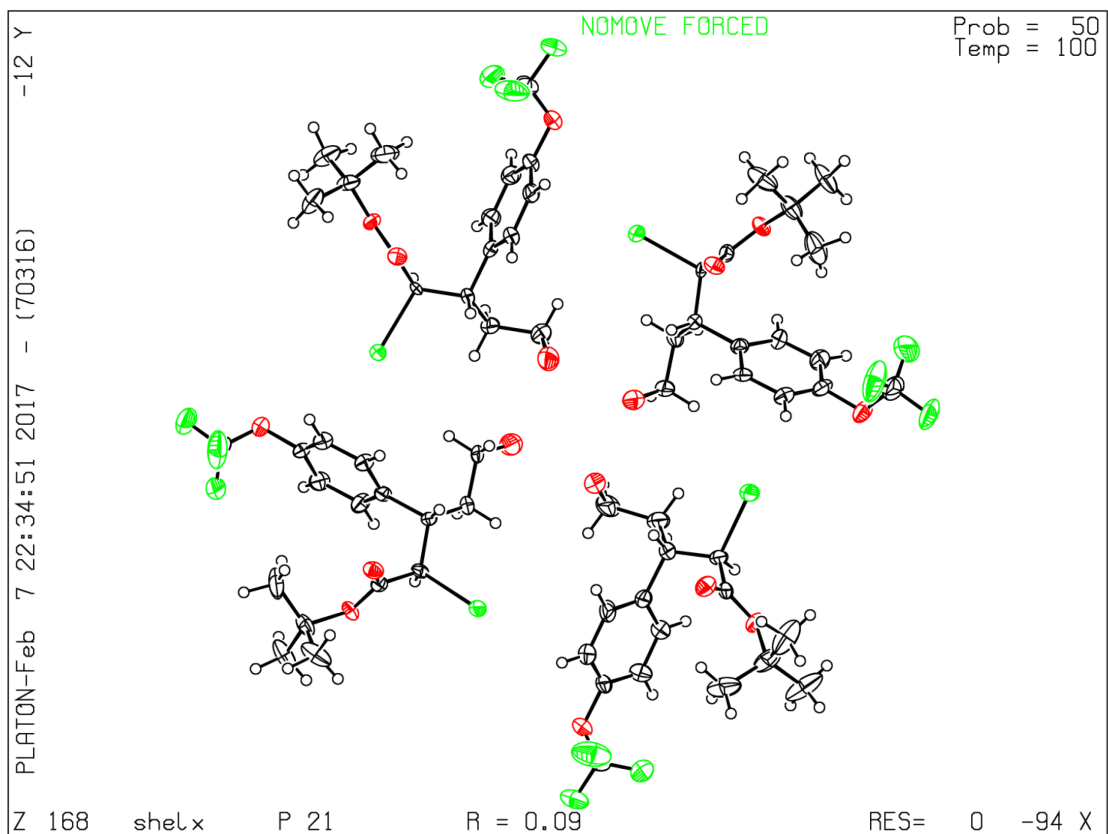

**Table 1.** Crystal data and structure refinement for 1.

|                   |                 |
|-------------------|-----------------|
| Empirical formula | C16 H20 F3 I O4 |
| Formula weight    | 460.22          |
| Temperature       | 100(2) K        |
| Wavelength        | 1.54184 Å       |
| Crystal system    | monoclinic      |

|                                   |                                             |                               |
|-----------------------------------|---------------------------------------------|-------------------------------|
| Space group                       | P 21                                        |                               |
| Unit cell dimensions              | a = 26.5393(4) Å                            | $\alpha = 90^\circ$ .         |
|                                   | b = 5.50860(10) Å                           | $\beta = 90.6680(10)^\circ$ . |
|                                   | c = 26.7258(4) Å                            | $\gamma = 90^\circ$ .         |
| Volume                            | 3906.90(11) Å <sup>3</sup>                  |                               |
| Z                                 | 8                                           |                               |
| Density (calculated)              | 1.565 Mg/m <sup>3</sup>                     |                               |
| Absorption coefficient            | 13.281 mm <sup>-1</sup>                     |                               |
| F(000)                            | 1824                                        |                               |
| Crystal size                      | 0.180 x 0.060 x 0.050 mm <sup>3</sup>       |                               |
| Theta range for data collection   | 2.333 to 76.039°.                           |                               |
| Index ranges                      | -32 ≤ h ≤ 33, -6 ≤ k ≤ 6, -33 ≤ l ≤ 33      |                               |
| Reflections collected             | 66438                                       |                               |
| Independent reflections           | 15936 [R(int) = 0.1101]                     |                               |
| Completeness to theta = 67.684°   | 100.0 %                                     |                               |
| Absorption correction             | Gaussian and multi-scan                     |                               |
| Max. and min. transmission        | 1.00 and 0.348                              |                               |
| Refinement method                 | Full-matrix least-squares on F <sup>2</sup> |                               |
| Data / restraints / parameters    | 15936 / 1 / 877                             |                               |
| Goodness-of-fit on F <sup>2</sup> | 1.048                                       |                               |
| Final R indices [I > 2σ(I)]       | R1 = 0.0918, wR2 = 0.2359                   |                               |
| R indices (all data)              | R1 = 0.0996, wR2 = 0.2476                   |                               |
| Absolute structure parameter      | -0.025(8)                                   |                               |
| Extinction coefficient            | n/a                                         |                               |
| Largest diff. peak and hole       | 5.911 and -1.237 e.Å <sup>-3</sup>          |                               |

**Table 2.** Atomic coordinates ( $\times 10^4$ ) and equivalent isotropic displacement parameters ( $\text{\AA}^2 \times 10^3$ ) for 1.  $U(\text{eq})$  is defined as one third of the trace of the orthogonalized  $U^{ij}$  tensor.

|    | x       | y        | z       | U(eq) |
|----|---------|----------|---------|-------|
| C1 | 8898(5) | 6040(30) | 9619(5) | 28(3) |
| C2 | 8815(4) | 4110(30) | 9230(4) | 24(2) |
| C3 | 8267(4) | 4050(30) | 9027(5) | 28(3) |
| C4 | 8184(5) | 1770(30) | 8702(5) | 35(3) |
| C5 | 7655(6) | 1440(30) | 8504(5) | 39(3) |

|     |          |           |          |       |
|-----|----------|-----------|----------|-------|
| C6  | 9222(6)  | 6770(30)  | 10471(5) | 36(3) |
| C7  | 9561(7)  | 8760(30)  | 10325(6) | 46(4) |
| C8  | 9484(8)  | 5000(40)  | 10833(6) | 49(4) |
| C9  | 8722(8)  | 7640(50)  | 10677(6) | 57(5) |
| C10 | 7912(5)  | 4080(30)  | 9482(5)  | 29(3) |
| C11 | 7929(5)  | 2280(30)  | 9840(5)  | 33(3) |
| C12 | 7619(5)  | 2320(30)  | 10248(5) | 33(3) |
| C13 | 7288(5)  | 4240(30)  | 10302(5) | 27(3) |
| C14 | 7263(5)  | 6070(30)  | 9951(5)  | 32(3) |
| C15 | 7574(5)  | 5970(30)  | 9538(5)  | 35(3) |
| C16 | 7115(7)  | 5380(40)  | 11122(6) | 44(4) |
| C17 | 5334(5)  | 3850(30)  | 8895(5)  | 25(2) |
| C18 | 5734(4)  | 1930(20)  | 8808(4)  | 21(2) |
| C19 | 5918(5)  | 1890(30)  | 8270(4)  | 27(3) |
| C20 | 6265(5)  | -310(30)  | 8183(5)  | 35(3) |
| C21 | 6486(6)  | -390(30)  | 7666(5)  | 36(3) |
| C22 | 4492(6)  | 4600(30)  | 9217(7)  | 40(4) |
| C23 | 4659(8)  | 6600(30)  | 9560(8)  | 53(5) |
| C24 | 4130(6)  | 2890(40)  | 9473(8)  | 56(5) |
| C25 | 4269(7)  | 5400(40)  | 8721(9)  | 62(6) |
| C26 | 5469(5)  | 1930(30)  | 7905(5)  | 27(3) |
| C27 | 5106(5)  | 120(30)   | 7918(5)  | 32(3) |
| C28 | 4697(6)  | 140(30)   | 7603(5)  | 38(3) |
| C29 | 4638(6)  | 2100(30)  | 7271(5)  | 34(3) |
| C30 | 4994(5)  | 3870(30)  | 7243(5)  | 30(3) |
| C31 | 5409(5)  | 3820(30)  | 7565(4)  | 30(3) |
| C32 | 3807(7)  | 3190(50)  | 7084(7)  | 57(5) |
| C33 | 6116(5)  | 2160(30)  | 5331(5)  | 31(3) |
| C34 | 6213(5)  | 210(30)   | 5731(4)  | 32(3) |
| C35 | 6759(5)  | 360(30)   | 5917(5)  | 37(3) |
| C36 | 6888(6)  | -1640(40) | 6289(5)  | 48(5) |
| C37 | 7389(6)  | -1140(50) | 6558(7)  | 57(5) |
| C38 | 5777(8)  | 2700(30)  | 4485(6)  | 50(4) |
| C39 | 6267(10) | 3590(40)  | 4283(7)  | 64(6) |
| C40 | 5427(9)  | 4720(40)  | 4653(10) | 73(7) |

|     |          |           |          |       |
|-----|----------|-----------|----------|-------|
| C41 | 5503(11) | 1000(40)  | 4143(7)  | 78(8) |
| C42 | 7124(5)  | 290(30)   | 5464(5)  | 33(3) |
| C43 | 7088(5)  | -1670(30) | 5125(5)  | 36(3) |
| C44 | 7396(6)  | -1680(30) | 4714(6)  | 42(4) |
| C45 | 7742(5)  | 150(30)   | 4650(5)  | 35(3) |
| C46 | 7780(6)  | 2040(30)  | 4974(6)  | 39(3) |
| C47 | 7463(5)  | 2070(30)  | 5386(6)  | 41(4) |
| C48 | 7919(8)  | 1090(50)  | 3814(6)  | 57(5) |
| C49 | 9601(5)  | 9160(20)  | 6087(4)  | 23(2) |
| C50 | 9212(4)  | 7210(20)  | 6163(4)  | 21(2) |
| C51 | 9007(5)  | 7210(30)  | 6699(4)  | 25(3) |
| C52 | 8661(5)  | 5000(30)  | 6788(5)  | 34(3) |
| C53 | 8438(5)  | 5080(40)  | 7310(5)  | 41(4) |
| C54 | 10469(5) | 9880(30)  | 5808(6)  | 36(3) |
| C55 | 10837(6) | 8150(30)  | 5561(9)  | 55(5) |
| C56 | 10318(8) | 11850(30) | 5439(8)  | 54(5) |
| C57 | 10663(6) | 10740(50) | 6304(9)  | 60(6) |
| C58 | 9461(5)  | 7250(20)  | 7070(4)  | 24(3) |
| C59 | 9519(5)  | 9090(30)  | 7418(5)  | 32(3) |
| C60 | 9931(6)  | 9060(30)  | 7744(5)  | 34(3) |
| C61 | 10270(5) | 7220(30)  | 7721(5)  | 33(3) |
| C62 | 10224(6) | 5310(30)  | 7382(5)  | 34(3) |
| C63 | 9816(5)  | 5290(30)  | 7054(5)  | 33(3) |
| C64 | 11102(7) | 8230(50)  | 7929(6)  | 54(5) |
| I1  | 9328(1)  | 4987(2)   | 8623(1)  | 35(1) |
| I2  | 6337(1)  | 2708(3)   | 9331(1)  | 39(1) |
| I3  | 5703(1)  | 1033(3)   | 6337(1)  | 44(1) |
| I4  | 8623(1)  | 7941(2)   | 5620(1)  | 35(1) |
| O1  | 8775(4)  | 8140(20)  | 9551(3)  | 31(2) |
| O2  | 9119(3)  | 5140(20)  | 10028(3) | 28(2) |
| O3  | 7537(5)  | 3400(30)  | 8189(5)  | 50(3) |
| O4  | 6954(4)  | 4280(20)  | 10707(4) | 37(2) |
| O5  | 5400(4)  | 5933(19)  | 8760(4)  | 29(2) |
| O6  | 4935(3)  | 2990(20)  | 9115(3)  | 28(2) |
| O7  | 6753(4)  | 1850(30)  | 7580(4)  | 49(3) |

|     |          |           |          |       |
|-----|----------|-----------|----------|-------|
| O8  | 4241(4)  | 2090(20)  | 6924(4)  | 39(3) |
| O9  | 6233(4)  | 4220(20)  | 5390(4)  | 36(2) |
| O10 | 5896(4)  | 1200(20)  | 4937(3)  | 33(2) |
| O11 | 7378(5)  | 1250(40)  | 6792(5)  | 72(5) |
| O12 | 8077(4)  | -30(30)   | 4242(4)  | 43(3) |
| O13 | 9542(4)  | 11236(18) | 6215(3)  | 29(2) |
| O14 | 10016(3) | 8259(17)  | 5883(3)  | 26(2) |
| O15 | 8146(5)  | 2940(30)  | 7370(4)  | 61(4) |
| O16 | 10678(4) | 7110(20)  | 8068(4)  | 38(2) |
| F1  | 7185(6)  | 7760(30)  | 11058(4) | 80(5) |
| F2  | 7526(5)  | 4470(40)  | 11310(4) | 86(6) |
| F3  | 6757(4)  | 5150(30)  | 11467(4) | 57(3) |
| F4  | 3889(5)  | 5590(30)  | 7164(7)  | 89(6) |
| F5  | 3626(5)  | 2160(40)  | 7490(5)  | 94(7) |
| F6  | 3471(4)  | 3030(30)  | 6727(5)  | 67(3) |
| F7  | 7501(5)  | 150(50)   | 3636(4)  | 98(7) |
| F8  | 7875(7)  | 3460(30)  | 3879(5)  | 86(5) |
| F9  | 8280(5)  | 670(30)   | 3481(4)  | 74(5) |
| F10 | 11042(5) | 10620(30) | 7868(7)  | 83(5) |
| F11 | 11449(4) | 7930(30)  | 8286(4)  | 63(3) |
| F12 | 11289(4) | 7320(40)  | 7512(4)  | 91(7) |

---

## 10. References

- [1] B. Xu, U. K. Tambar, *J. Am. Chem. Soc.* **2016**, *138*, 12073–12076.  
 [2] P. Szcześniak, M. Pieczykolan, S. Stecko, *J. Org. Chem.* **2016**, *81*, 1057–1074.

# 11. NMR Spectra

## (Z)-1-(4-(3-iodoprop-1-en-1-yl)phenyl)ethan-1-one, 1e

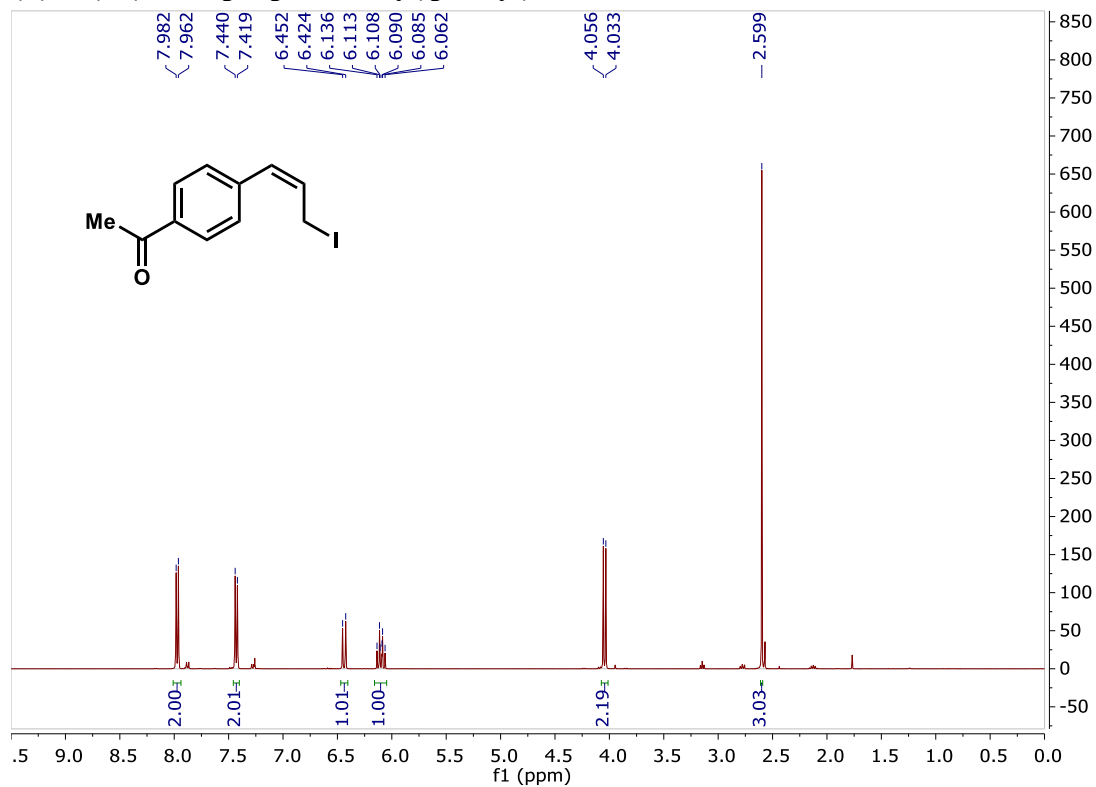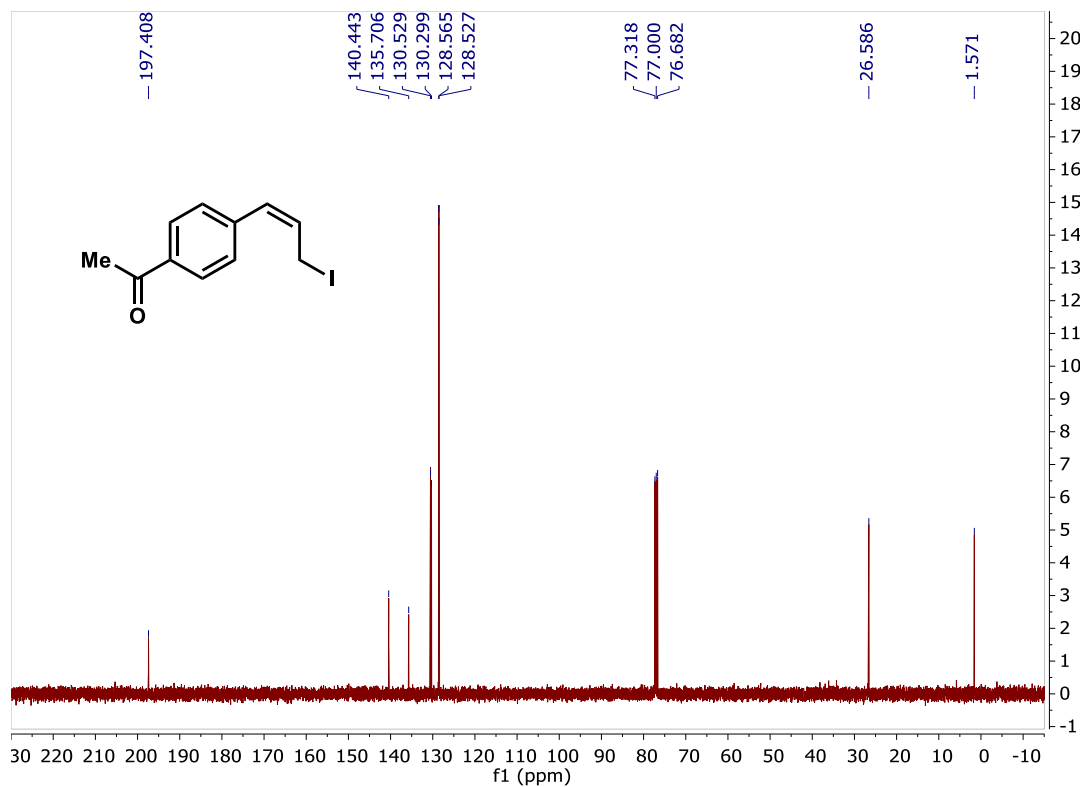



**(Z)-4-(3-Iodoprop-1-en-1-yl)-N,N-dimethylbenzamide, 1g**

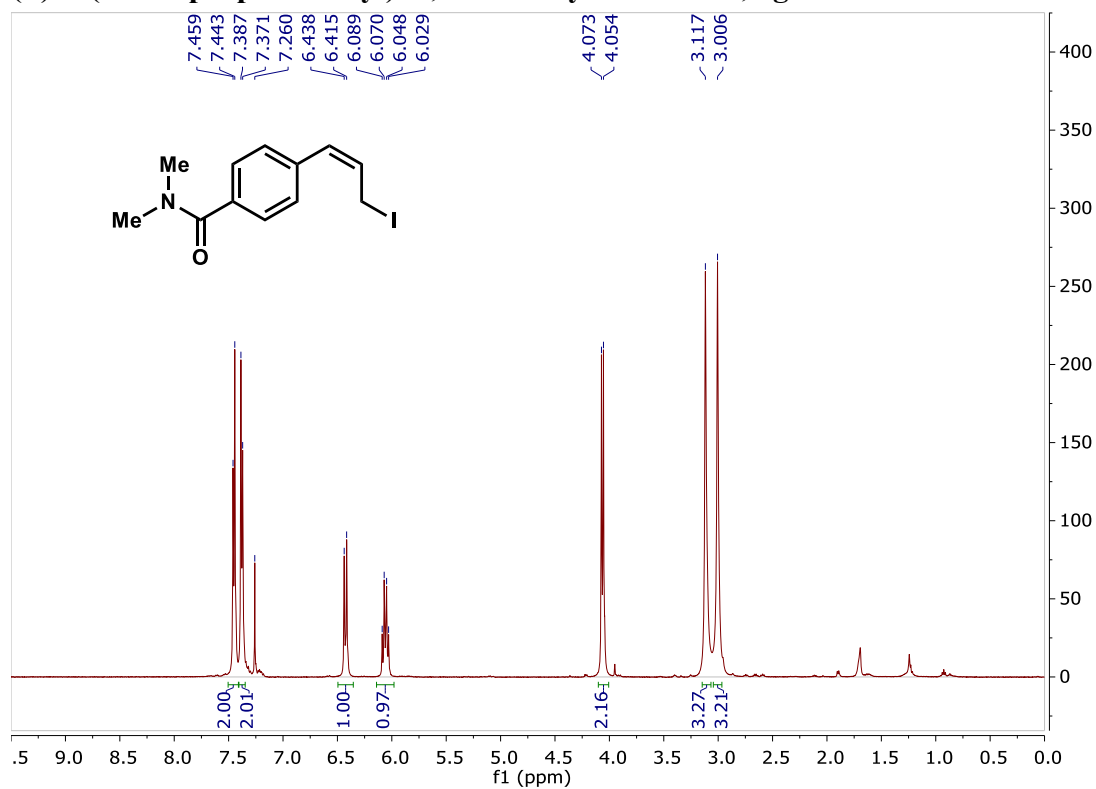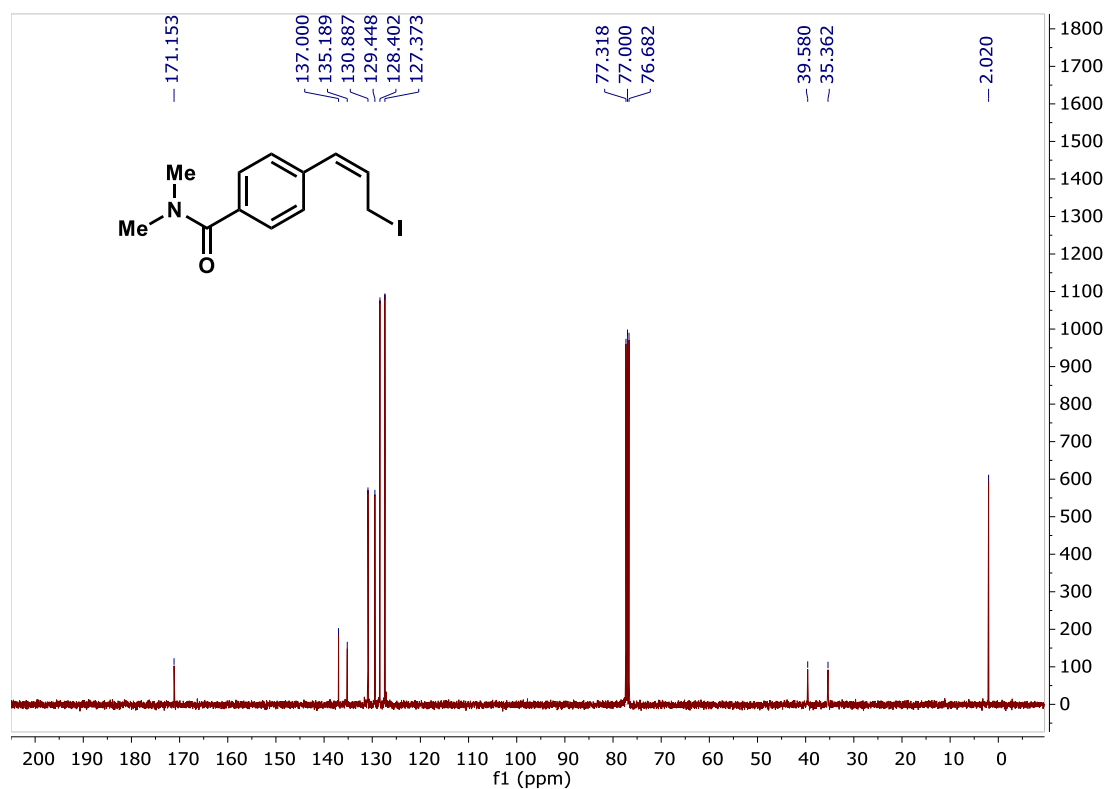

**(Z)-1-(3-iodoprop-1-en-1-yl)-4-(trifluoromethoxy)benzene, 1i**

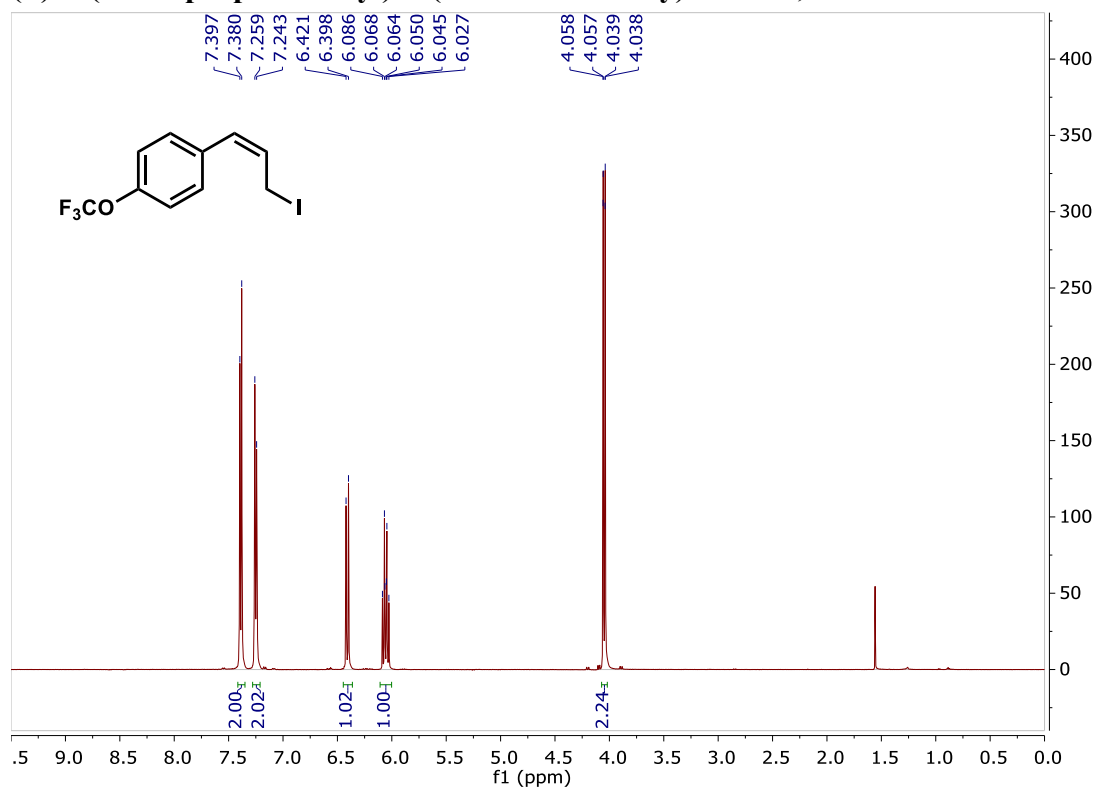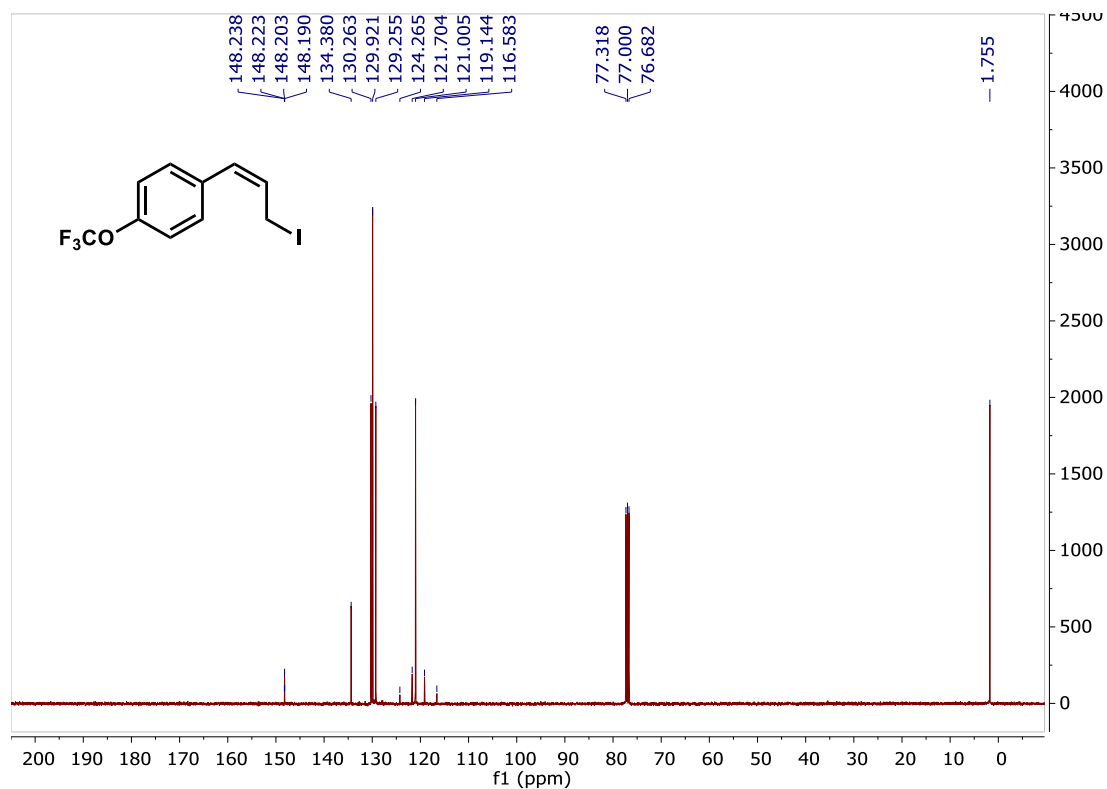

**(Z)-1-(3-iodoprop-1-en-1-yl)-3-(trifluoromethyl)benzene, 1j**

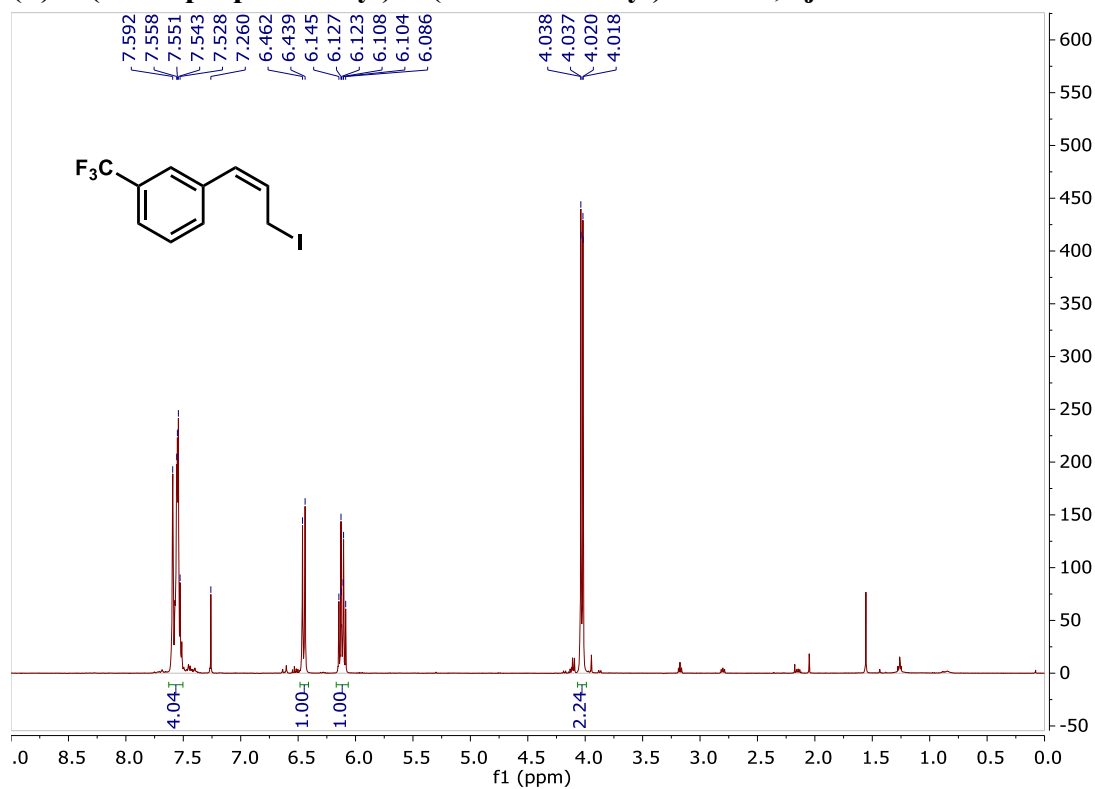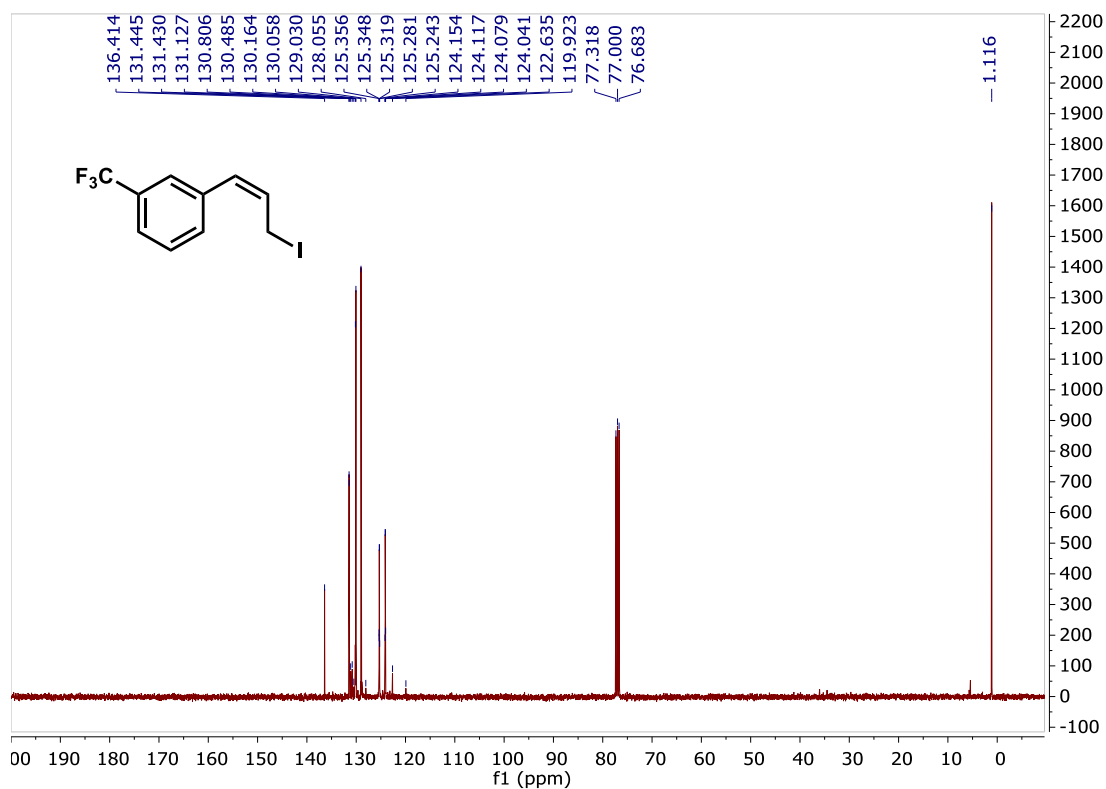

**(Z)-1-(3-Iodoprop-1-en-1-yl)-3-methylbenzene, 1k**

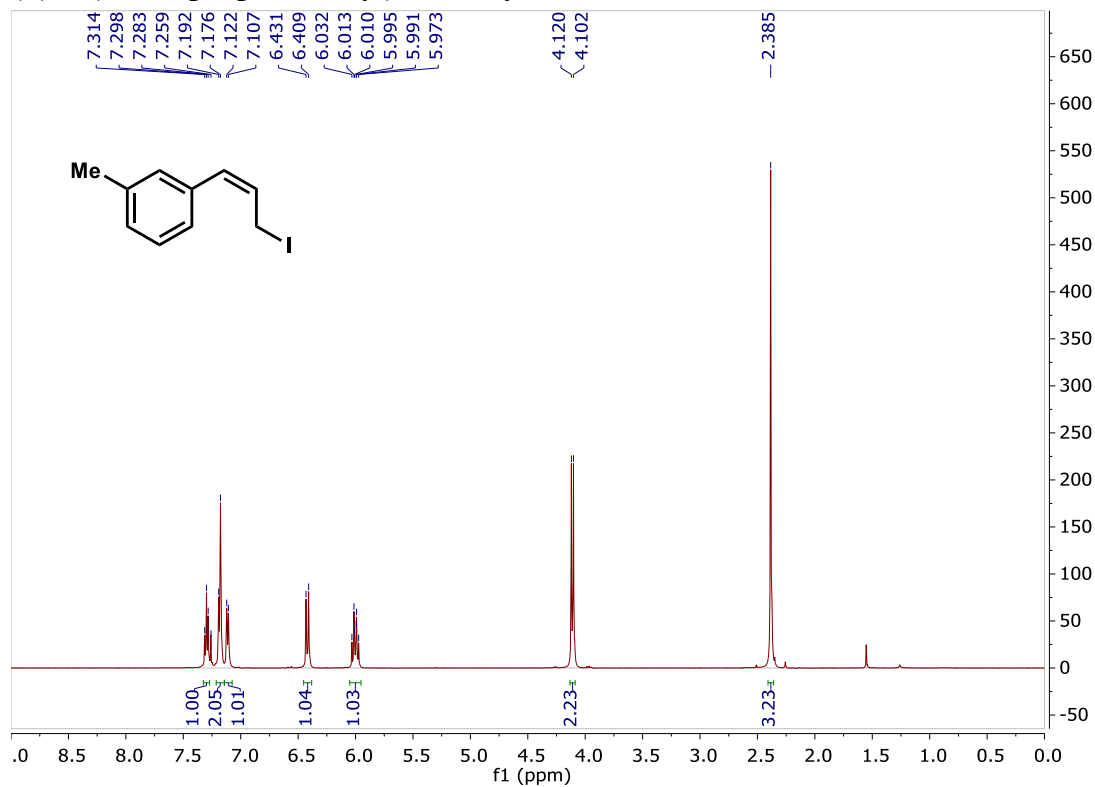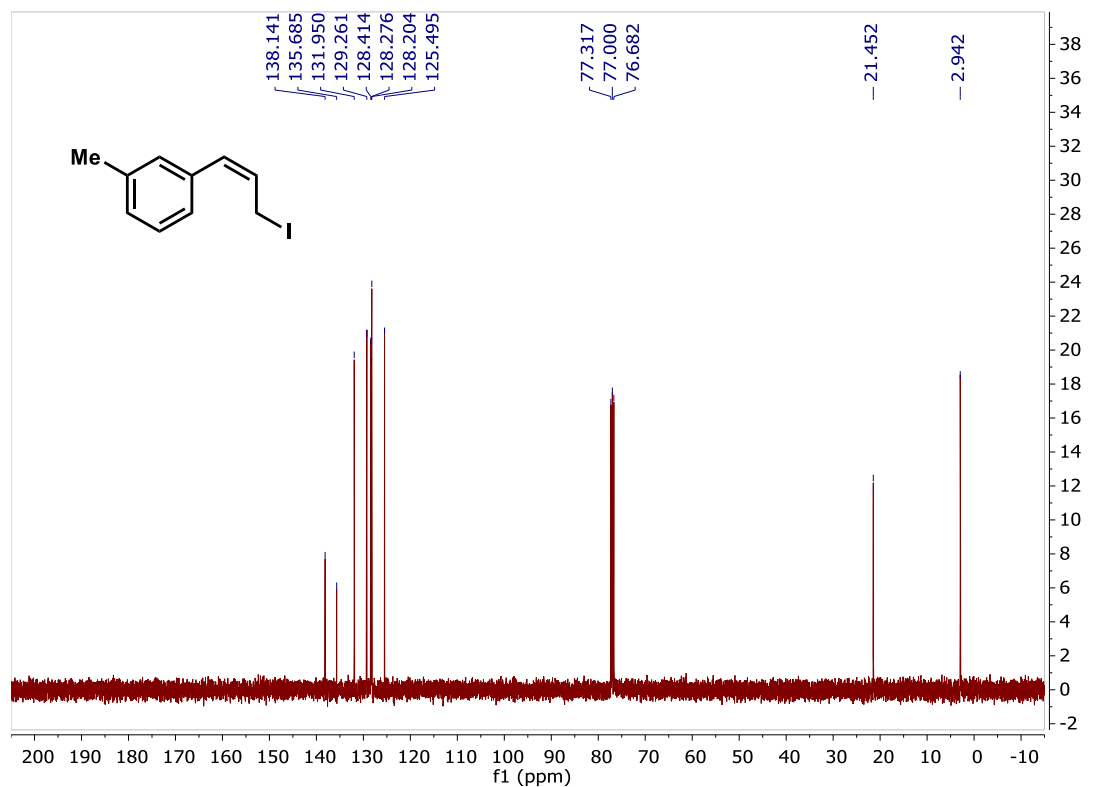

**(Z)-1-Chloro-2-(3-iodoprop-1-en-1-yl)benzene, 11**

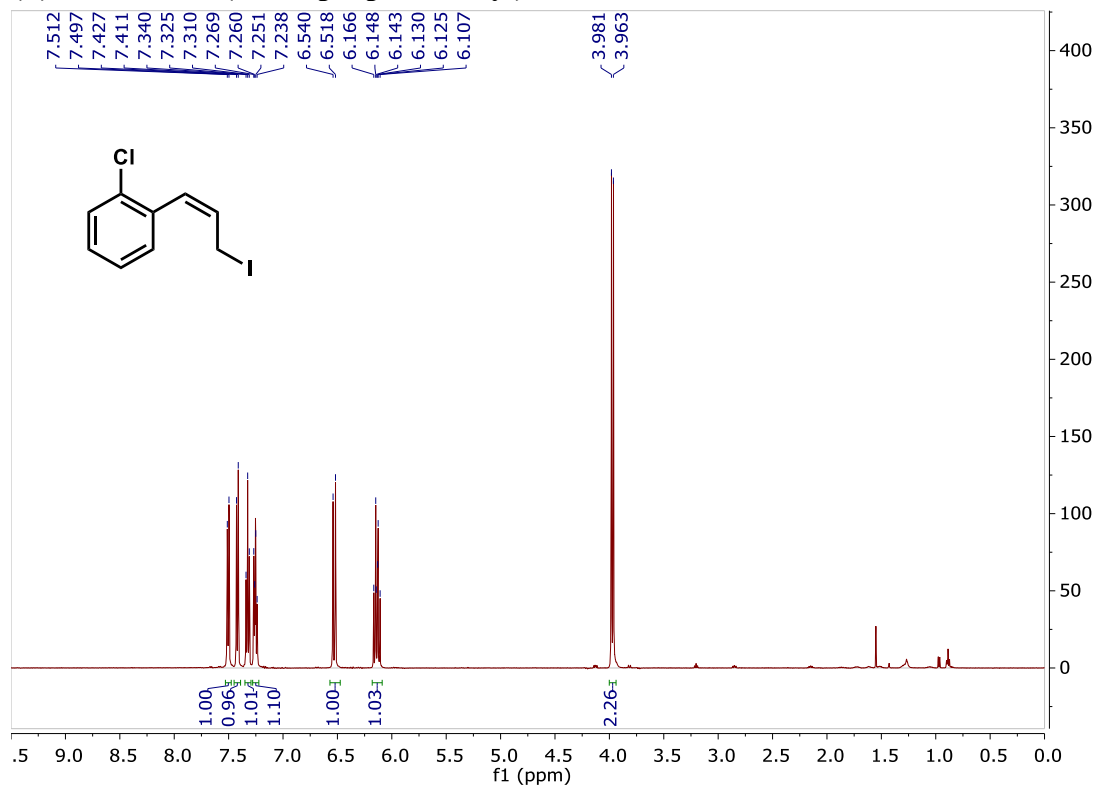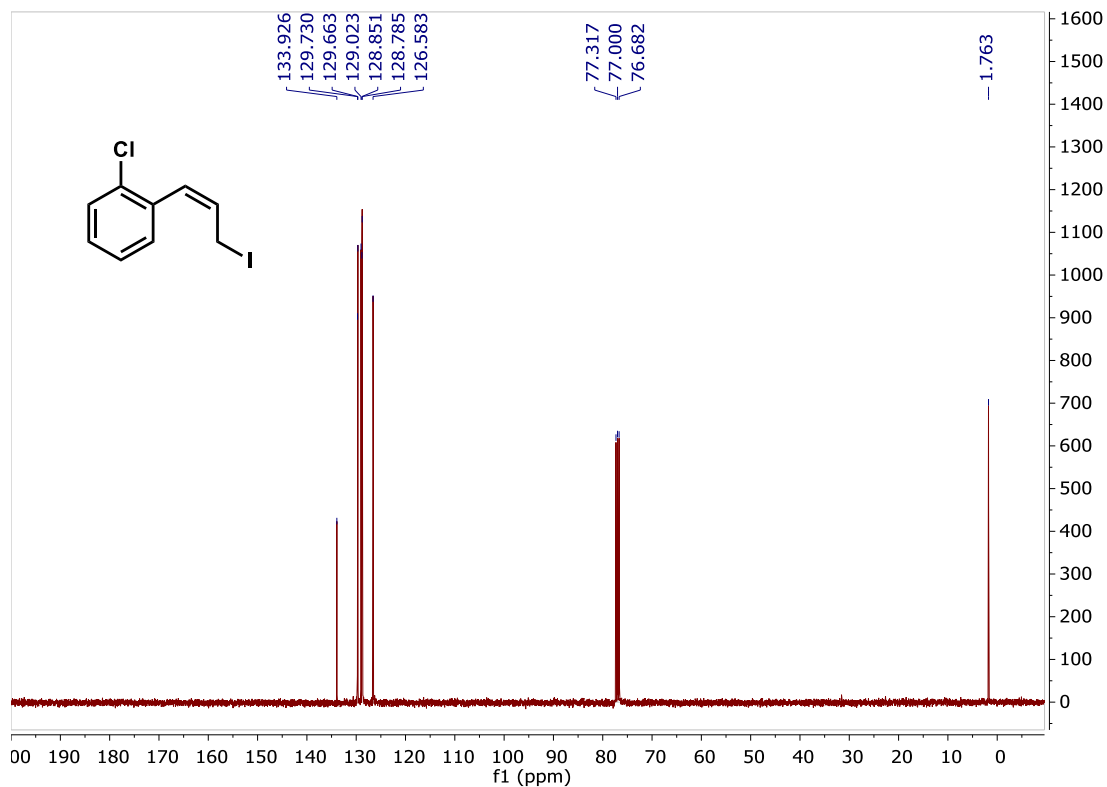

### (Z)-1-Bromo-2-(3-iodoprop-1-en-1-yl)benzene, 1m

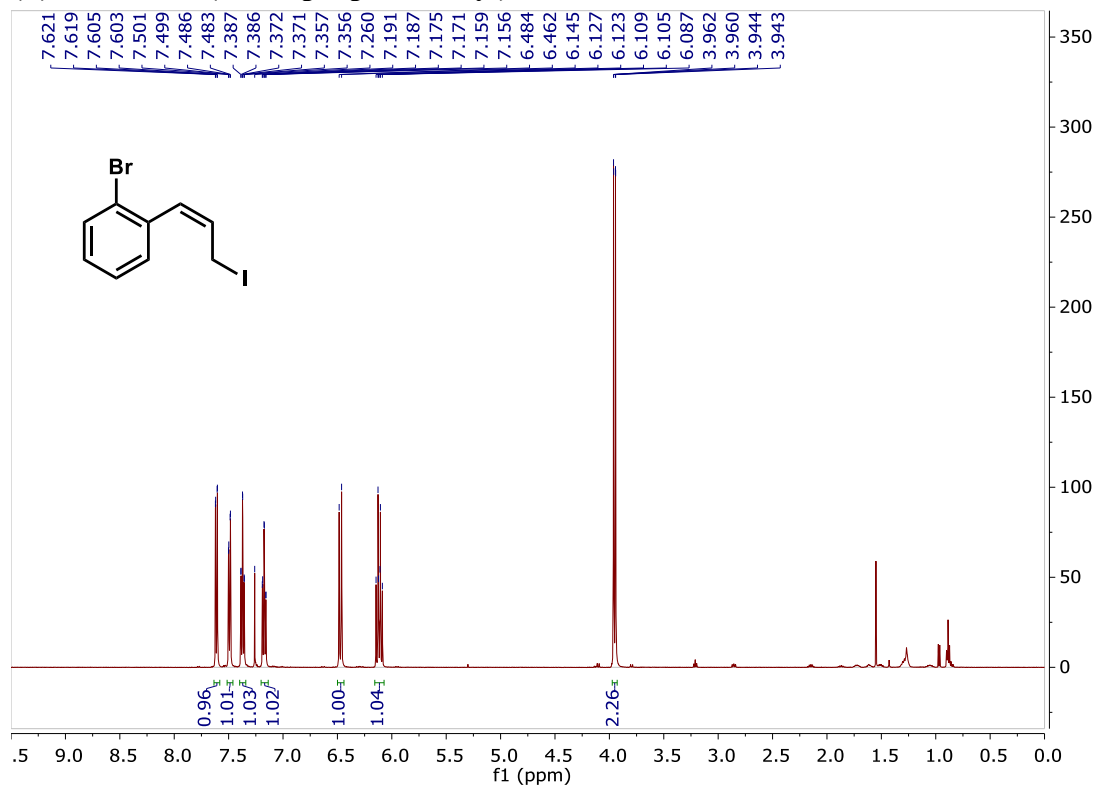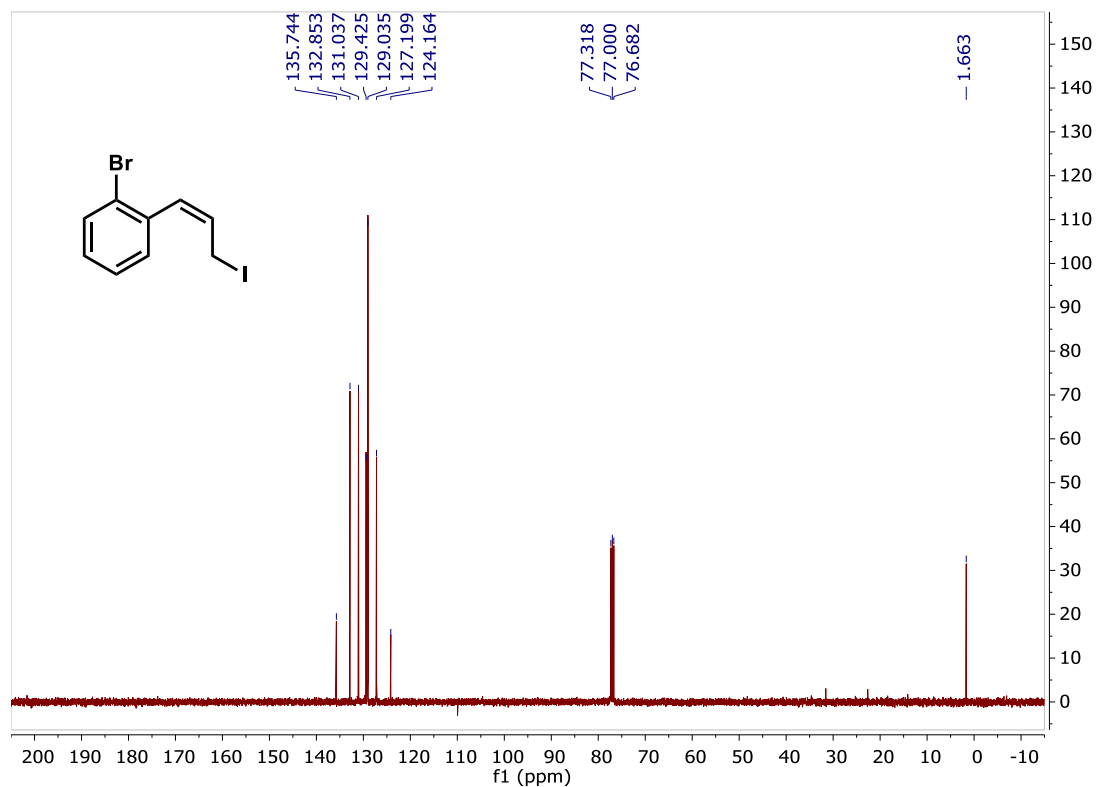

# (2-Iodoethylidene)cyclopentane, 1t

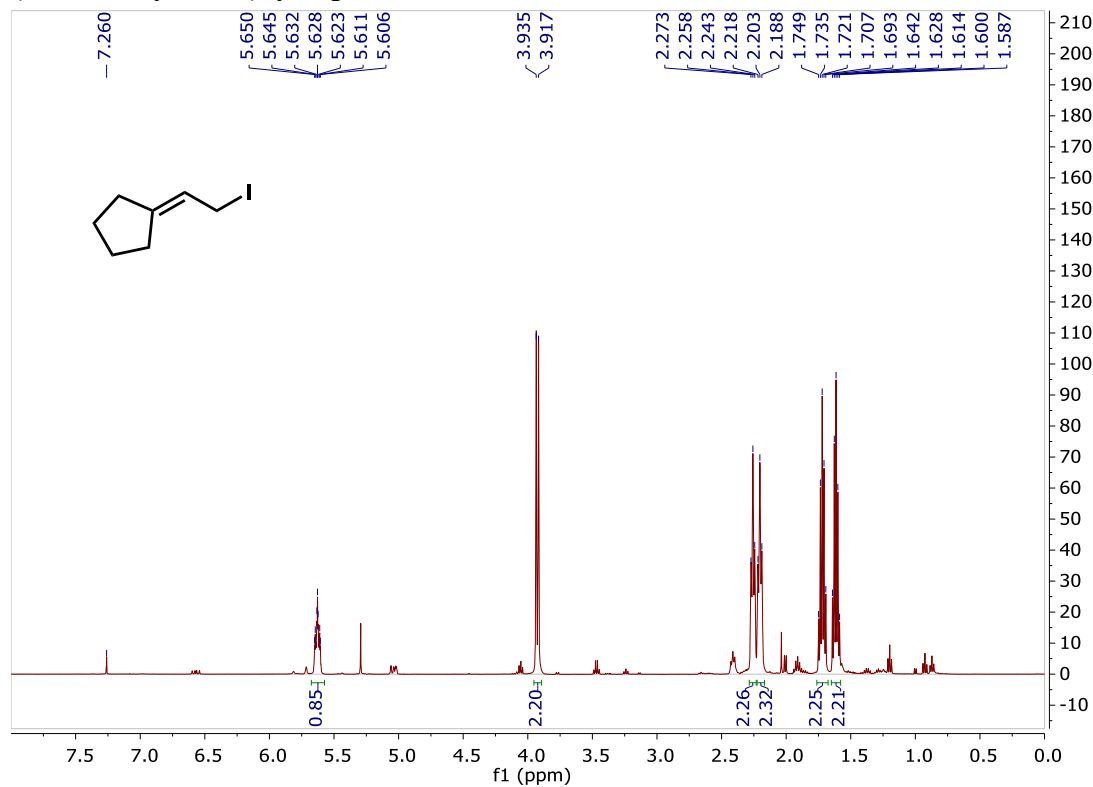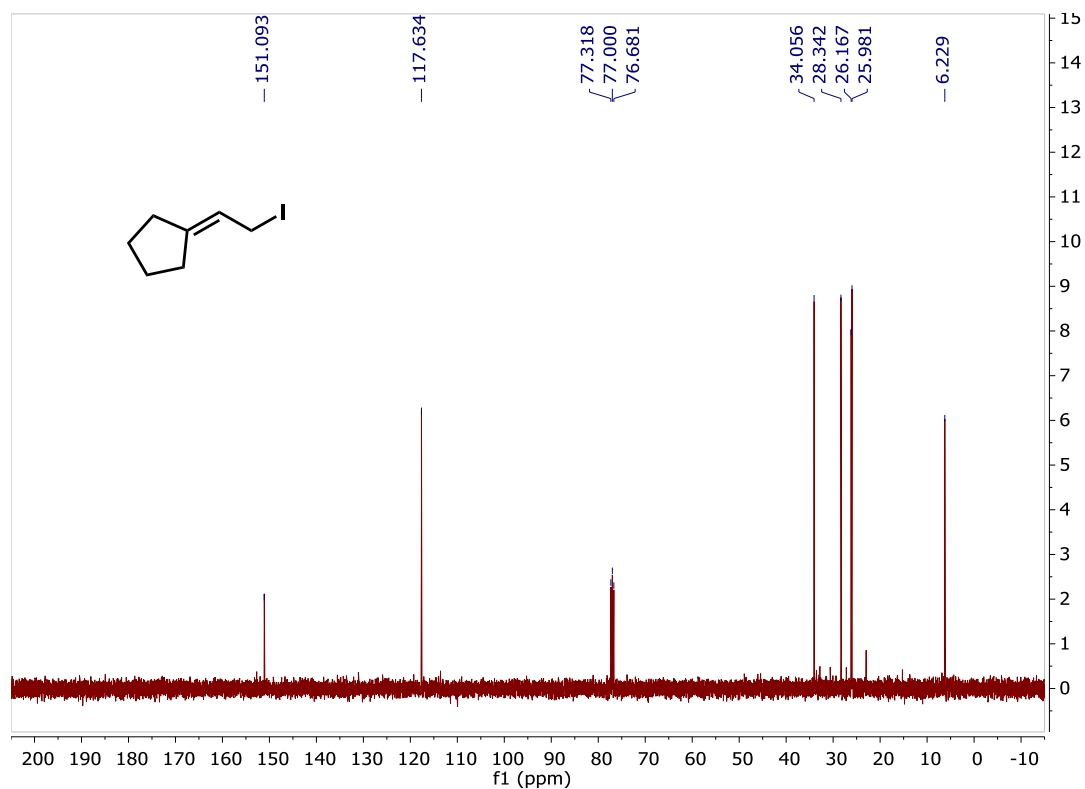

### (2-Iodoethylidene)cycloheptane, 1v

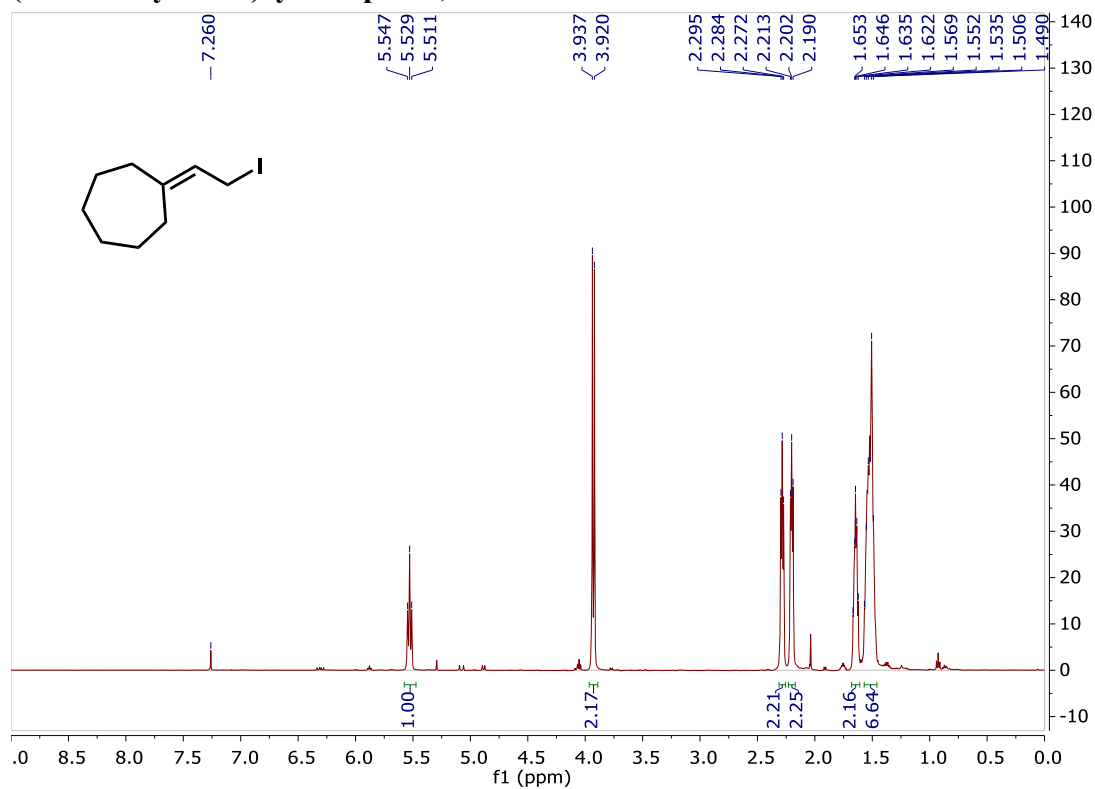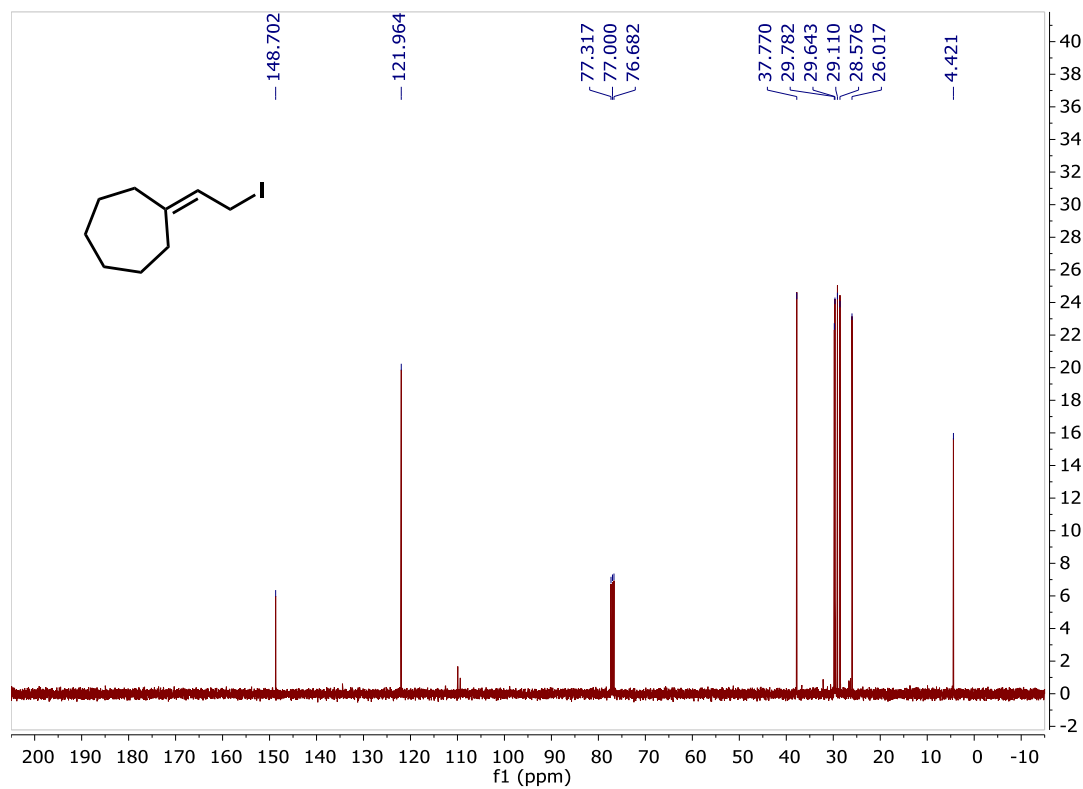



### 4-(2-Iodoethylidene)tetrahydro-2H-pyran, 1w

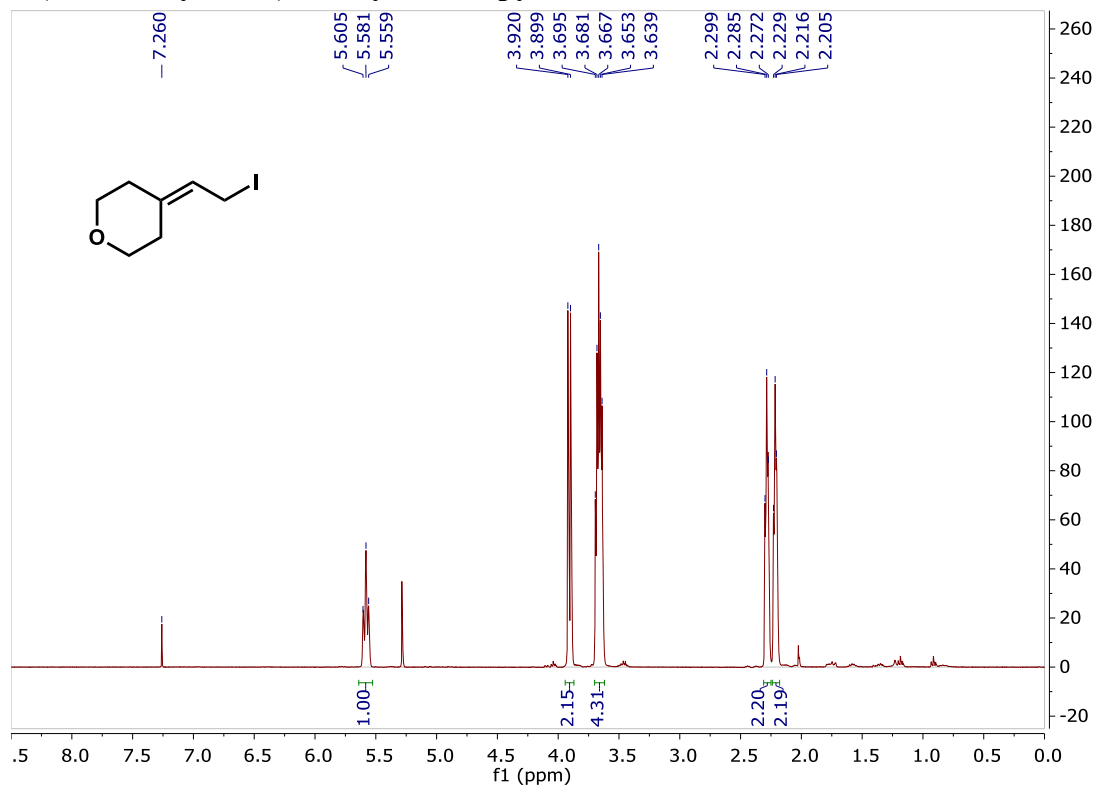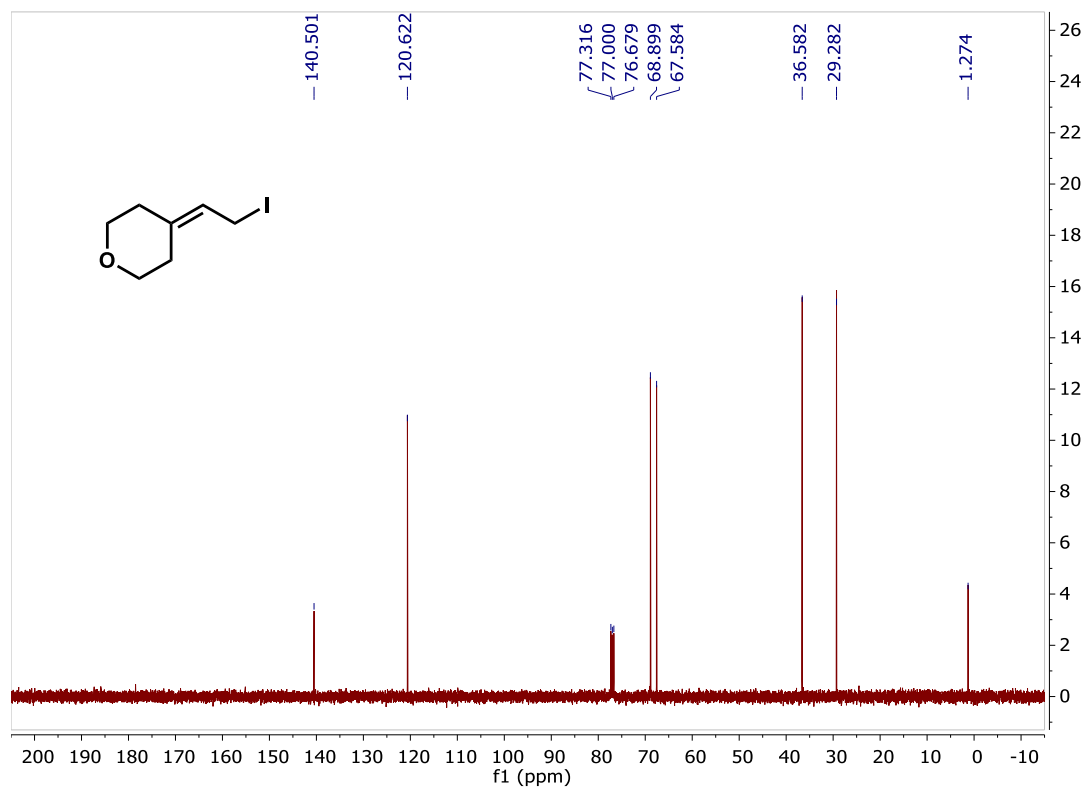

***tert*-Butyl 4-(2-iodoethylidene)piperidine-1-carboxylate, 1x**

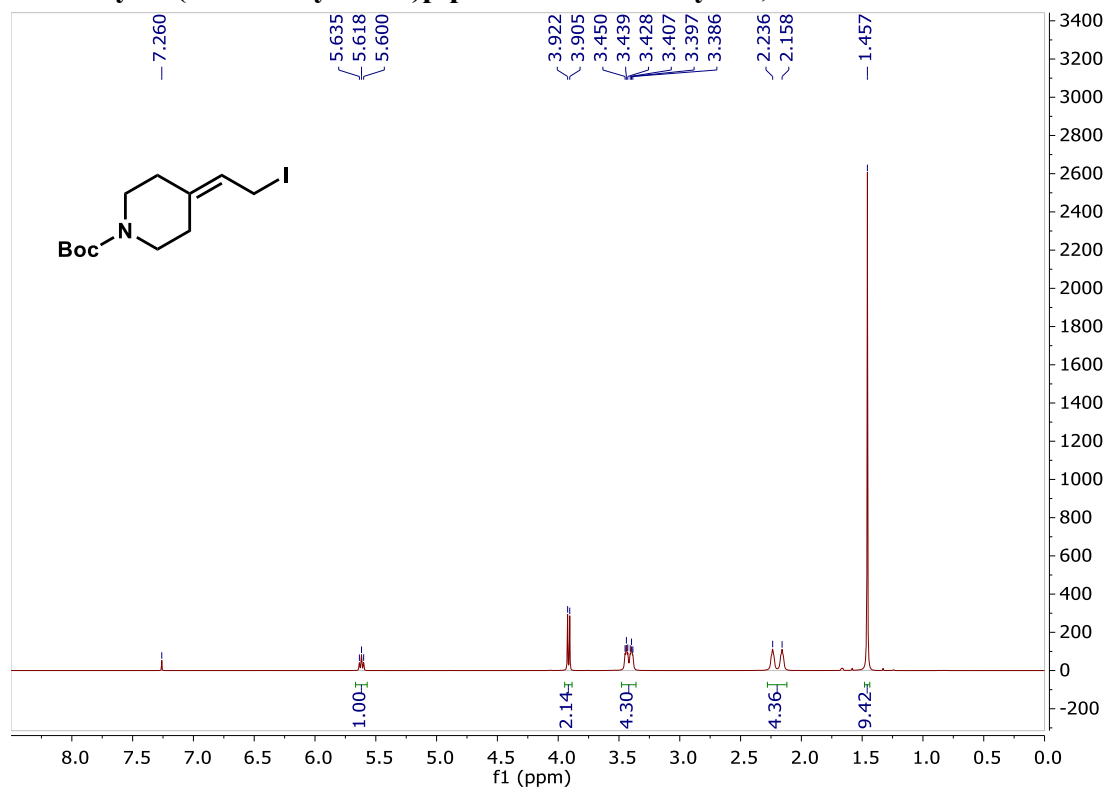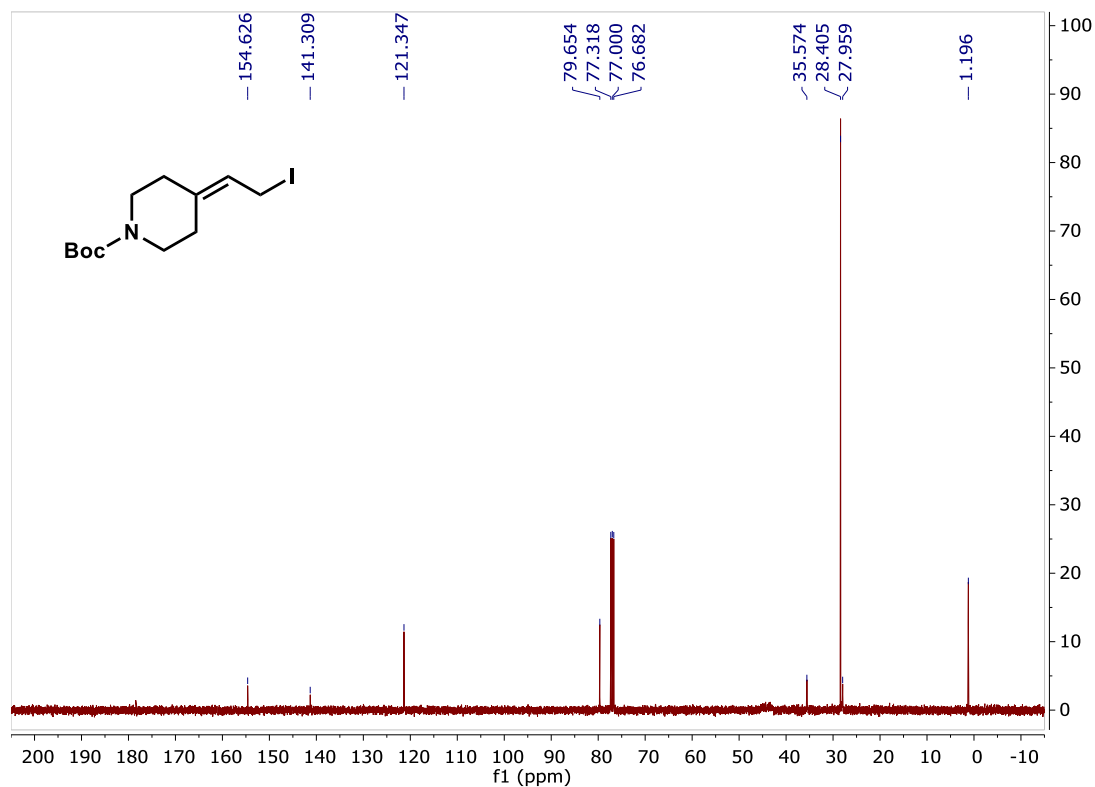

**(+)-tert-Butyl (2*R*, 3*S*)-2-iodo-3-phenylpent-4-enoate, 5a**

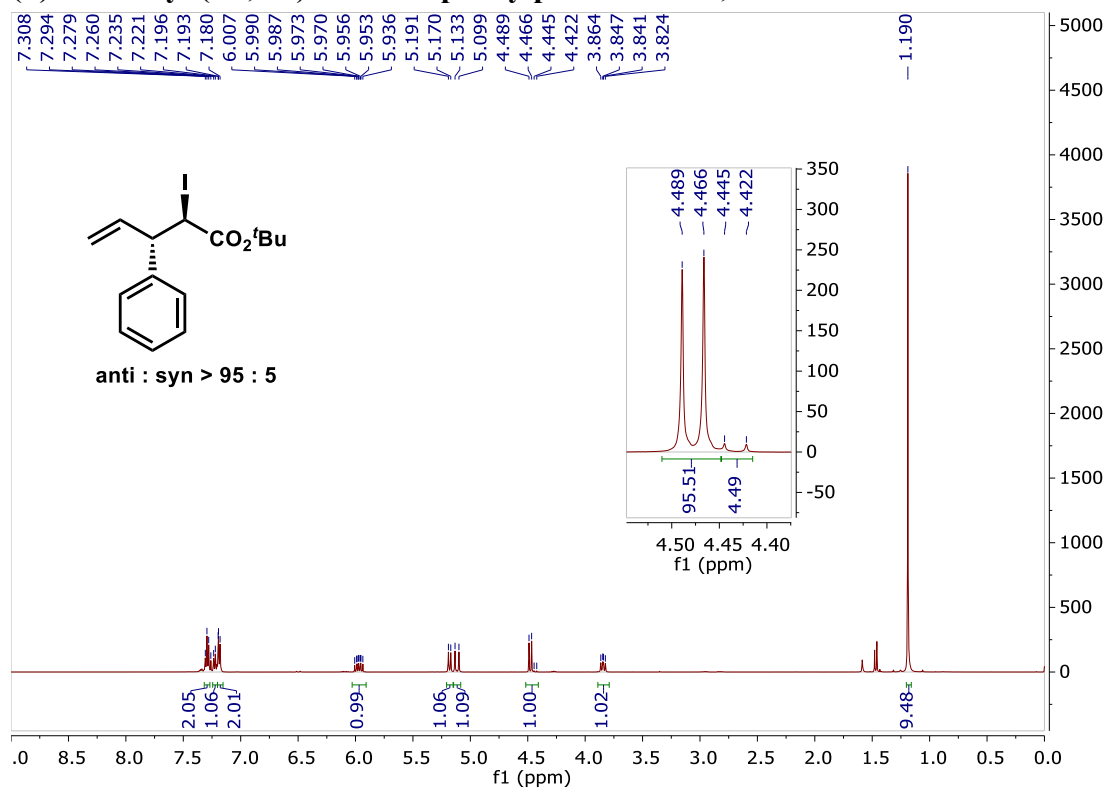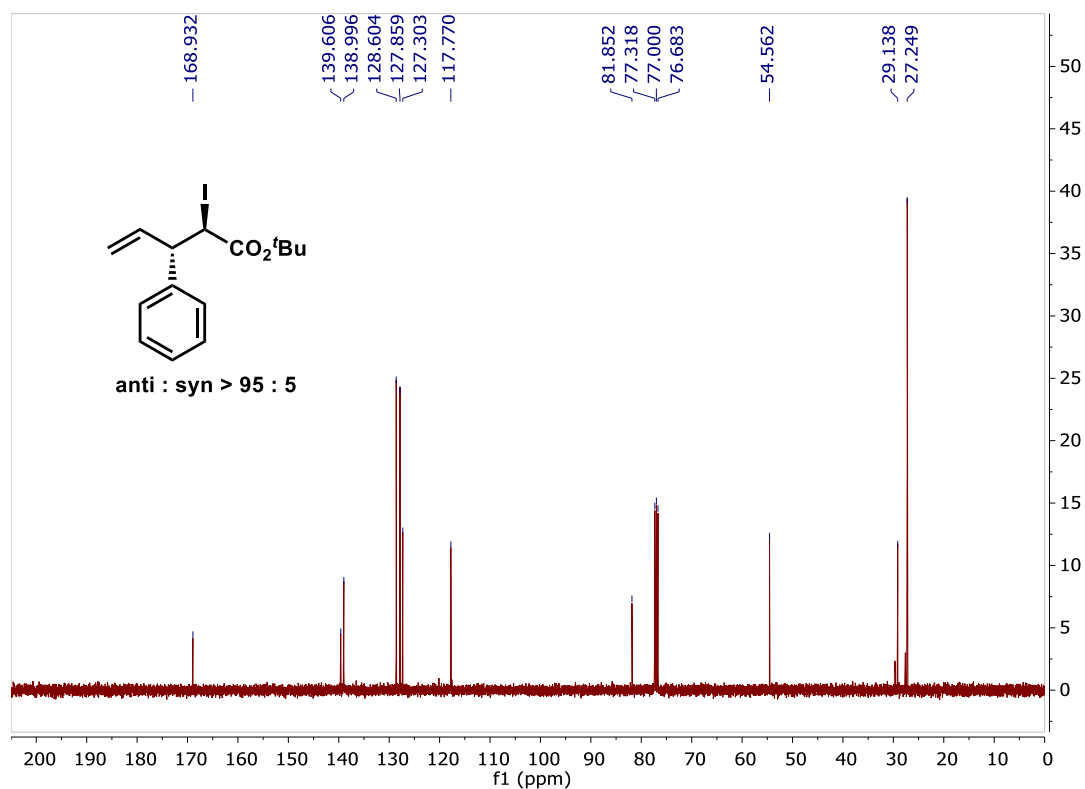

**(+)-*tert*-Butyl (2*R*, 3*S*)-3-([1,1'-biphenyl]-4-yl)-2-iodopent-4-enoate, 5b**

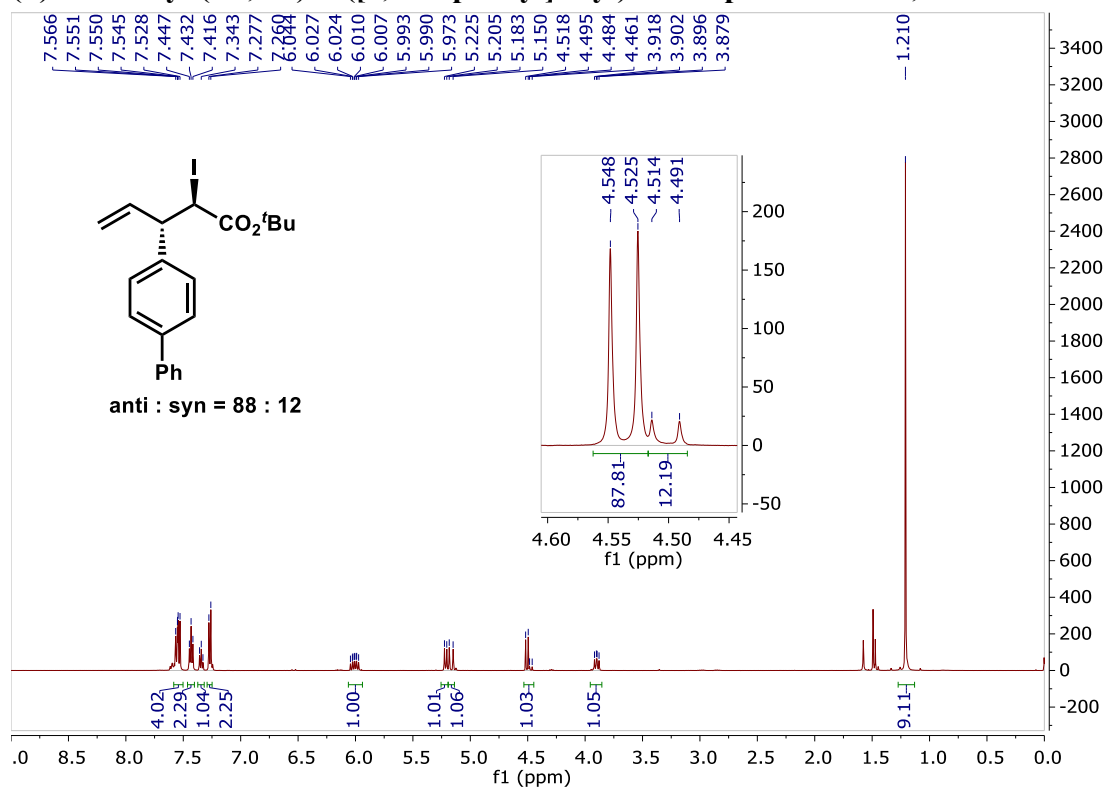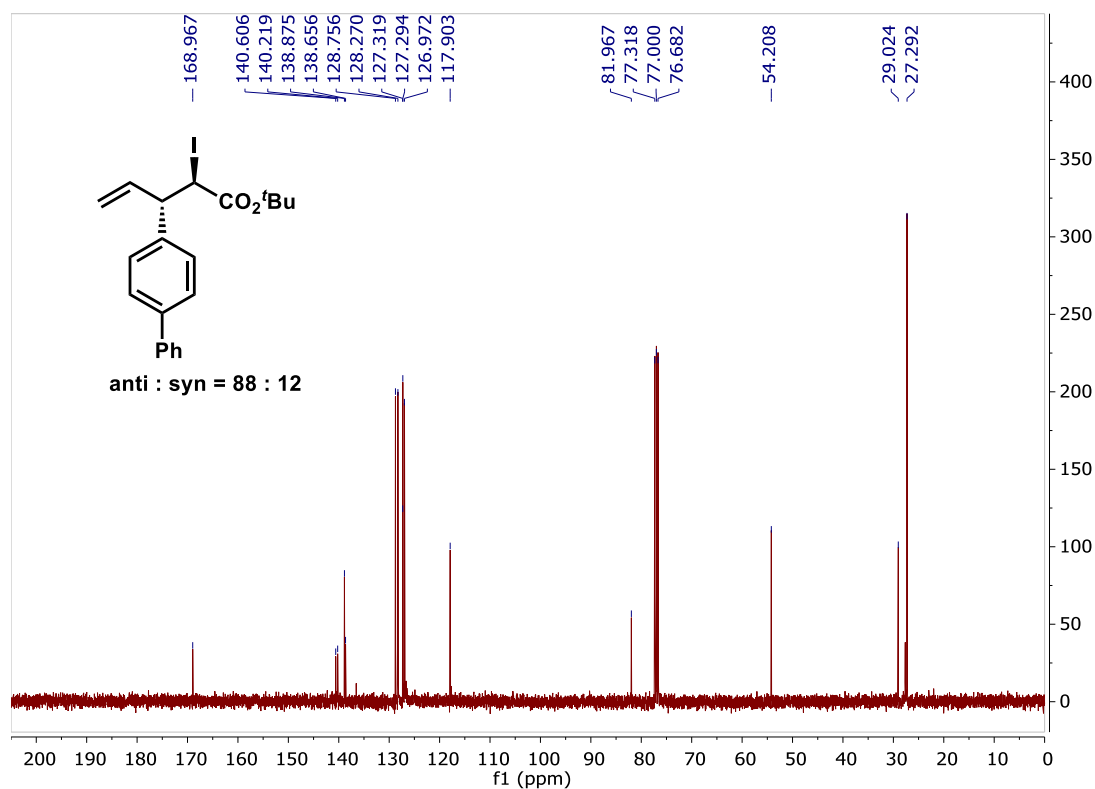

**(+)-*tert*-Butyl (2*R*, 3*S*)-2-iodo-3-(naphthalen-1-yl)pent-4-enoate, 5c**

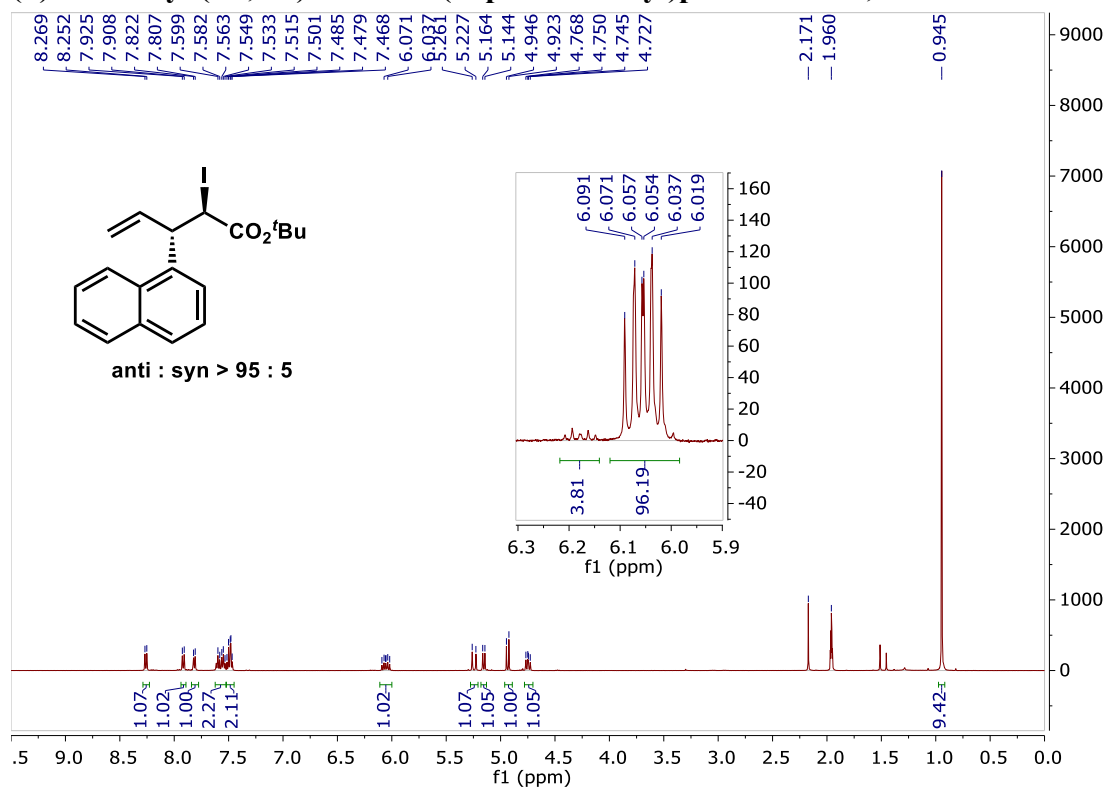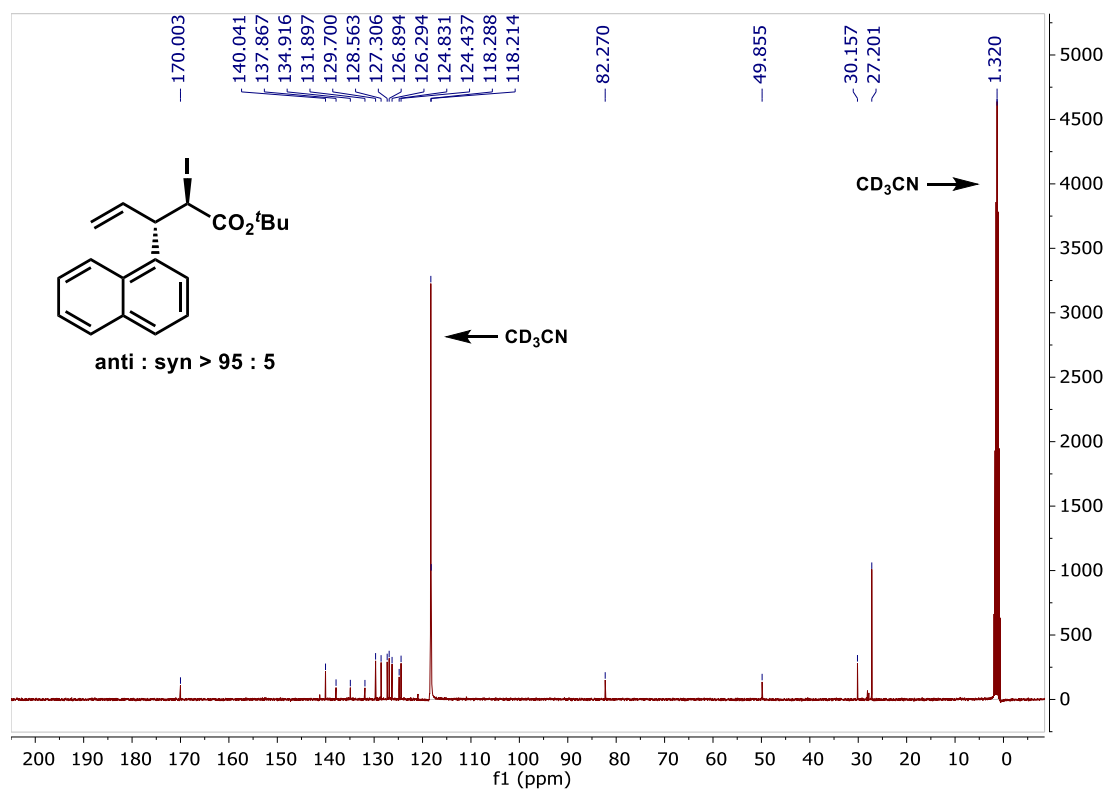

**(+)-*tert*-Butyl (2*R*, 3*S*)-2-iodo-3-(naphthalen-2-yl)pent-4-enoate, 5d**

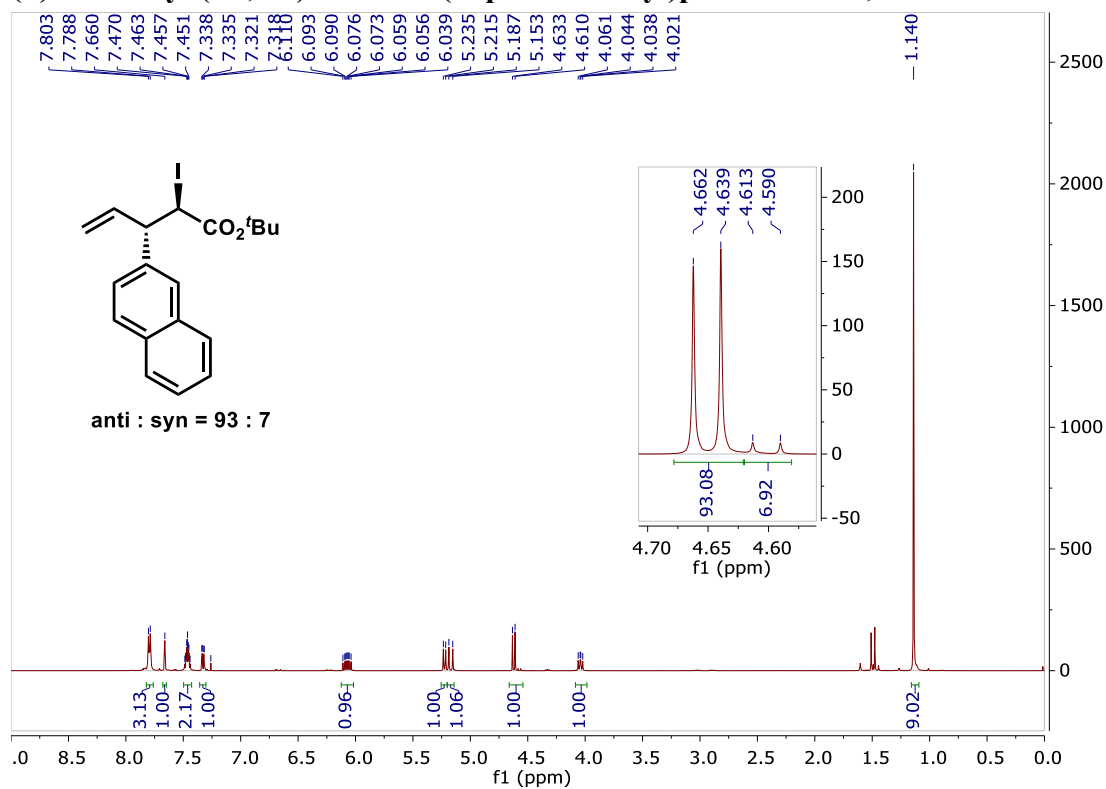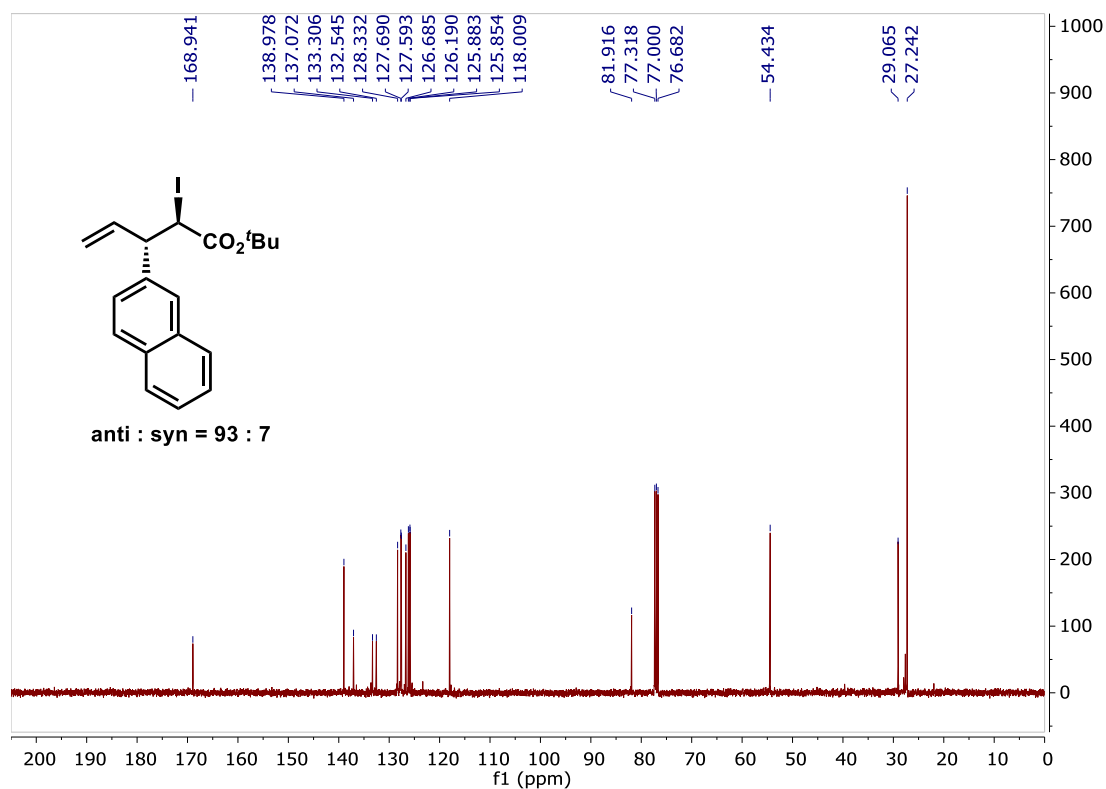

**(+)-*tert*-Butyl (2*R*, 3*S*)-3-(4-acetylphenyl)-2-iodopent-4-enoate, 5e**

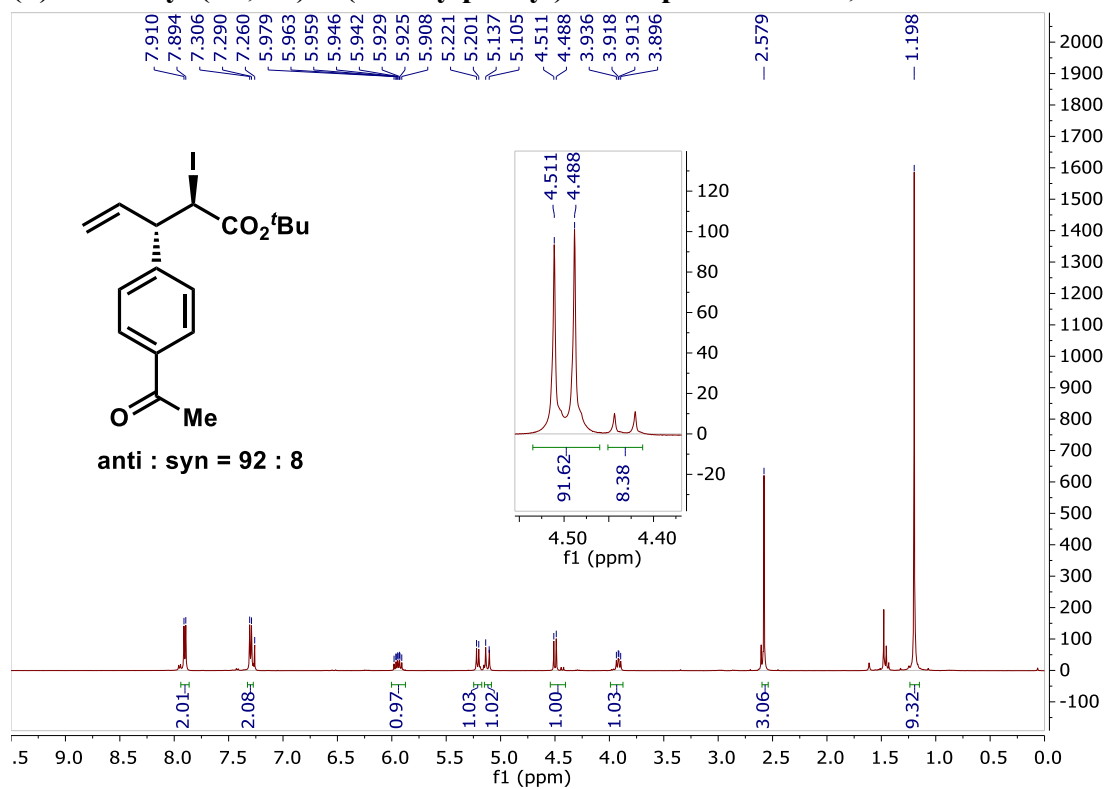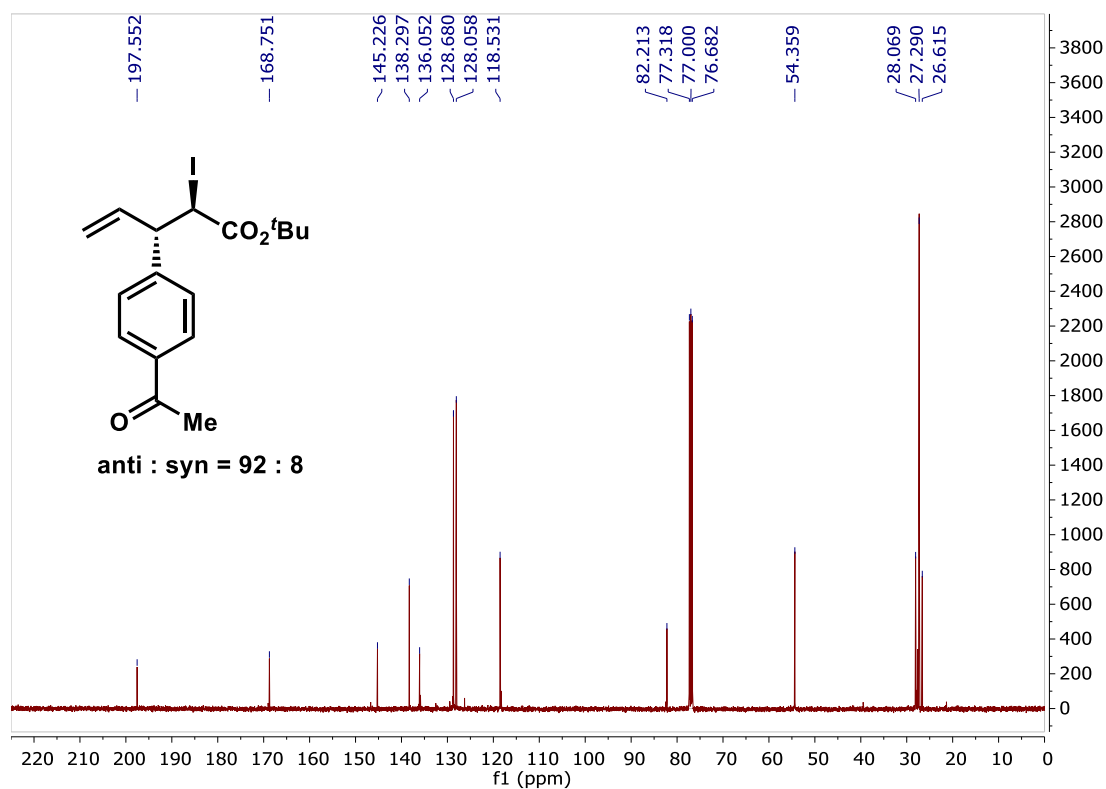

**(+)-Methyl 4-((3*S*, 4*R*)-5-(*tert*-butoxy)-4-iodo-5-oxpent-1-en-3-yl)benzoate, 5f**

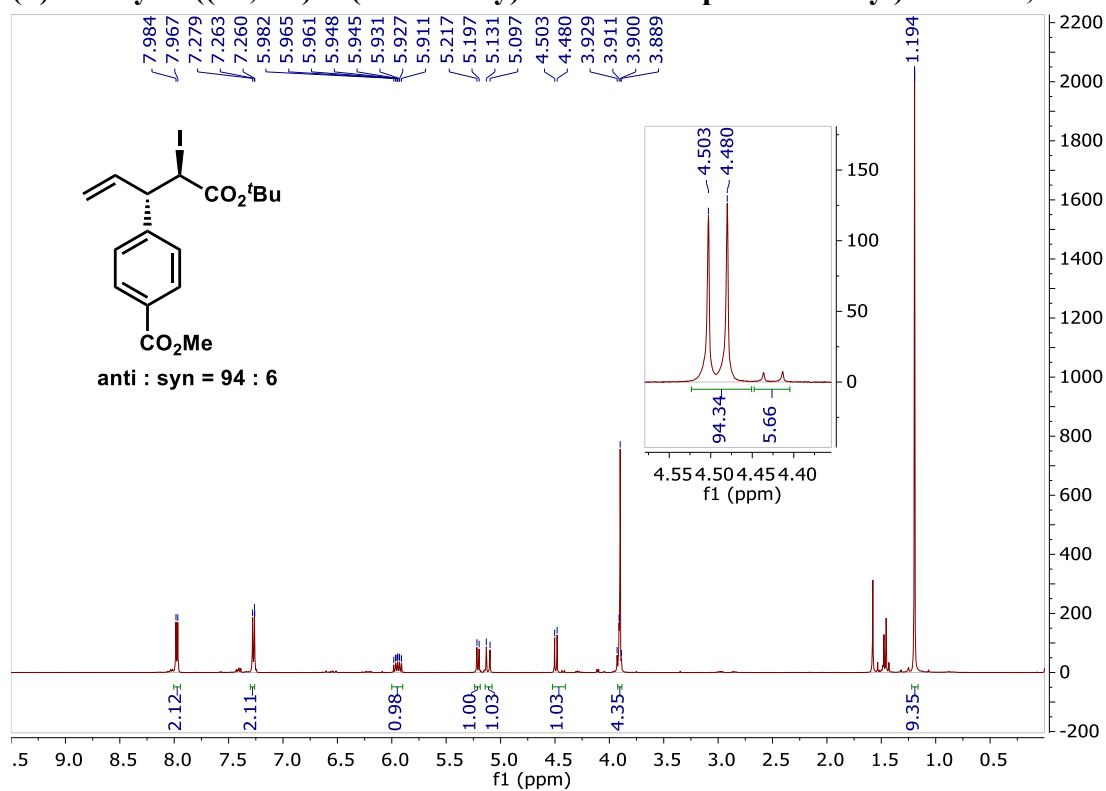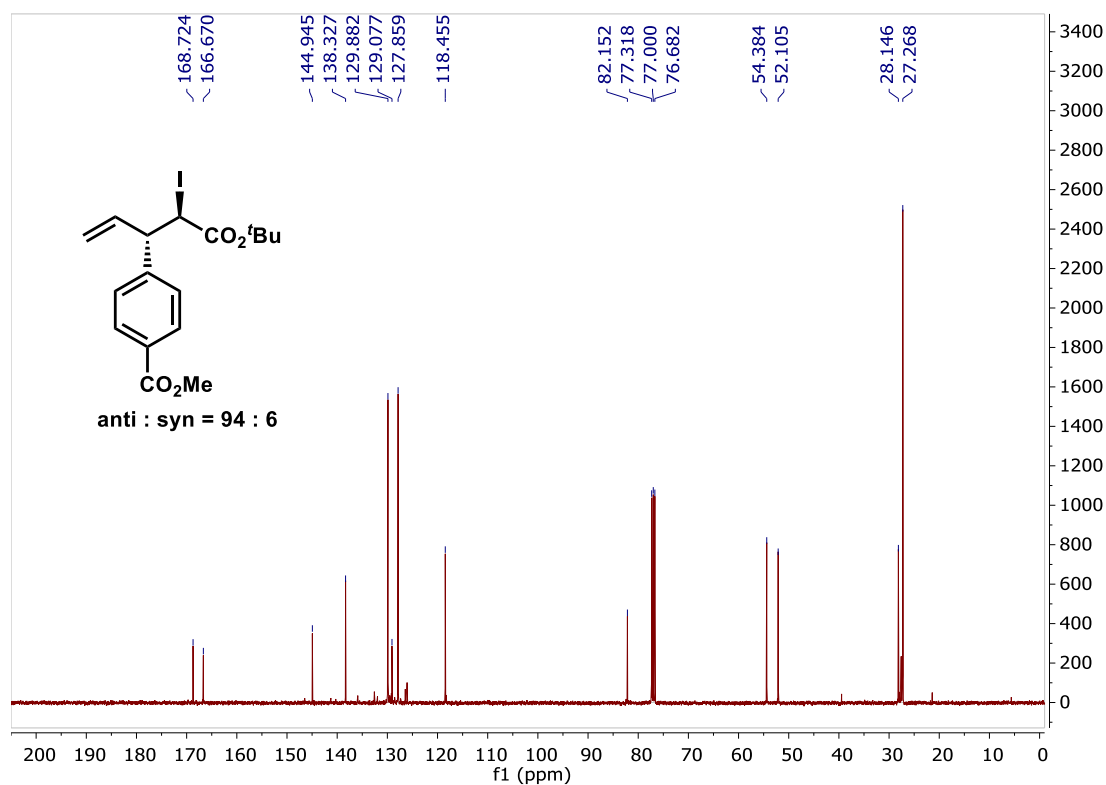



**(+)-*tert*-Butyl (2*R*, 3*S*)-3-(4-(dimethylcarbamoyl)phenyl)-2-iodopent-4-enoate, 5g**

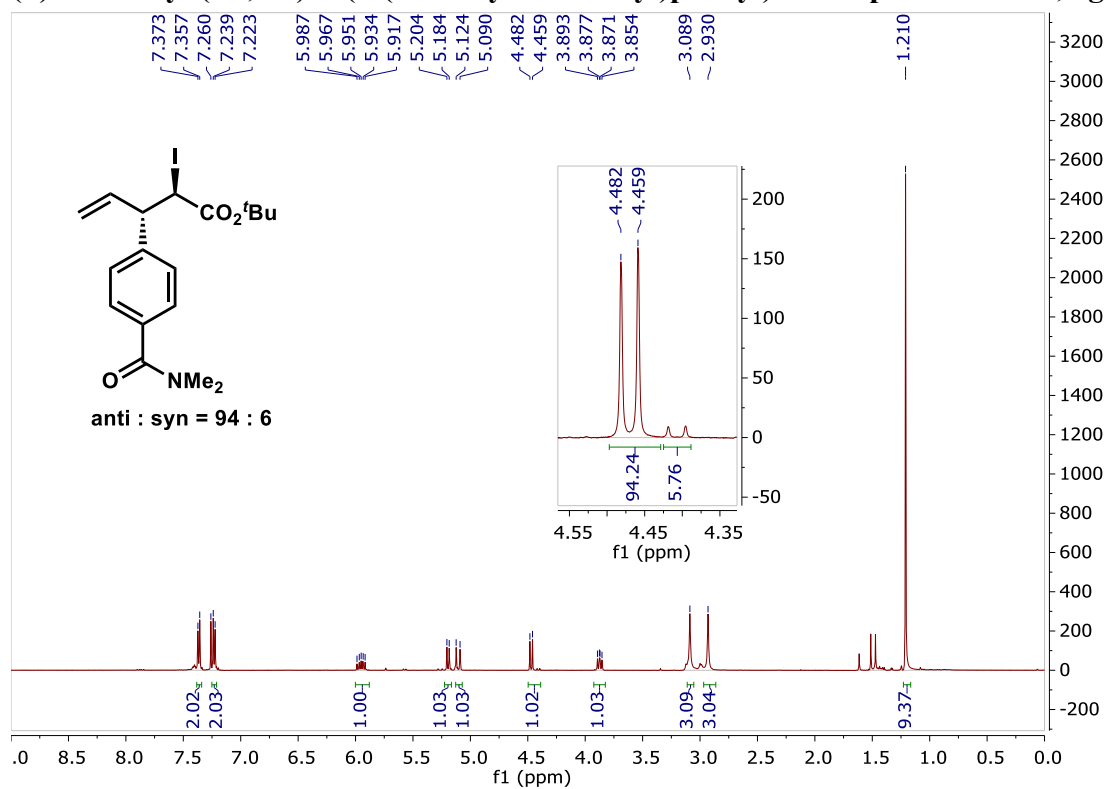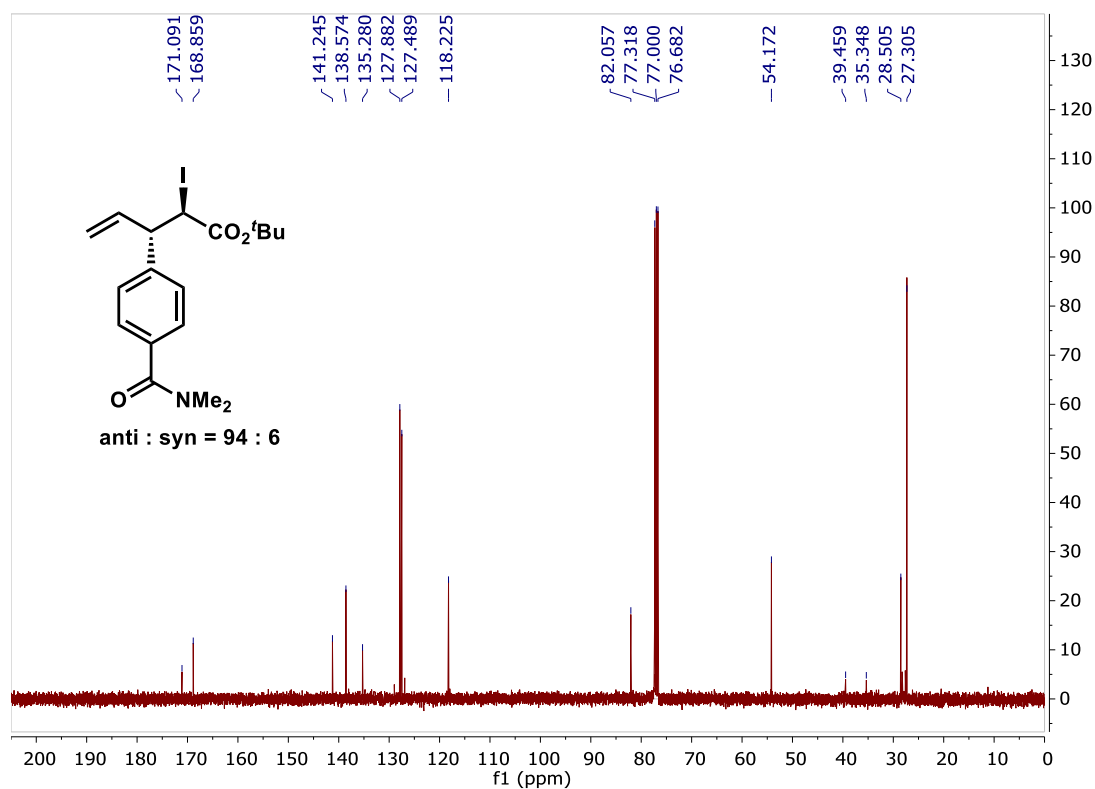

**(+)-*tert*-Butyl (2*R*, 3*S*)-3-(4-fluorophenyl)-2-iodopent-4-enoate, 5h**

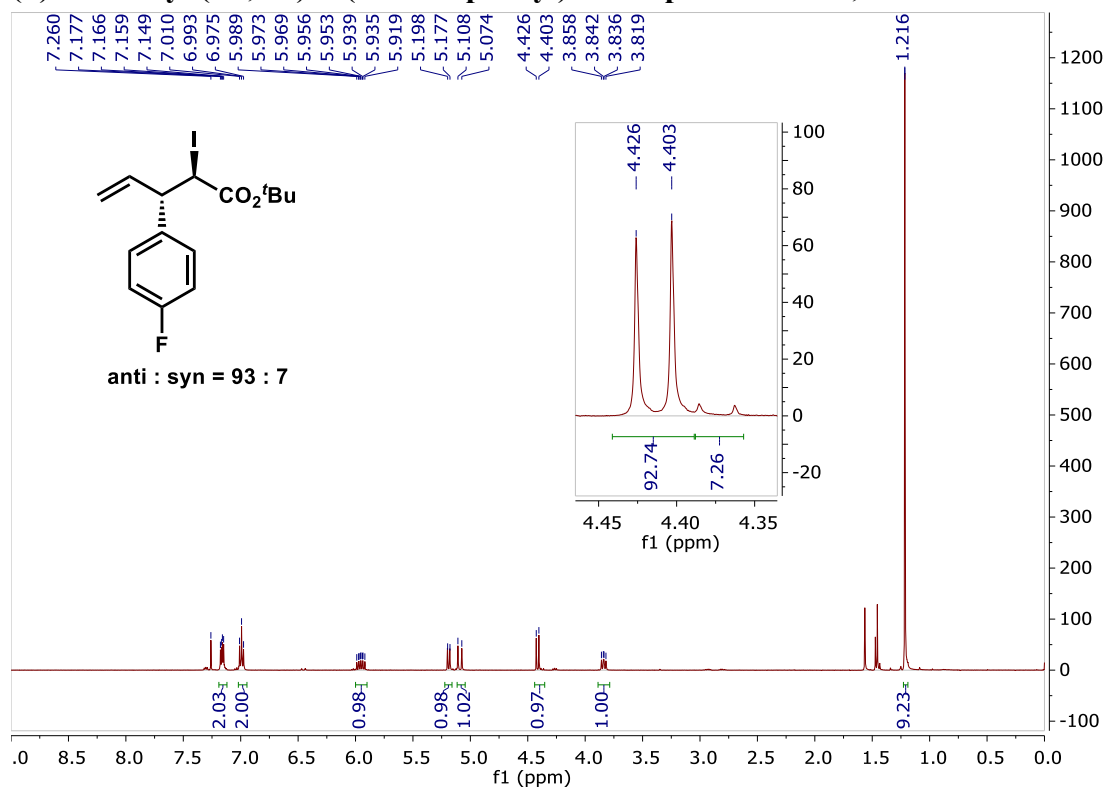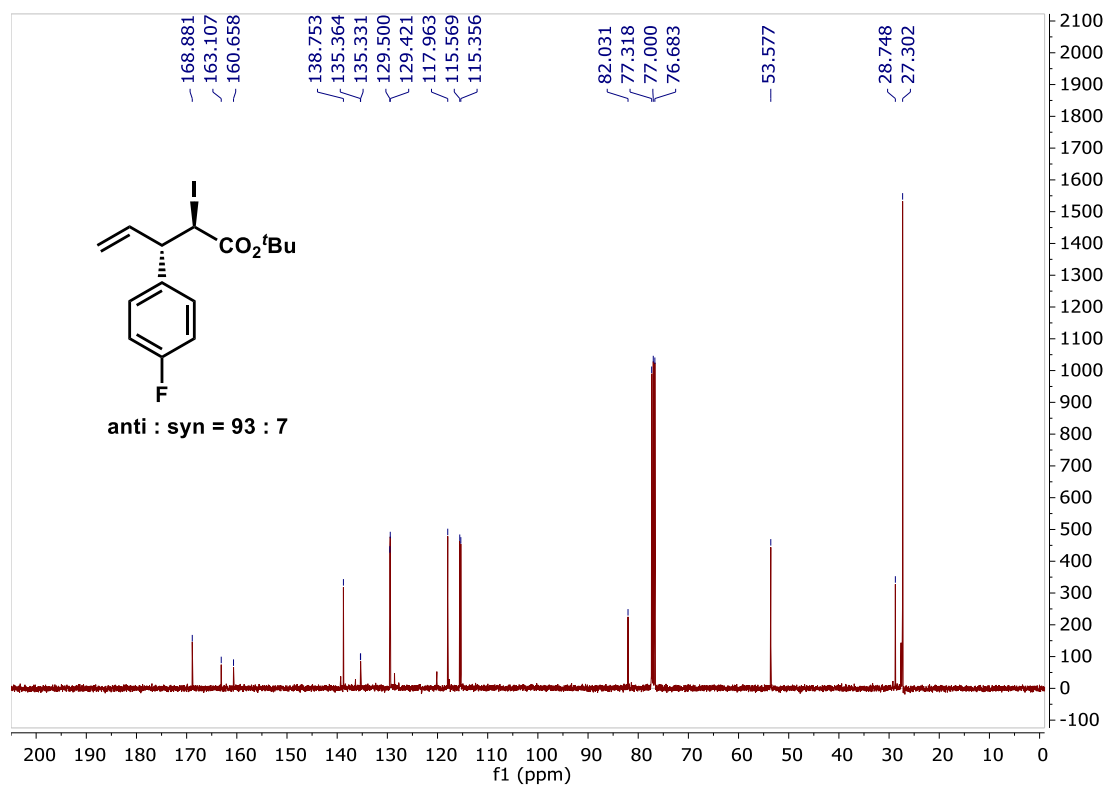

**(+)-*tert*-Butyl (2*R*, 3*S*)-2-iodo-3-(4-(trifluoromethoxy)phenyl)pent-4-enoate, 5i**

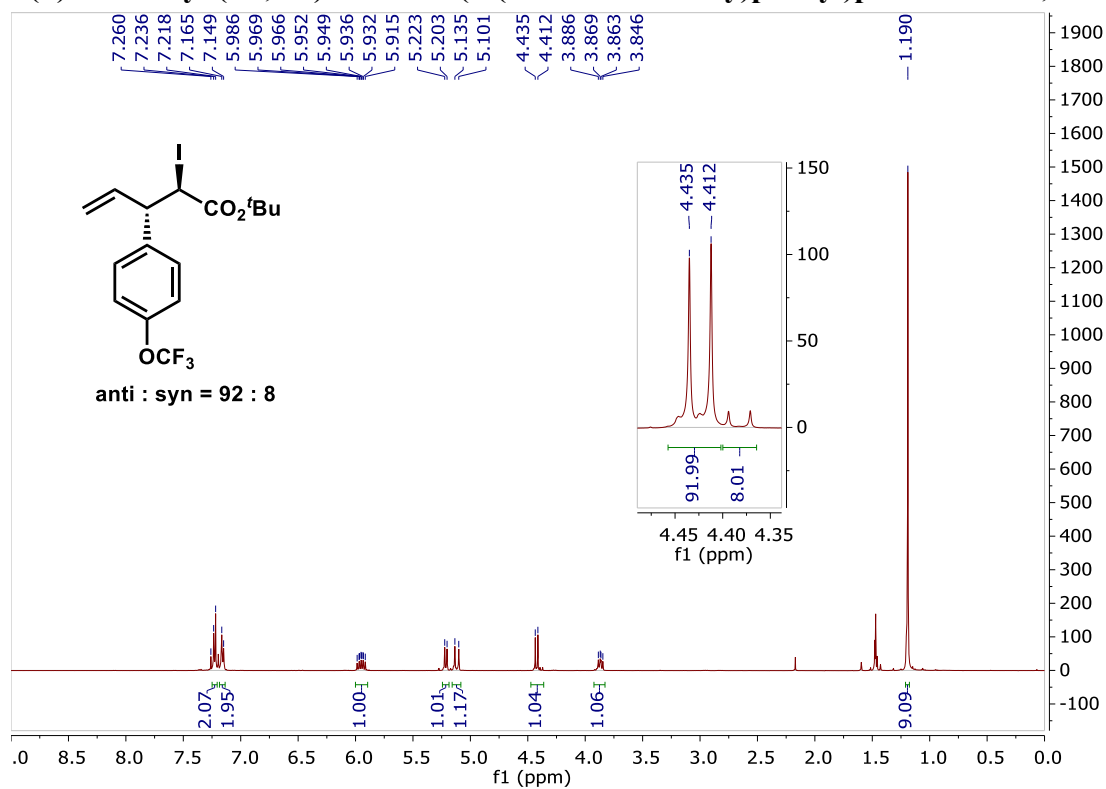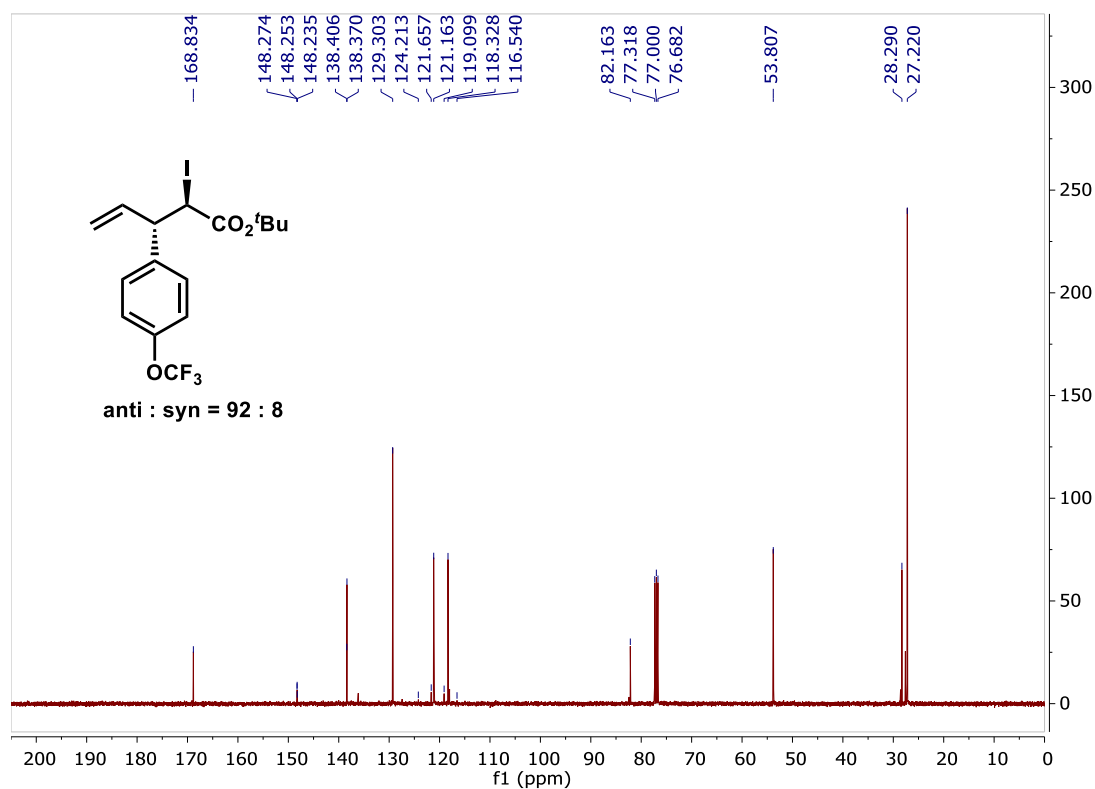

**(+)-*tert*-Butyl (2*R*, 3*S*)-2-iodo-3-(3-(trifluoromethyl)phenyl)pent-4-enoate, 5j**

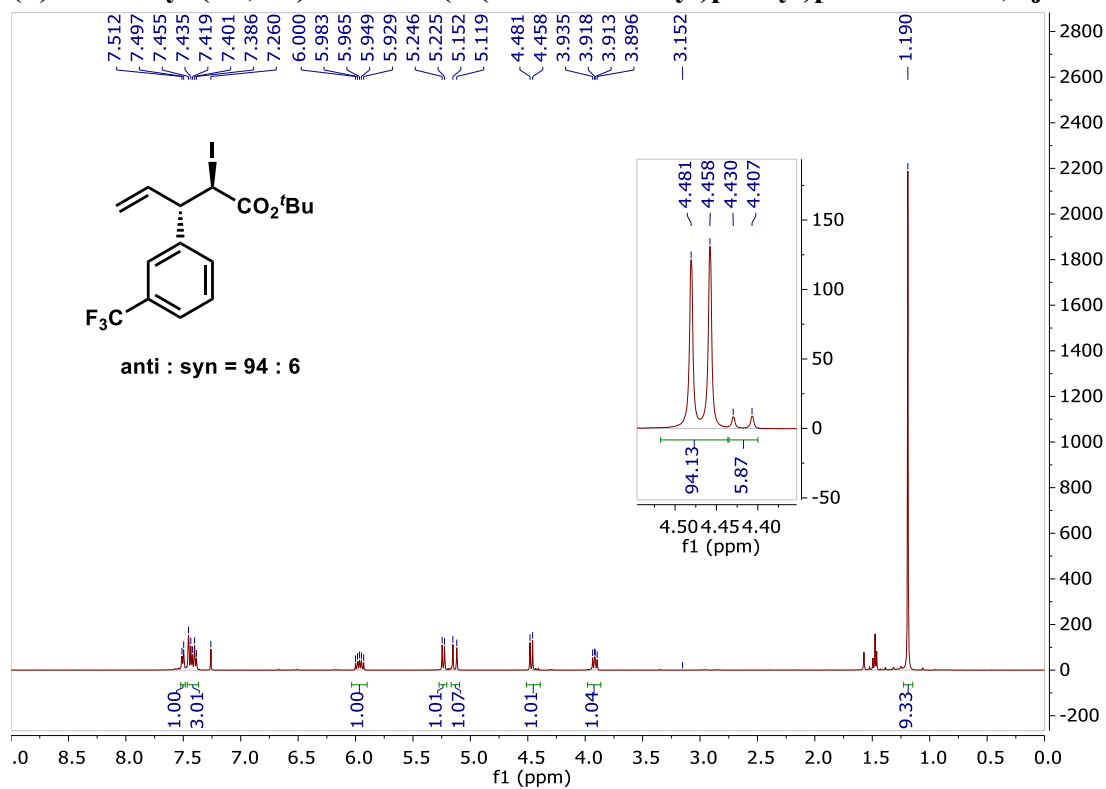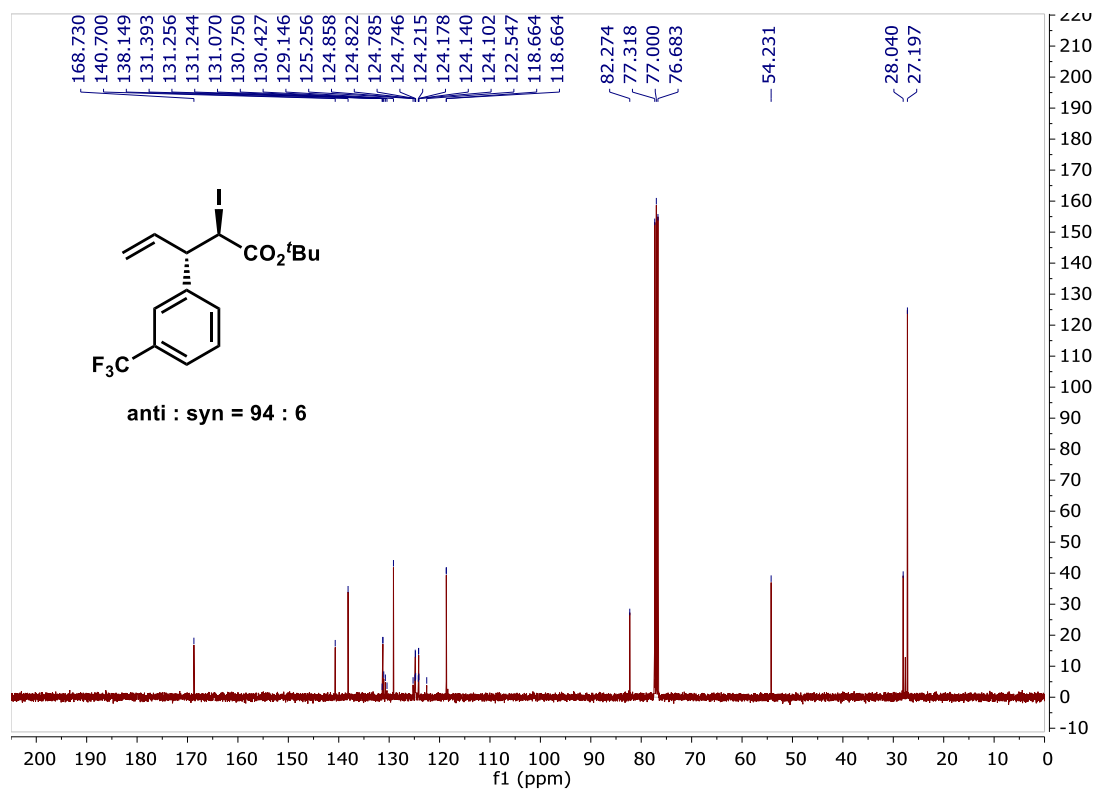

**(+)-*tert*-Butyl (2*R*, 3*S*)-2-iodo-3-(*m*-tolyl)pent-4-enoate, 5k**

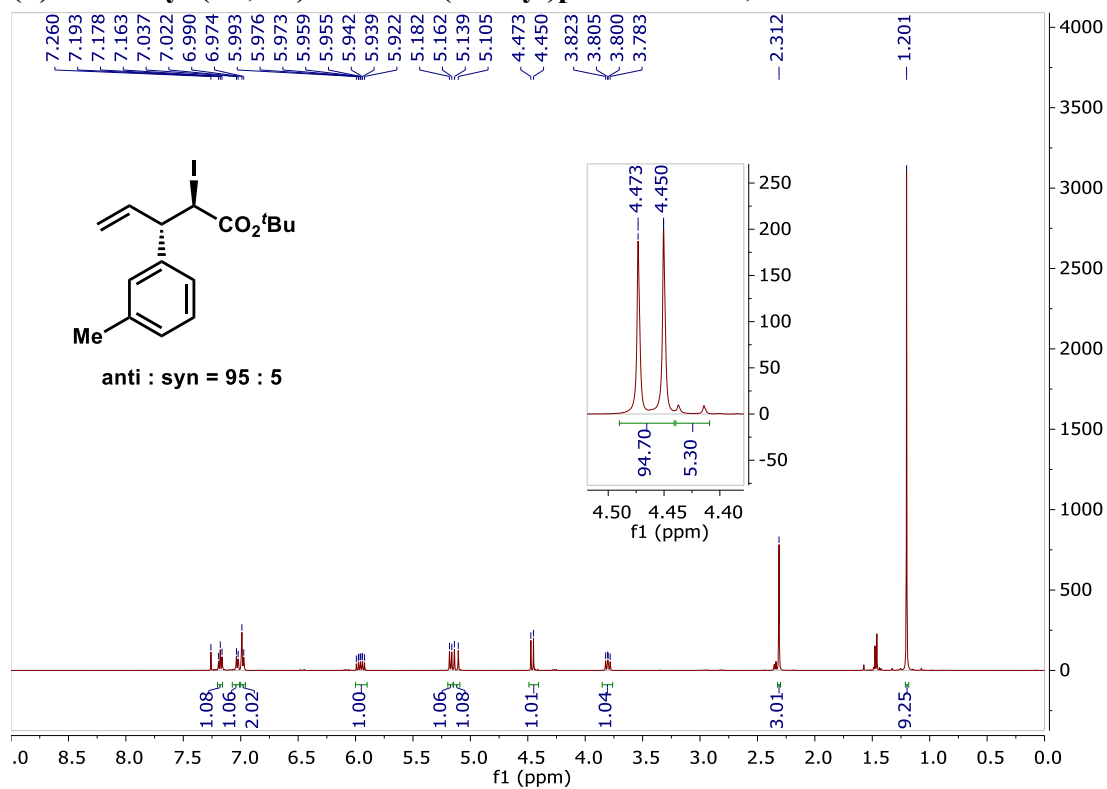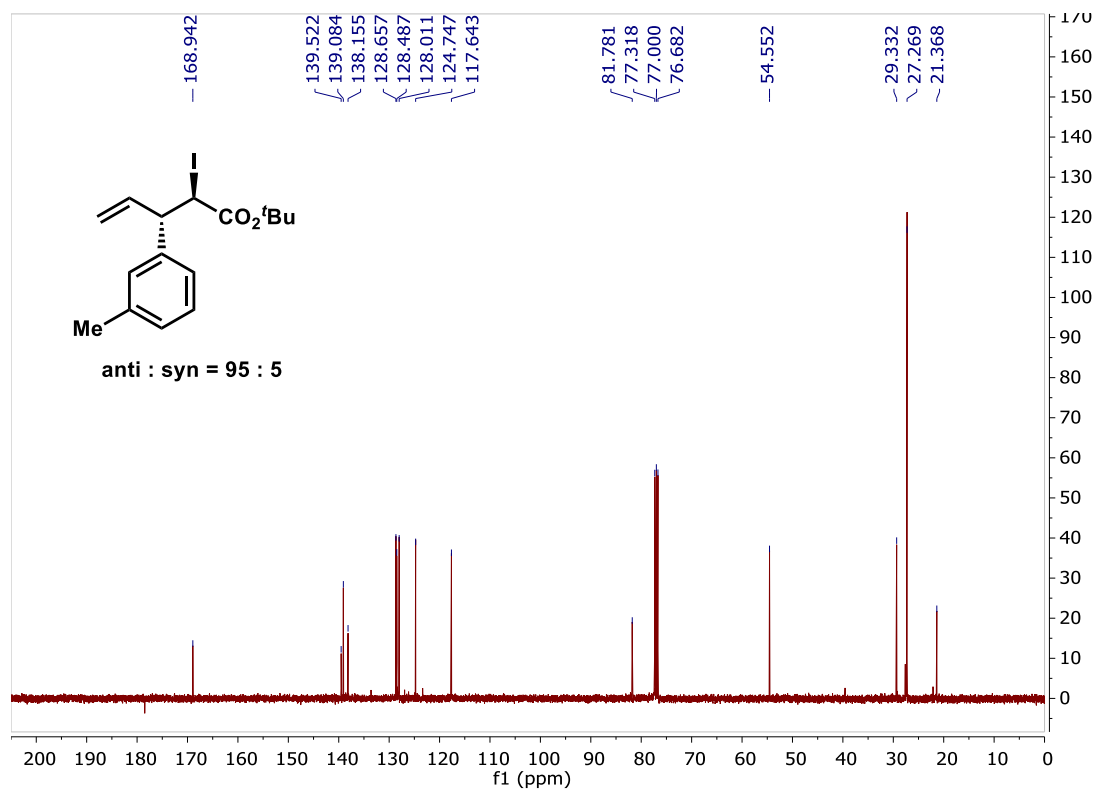

**(+)-*tert*-Butyl (2*R*, 3*S*)-3-(2-chlorophenyl)-2-iodopent-4-enoate, 5l**

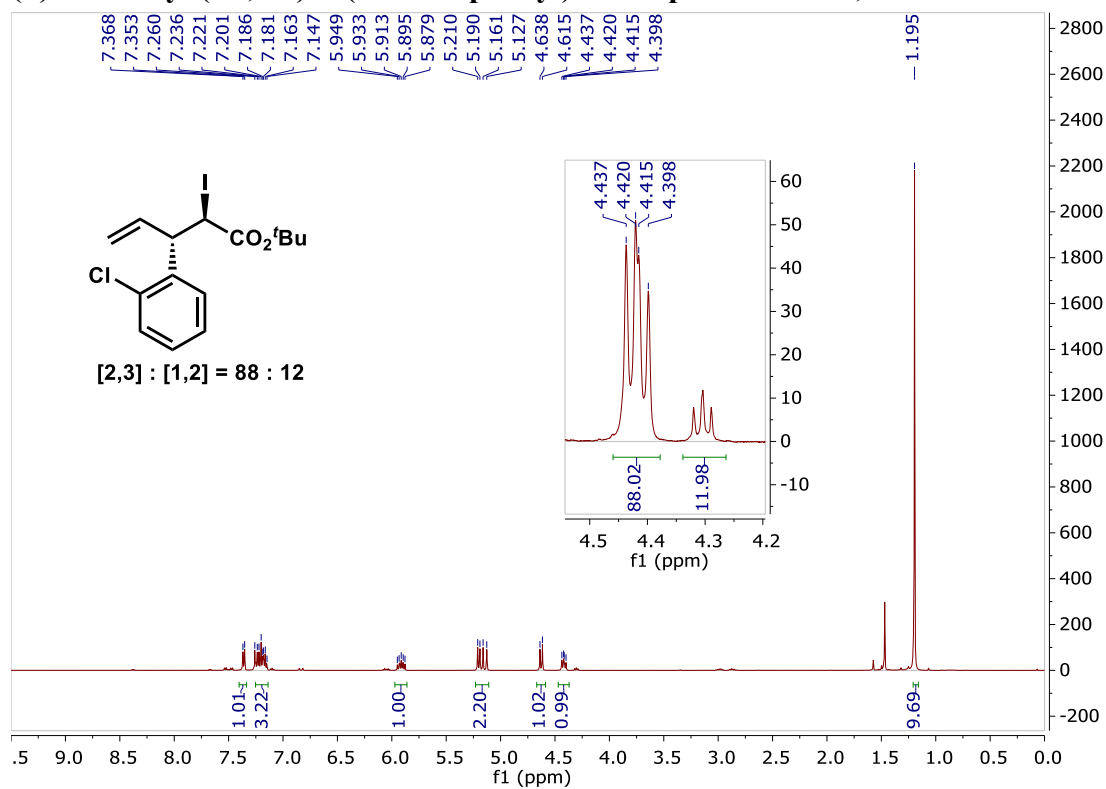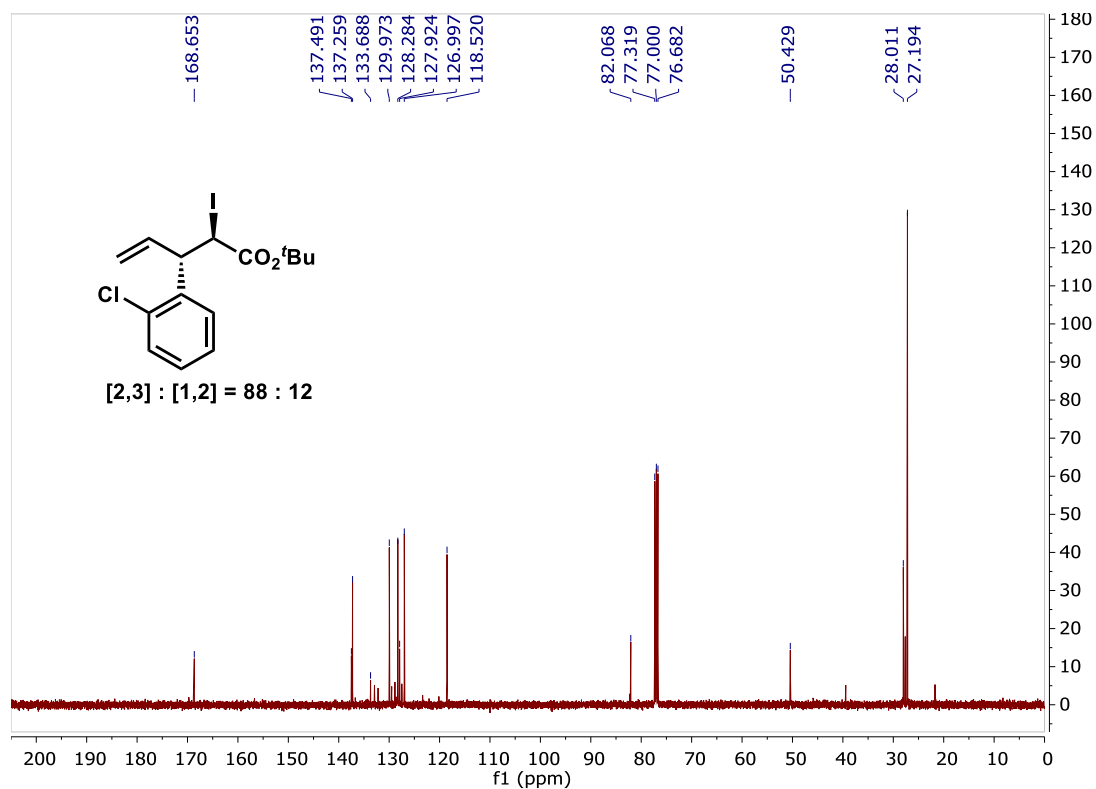

**(+)-*tert*-Butyl (2*R*, 3*S*)-3-(2-bromophenyl)-2-iodopent-4-enoate, 5m**

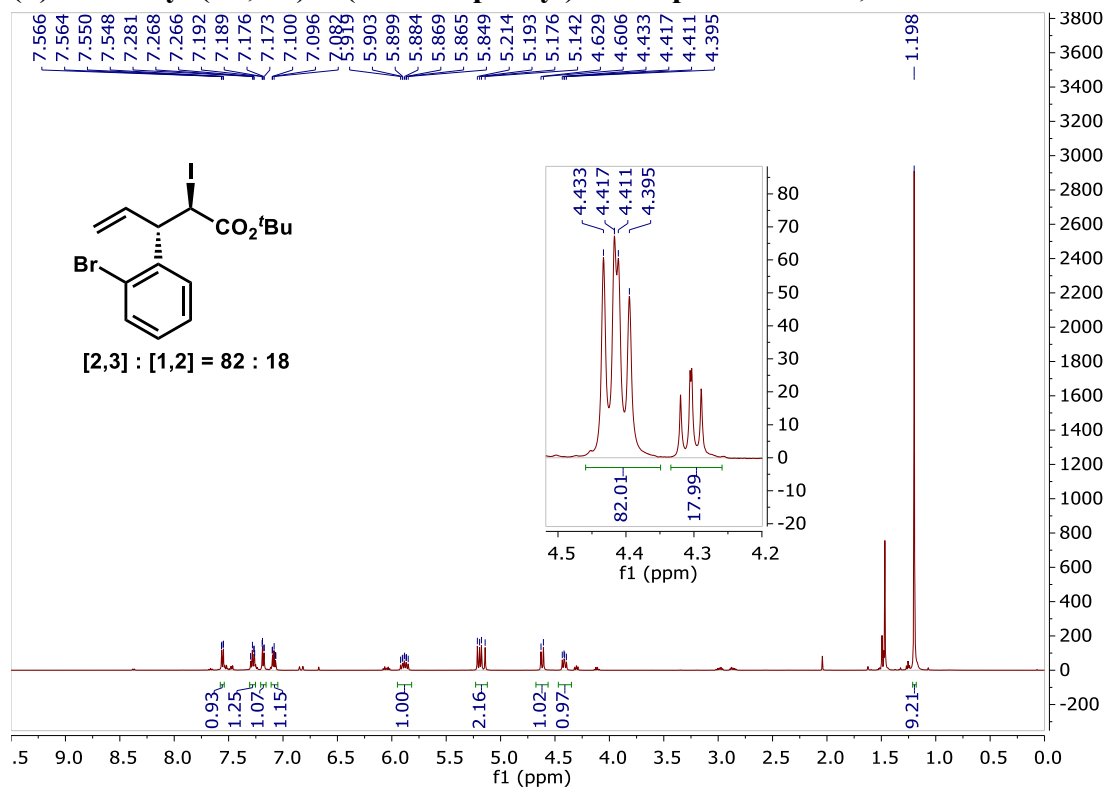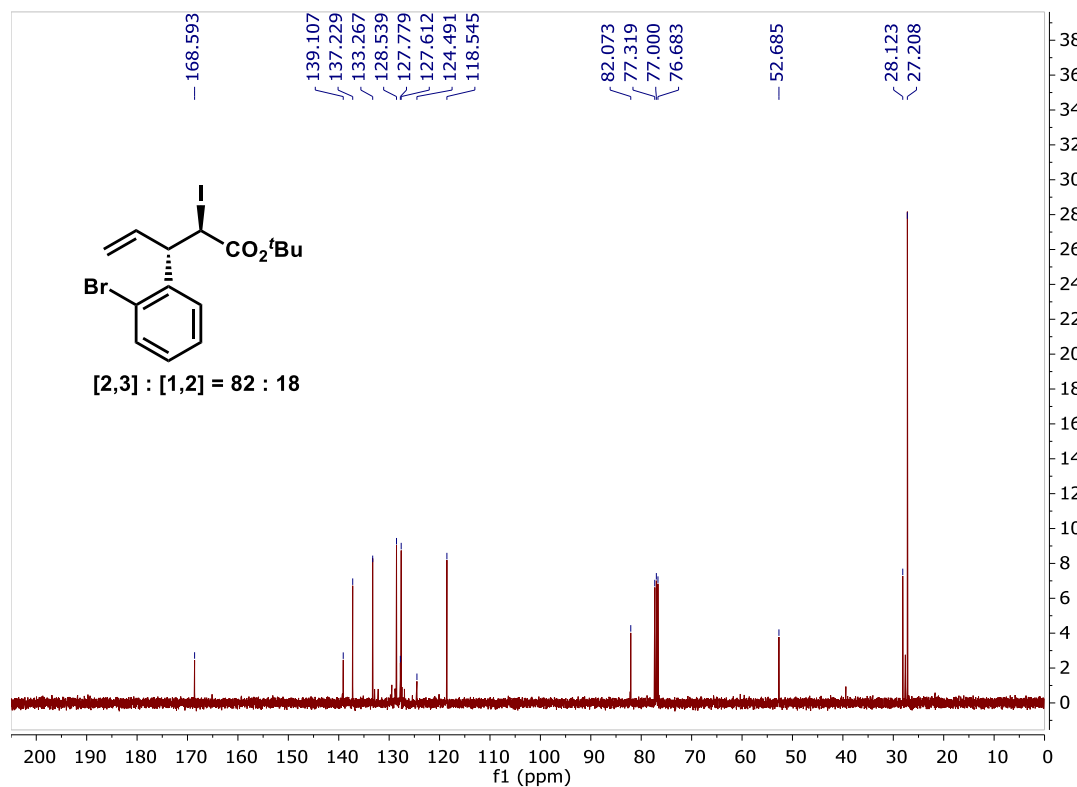

**(+)-tert-Butyl (2*R*, 3*R*)-3-ethyl-2-iodopent-4-enoate, 5n**

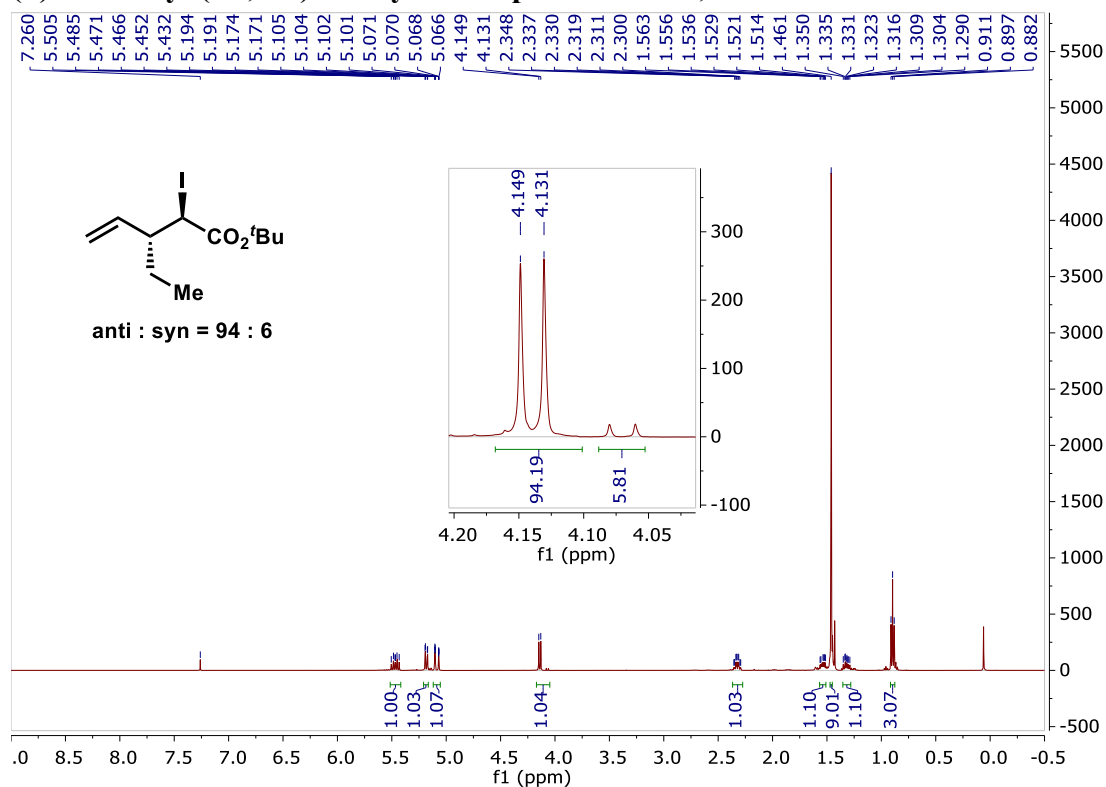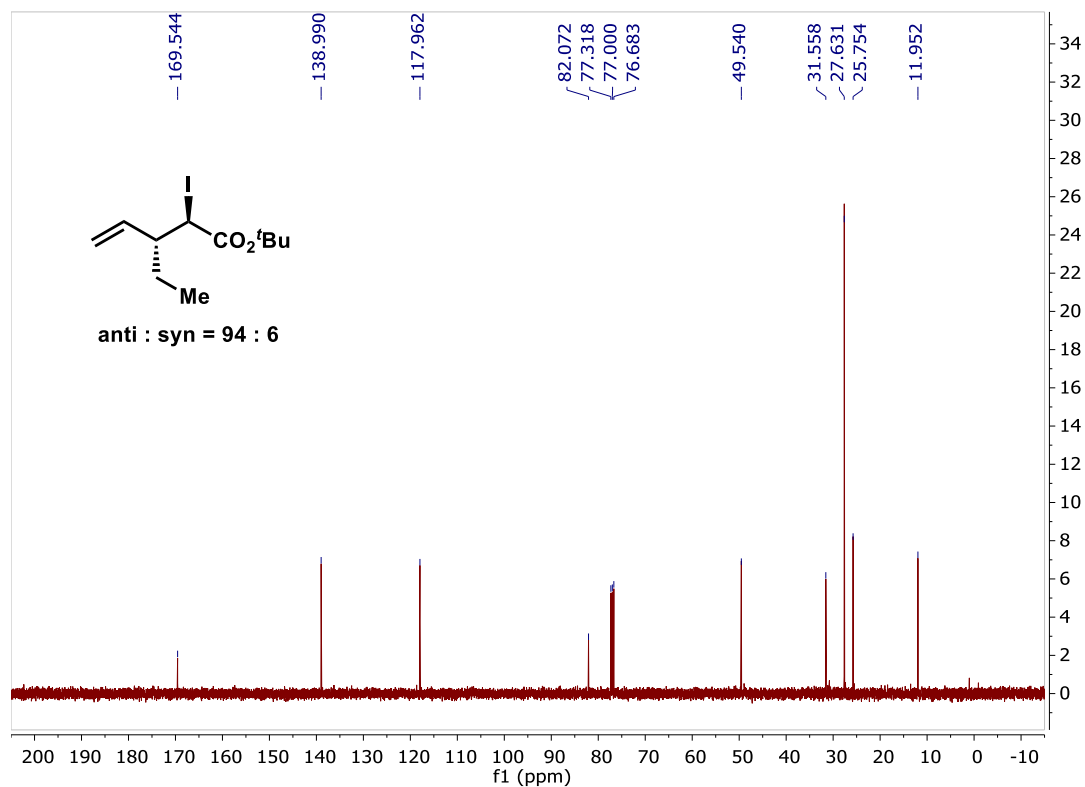



**(+)-*tert*-Butyl (2*R*, 3*R*)-2-iodo-3-vinylnonanoate, 5o**

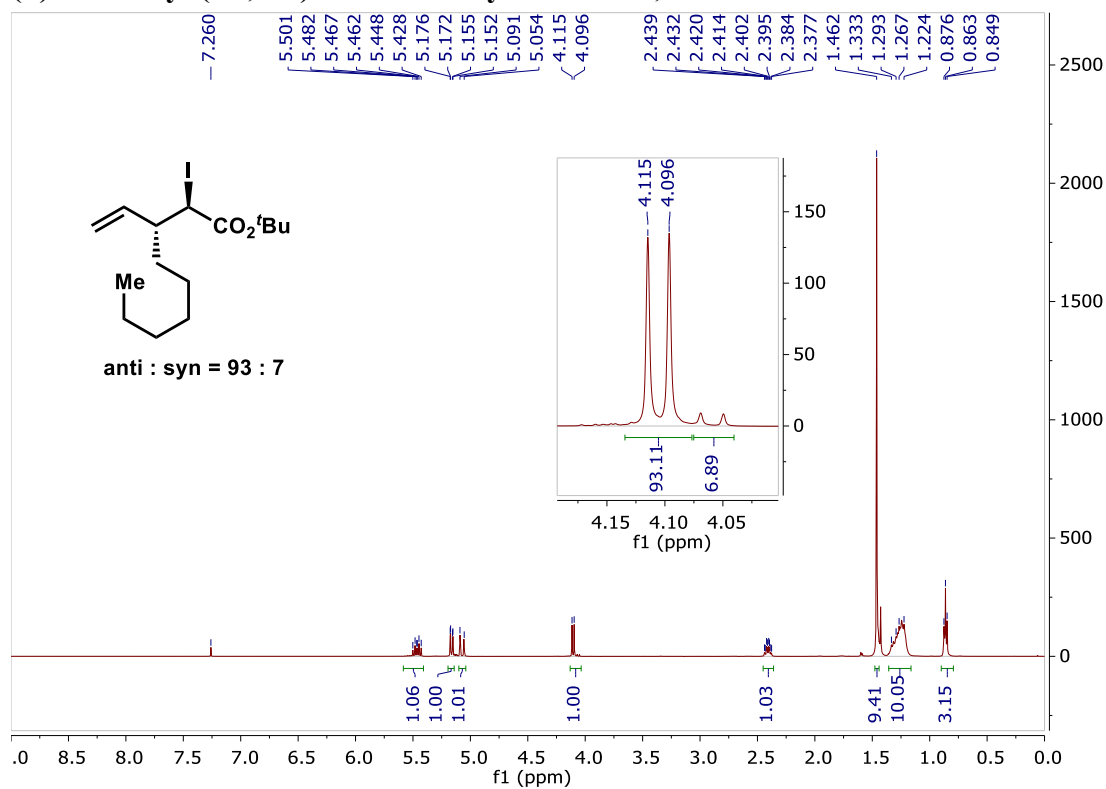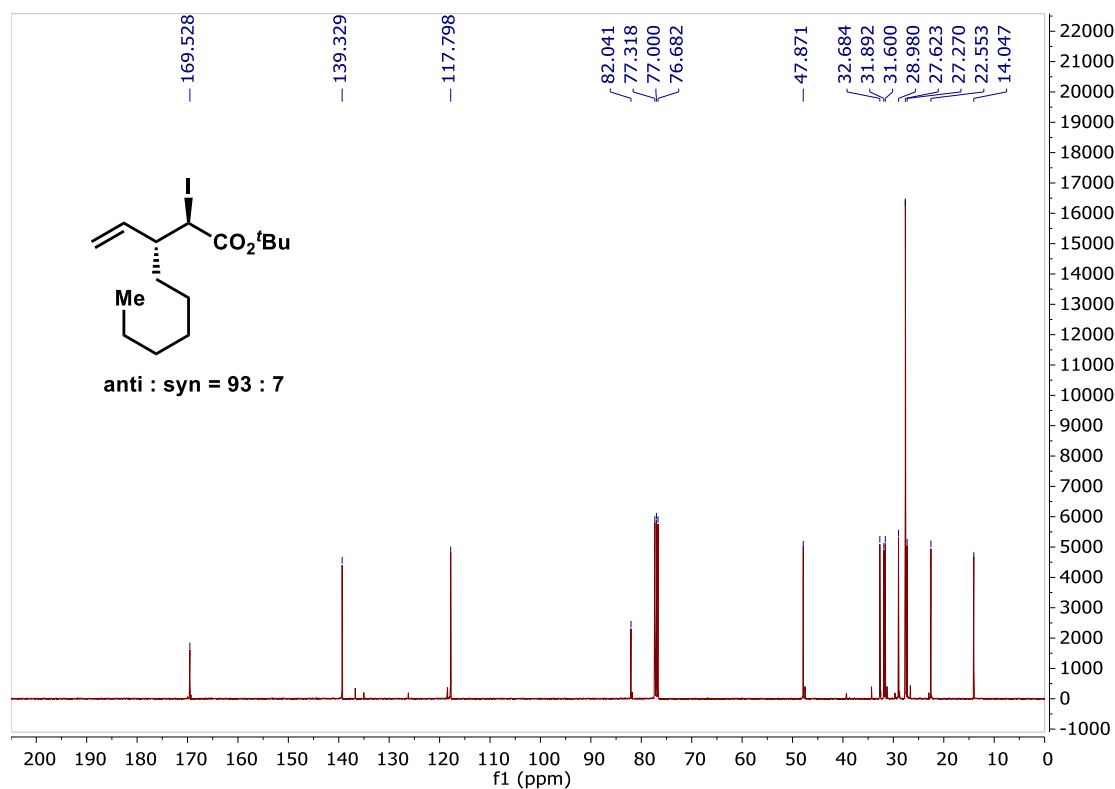

(+)-*tert*-Butyl

(2*R*,

3*S*)-3-(((*tert*-butyldimethylsilyl)oxy)methyl)-2-iodopent-4-enoate, 5p

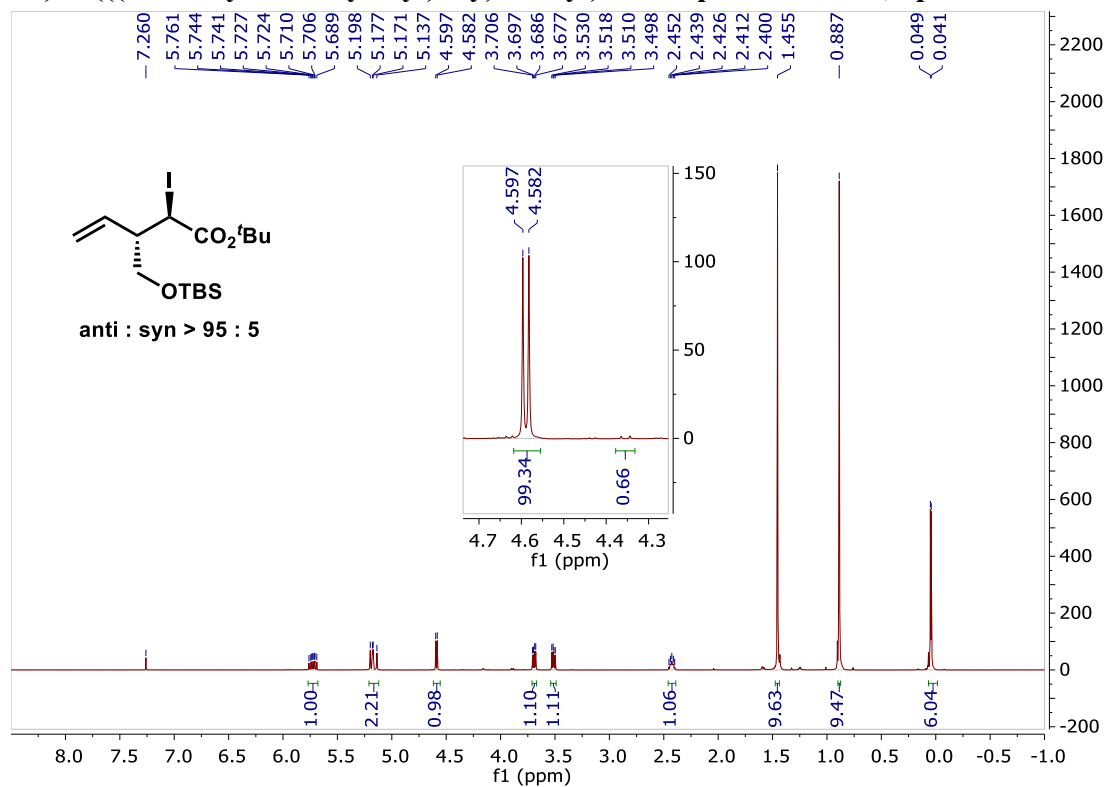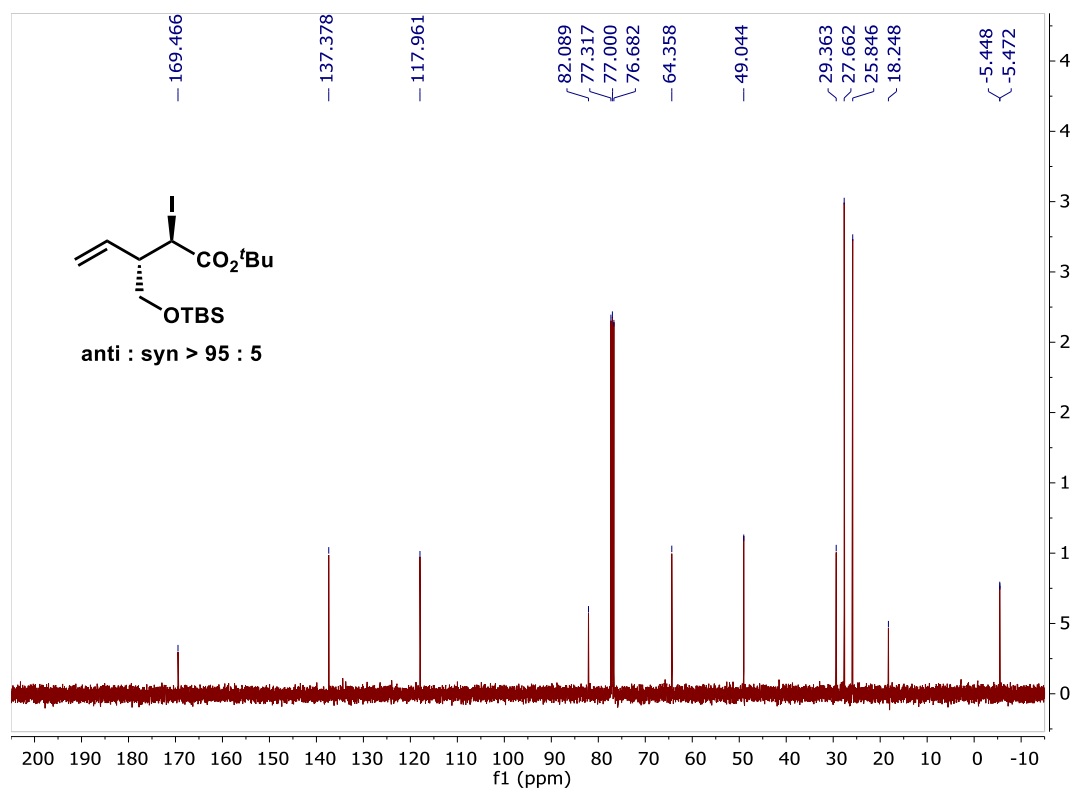

**(+)-*tert*-Butyl (2*R*, 3*S*)-3-(chloromethyl)-2-iodopent-4-enoate, 5q**

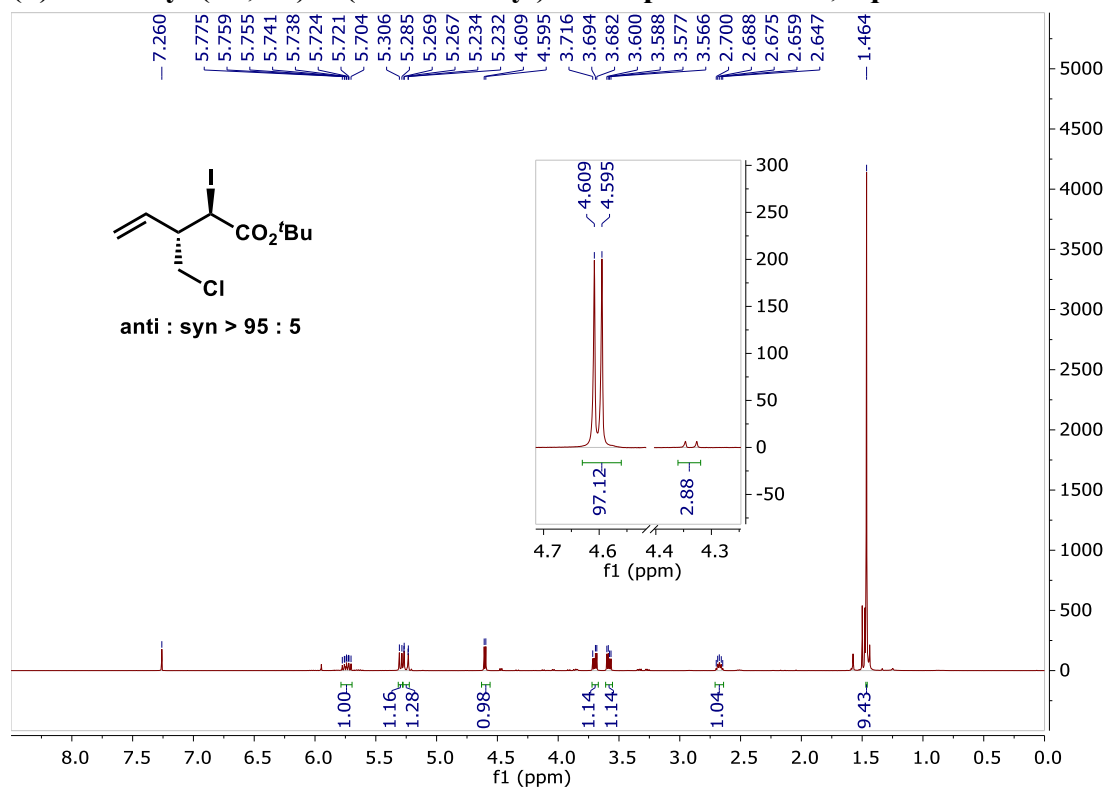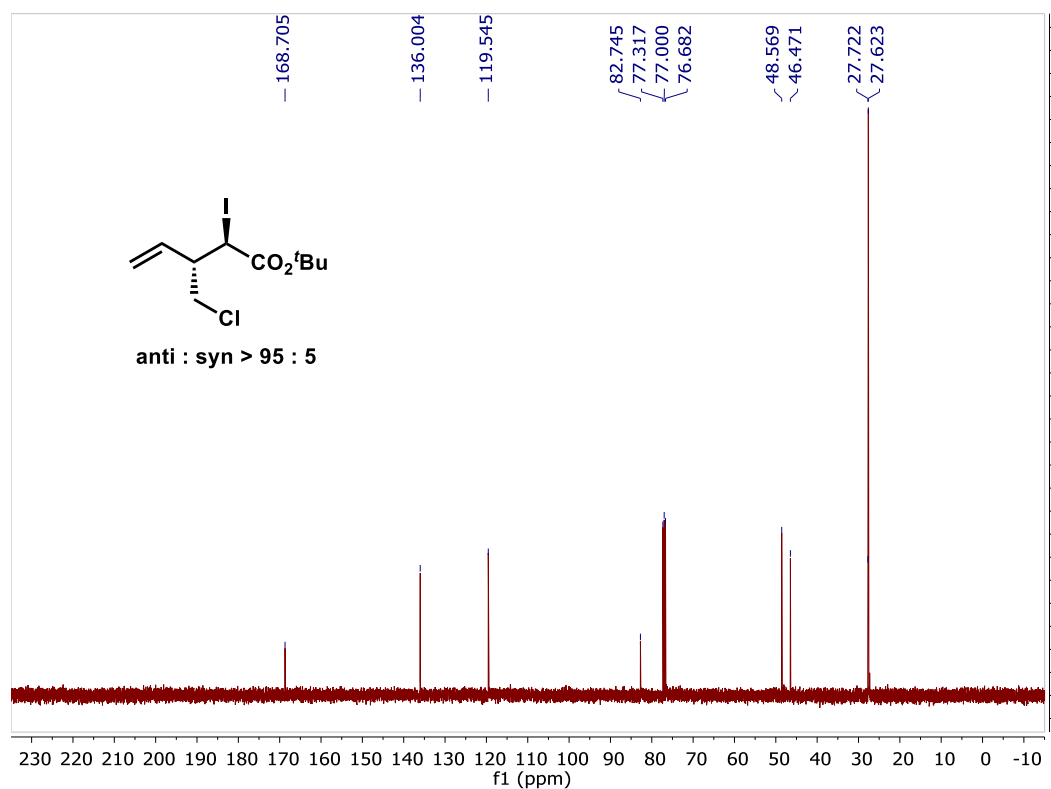

**(+)-tert-Butyl** **(2R,**  
**3S)-2-iodo-3-(((4-methyl-N-phenylphenyl)sulfonamido)methyl)pent-4-enoate, 5r**

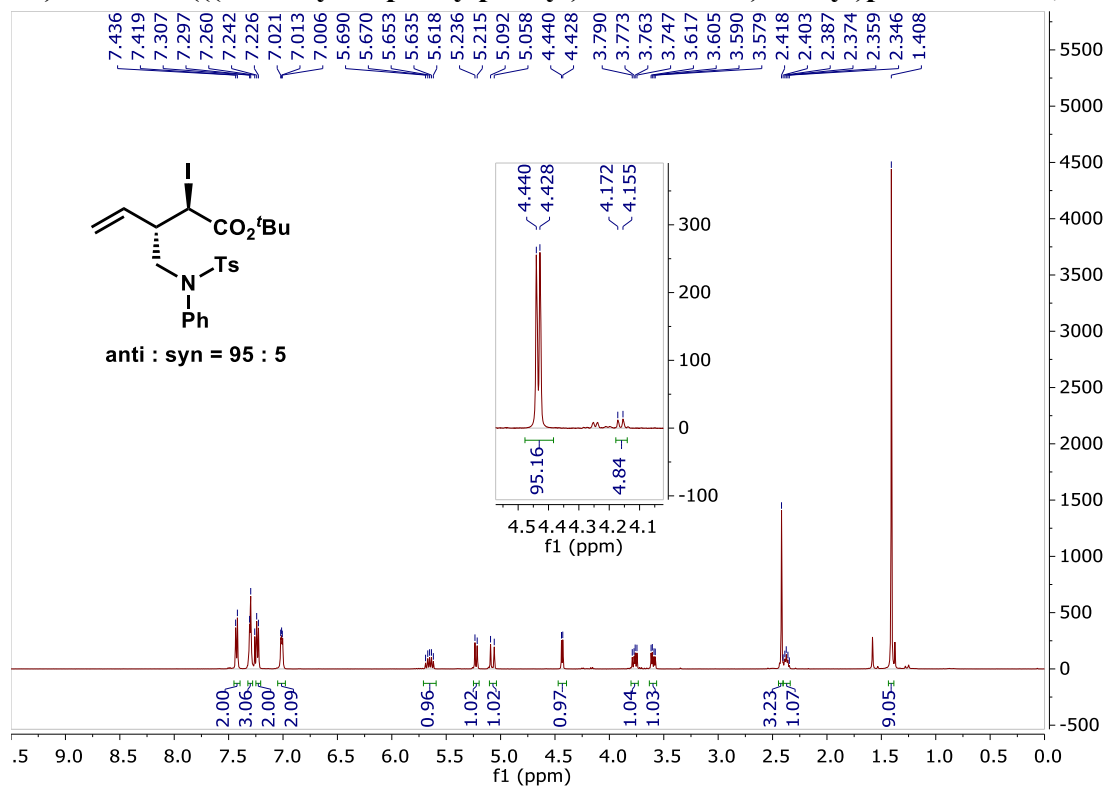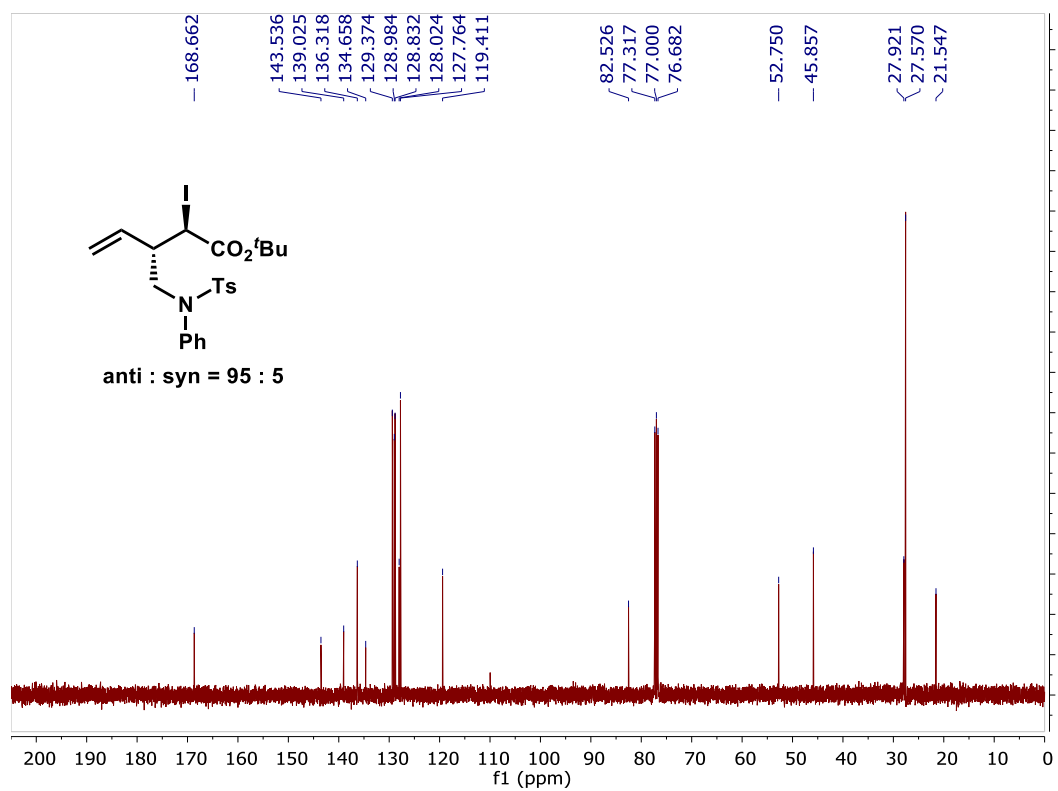

**(+)-*tert*-Butyl (*R*)-2-iodo-3,3-dimethylpent-4-enoate, 5s**

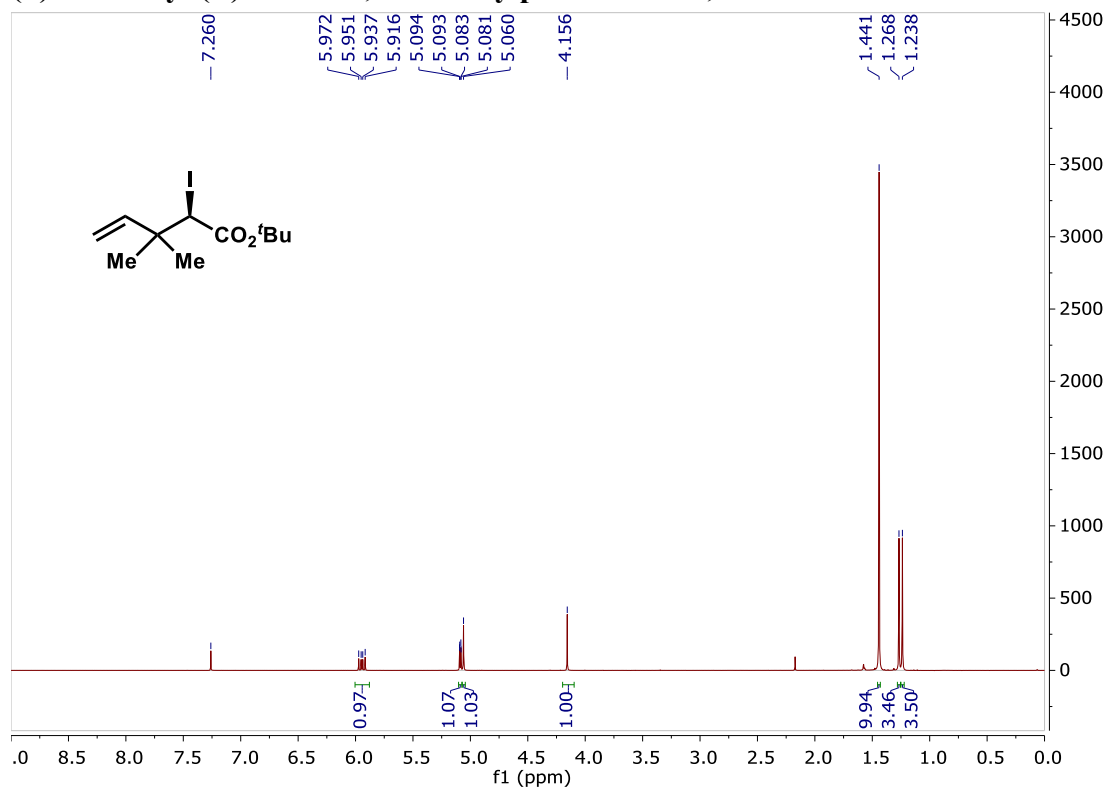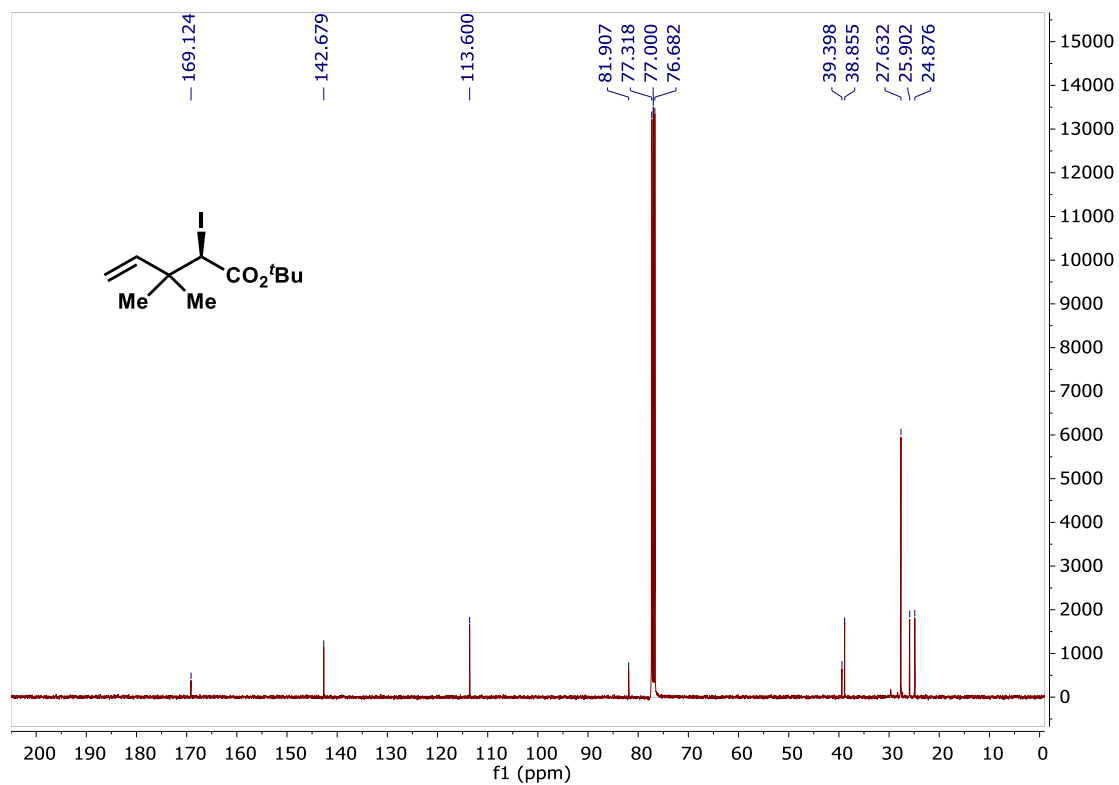

**(+)-*tert*-Butyl (*R*)-2-iodo-2-(1-vinylcyclopentyl)acetate, 5t**

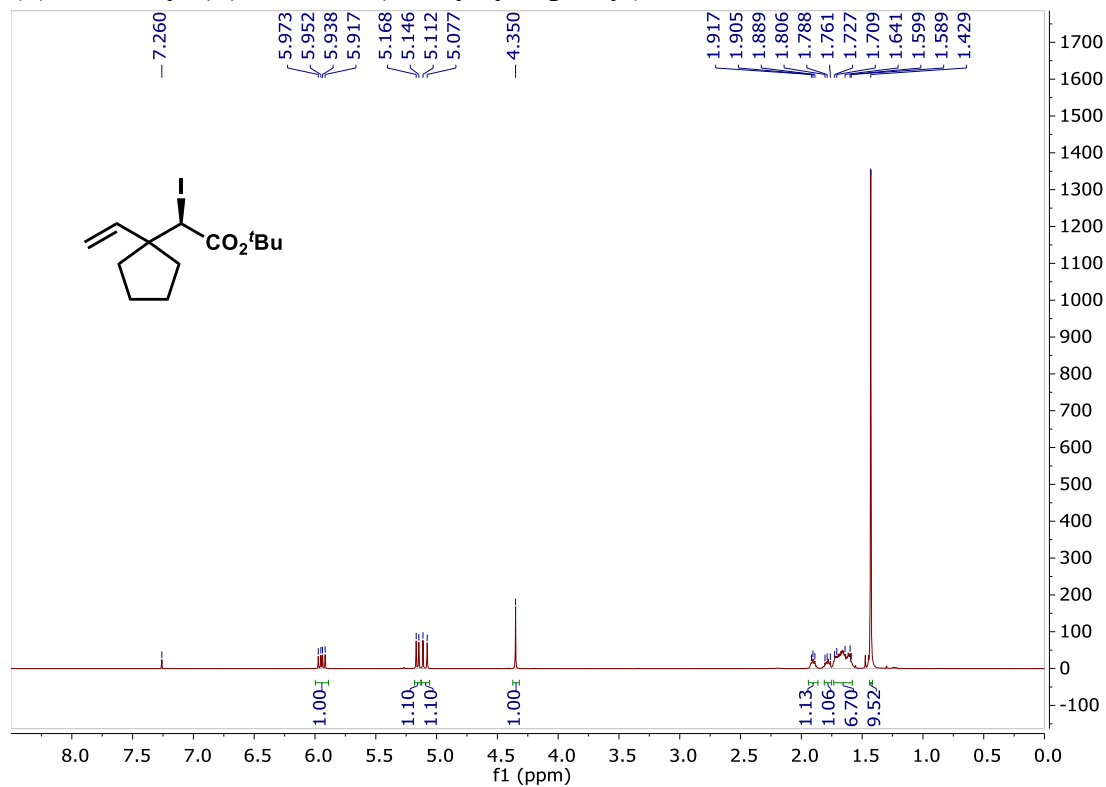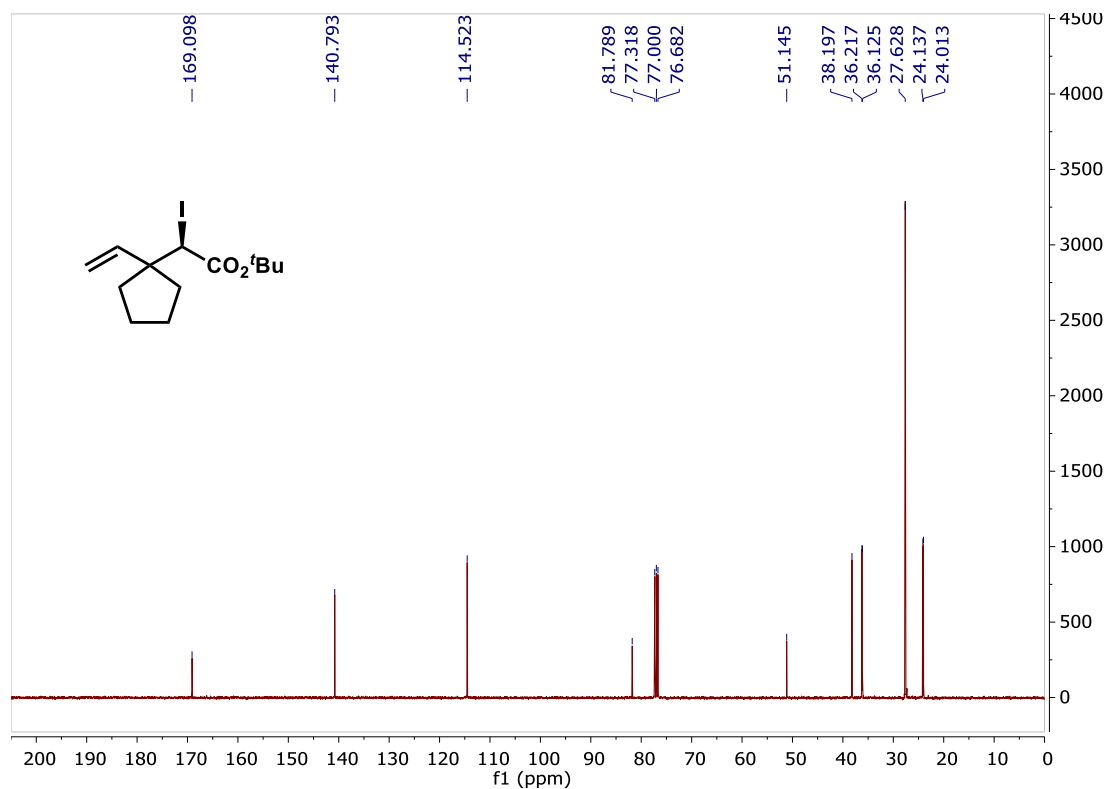

**(+)-tert-Butyl (R)-2-iodo-2-(1-vinylcyclohexyl)acetate, 5u**

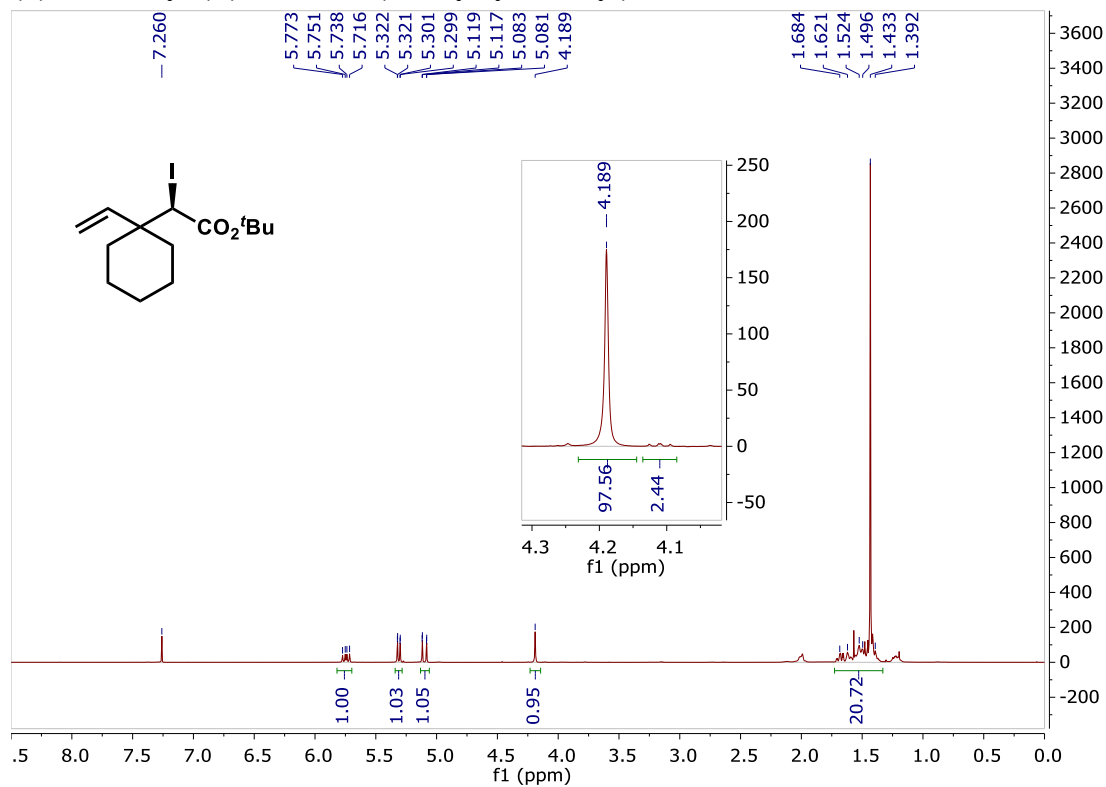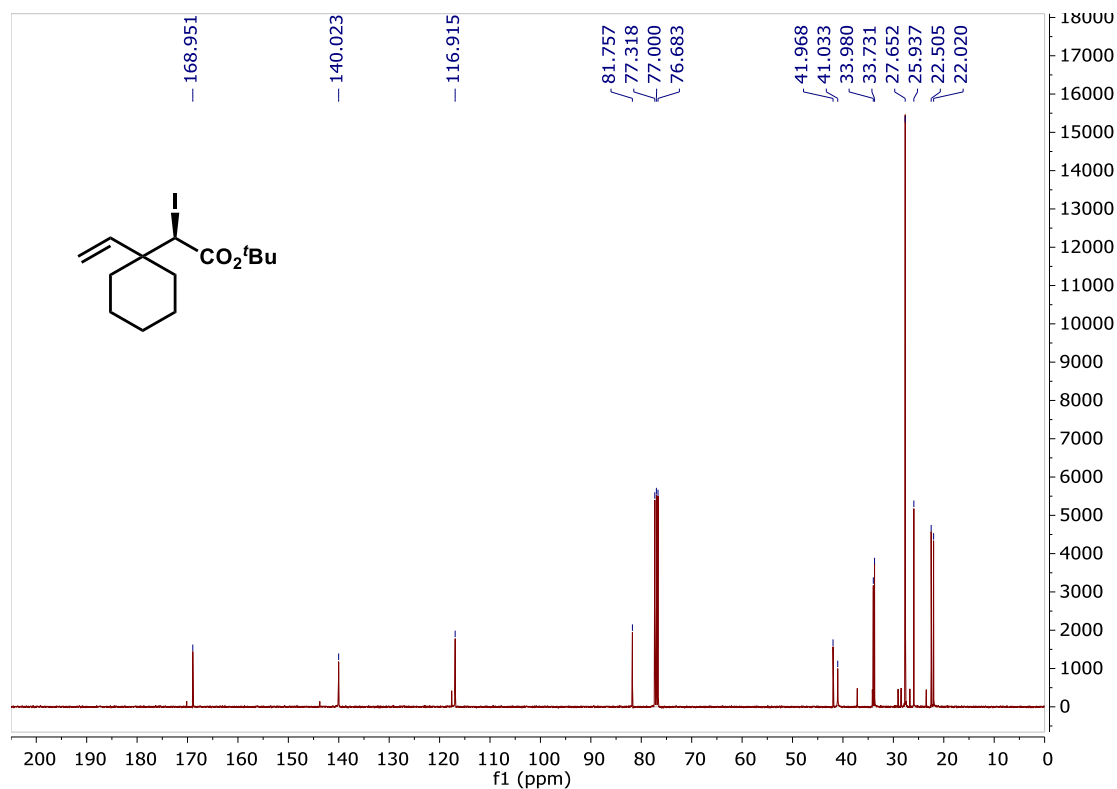

**(+)-*tert*-Butyl (*R*)-2-iodo-2-(1-vinylcycloheptyl)acetate, 5v**

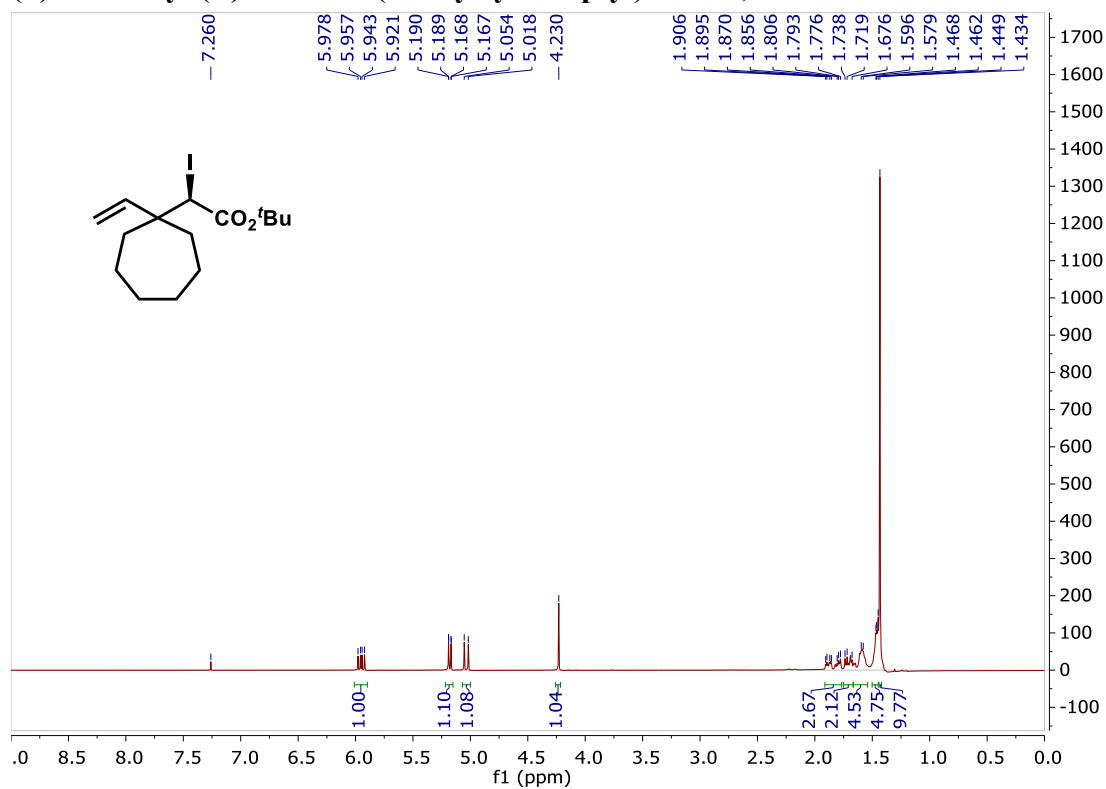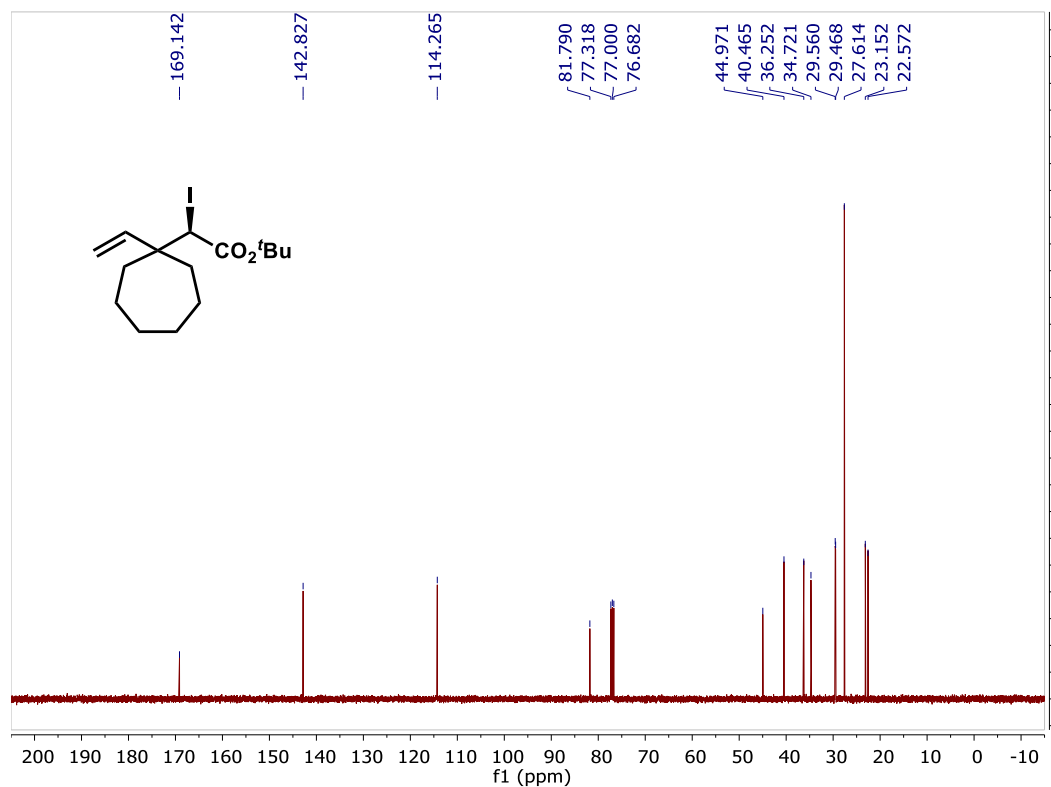



**(+)-*tert*-Butyl (*R*)-2-iodo-2-(4-vinyltetrahydro-2H-pyran-4-yl)acetate, 5w**

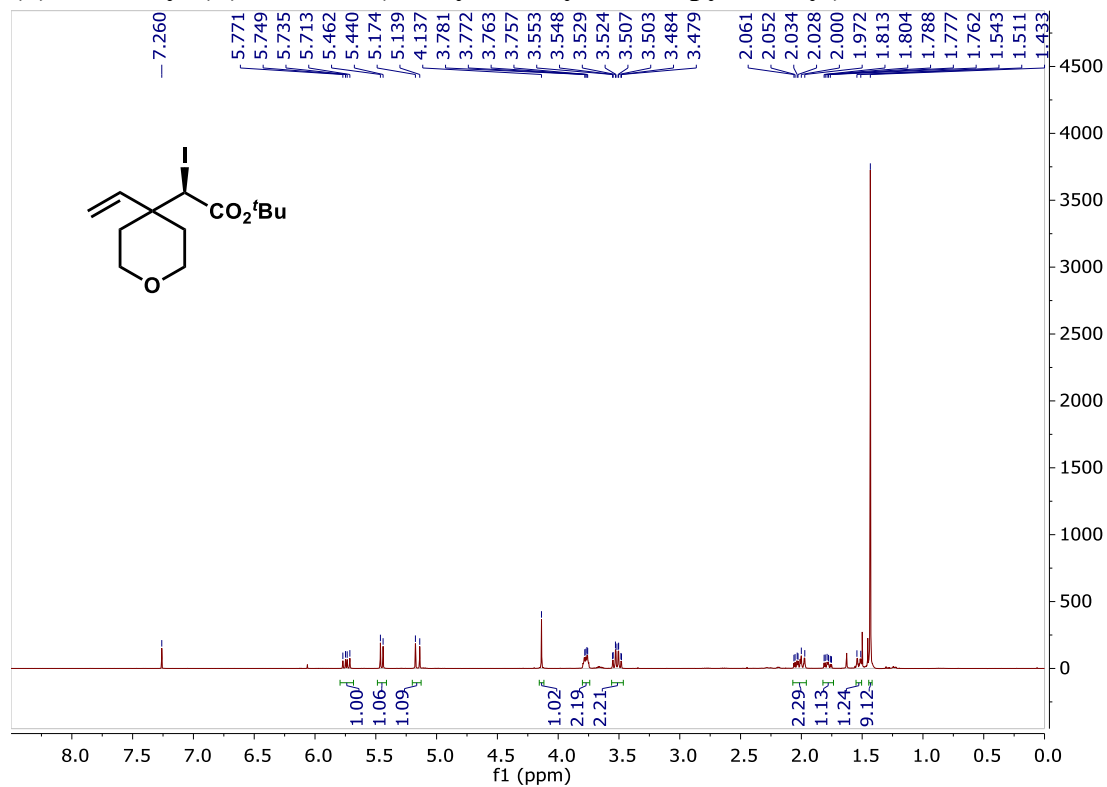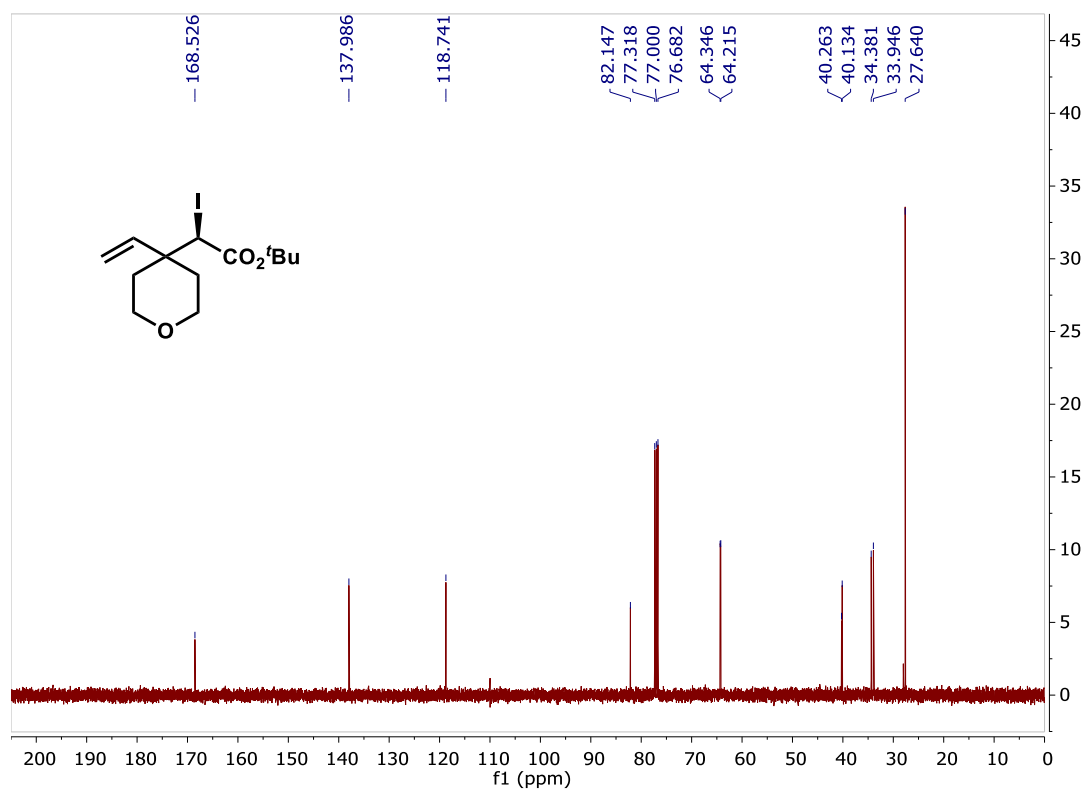

(+)-*tert*-Butyl

(*R*)-4-(2-(*tert*-butoxy)-1-iodo-2-oxoethyl)-4-vinylpiperidine-1-carboxylate, 5x

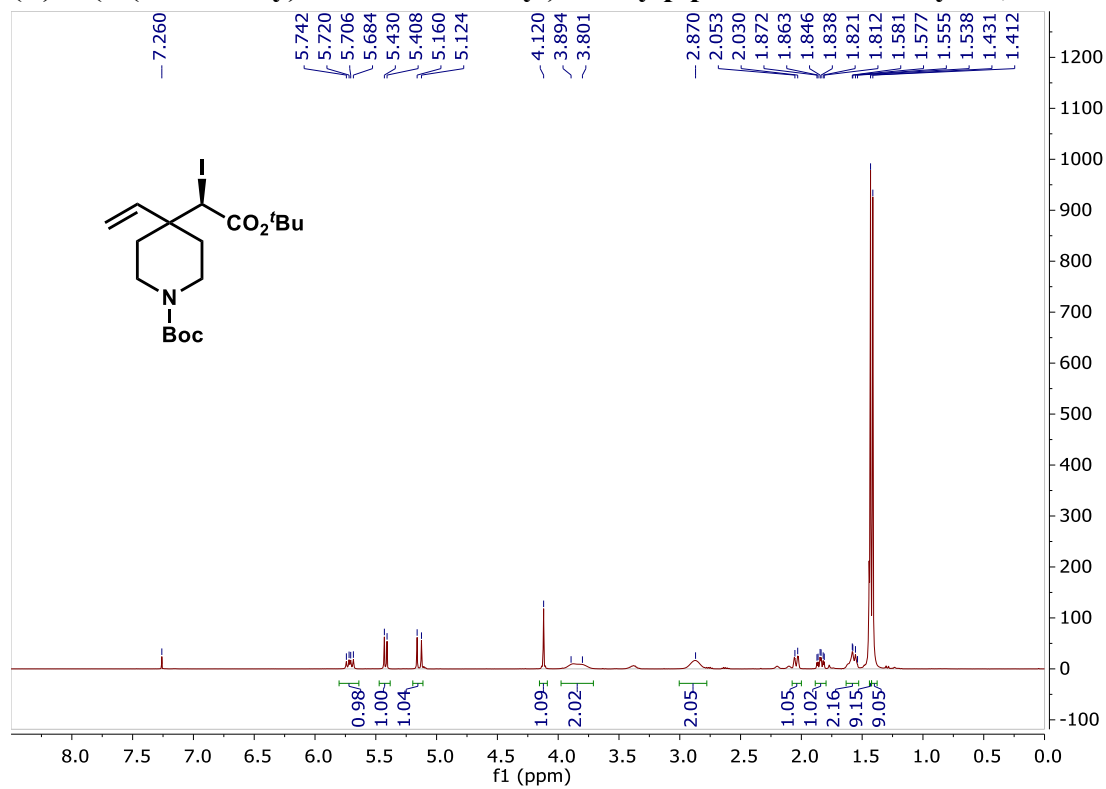

**(+)-*tert*-Butyl (*R*)-2-iodo-2-((*R*)-2-methylenecyclohexyl)acetate, 5y**

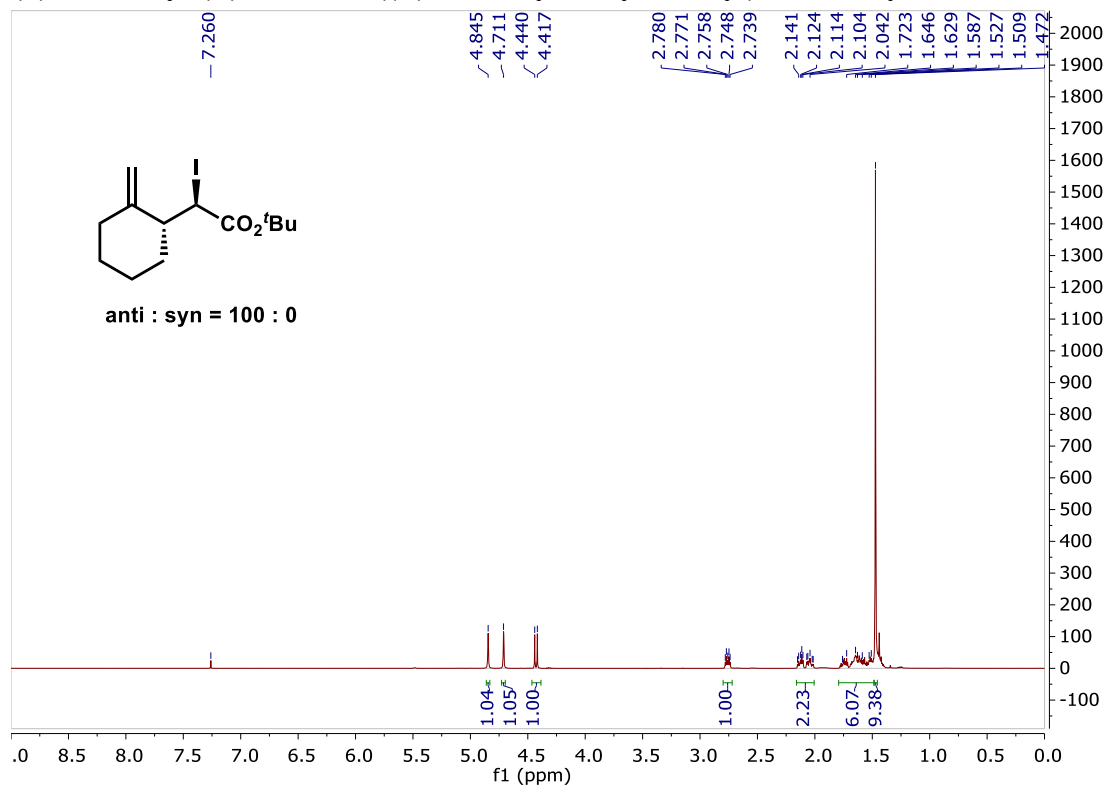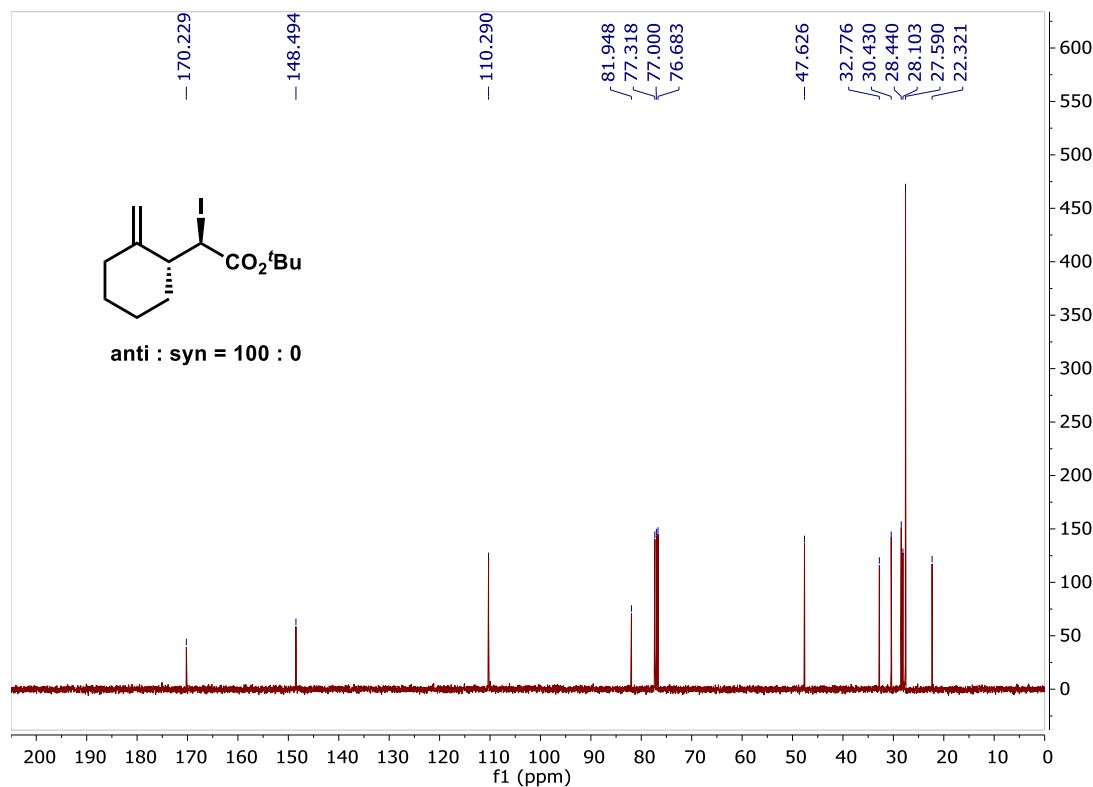

**(+)-*tert*-Butyl (2*R*, 3*S*)-5-hydroxy-2-iodo-3-(naphthalen-1-yl)pentanoate, 6c**

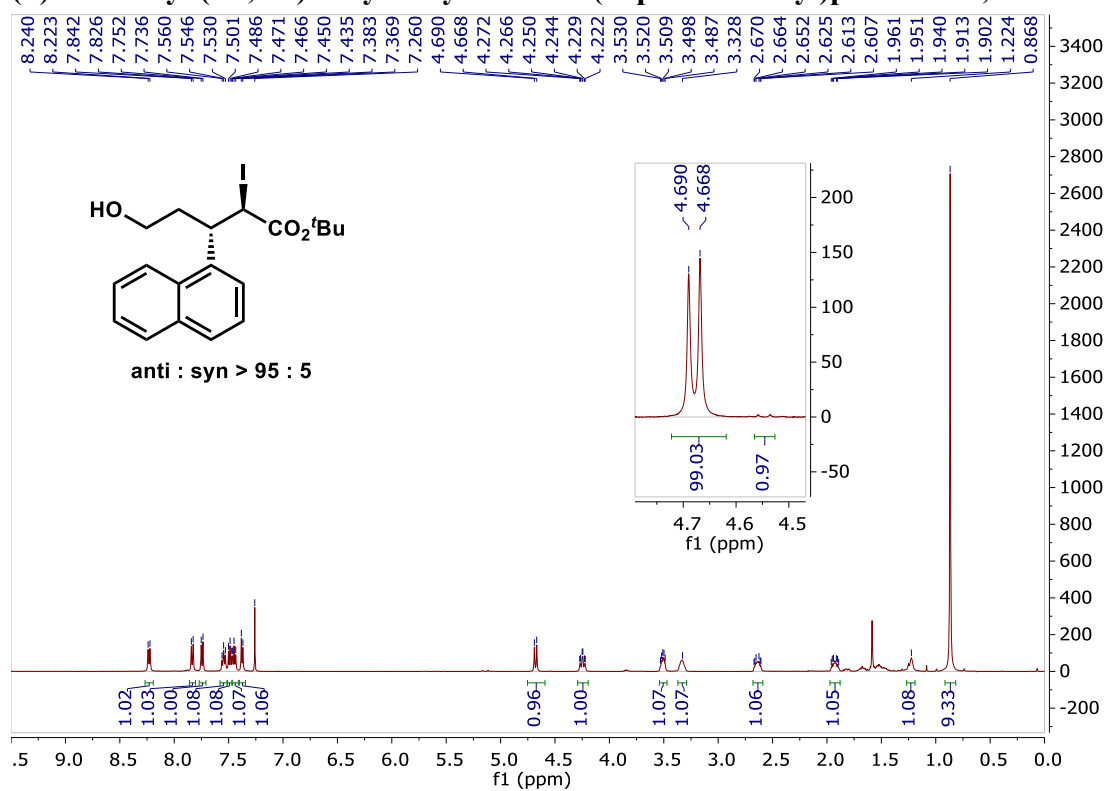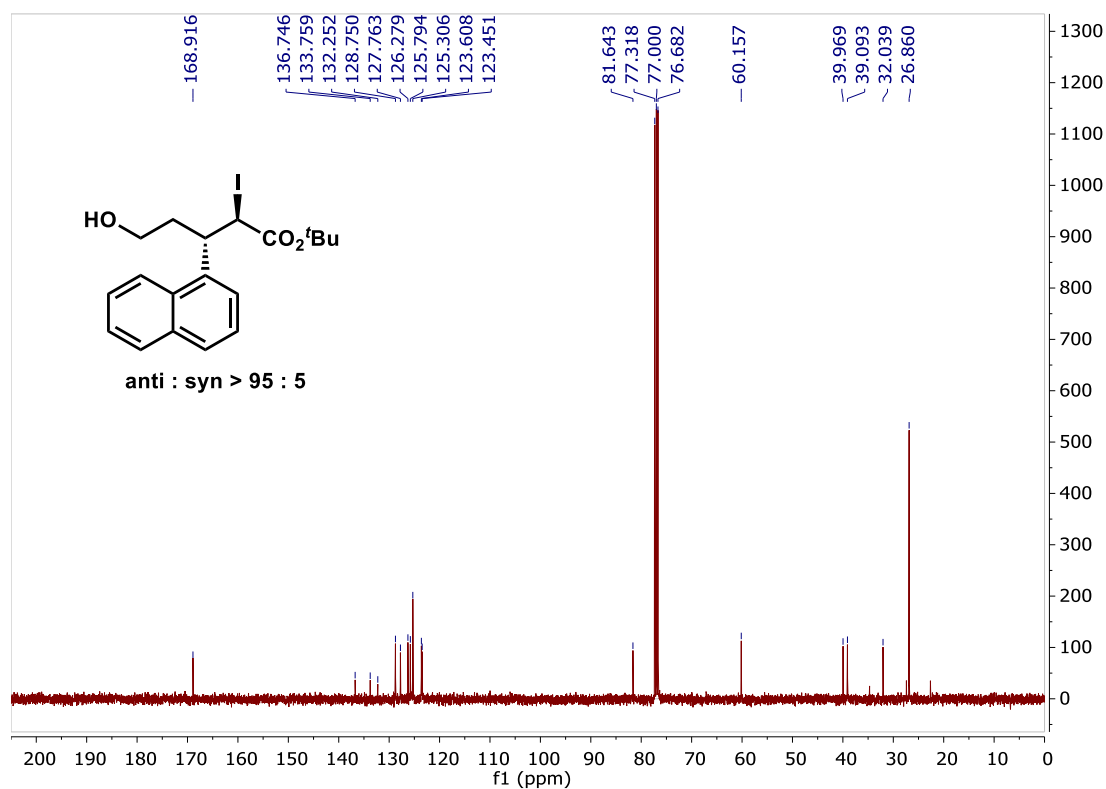

**(+)-*tert*-Butyl (2*R*, 3*S*)-5-hydroxy-2-iodo-3-(naphthalen-2-yl)pentanoate, 6d**

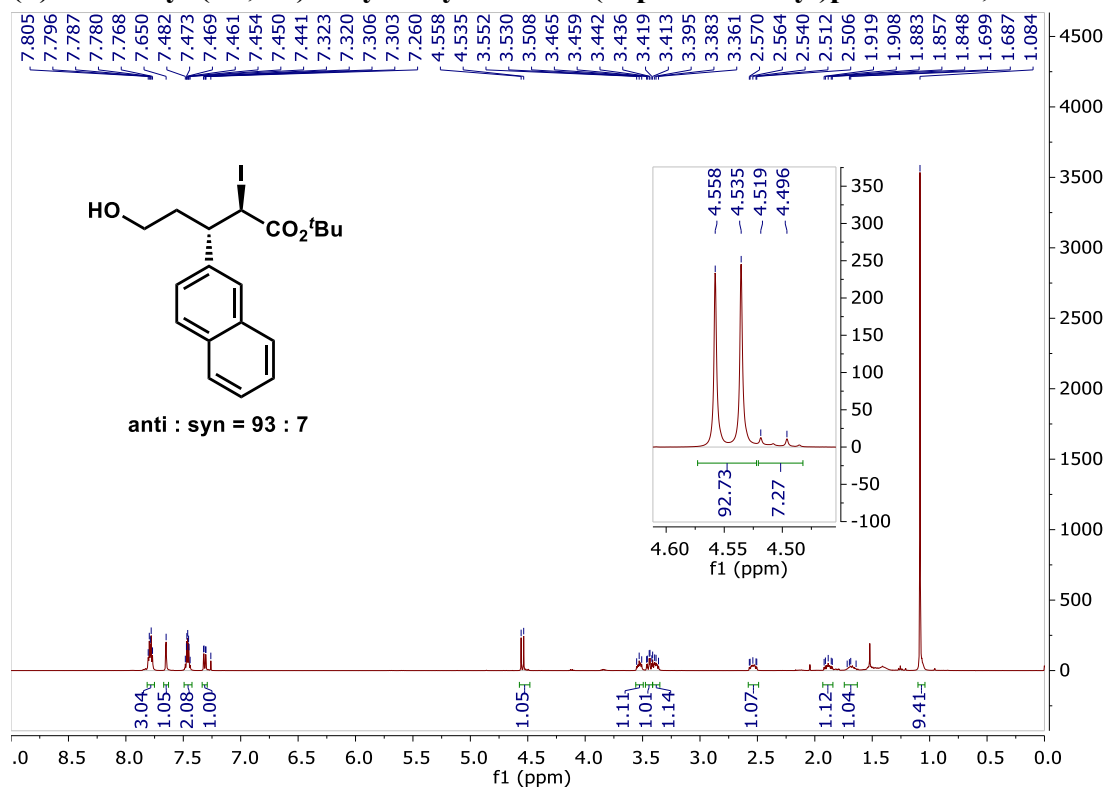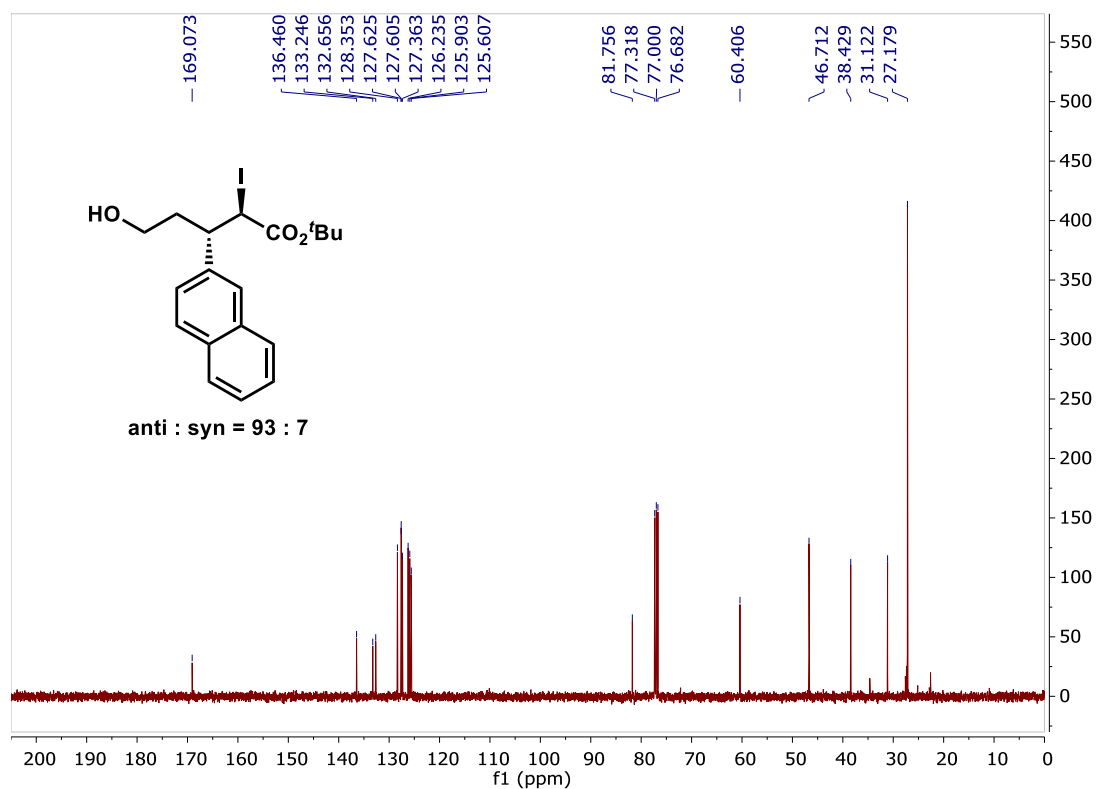

**(+)-*tert*-Butyl (2*R*, 3*S*)-3-(4-fluorophenyl)-5-hydroxy-2-iodopentanoate, 6h**

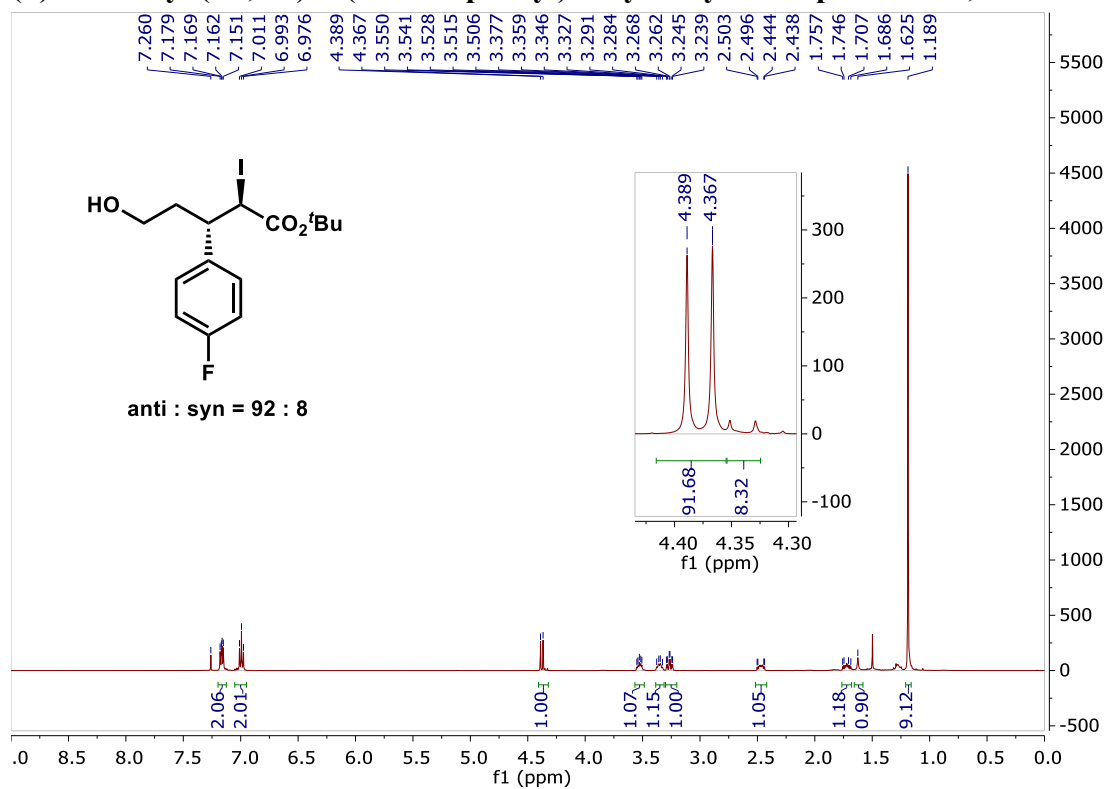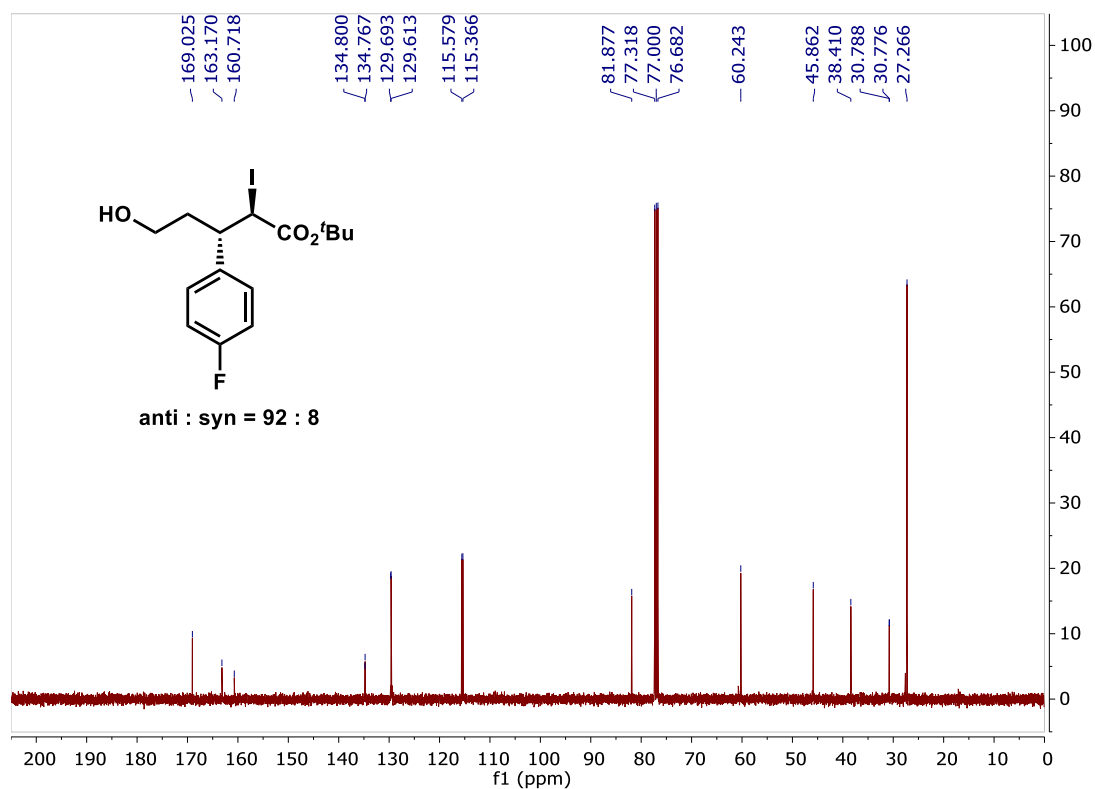

**(+)-*tert*-Butyl (2*R*,  
3*S*)-5-hydroxy-2-iodo-3-(4-(trifluoromethoxy)phenyl)pentanoate, 6i**

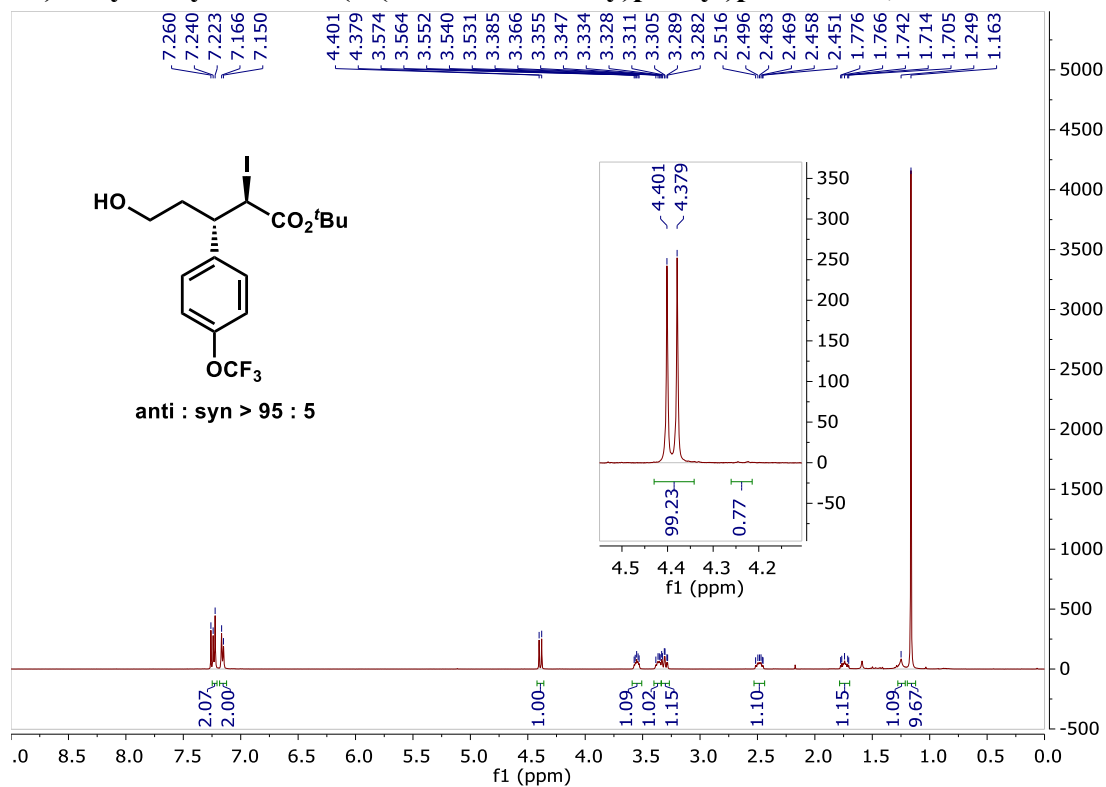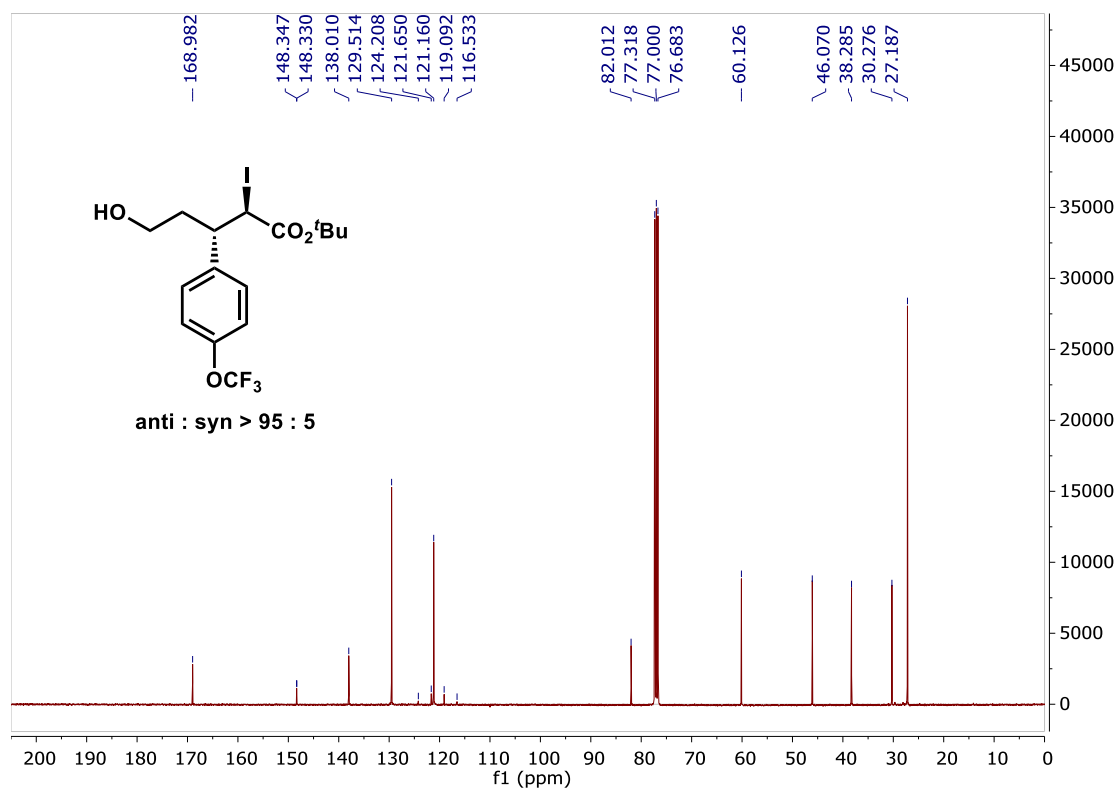

**(+)-*tert*-Butyl (2*R*, 3*S*)-5-hydroxy-2-iodo-3-(3-(trifluoromethyl)phenyl)pentanoate,**

**6j**

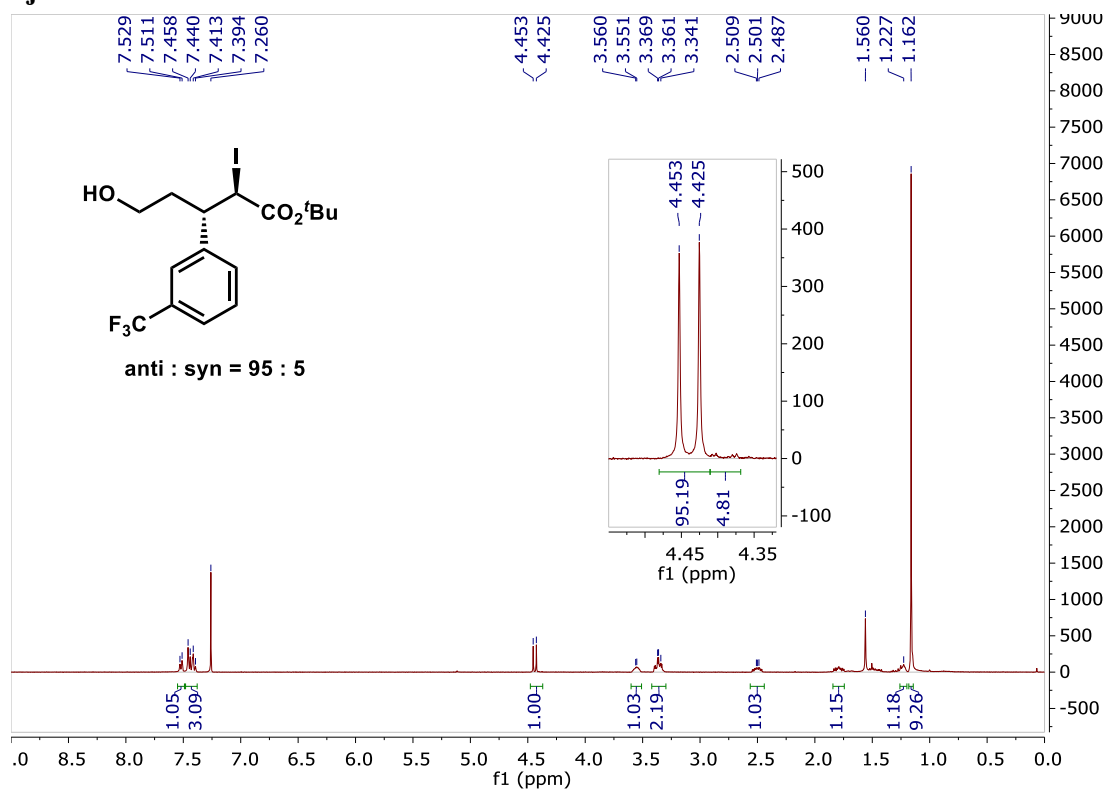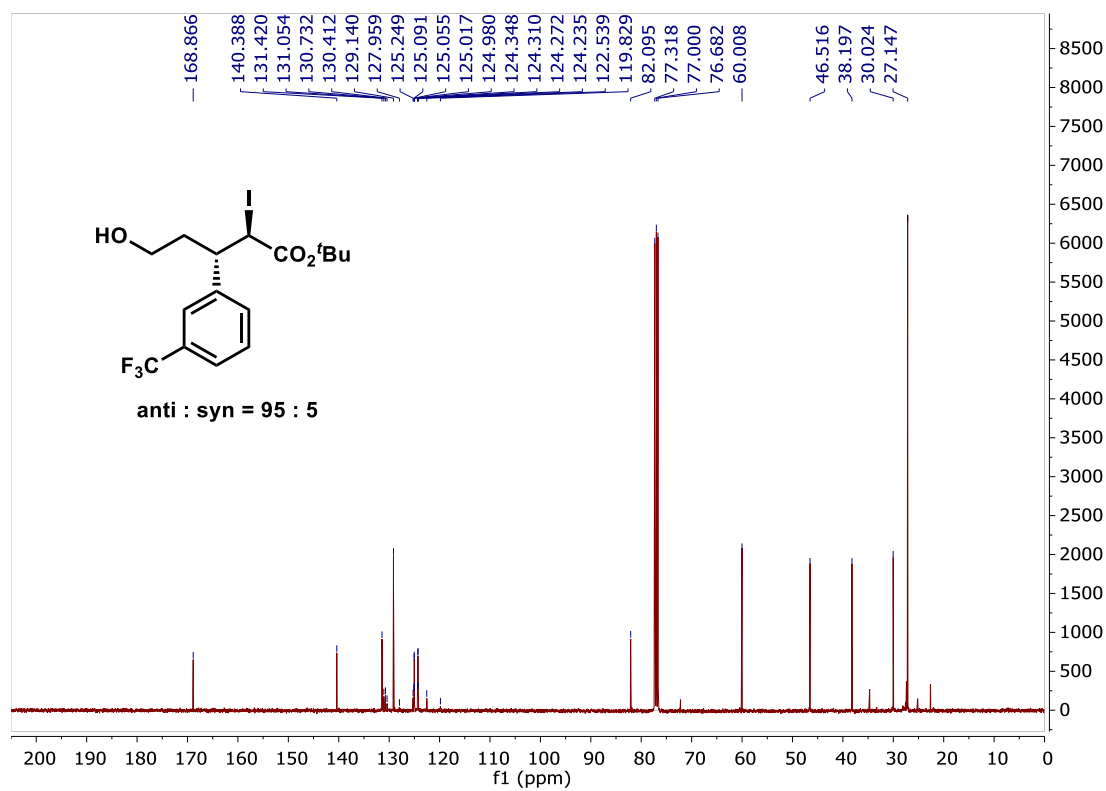



**(+)-*tert*-Butyl (2*R*, 3*S*)-5-hydroxy-2-iodo-3-(*m*-tolyl)pentanoate, 6k**

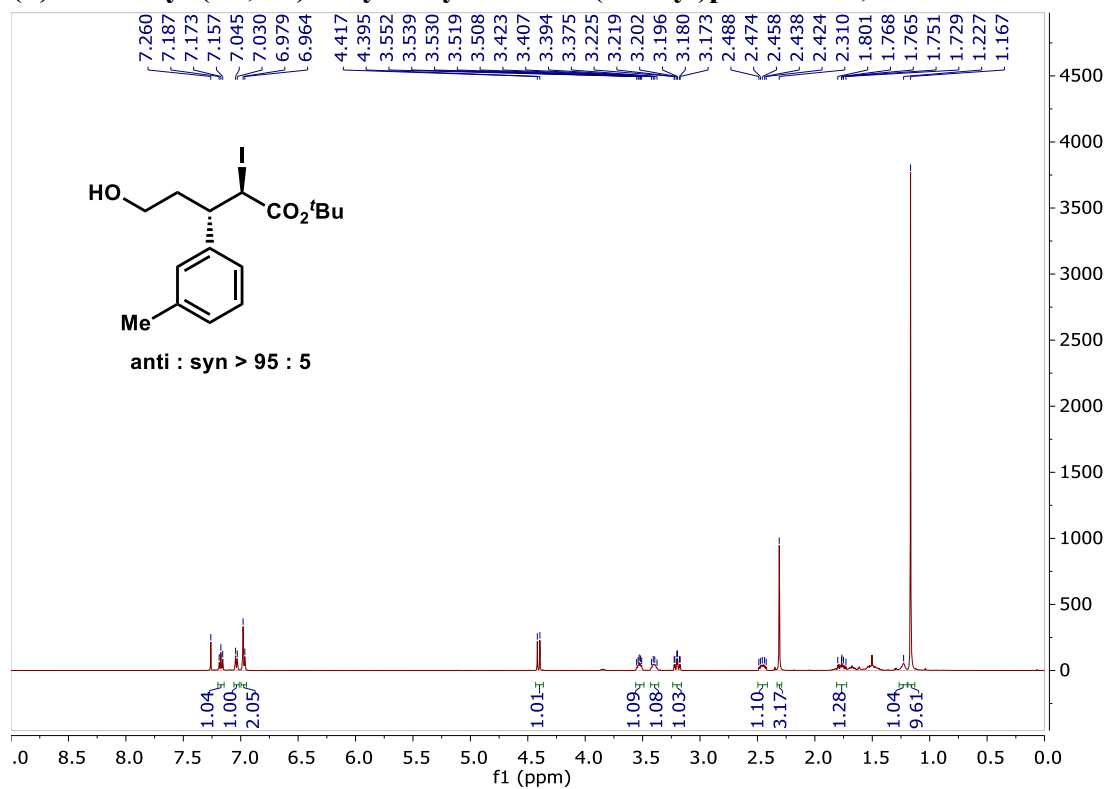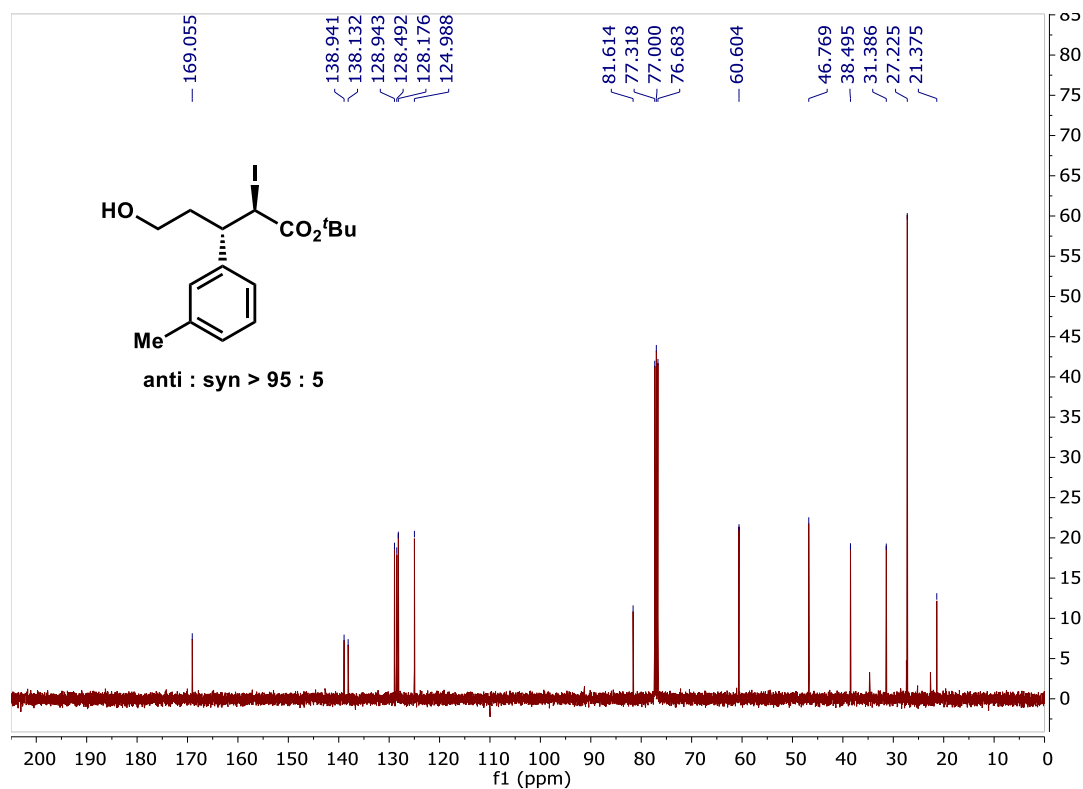

**(+)-*tert*-Butyl (2*R*, 3*S*)-3-(2-chlorophenyl)-5-hydroxy-2-iodopentanoate, 6l**

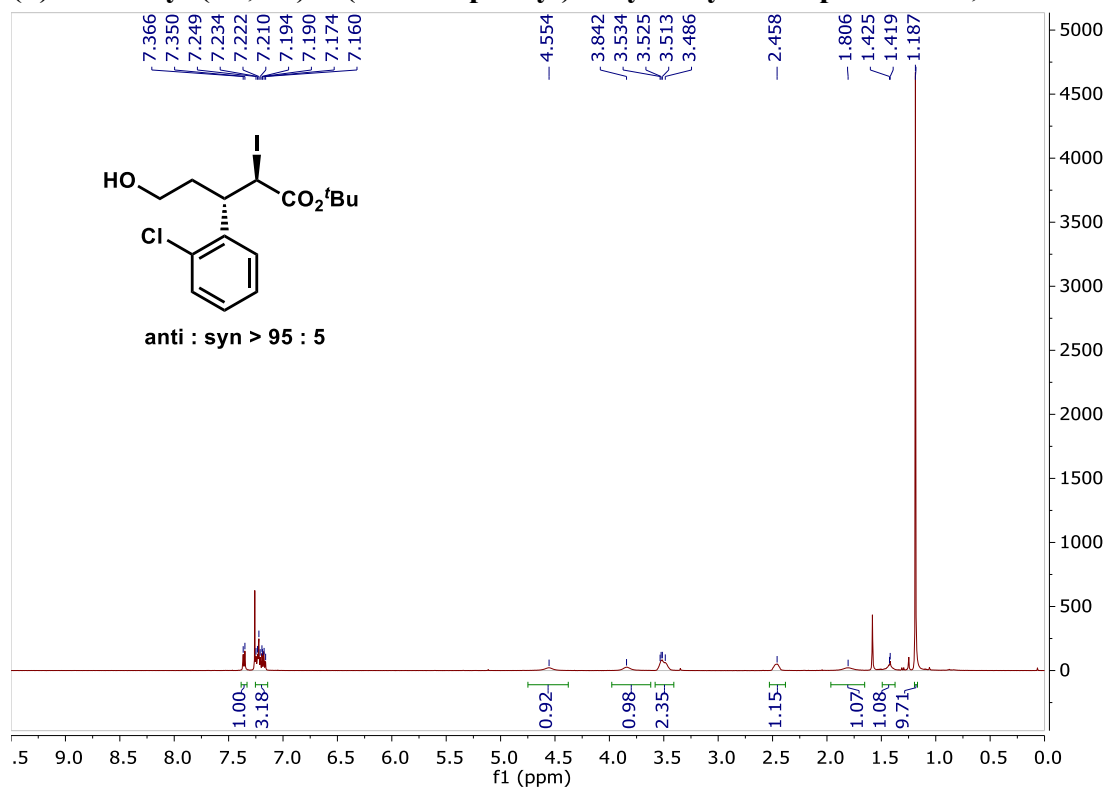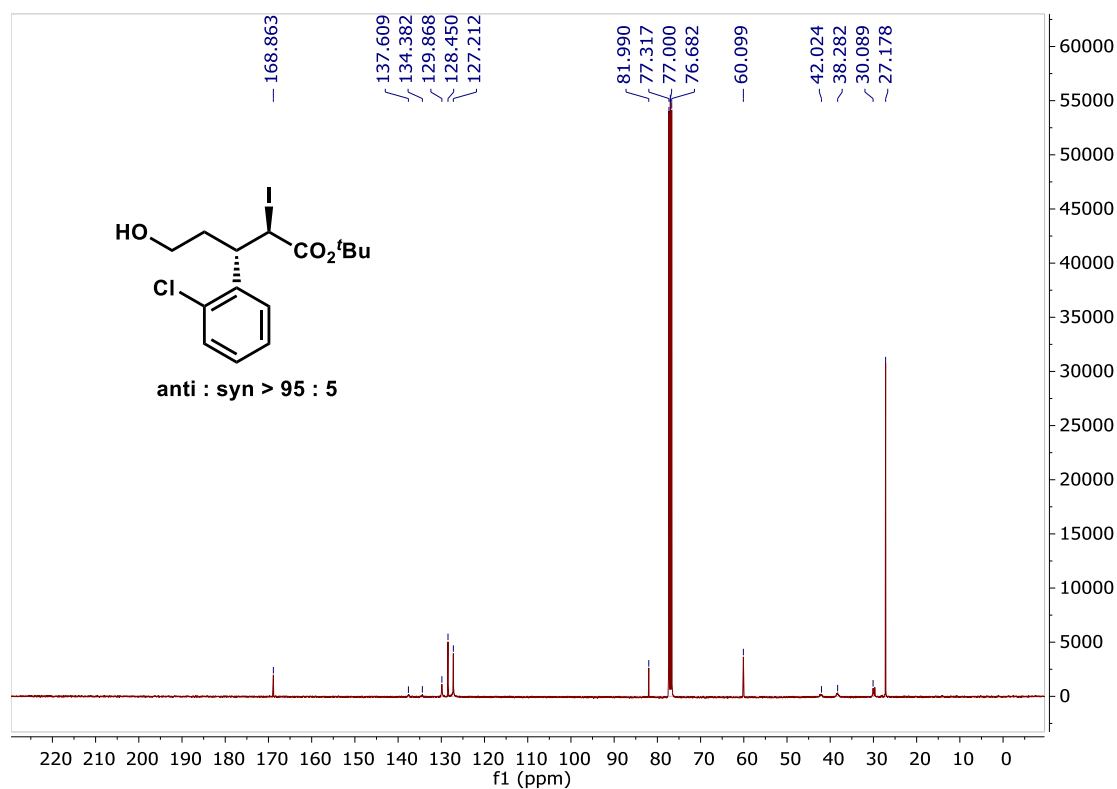

**(+)-*tert*-Butyl (2*R*, 3*S*)-3-(2-bromophenyl)-5-hydroxy-2-iodopentanoate, 6m**

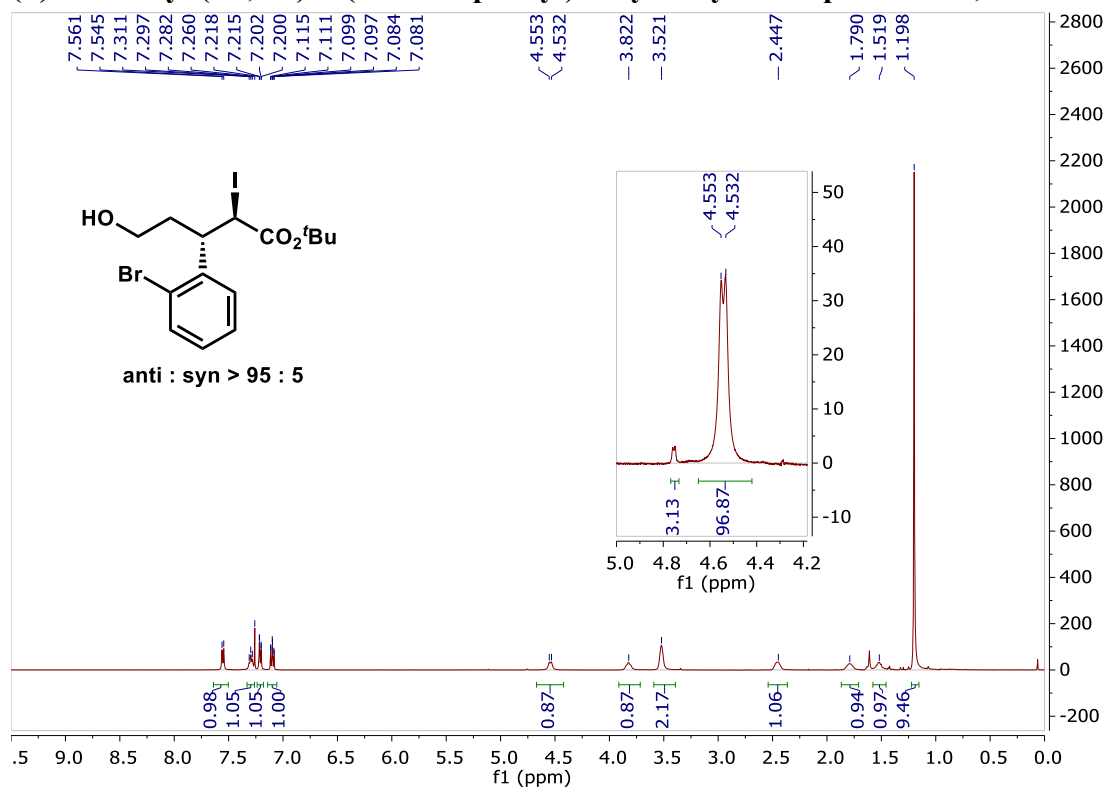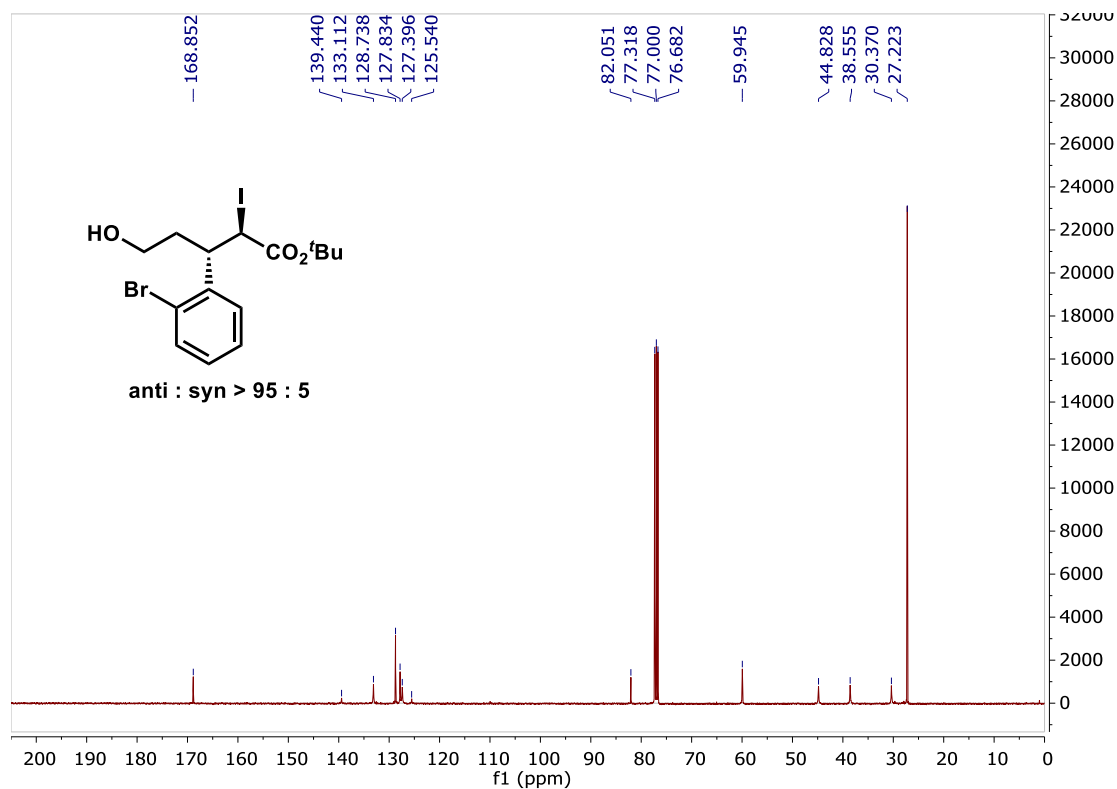

**(+)-*tert*-Butyl (2*R*, 3*R*)-3-ethyl-5-hydroxy-2-iodopentanoate, 6n**

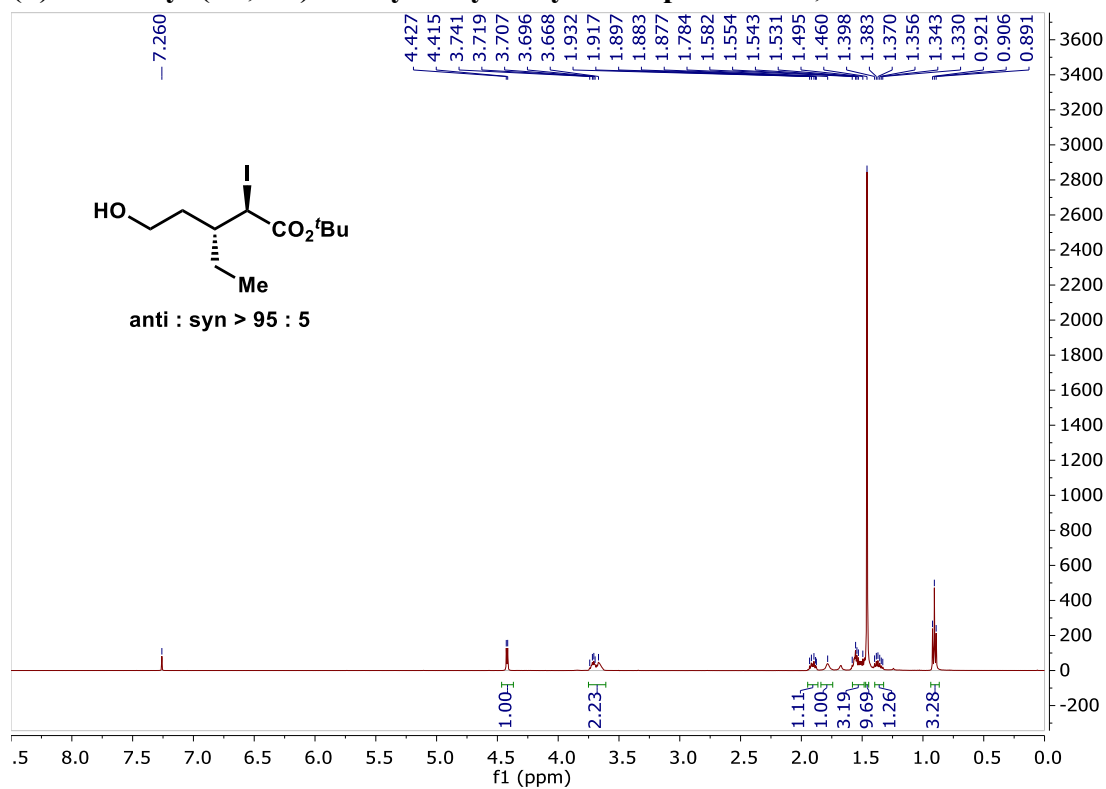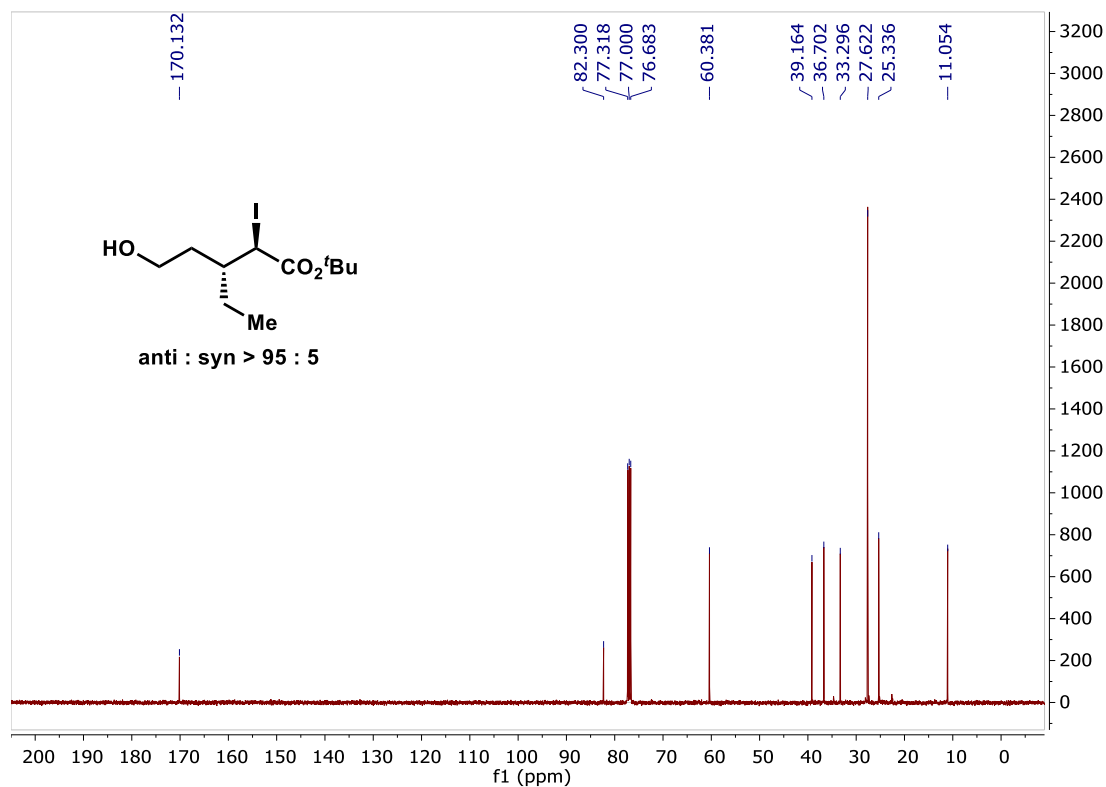

**(+)-*tert*-Butyl (2*R*, 3*R*)-3-(2-hydroxyethyl)-2-iodononanoate, 6o**

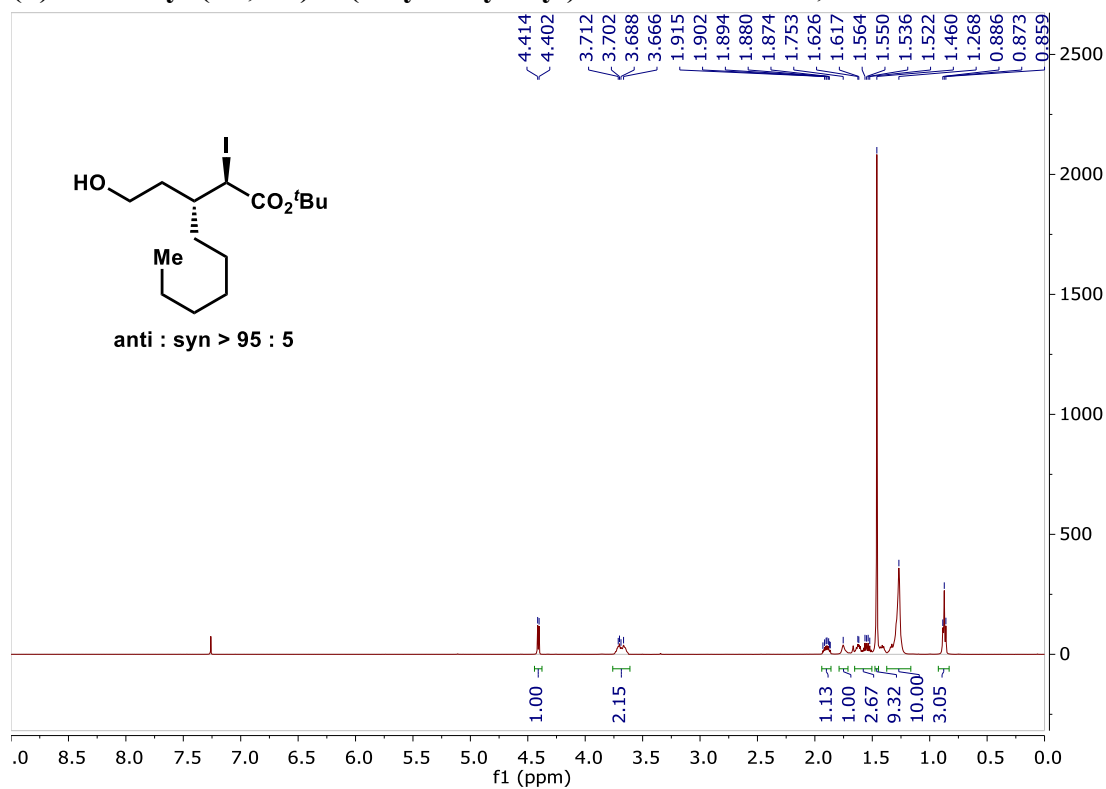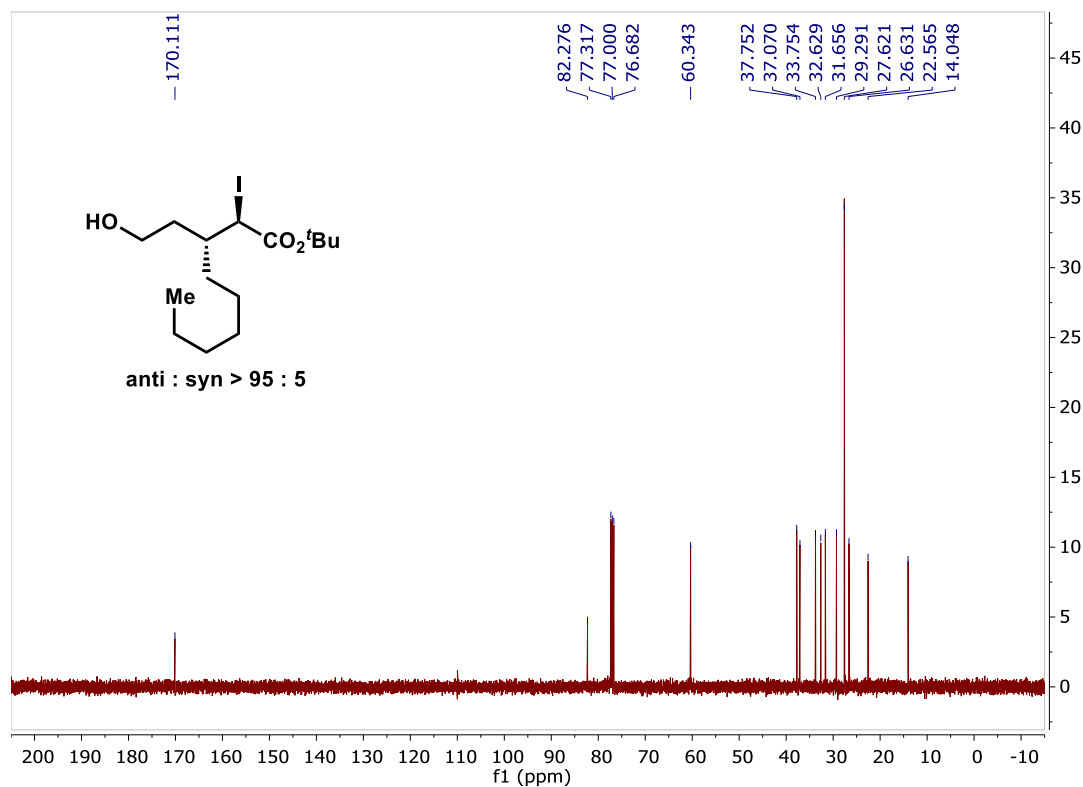

(+)-*tert*-Butyl

(2*R*,

3*S*)-3-(((*tert*-butyldimethylsilyl)oxy)methyl)-5-hydroxy-2-iodopentanoate, **6p**

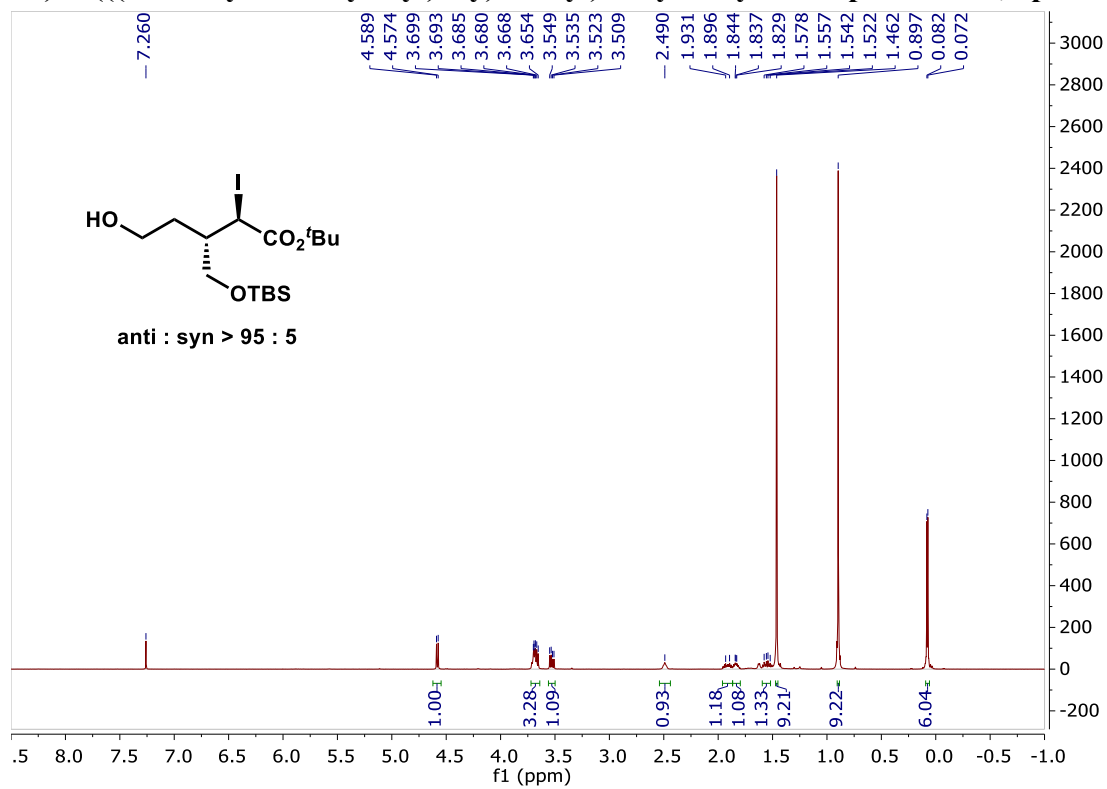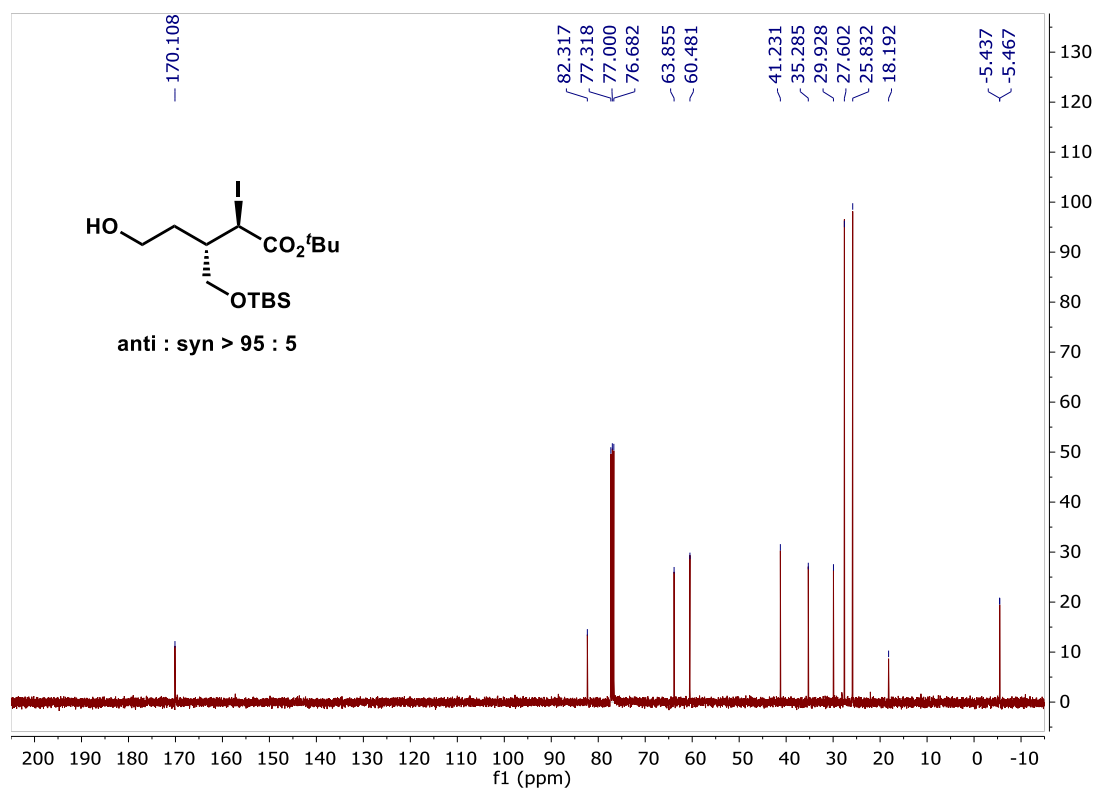

**(+)-*tert*-Butyl (*R*)-5-hydroxy-2-iodo-3,3-dimethylpentanoate, 6s**

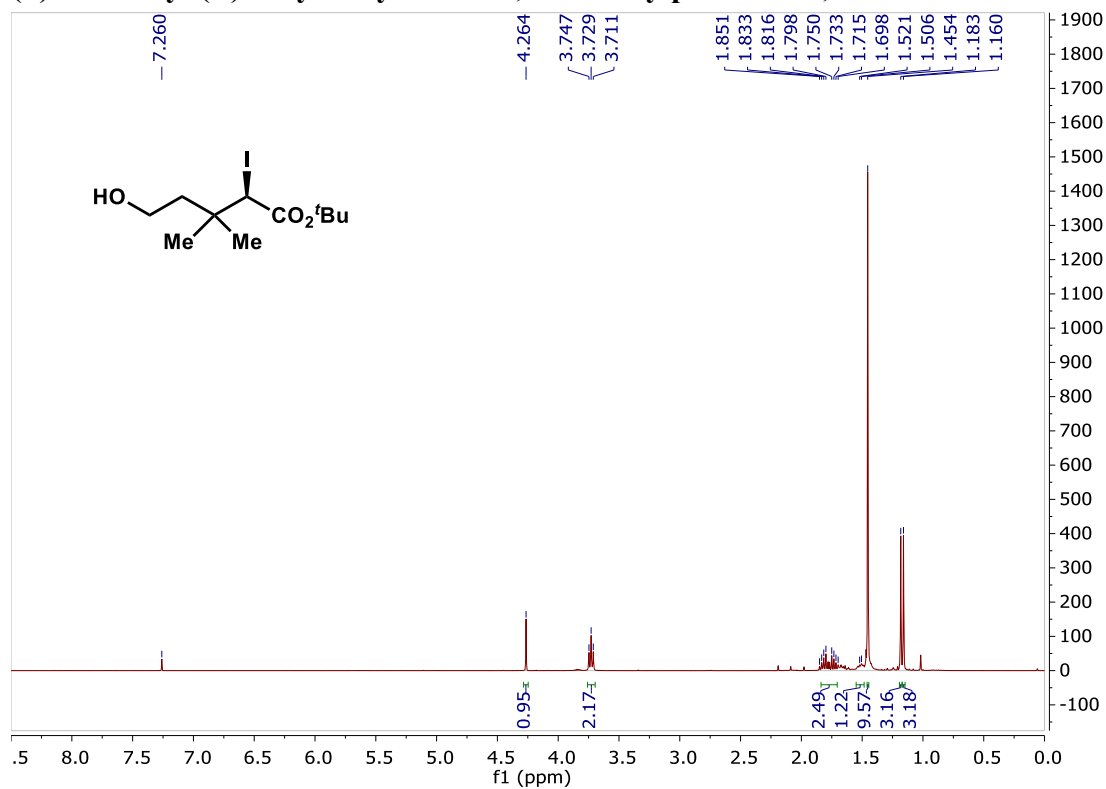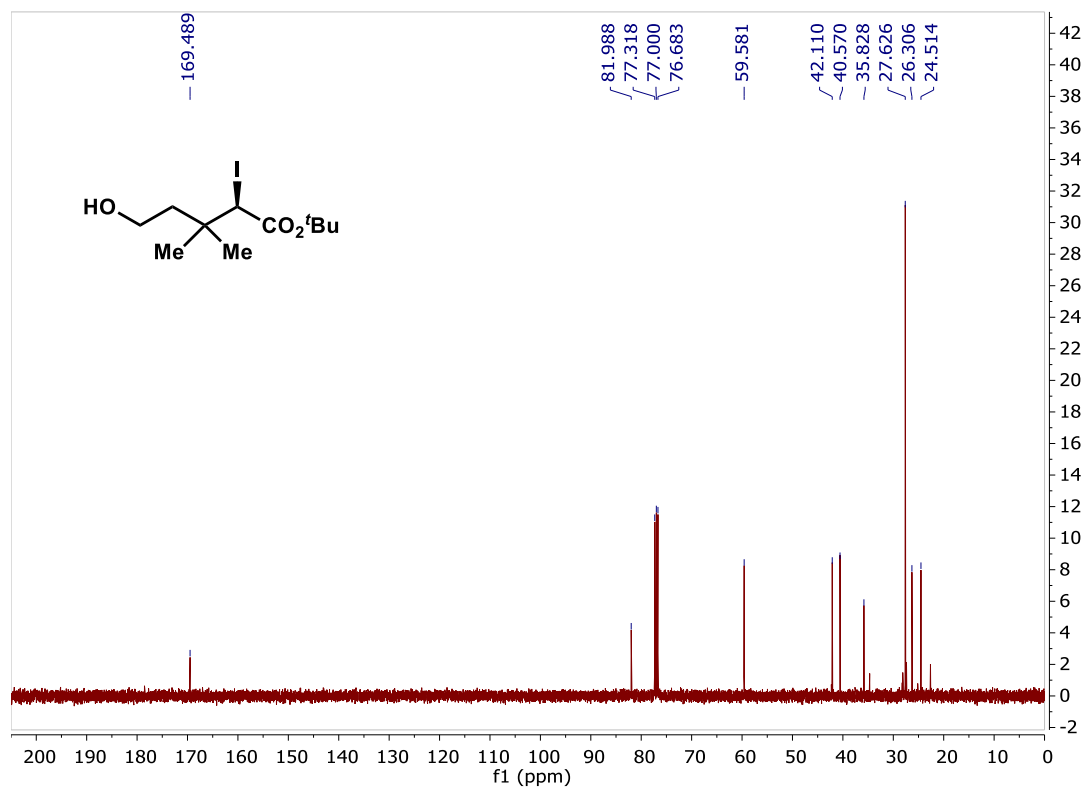

**(+)-*tert*-Butyl (*R*)-2-(1-(2-hydroxyethyl)cycloheptyl)-2-iodoacetate, 6v**

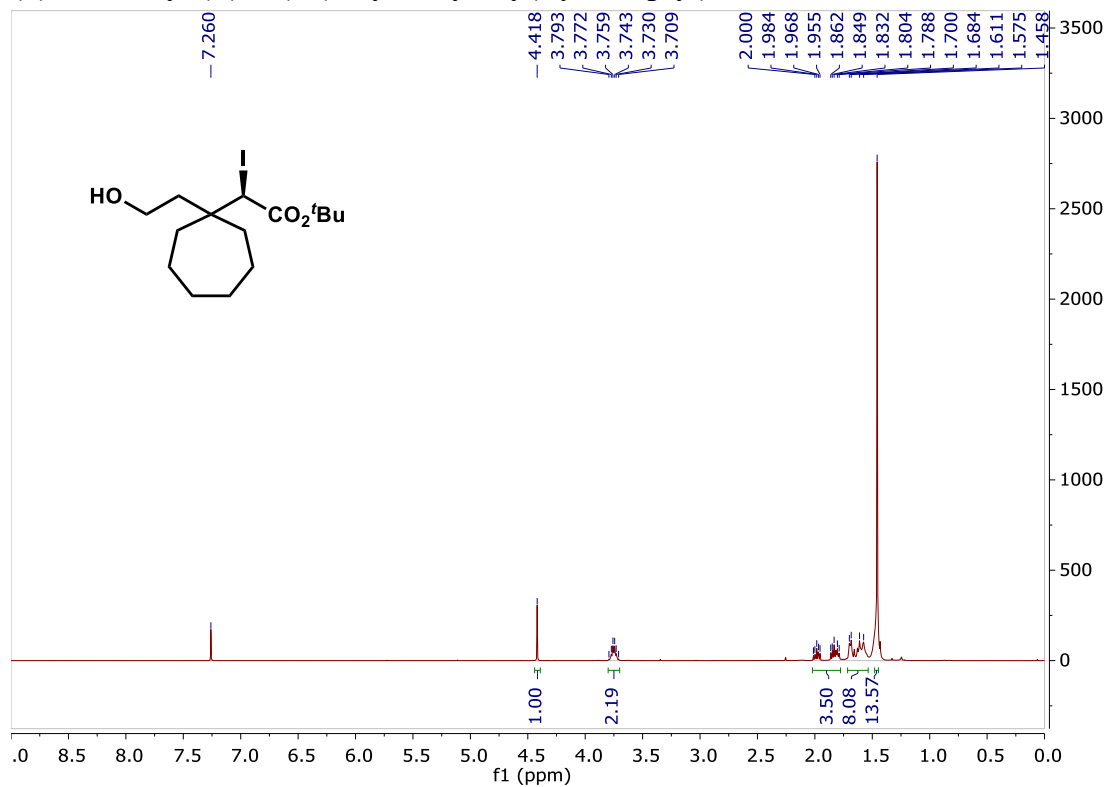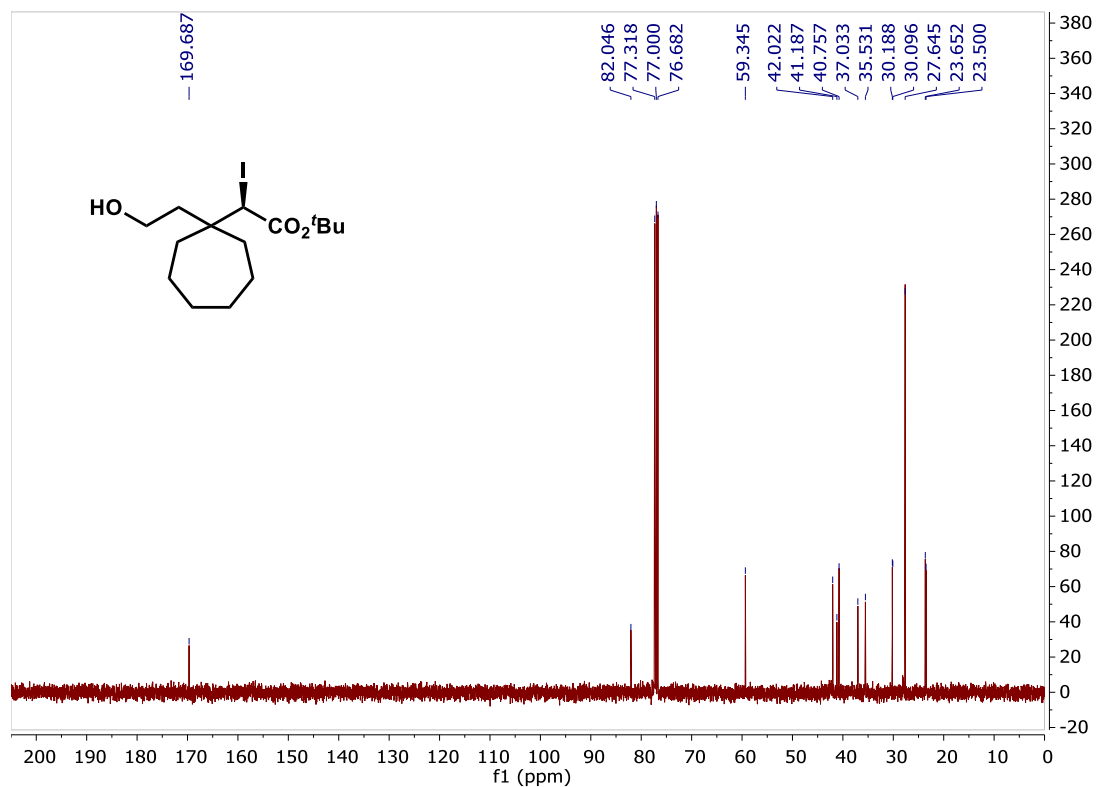



**(+)-*tert*-Butyl (2*R*)-2-((1*R*)-2-(hydroxymethyl)cyclohexyl)-2-iodoacetate, 6y**

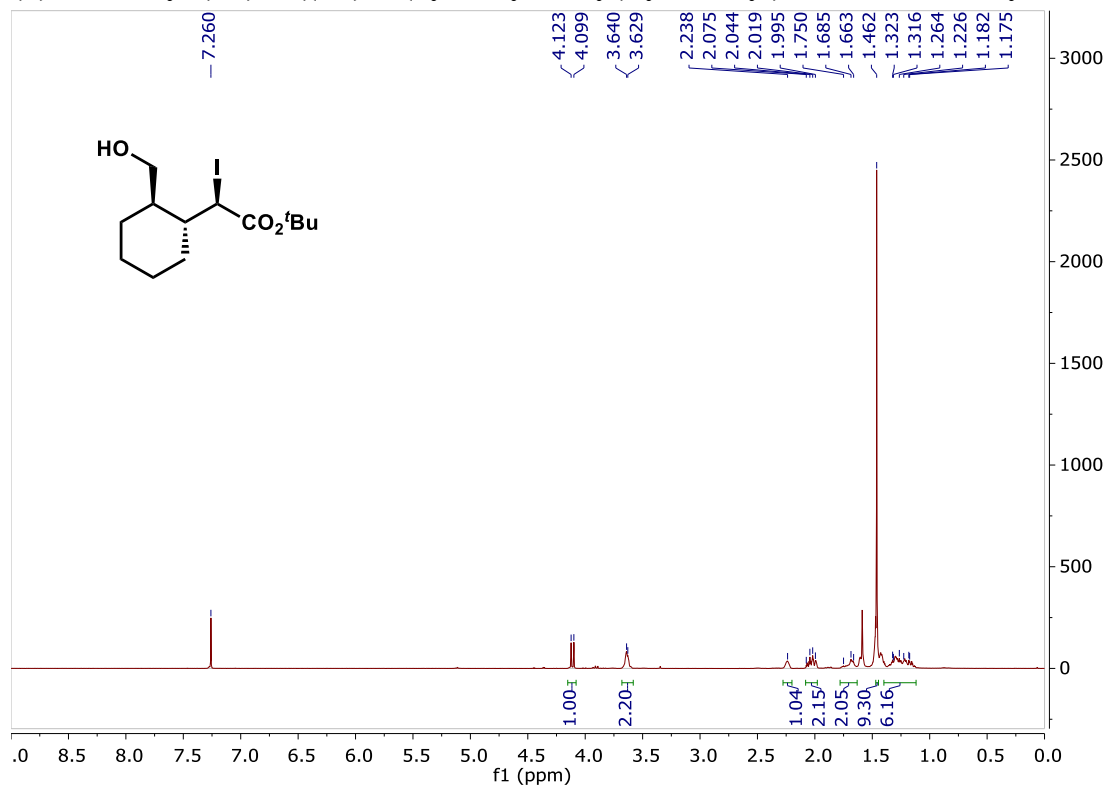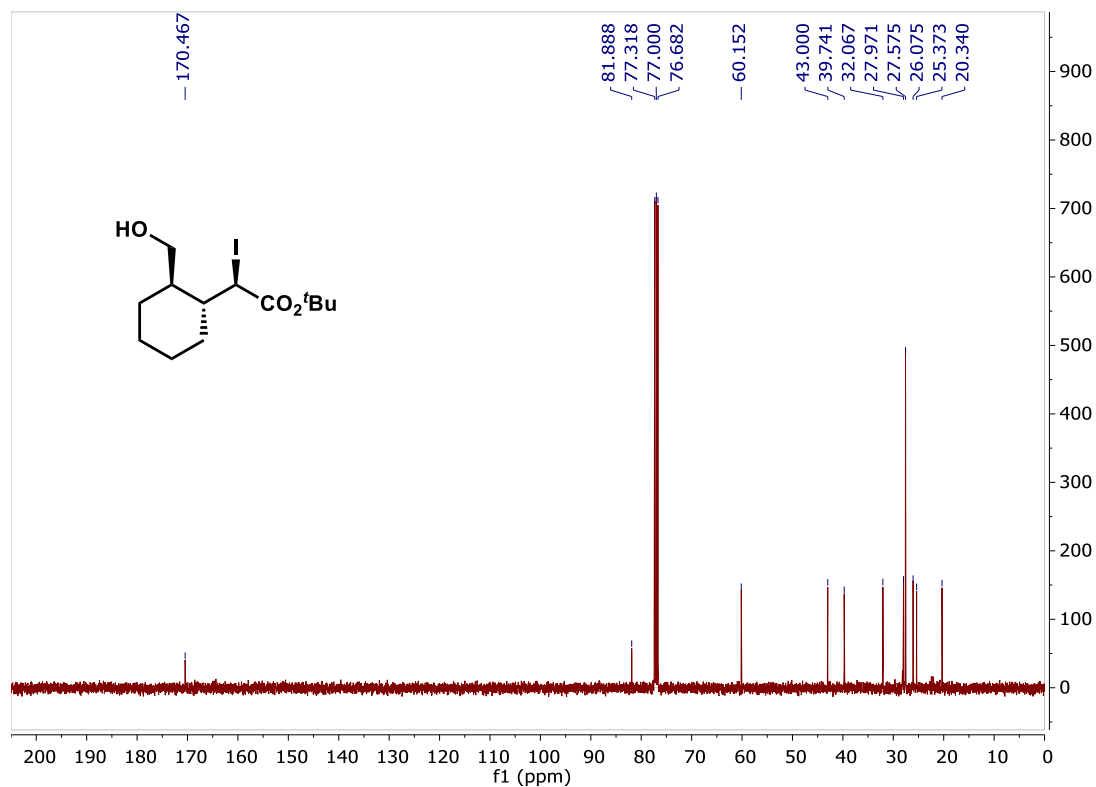

**(-)-*tert*-Butyl (2*S*, 3*S*)-3-phenyl-2-(phenylthio)pent-4-enoate, 7a**

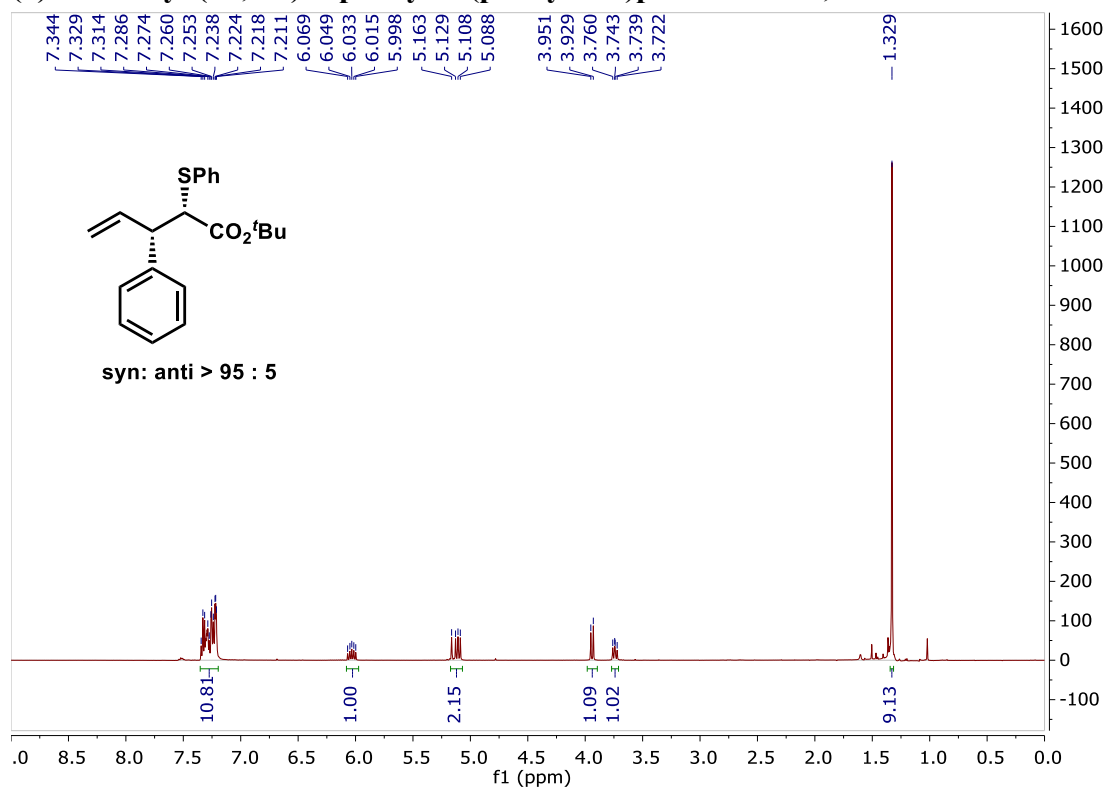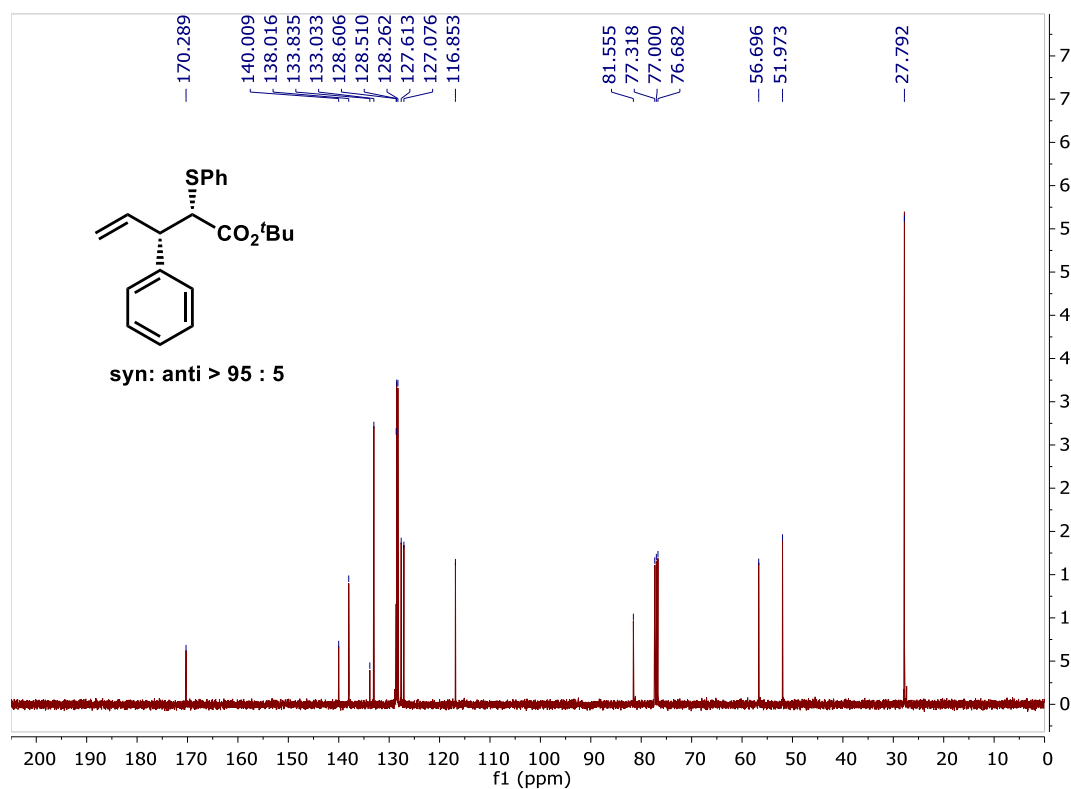

**(-)-*tert*-Butyl (2*S*, 3*S*)-2-(phenylthio)-3-((phenylthio)methyl)pent-4-enoate, 7q**

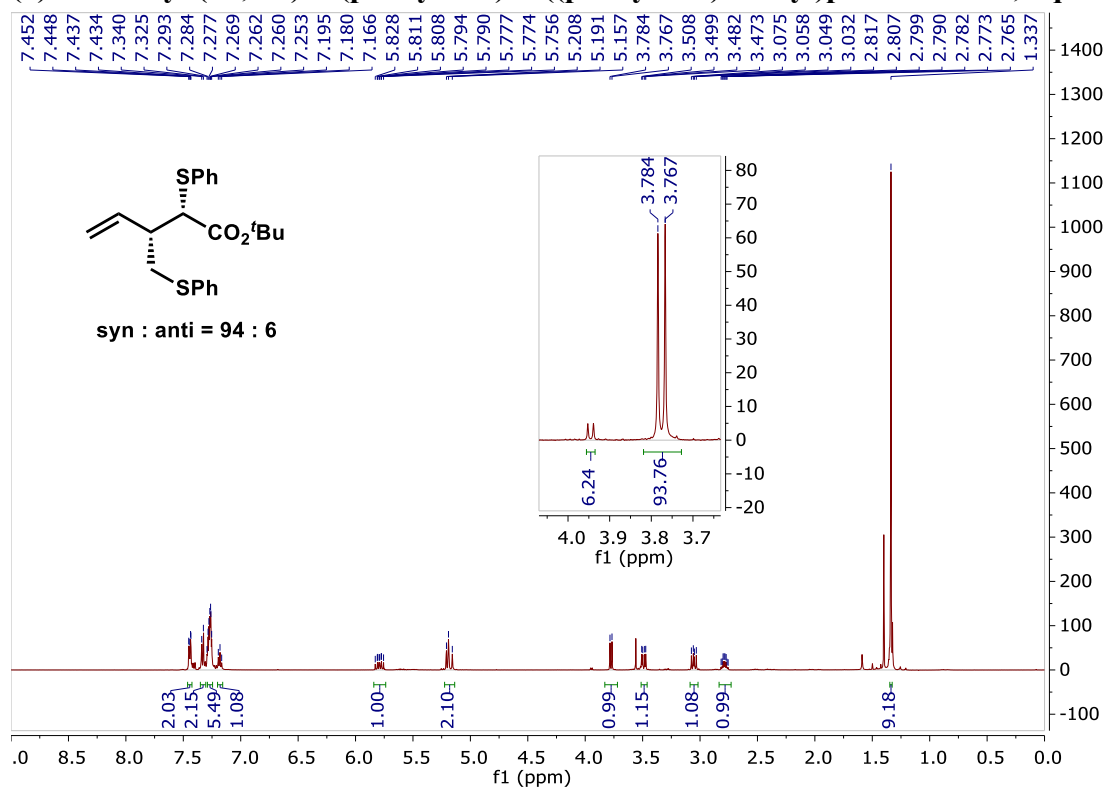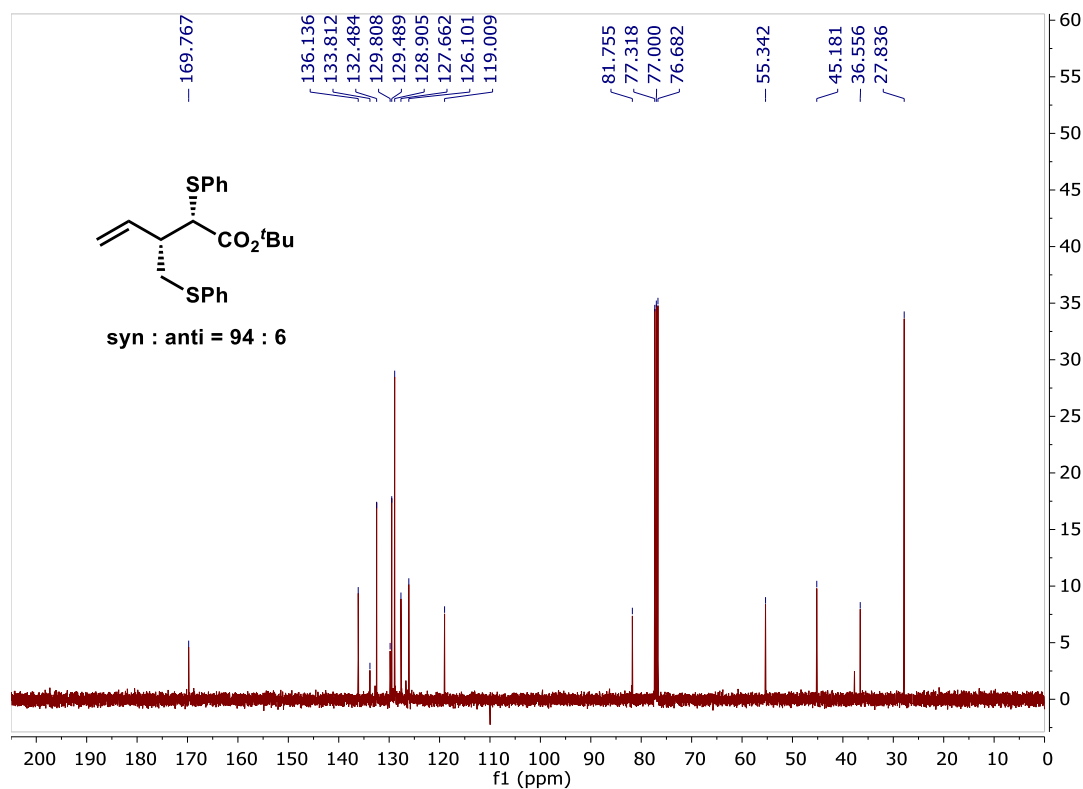

**(-)-*tert*-Butyl (*S*)-2-azido-2-(1-vinylcyclopentyl)acetate, 8t**

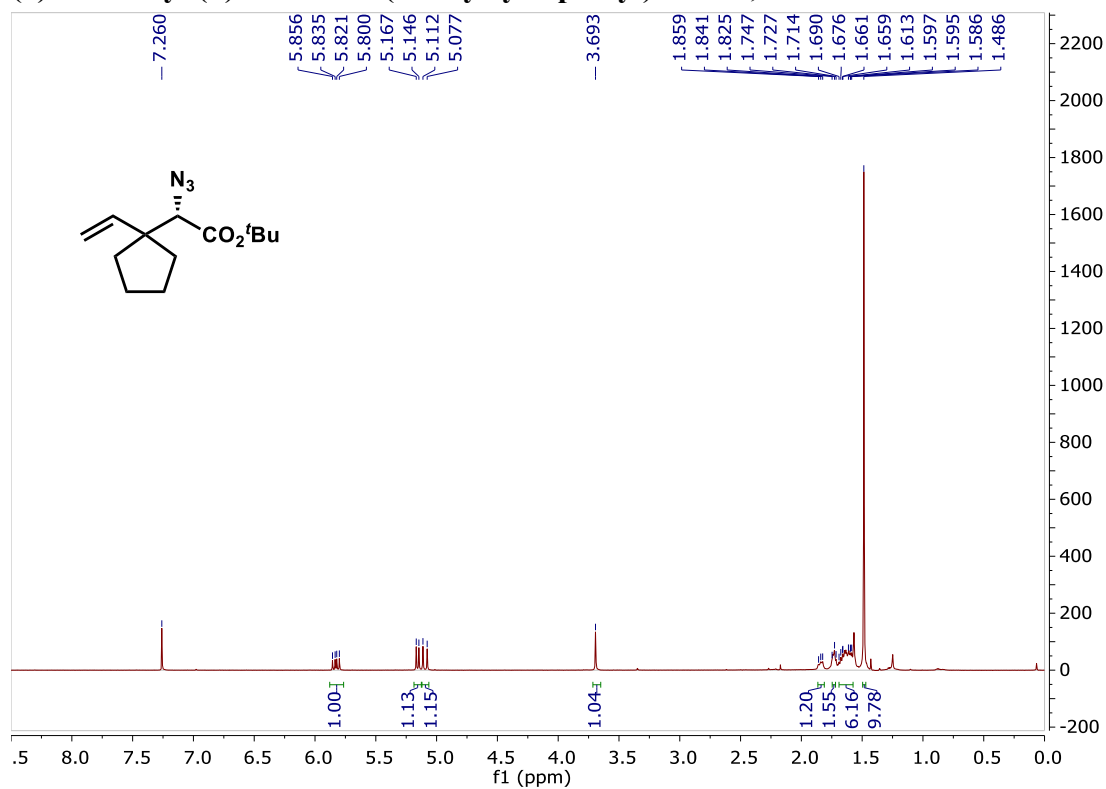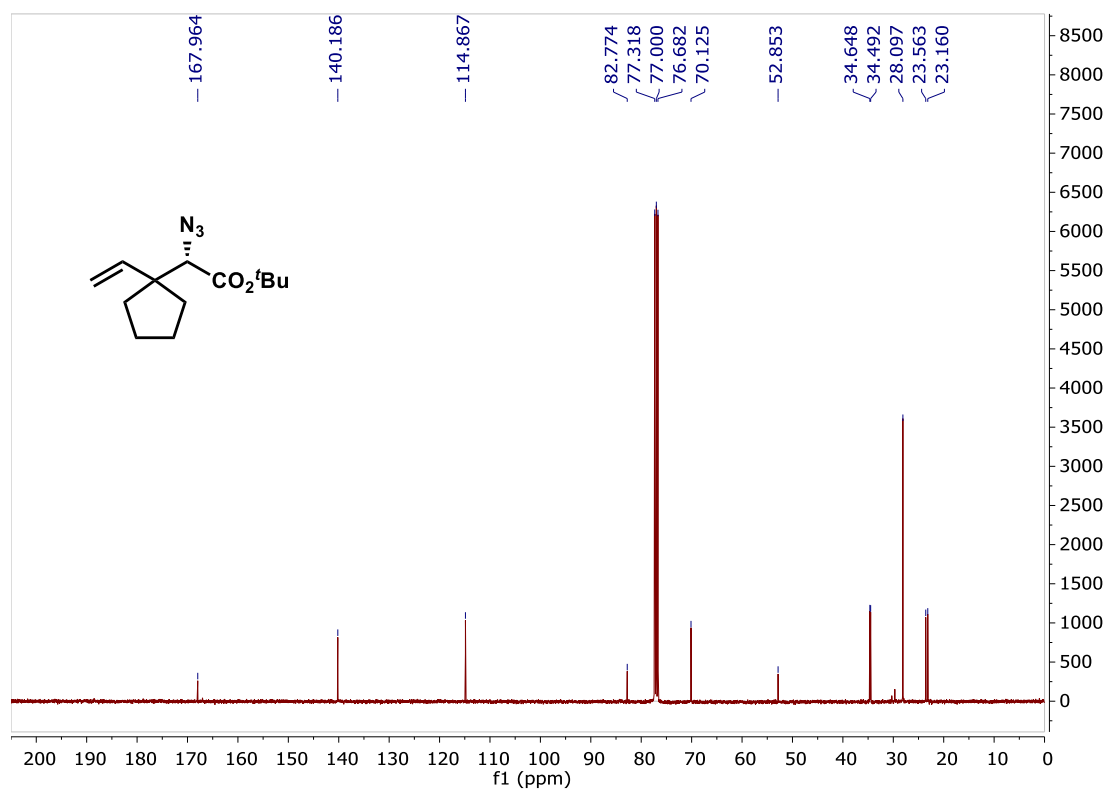

**(-)-tert-Butyl (S)-2-azido-2-(1-vinylcyclohexyl)acetate, 8u**

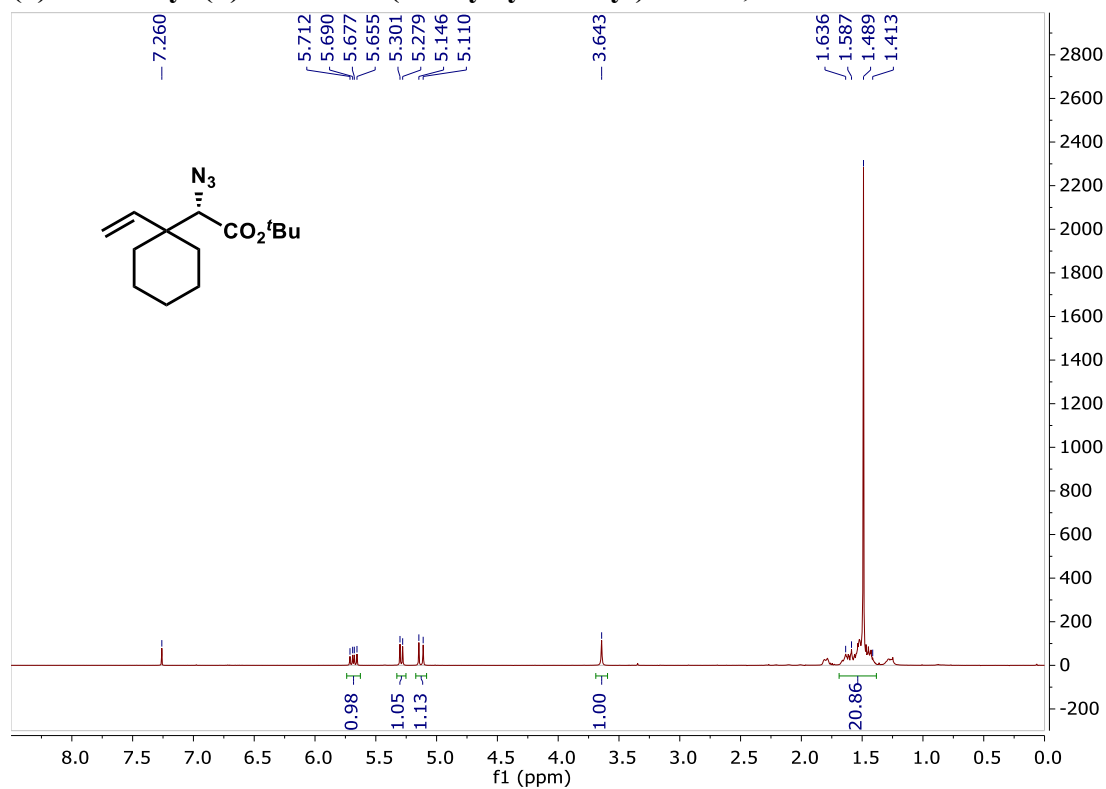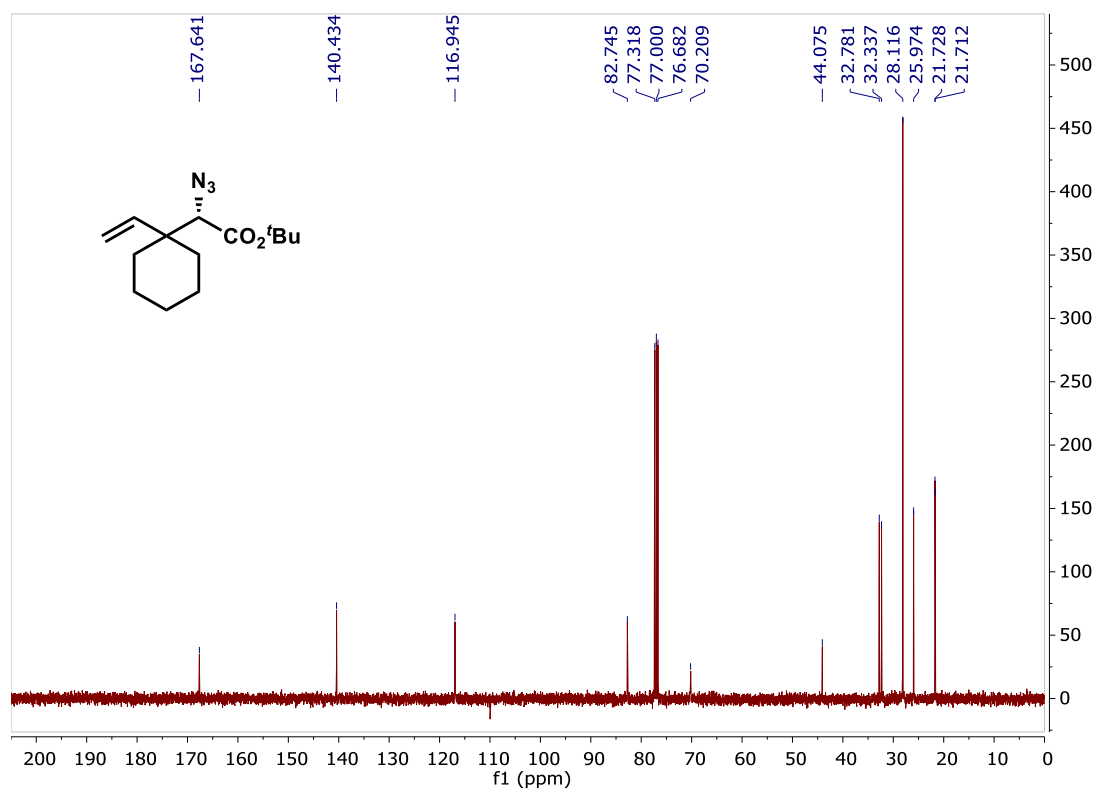

**(-)-*tert*-Butyl (*S*)-2-azido-2-(1-vinylcycloheptyl)acetate, **8v****

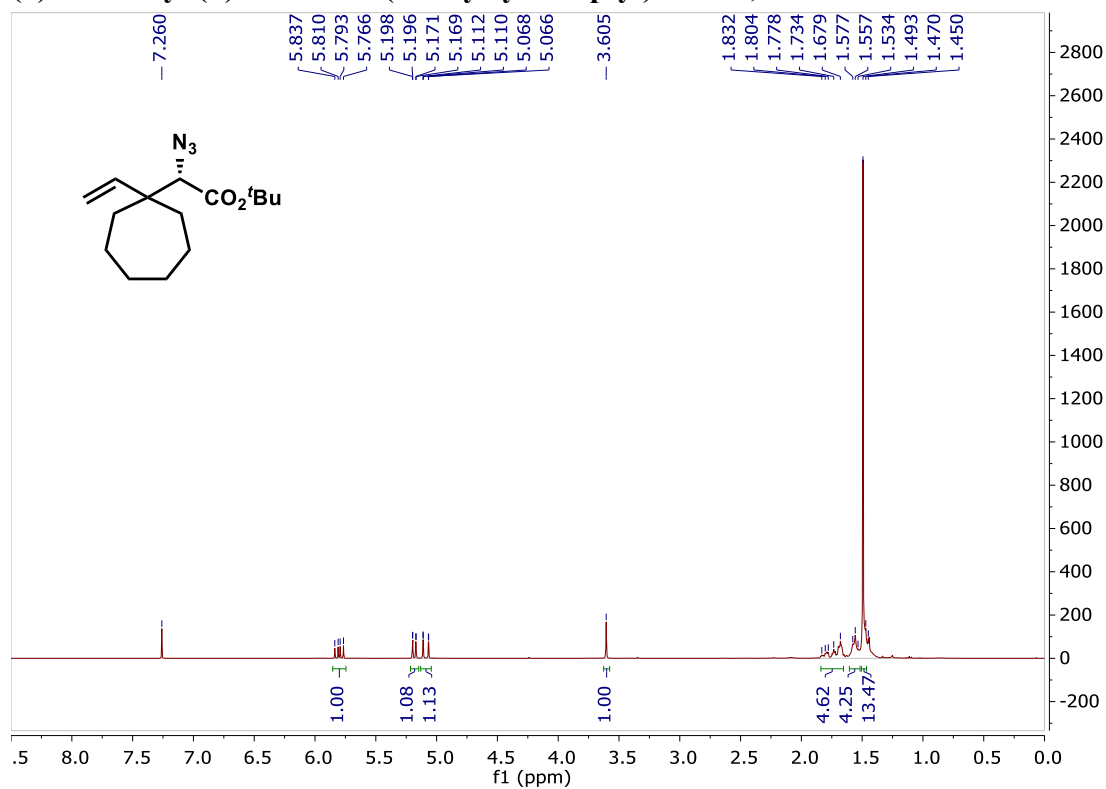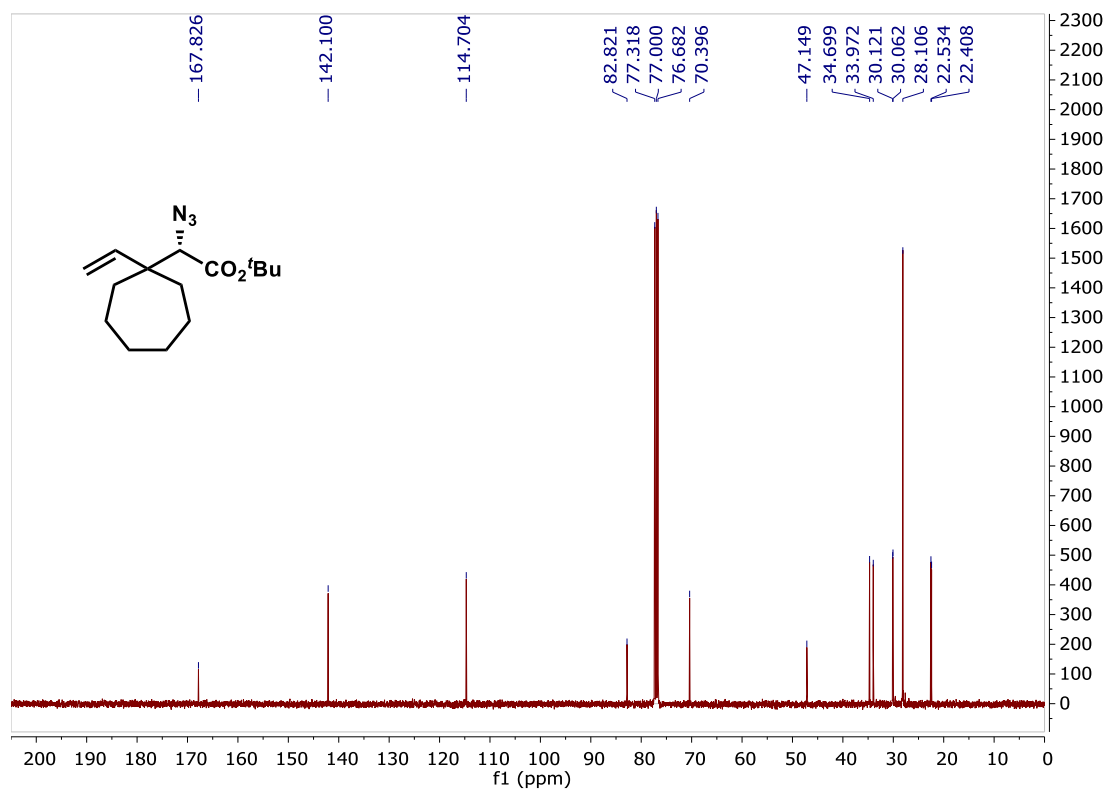

**(+)-tert-Butyl (2R, 3R)-2-(dicyanomethyl)-3-phenylpent-4-enoate, 9a**

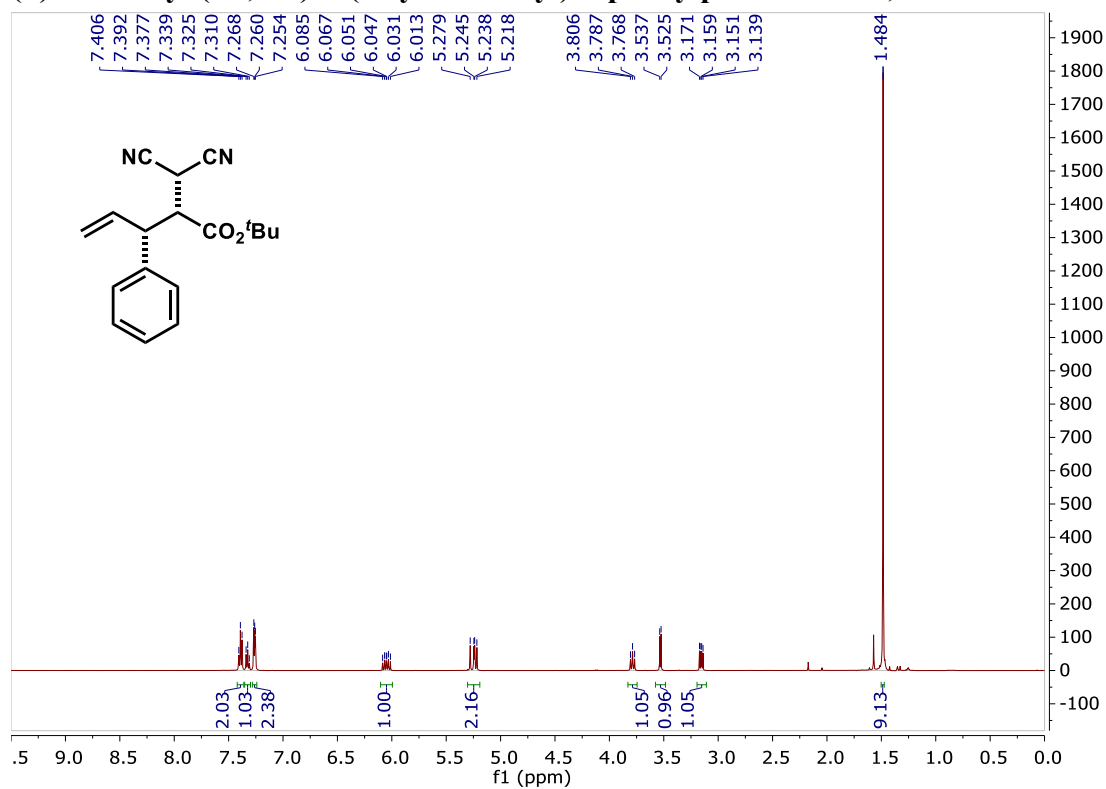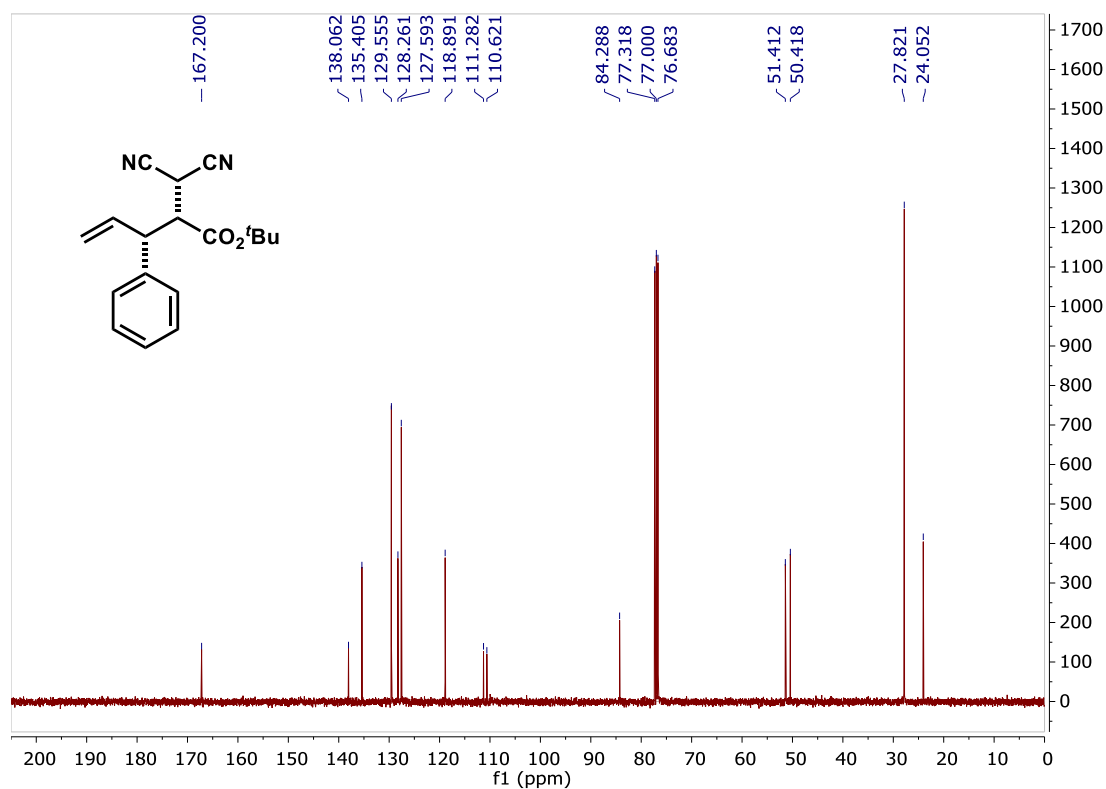

**(+)-*tert*-Butyl (*S*)-3-phenylpent-4-enoate, 10a**

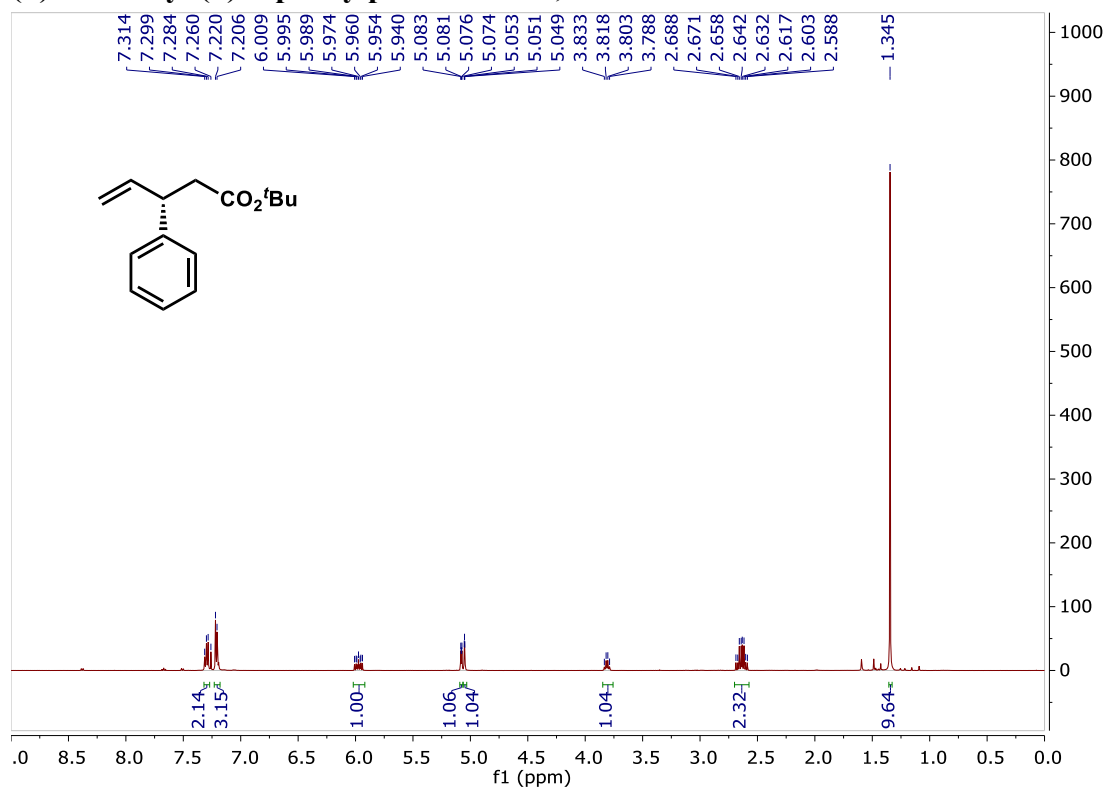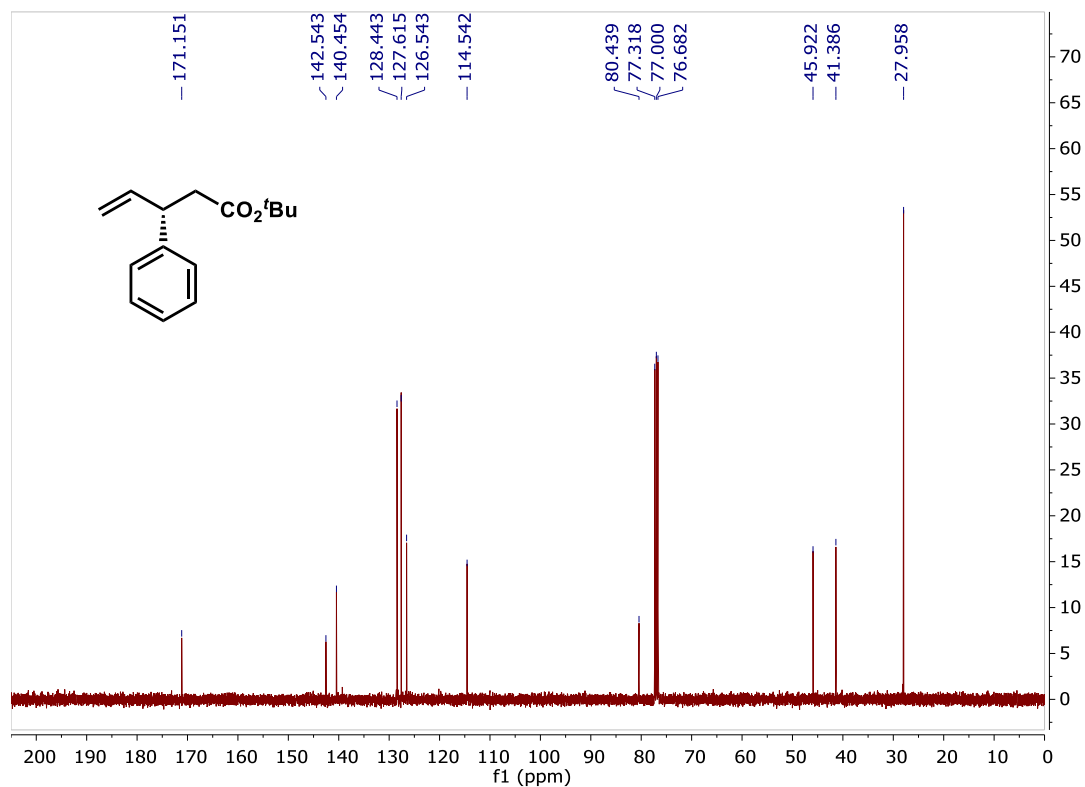



**(+)-*tert*-Butyl (*S*)-2-(4-phenyl-1*H*-1,2,3-triazol-1-yl)-2-(1-vinylcyclopentyl)acetate, S11t**

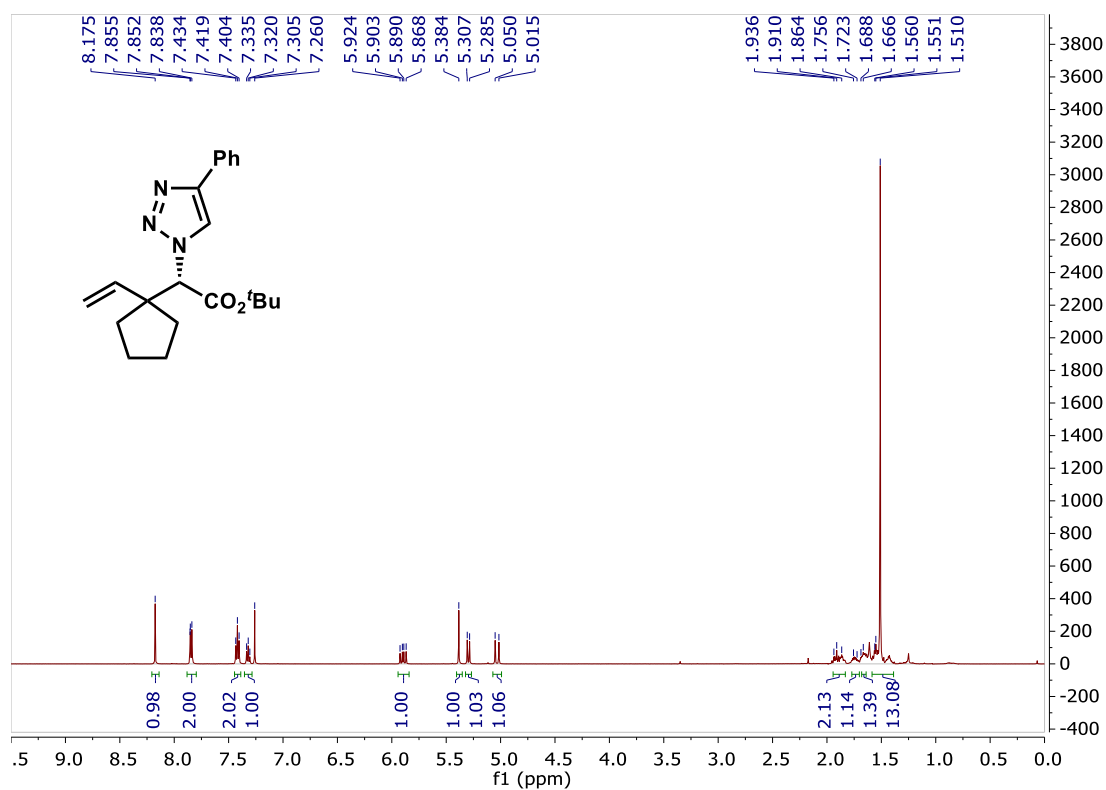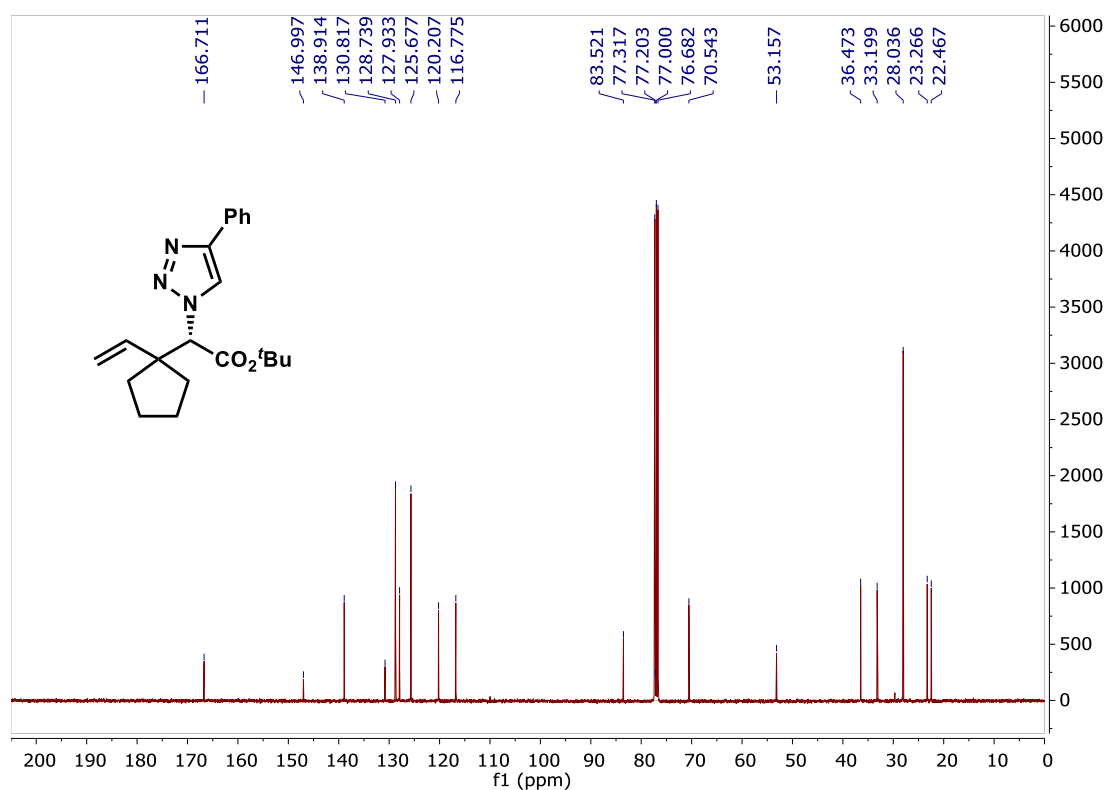

**(+)-*tert*-Butyl (S)-2-(4-phenyl-1*H*-1,2,3-triazol-1-yl)-2-(1-vinylcyclohexyl)acetate, S11u**

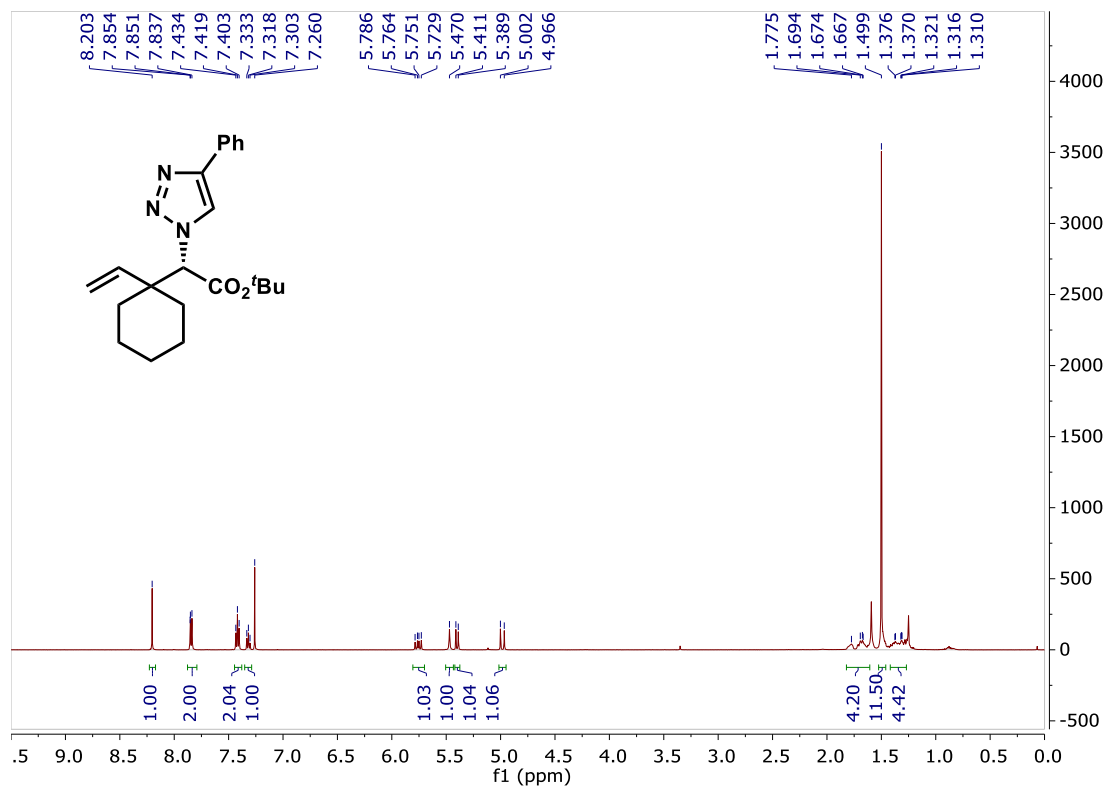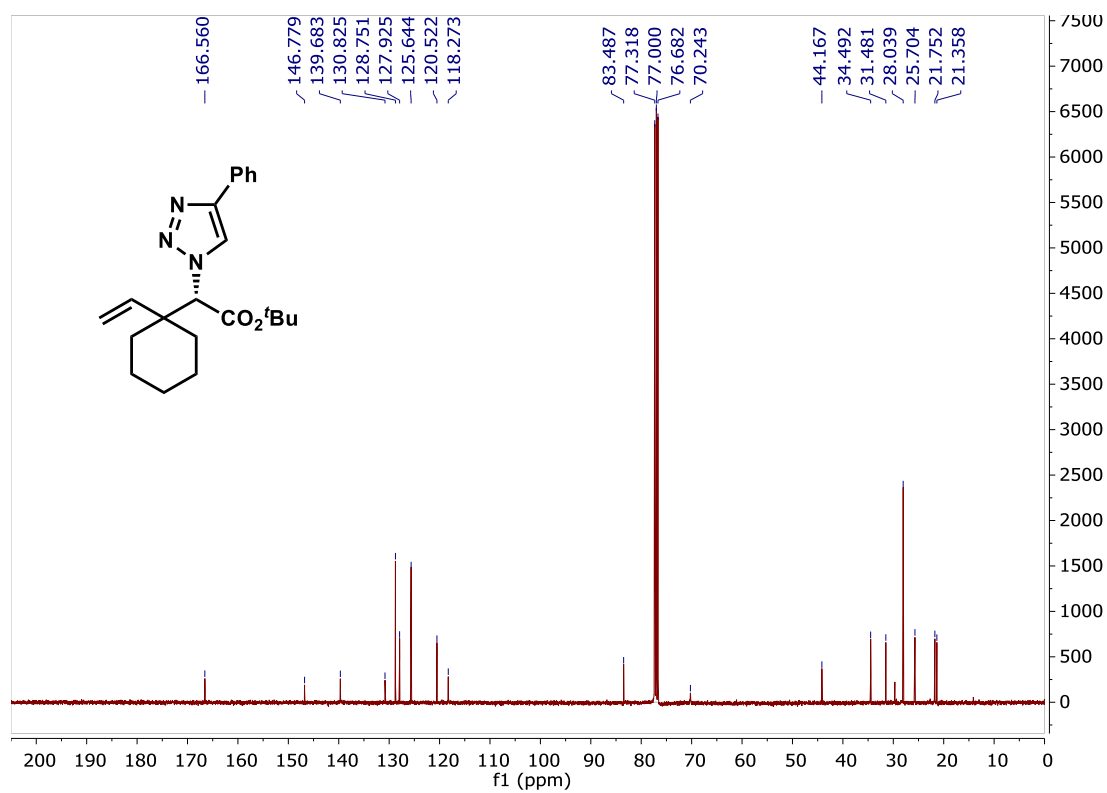

**(+)-*tert*-Butyl (S)-2-(4-phenyl-1*H*-1,2,3-triazol-1-yl)-2-(1-vinylcycloheptyl)acetate, S11v**

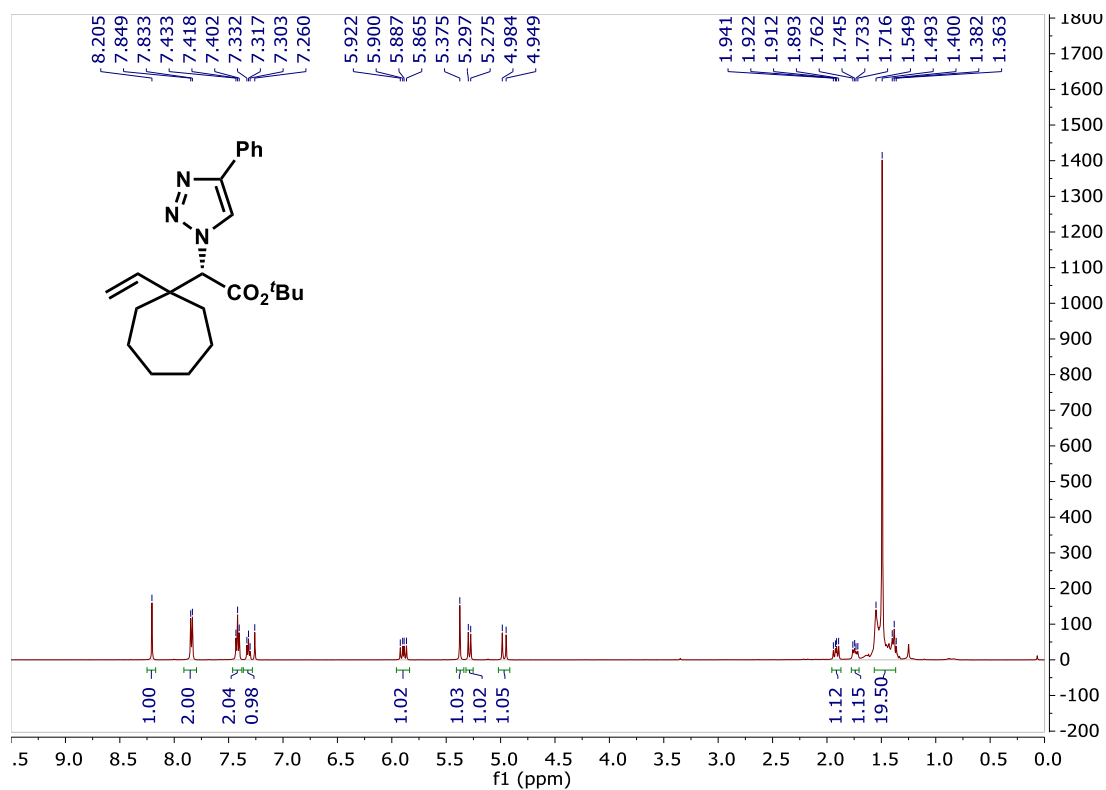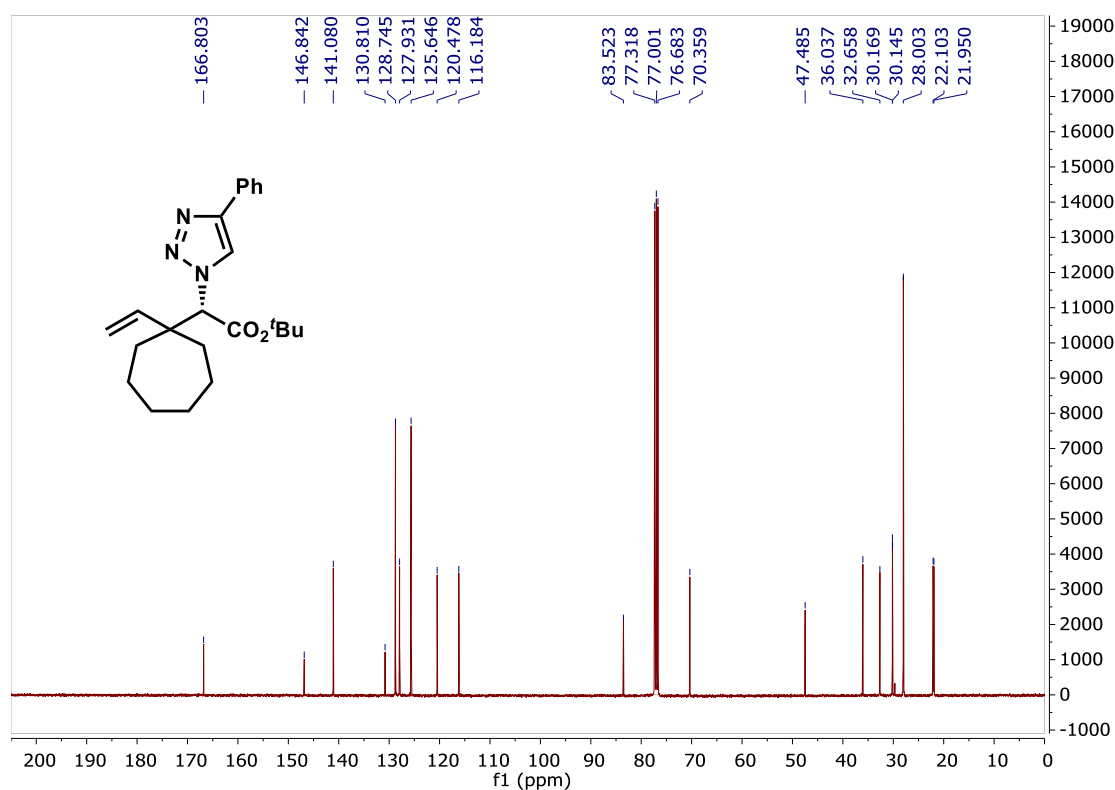

## 12. HPLC Charts

### (+)-*tert*-Butyl (2*R*, 3*S*)-2-iodo-3-phenylpent-4-enoate, 5a

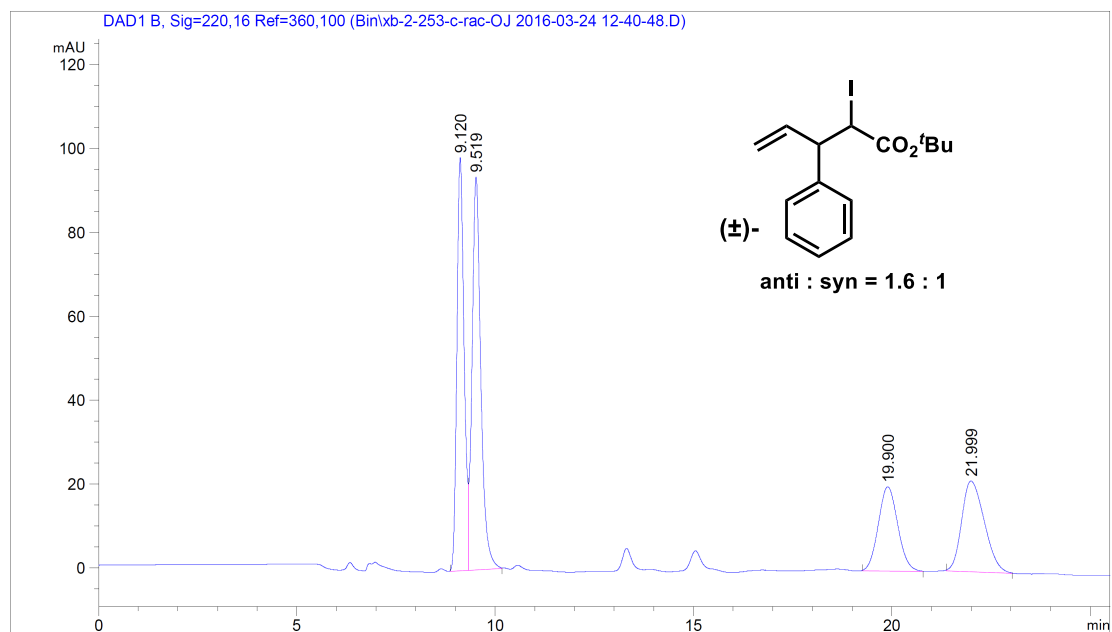

| Peak # | RetTime [min] | Type | Width [min] | Area [mAU*s] | Area %  | Name |
|--------|---------------|------|-------------|--------------|---------|------|
| 1      | 9.120         | BV   | 0.1920      | 1241.80640   | 29.4126 | ?    |
| 2      | 9.519         | VB   | 0.2289      | 1438.31628   | 34.0670 | ?    |
| 3      | 19.900        | BB   | 0.5205      | 684.29065    | 16.2076 | ?    |
| 4      | 21.999        | BB   | 0.6163      | 857.61230    | 20.3128 | ?    |

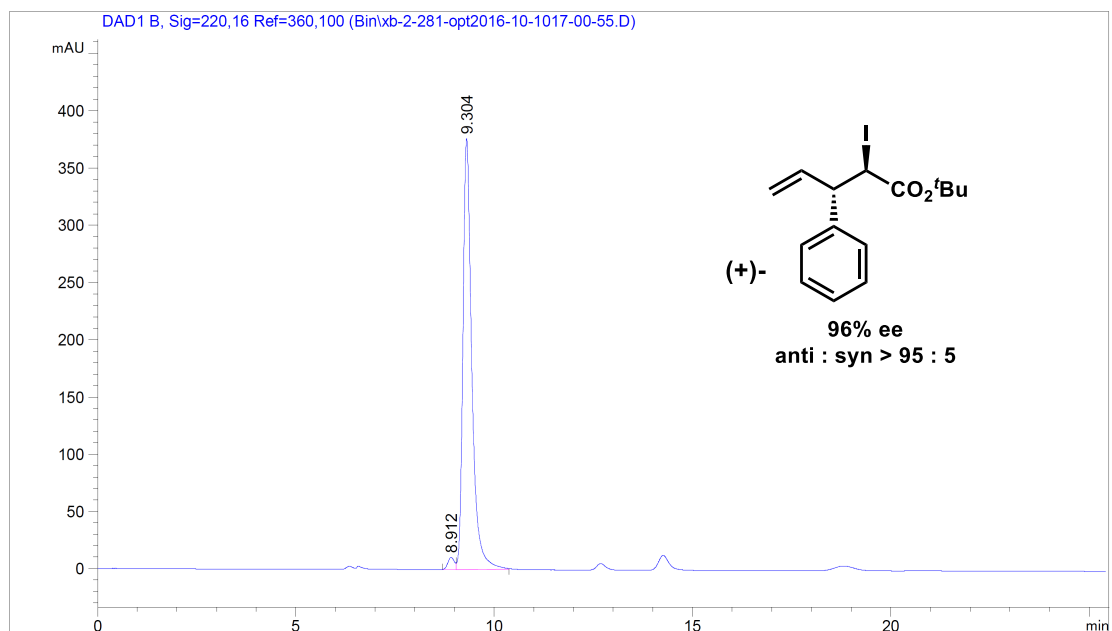

| Peak # | RetTime [min] | Type | Width [min] | Area [mAU*s] | Area %  | Name |
|--------|---------------|------|-------------|--------------|---------|------|
| 1      | 8.912         | BV   | 0.1746      | 118.39743    | 1.9901  | ?    |
| 2      | 9.304         | VB   | 0.2317      | 5830.78418   | 98.0099 | ?    |

### (+)-*tert*-Butyl (2*R*, 3*S*)-3-([1,1'-biphenyl]-4-yl)-2-iodopent-4-enoate, 5b

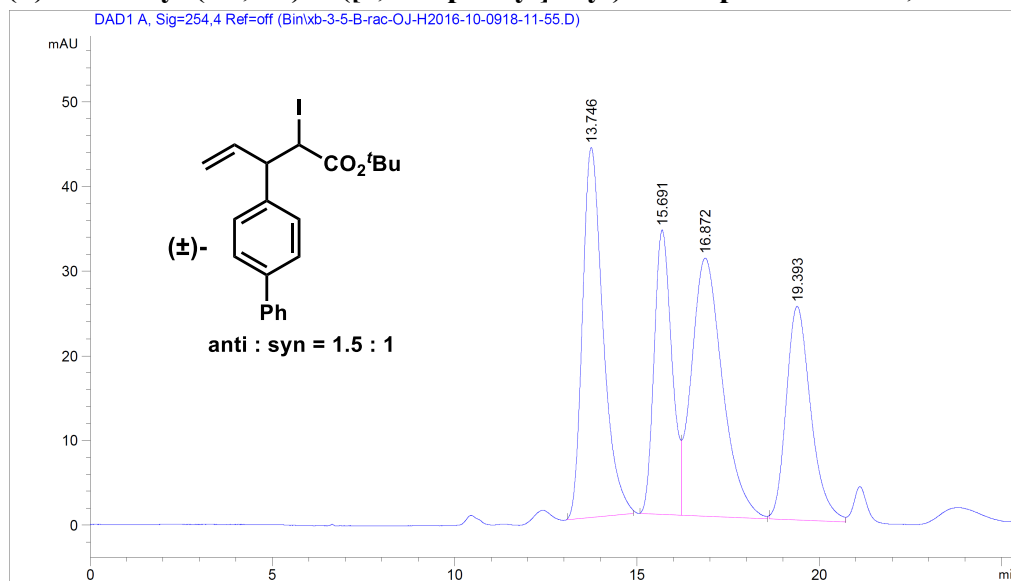

| Peak # | RetTime [min] | Type | Width [min] | Area [mAU*s] | Area %  | Name |
|--------|---------------|------|-------------|--------------|---------|------|
| 1      | 13.746        | BB   | 0.5793      | 1713.08752   | 29.3263 | ?    |
| 2      | 15.691        | BV   | 0.5155      | 1135.77490   | 19.4433 | ?    |
| 3      | 16.872        | VB   | 0.7725      | 1805.15479   | 30.9024 | ?    |
| 4      | 19.393        | BV   | 0.6823      | 1187.45190   | 20.3280 | ?    |

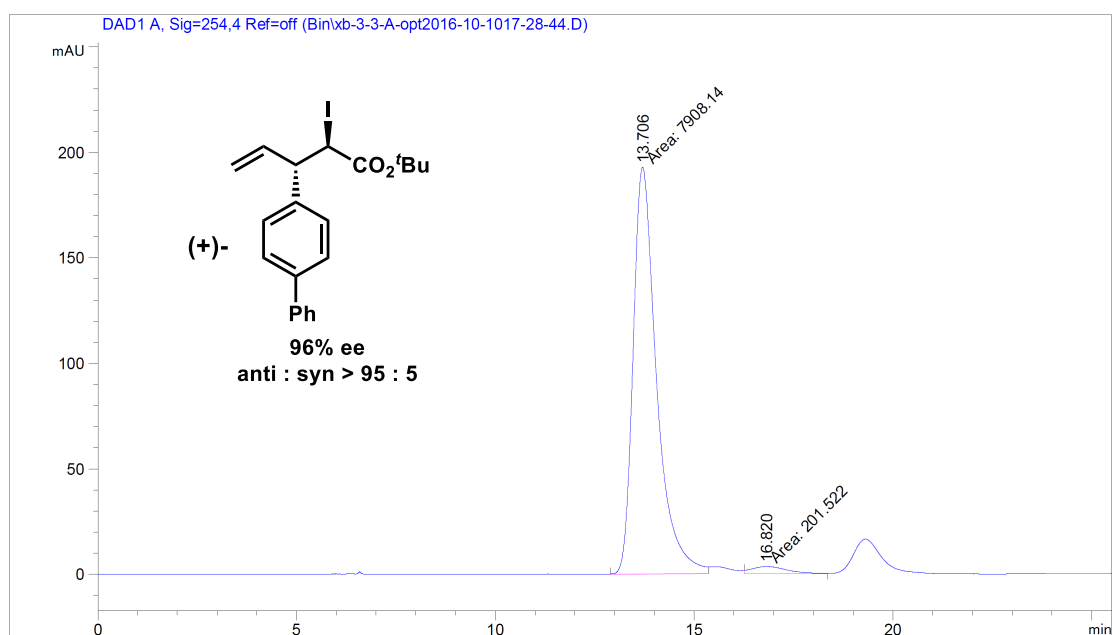

| Peak # | RetTime [min] | Type | Width [min] | Area [mAU*s] | Area %  | Name |
|--------|---------------|------|-------------|--------------|---------|------|
| 1      | 13.706        | MM   | 0.6837      | 7908.13623   | 97.5150 | ?    |
| 2      | 16.820        | MM   | 1.0066      | 201.52228    | 2.4850  | ?    |

**(+)-*tert*-Butyl (2*R*, 3*S*)-5-hydroxy-2-iodo-3-(naphthalen-1-yl)pentanoate, 6c**

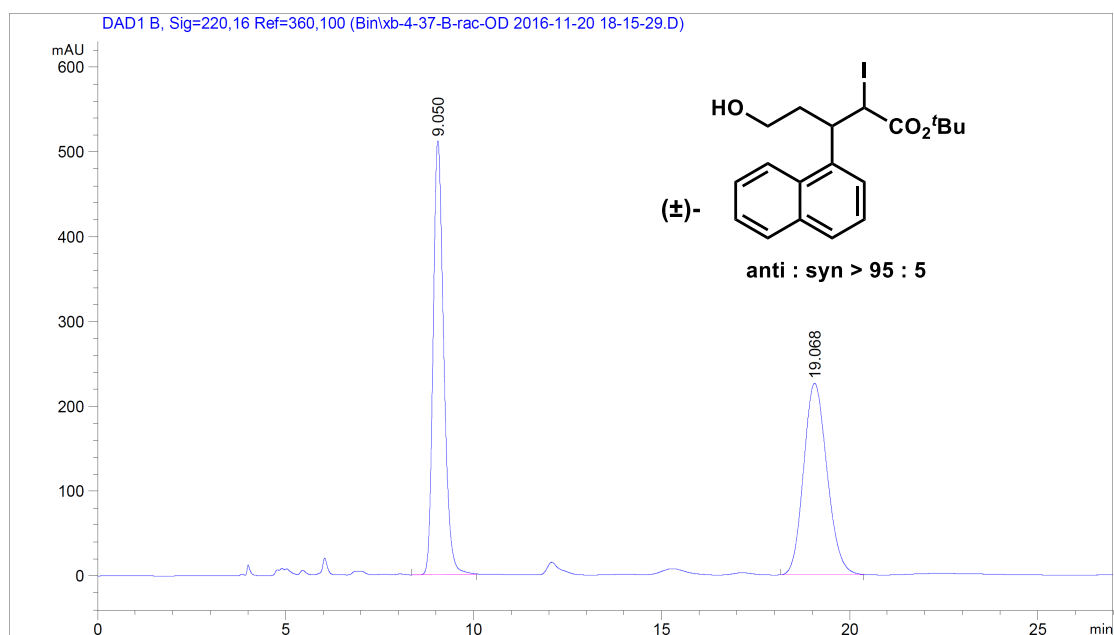

| Peak # | RetTime [min] | Type | Width [min] | Area [mAU*s] | Area %  |
|--------|---------------|------|-------------|--------------|---------|
| 1      | 9.050         | VB   | 0.3010      | 1.00012e4    | 50.4950 |
| 2      | 19.068        | BB   | 0.6731      | 9805.08105   | 49.5050 |

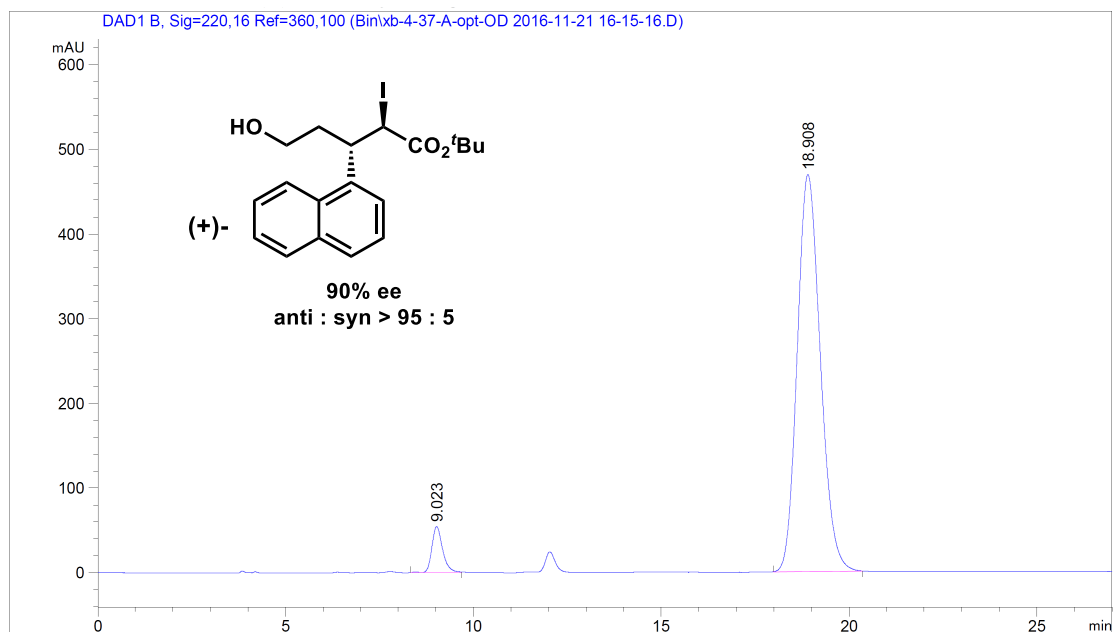

| Peak # | RetTime [min] | Type | Width [min] | Area [mAU*s] | Area %  |
|--------|---------------|------|-------------|--------------|---------|
| 1      | 9.023         | BB   | 0.3050      | 1084.06201   | 5.1268  |
| 2      | 18.908        | BB   | 0.6650      | 2.00610e4    | 94.8732 |

**(+)-*tert*-Butyl (2*R*, 3*S*)-5-hydroxy-2-iodo-3-(naphthalen-2-yl)pentanoate, 6d**

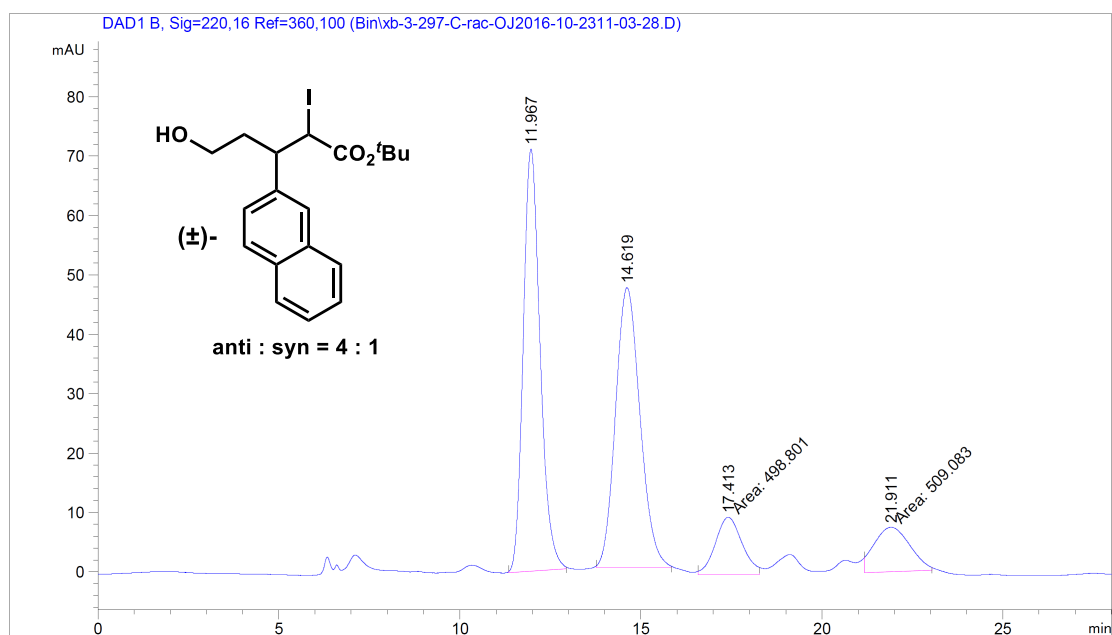

| Peak # | RetTime [min] | Type | Width [min] | Area [mAU*s] | Area %  | Name |
|--------|---------------|------|-------------|--------------|---------|------|
| 1      | 11.967        | BB   | 0.4966      | 2298.86743   | 41.5474 | ?    |
| 2      | 14.619        | BB   | 0.7088      | 2226.37305   | 40.2372 | ?    |
| 3      | 17.413        | MM   | 0.8573      | 498.80063    | 9.0148  | ?    |
| 4      | 21.911        | MM   | 1.1362      | 509.08344    | 9.2007  | ?    |

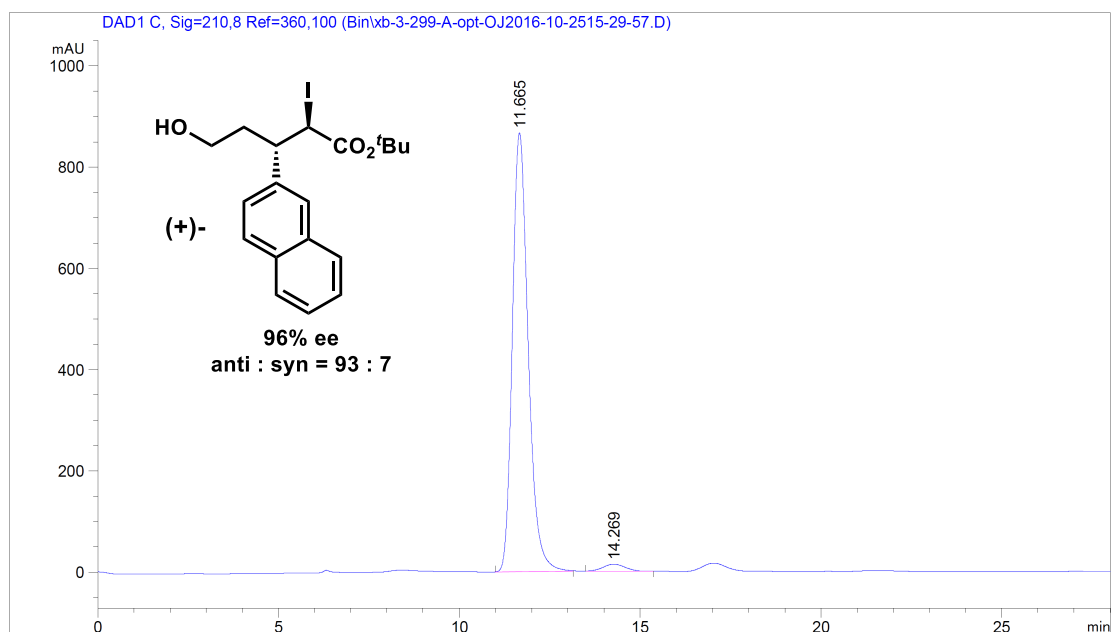

| Peak # | RetTime [min] | Type | Width [min] | Area [mAU*s] | Area %  | Name |
|--------|---------------|------|-------------|--------------|---------|------|
| 1      | 11.665        | BB   | 0.4678      | 2.62922e4    | 97.8991 | ?    |
| 2      | 14.269        | BB   | 0.5571      | 564.23779    | 2.1009  | ?    |

**(+)-*tert*-Butyl (2*R*, 3*S*)-3-(4-acetylphenyl)-2-iodopent-4-enoate, 5e**

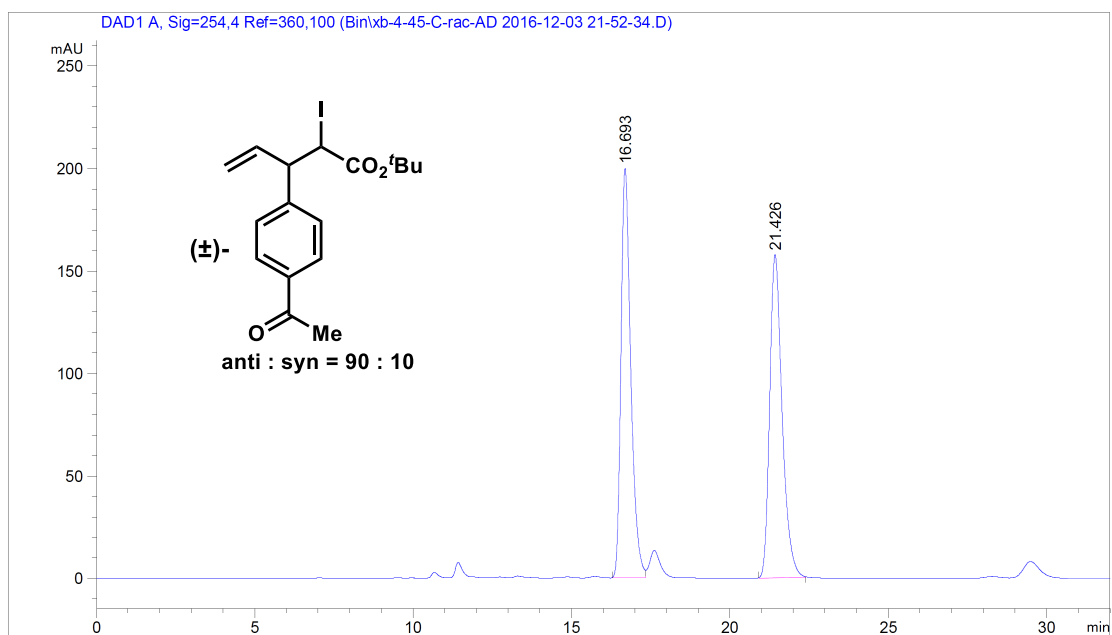

| Peak # | RetTime [min] | Type | Width [min] | Area [mAU*s] | Area %  |
|--------|---------------|------|-------------|--------------|---------|
| 1      | 16.693        | BV   | 0.3268      | 4314.40137   | 50.0348 |
| 2      | 21.426        | BB   | 0.4118      | 4308.40332   | 49.9652 |

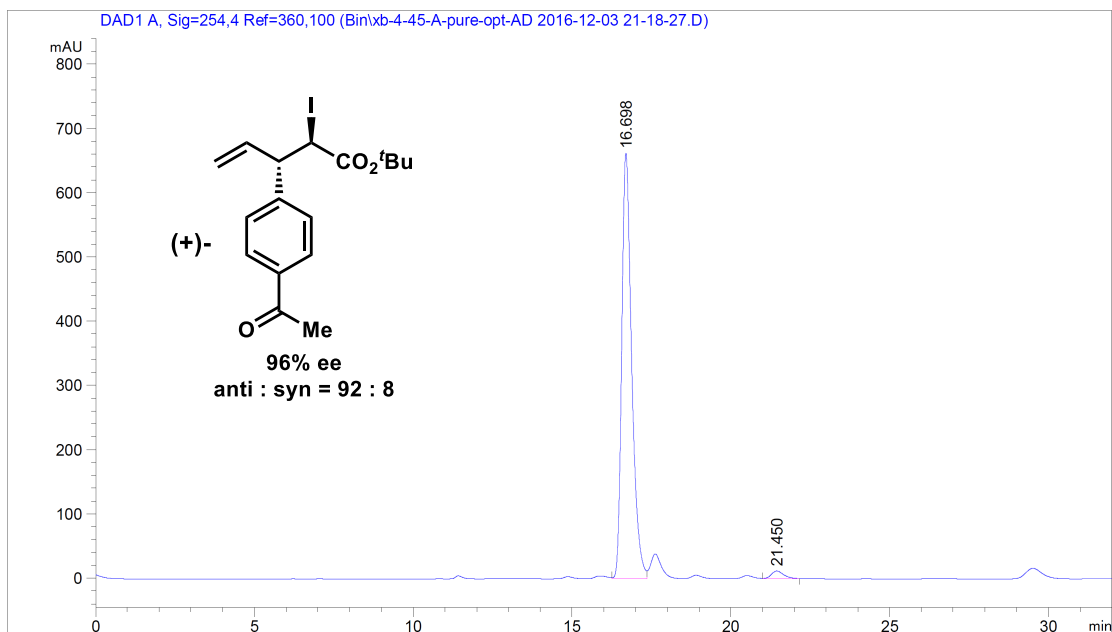

| Peak # | RetTime [min] | Type | Width [min] | Area [mAU*s] | Area %  |
|--------|---------------|------|-------------|--------------|---------|
| 1      | 16.698        | VV   | 0.3303      | 1.44331e4    | 97.8395 |
| 2      | 21.450        | VB   | 0.3914      | 318.70676    | 2.1605  |



**(+)-Methyl 4-((3*S*, 4*R*)-5-(*tert*-butoxy)-4-iodo-5-oxopent-1-en-3-yl)benzoate, 5f**

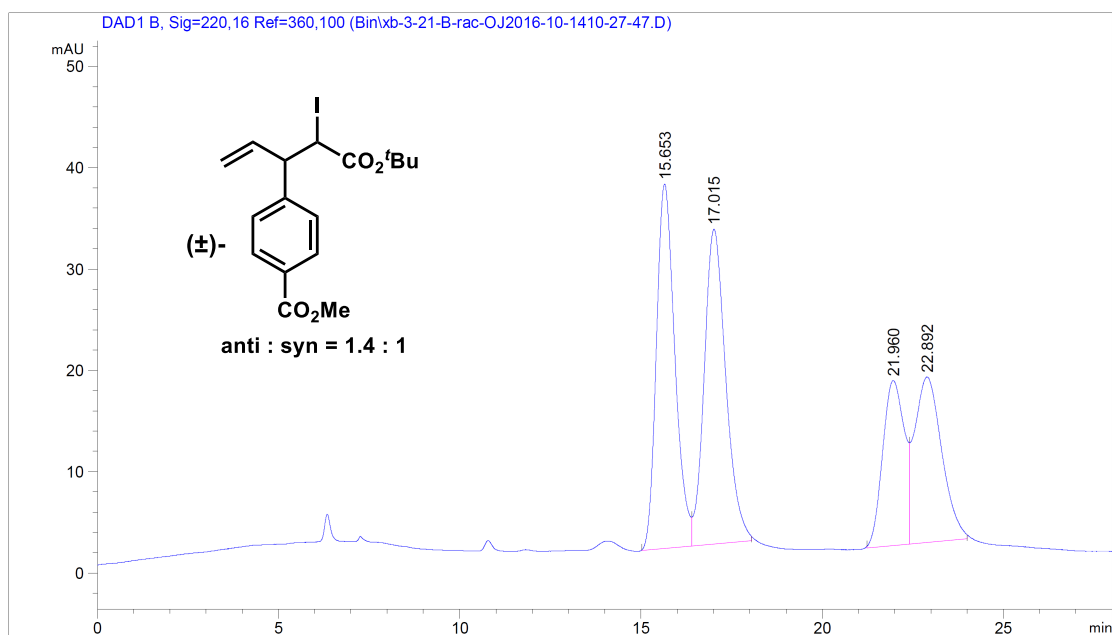

| Peak # | RetTime [min] | Type | Width [min] | Area [mAU*s] | Area %  | Name |
|--------|---------------|------|-------------|--------------|---------|------|
| 1      | 15.653        | BV   | 0.5323      | 1271.77173   | 31.1124 | ?    |
| 2      | 17.015        | VB   | 0.6315      | 1287.41833   | 31.4952 | ?    |
| 3      | 21.960        | BV   | 0.6105      | 679.67938    | 16.6276 | ?    |
| 4      | 22.892        | VB   | 0.7389      | 848.79938    | 20.7649 | ?    |

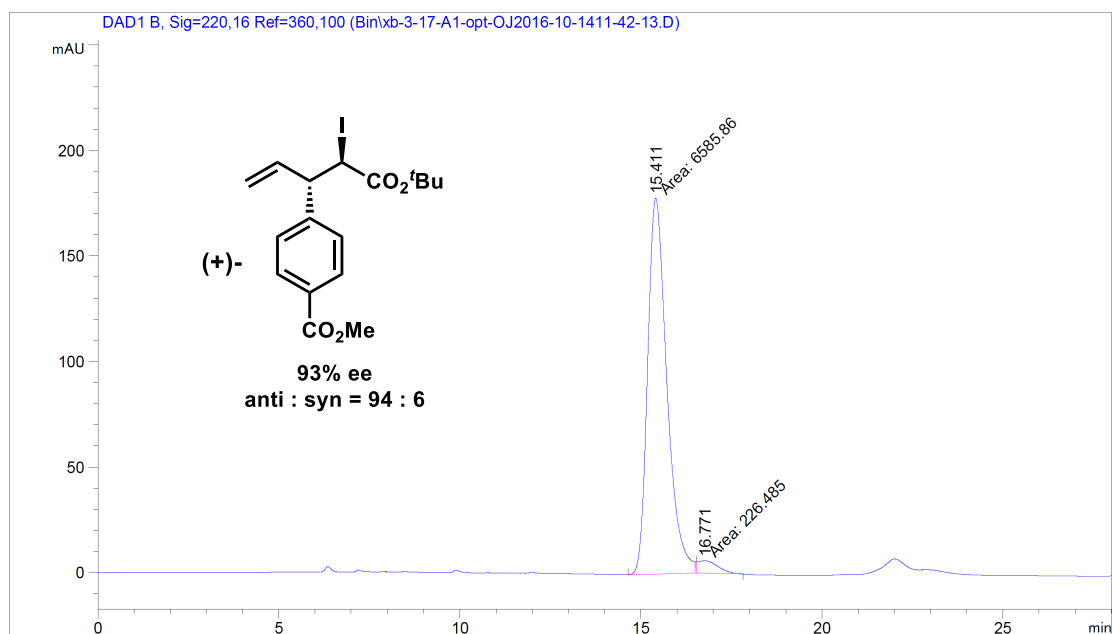

| Peak # | RetTime [min] | Type | Width [min] | Area [mAU*s] | Area %  | Name |
|--------|---------------|------|-------------|--------------|---------|------|
| 1      | 15.411        | MM   | 0.6161      | 6585.86328   | 96.6754 | ?    |
| 2      | 16.771        | MM   | 0.6374      | 226.48479    | 3.3246  | ?    |

**(+)-*tert*-Butyl (2*R*, 3*S*)-3-(4-(dimethylcarbamoyl)phenyl)-2-iodopent-4-enoate, 5g**

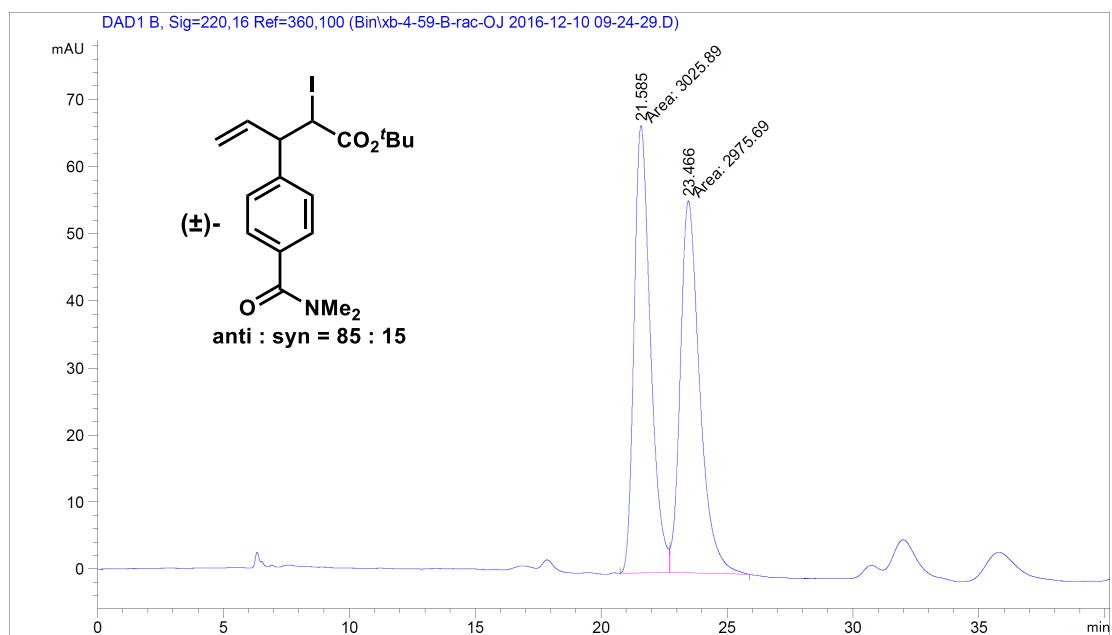

| Peak # | RetTime [min] | Type | Width [min] | Area [mAU*s] | Area %  |
|--------|---------------|------|-------------|--------------|---------|
| 1      | 21.585        | MM   | 0.7563      | 3025.88696   | 50.4182 |
| 2      | 23.466        | MM   | 0.8946      | 2975.69312   | 49.5818 |

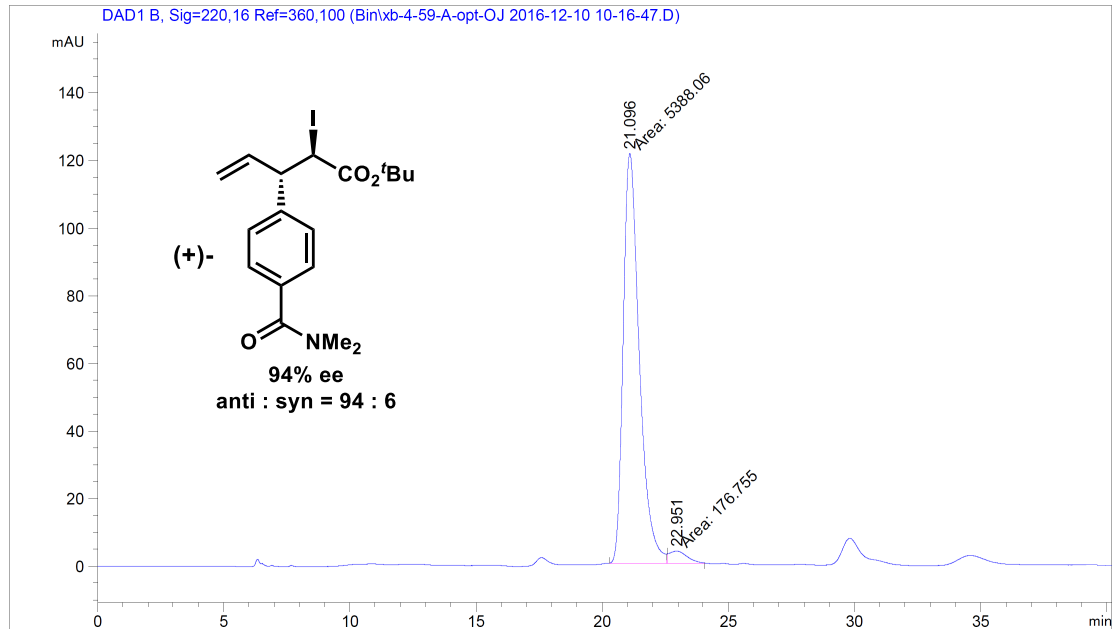

| Peak # | RetTime [min] | Type | Width [min] | Area [mAU*s] | Area %  |
|--------|---------------|------|-------------|--------------|---------|
| 1      | 21.096        | MM   | 0.7406      | 5388.05811   | 96.8237 |
| 2      | 22.951        | MM   | 0.8223      | 176.75499    | 3.1763  |

**(+)-*tert*-Butyl (2*R*, 3*S*)-3-(4-fluorophenyl)-5-hydroxy-2-iodopentanoate, 6h**

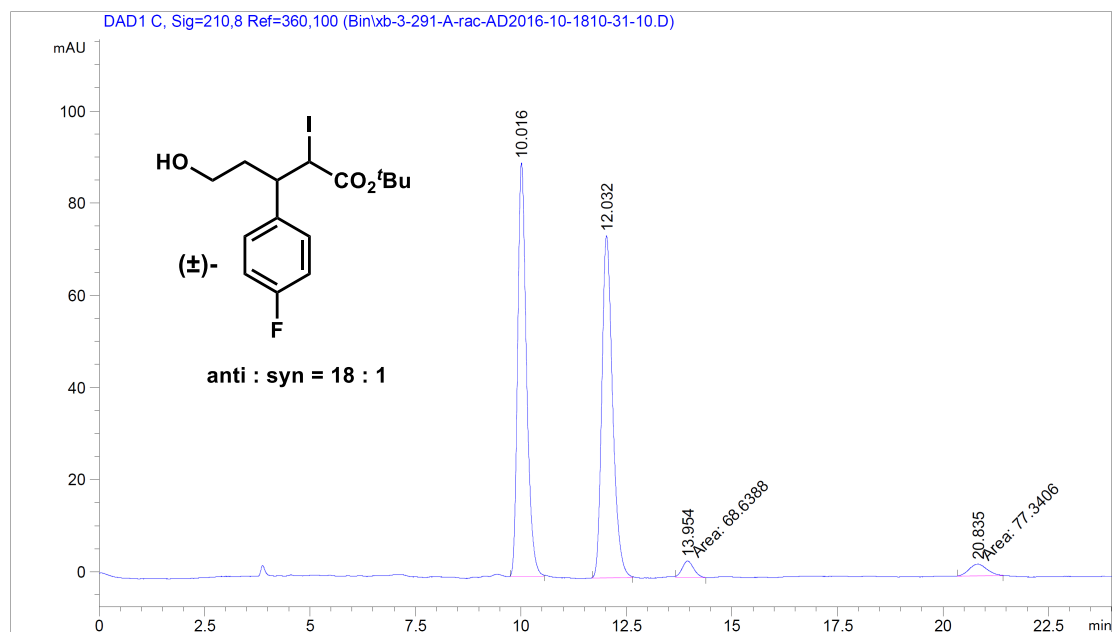

| Peak # | RetTime [min] | Type | Width [min] | Area [mAU*s] | Area %  | Name |
|--------|---------------|------|-------------|--------------|---------|------|
| 1      | 10.016        | BB   | 0.2208      | 1306.37756   | 47.1625 | ?    |
| 2      | 12.032        | BB   | 0.2698      | 1317.59180   | 47.5674 | ?    |
| 3      | 13.954        | MM   | 0.3166      | 68.63876     | 2.4780  | ?    |
| 4      | 20.835        | MM   | 0.4980      | 77.34064     | 2.7921  | ?    |

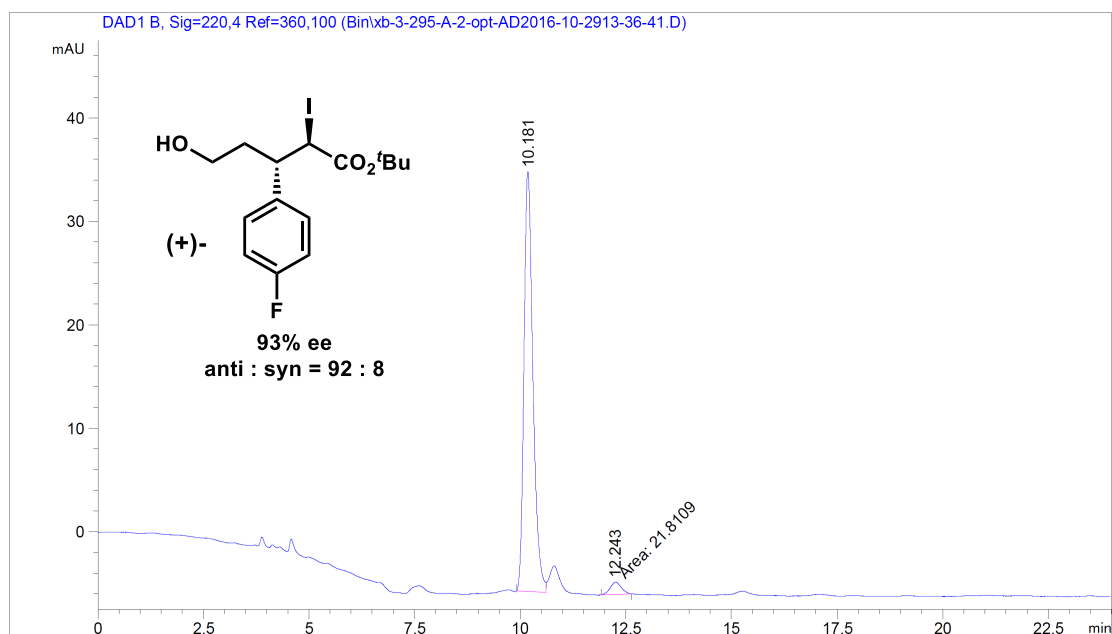

| Peak # | RetTime [min] | Type | Width [min] | Area [mAU*s] | Area %  | Name |
|--------|---------------|------|-------------|--------------|---------|------|
| 1      | 10.181        | BB   | 0.2243      | 599.35931    | 96.4887 | ?    |
| 2      | 12.243        | MM   | 0.3063      | 21.81087     | 3.5113  | ?    |

**(+)-tert-Butyl  
3S)-5-hydroxy-2-iodo-3-(4-(trifluoromethoxy)phenyl)pentanoate, 6i**

**(2R,**

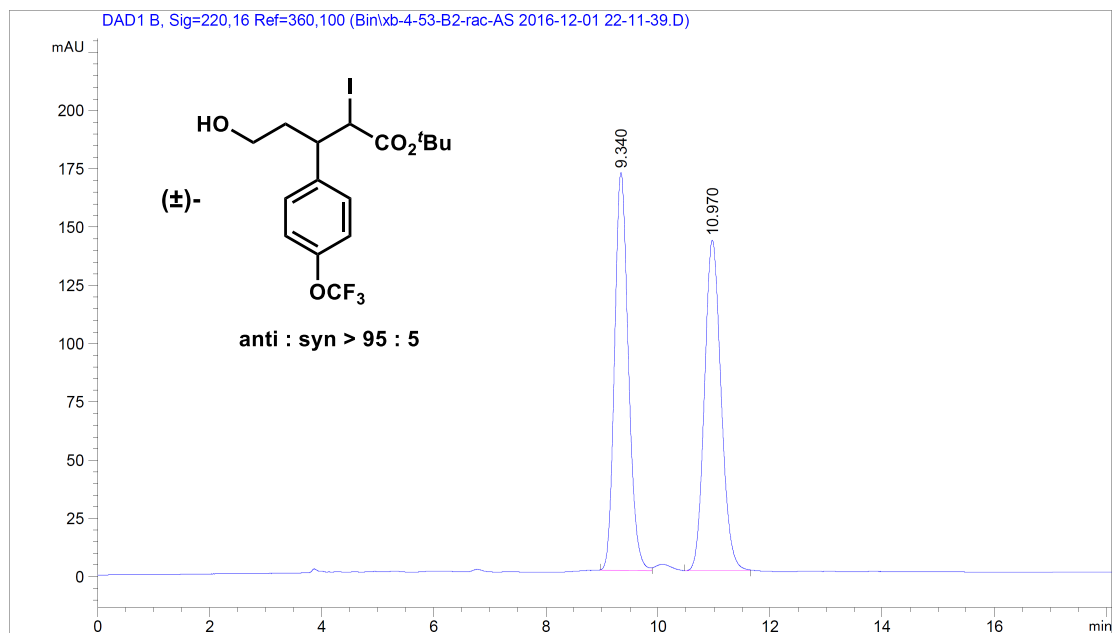

| Peak # | RetTime [min] | Type | Width [min] | Area [mAU*s] | Area %  |
|--------|---------------|------|-------------|--------------|---------|
| 1      | 9.340         | BB   | 0.2636      | 2922.66309   | 49.9983 |
| 2      | 10.970        | VB   | 0.3194      | 2922.86060   | 50.0017 |

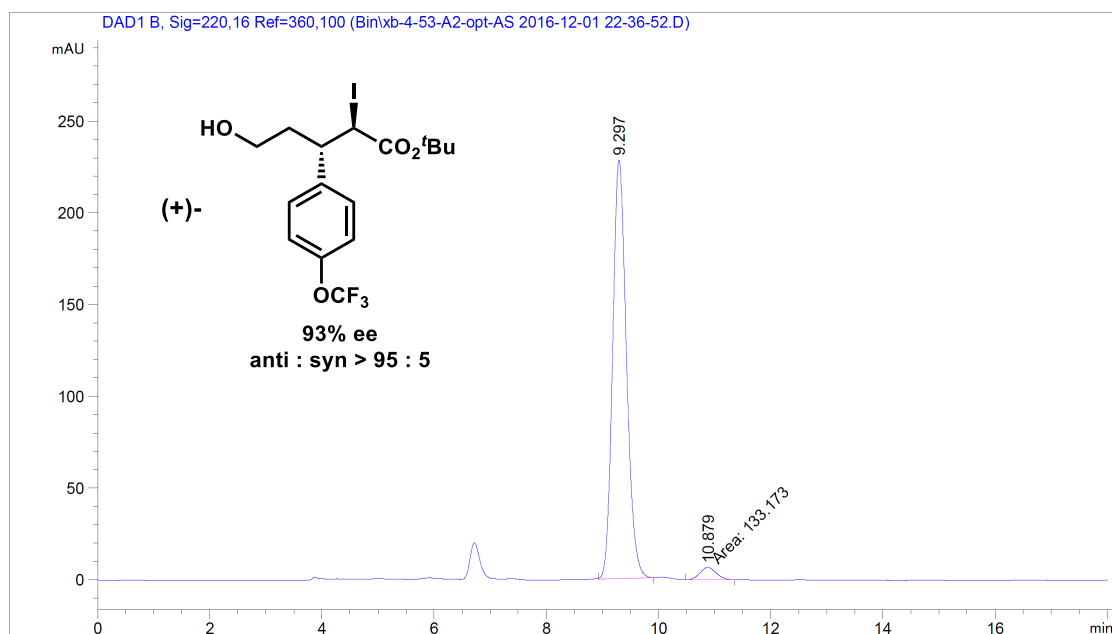

| Peak # | RetTime [min] | Type | Width [min] | Area [mAU*s] | Area %  |
|--------|---------------|------|-------------|--------------|---------|
| 1      | 9.297         | BB   | 0.2630      | 3890.41846   | 96.6902 |
| 2      | 10.879        | MM   | 0.3313      | 133.17302    | 3.3098  |

**(+)-*tert*-Butyl (2*R*, 3*S*)-5-hydroxy-2-iodo-3-(3-(trifluoromethyl)phenyl)pentanoate, 6j**

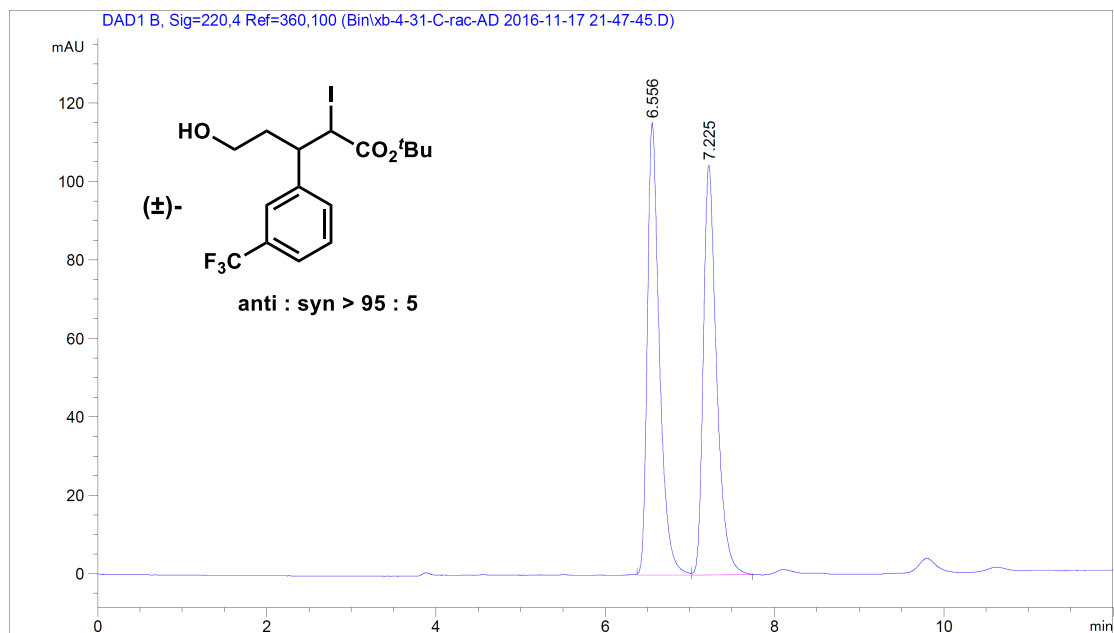

| Peak # | RetTime [min] | Type | Width [min] | Area [mAU*s] | Area %  |
|--------|---------------|------|-------------|--------------|---------|
| 1      | 6.556         | BV   | 0.1478      | 1145.57678   | 50.0529 |
| 2      | 7.225         | VB   | 0.1645      | 1143.15527   | 49.9471 |

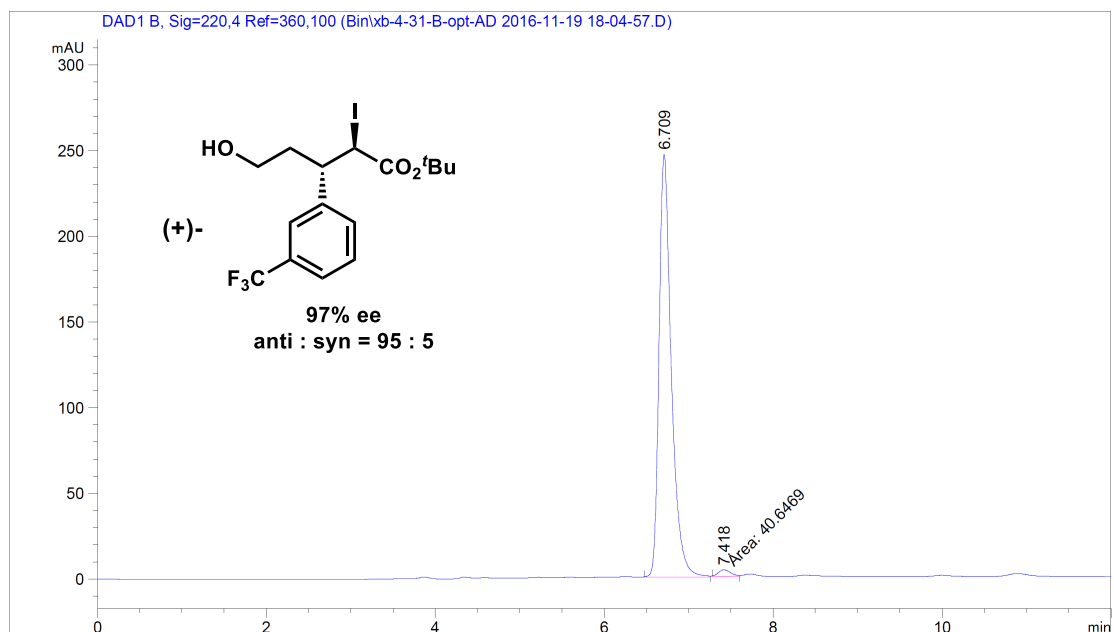

| Peak # | RetTime [min] | Type | Width [min] | Area [mAU*s] | Area %  |
|--------|---------------|------|-------------|--------------|---------|
| 1      | 6.709         | BB   | 0.1505      | 2486.08887   | 98.3913 |
| 2      | 7.418         | MM   | 0.1711      | 40.64690     | 1.6087  |

**(+)-*tert*-Butyl (2*R*, 3*S*)-5-hydroxy-2-iodo-3-(*m*-tolyl)pentanoate, 6k**

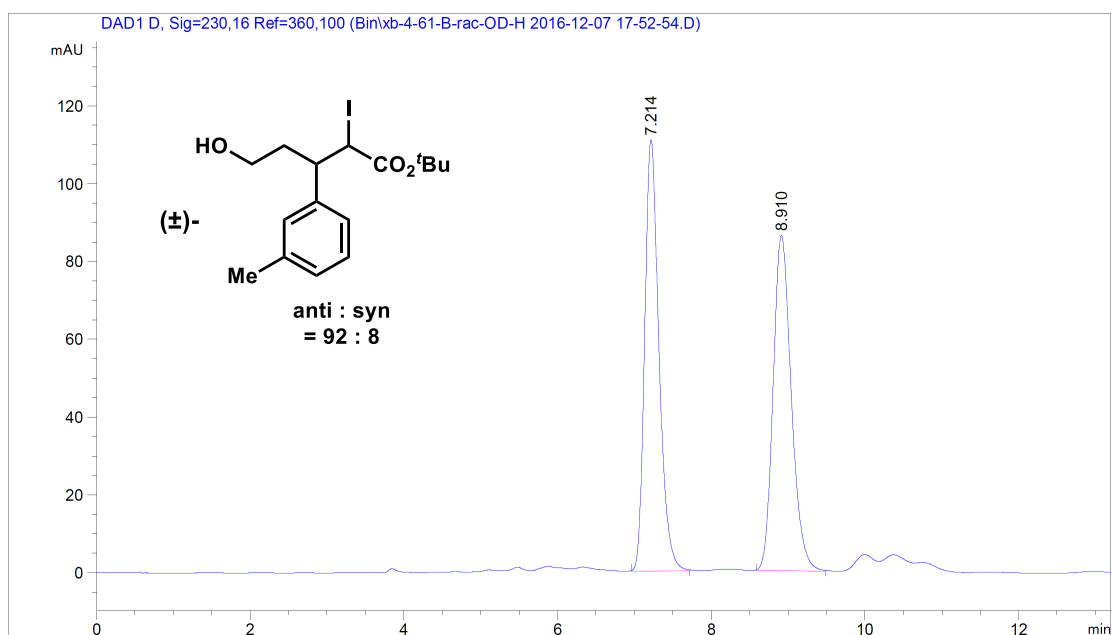

| Peak # | RetTime [min] | Type | Width [min] | Area [mAU*s] | Area %  |
|--------|---------------|------|-------------|--------------|---------|
| 1      | 7.214         | BB   | 0.1972      | 1426.82507   | 50.2572 |
| 2      | 8.910         | BB   | 0.2521      | 1412.22205   | 49.7428 |

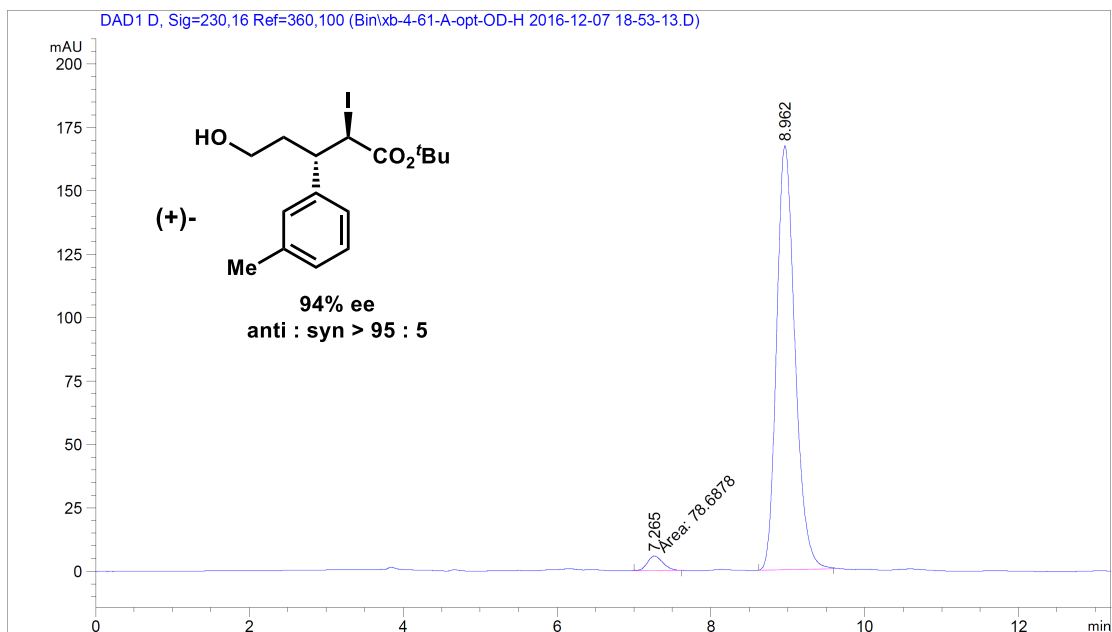

| Peak # | RetTime [min] | Type | Width [min] | Area [mAU*s] | Area %  |
|--------|---------------|------|-------------|--------------|---------|
| 1      | 7.265         | MM   | 0.2299      | 78.68779     | 2.7558  |
| 2      | 8.962         | BB   | 0.2546      | 2776.62085   | 97.2442 |

**(+)-*tert*-Butyl (2*R*, 3*S*)-3-(2-chlorophenyl)-5-hydroxy-2-iodopentanoate, 6l**

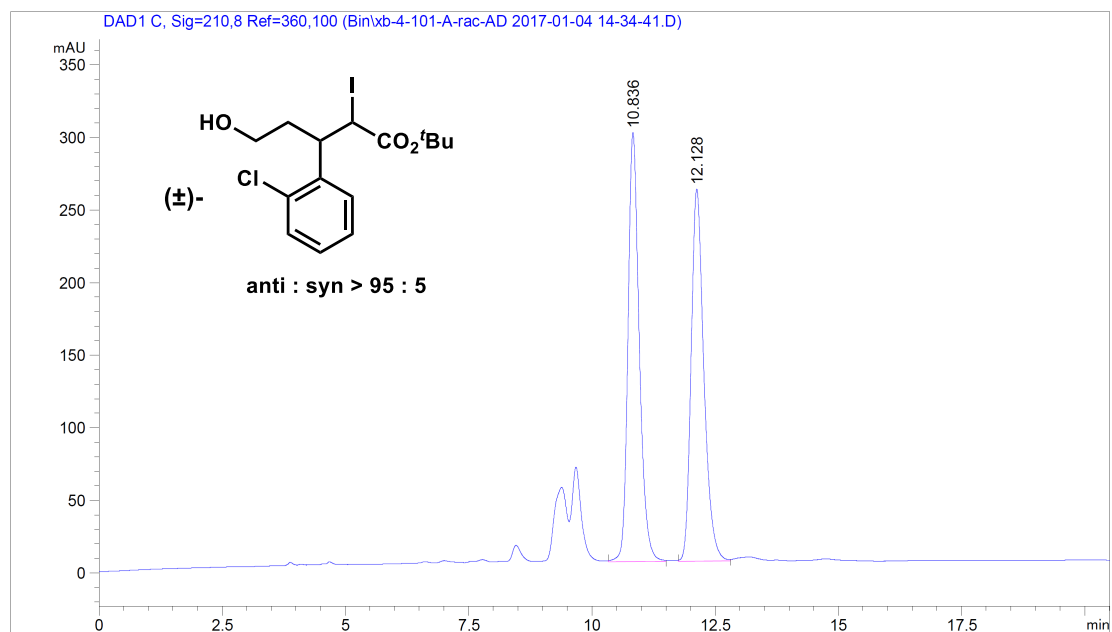

| Peak # | RetTime [min] | Type | Width [min] | Area [mAU*s] | Area %  |
|--------|---------------|------|-------------|--------------|---------|
| 1      | 10.836        | BB   | 0.2416      | 4704.47412   | 50.4599 |
| 2      | 12.128        | BB   | 0.2743      | 4618.71045   | 49.5401 |

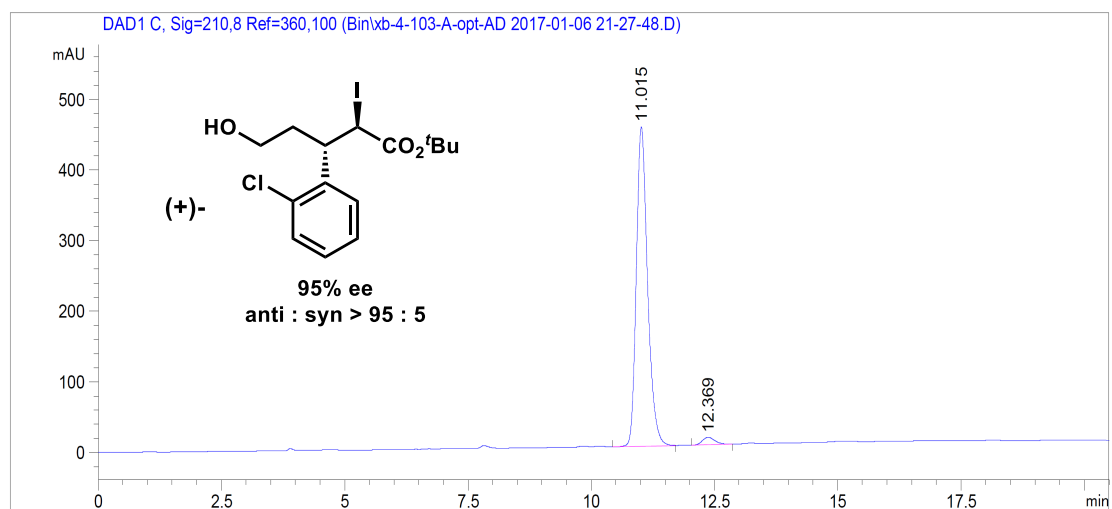

| Peak # | RetTime [min] | Type | Width [min] | Area [mAU*s] | Area %  |
|--------|---------------|------|-------------|--------------|---------|
| 1      | 11.015        | VB   | 0.2437      | 7203.25586   | 97.4041 |
| 2      | 12.369        | BB   | 0.2735      | 191.97359    | 2.5959  |

### (+)-*tert*-Butyl (2*R*, 3*S*)-3-(2-bromophenyl)-5-hydroxy-2-iodopentanoate, 6m

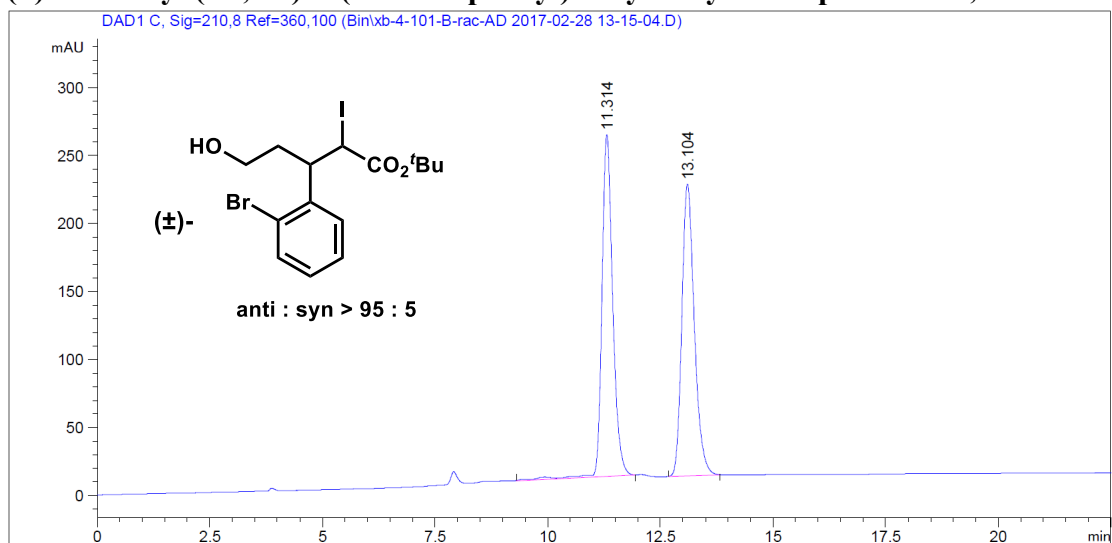

| Peak # | RetTime [min] | Type | Width [min] | Area [mAU*s] | Area %  | Name |
|--------|---------------|------|-------------|--------------|---------|------|
| 1      | 11.314        | BB   | 0.2536      | 4192.00830   | 50.3711 | ?    |
| 2      | 13.104        | BB   | 0.2944      | 4130.23828   | 49.6289 | ?    |

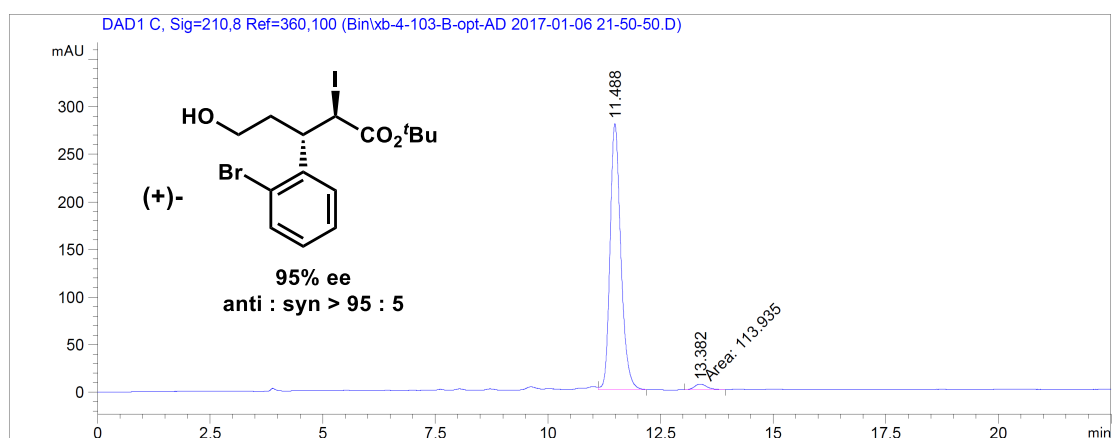

| Peak # | RetTime [min] | Type | Width [min] | Area [mAU*s] | Area %  | Name |
|--------|---------------|------|-------------|--------------|---------|------|
| 1      | 11.488        | VB   | 0.2530      | 4651.80518   | 97.6093 |      |
| 2      | 13.382        | MM   | 0.3184      | 113.93534    | 2.3907  |      |



### (+)-*tert*-Butyl (2*R*, 3*R*)-3-ethyl-5-hydroxy-2-iodopentanoate, 6n

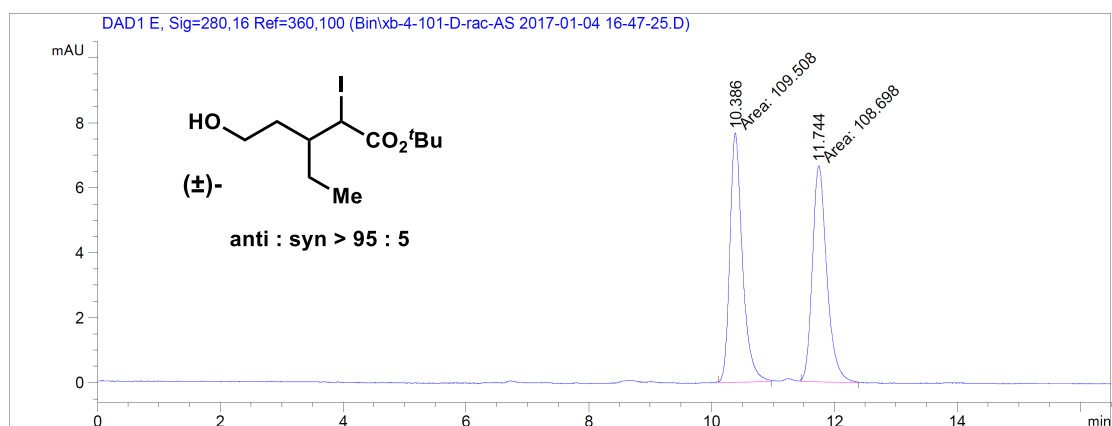

| Peak # | RetTime [min] | Type | Width [min] | Area [mAU*s] | Area %  |
|--------|---------------|------|-------------|--------------|---------|
| 1      | 10.386        | MM   | 0.2379      | 109.50795    | 50.1857 |
| 2      | 11.744        | MM   | 0.2723      | 108.69774    | 49.8143 |

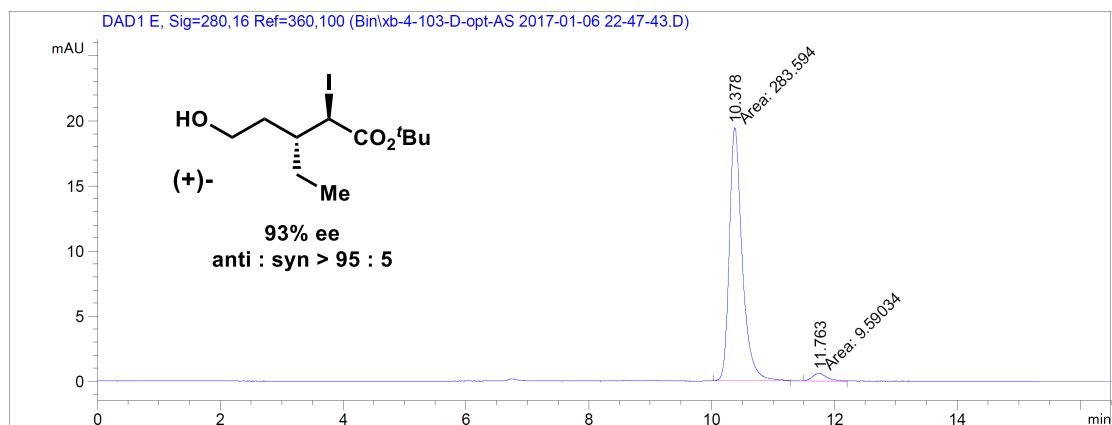

| Peak # | RetTime [min] | Type | Width [min] | Area [mAU*s] | Area %  |
|--------|---------------|------|-------------|--------------|---------|
| 1      | 10.378        | MM   | 0.2430      | 283.59424    | 96.7289 |
| 2      | 11.763        | MM   | 0.2735      | 9.59034      | 3.2711  |

**(+)-tert-Butyl (2*R*, 3*R*)-3-(2-hydroxyethyl)-2-iodononanoate, 6o**

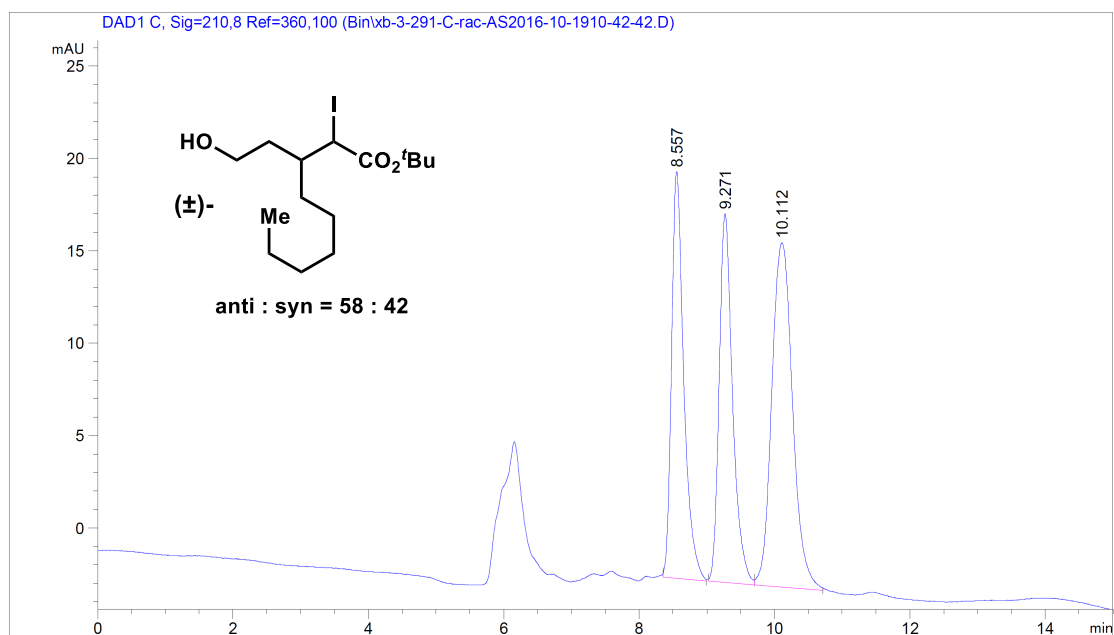

| Peak # | RetTime [min] | Type | Width [min] | Area [mAU*s] | Area %  |
|--------|---------------|------|-------------|--------------|---------|
| 1      | 8.557         | BB   | 0.1858      | 275.26901    | 29.0346 |
| 2      | 9.271         | BB   | 0.2090      | 275.31021    | 29.0390 |
| 3      | 10.112        | BB   | 0.3389      | 397.49271    | 41.9264 |

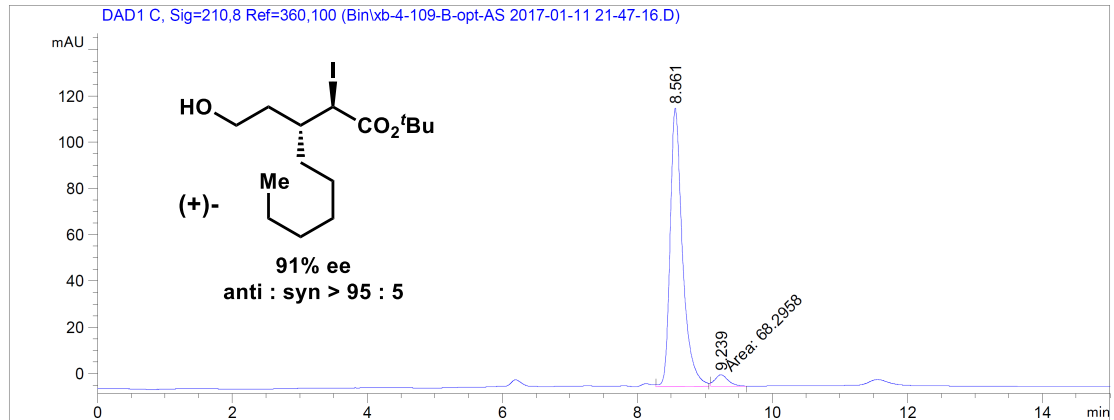

| Peak # | RetTime [min] | Type | Width [min] | Area [mAU*s] | Area %  |
|--------|---------------|------|-------------|--------------|---------|
| 1      | 8.561         | WV   | 0.1896      | 1532.30237   | 95.7331 |
| 2      | 9.239         | MM   | 0.2277      | 68.29581     | 4.2669  |

(+)-*tert*-Butyl

(2*R*,

3*S*)-3-(((*tert*-butyldimethylsilyl)oxy)methyl)-5-hydroxy-2-iodopentanoate, 6p

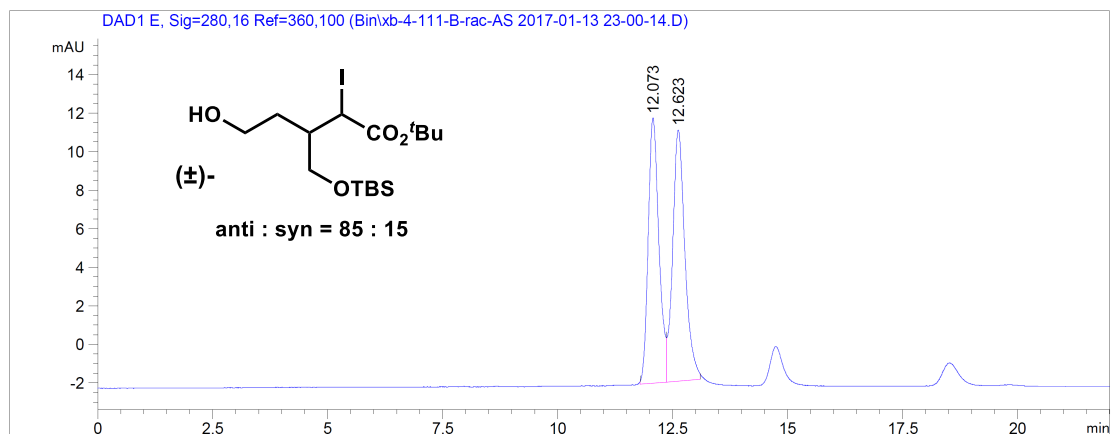

| Peak # | RetTime [min] | Type | Width [min] | Area [mAU*s] | Area %  | Name |
|--------|---------------|------|-------------|--------------|---------|------|
| 1      | 12.073        | BV   | 0.2443      | 223.45082    | 48.0523 | ?    |
| 2      | 12.623        | VB   | 0.2762      | 241.56548    | 51.9477 | ?    |

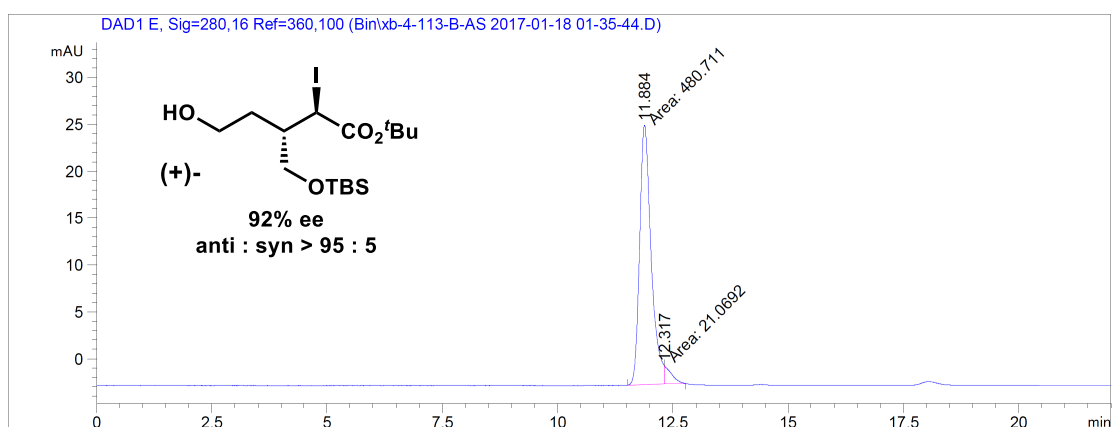

| Peak # | RetTime [min] | Type | Width [min] | Area [mAU*s] | Area %  | Name |
|--------|---------------|------|-------------|--------------|---------|------|
| 1      | 11.884        | MM   | 0.2895      | 480.71057    | 95.8011 | ?    |
| 2      | 12.317        | MM   | 0.1282      | 21.06917     | 4.1989  | ?    |

**(-)-*tert*-Butyl (2*S*, 3*S*)-2-(phenylthio)-3-((phenylthio)methyl)pent-4-enoate, 7q**

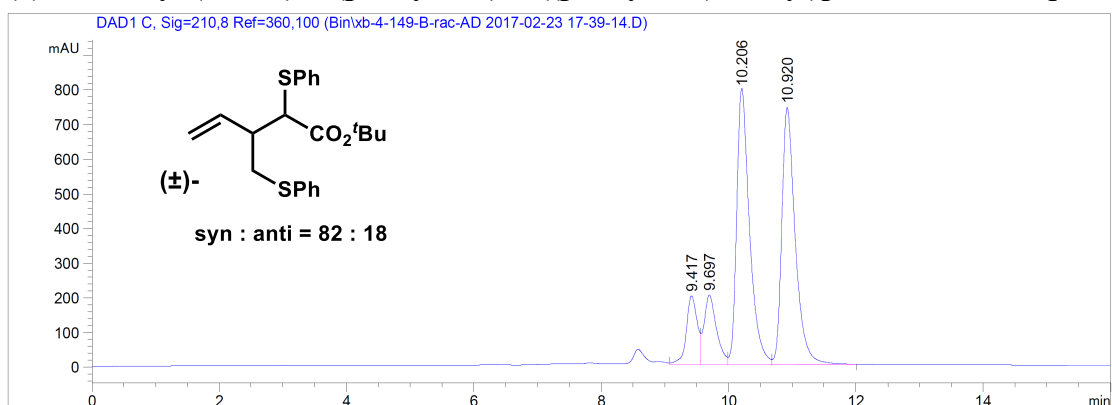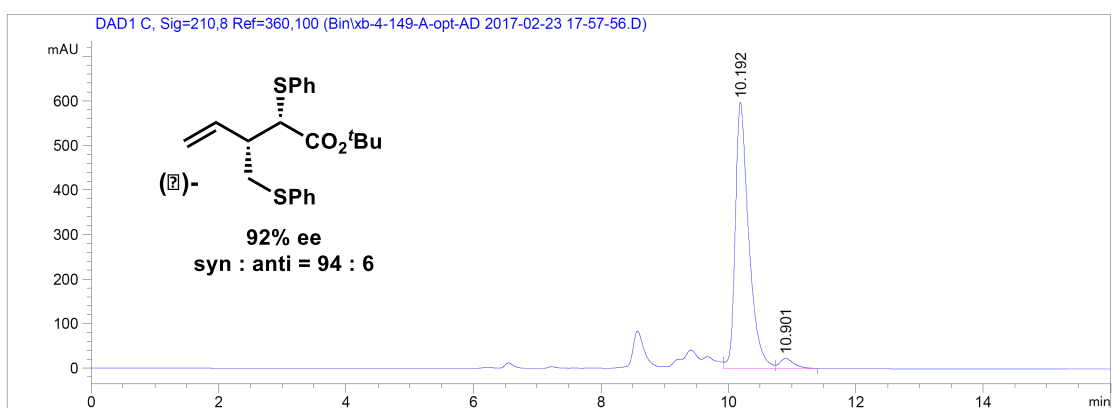

**(+)-tert-Butyl (2*R*, 3*S*)-2-iodo-3-(((4-methyl-*N*-phenylphenyl)sulfonamido)methyl)pent-4-enoate, 5r**

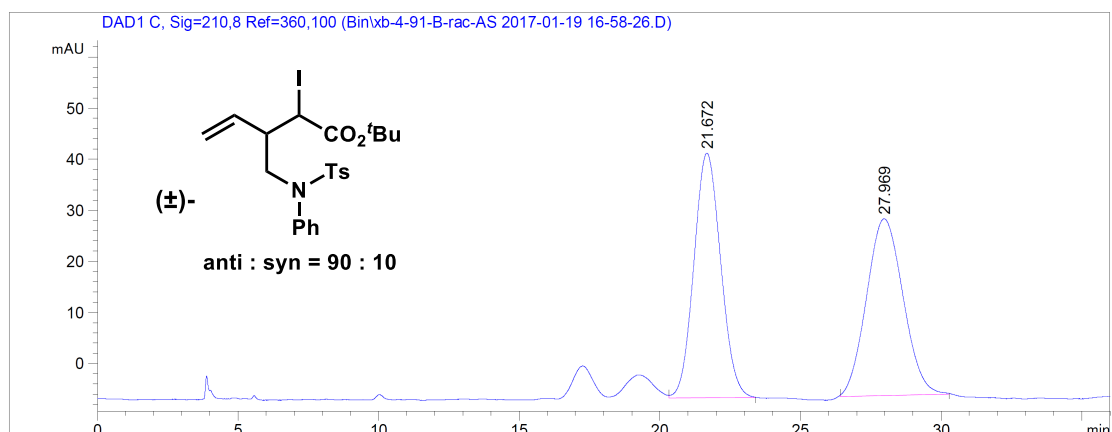

| Peak # | RetTime [min] | Type | Width [min] | Area [mAU*s] | Area %  | Name |
|--------|---------------|------|-------------|--------------|---------|------|
| 1      | 21.672        | VB   | 0.9756      | 3178.42651   | 50.3356 | ?    |
| 2      | 27.969        | BB   | 1.0776      | 3136.04785   | 49.6644 | ?    |

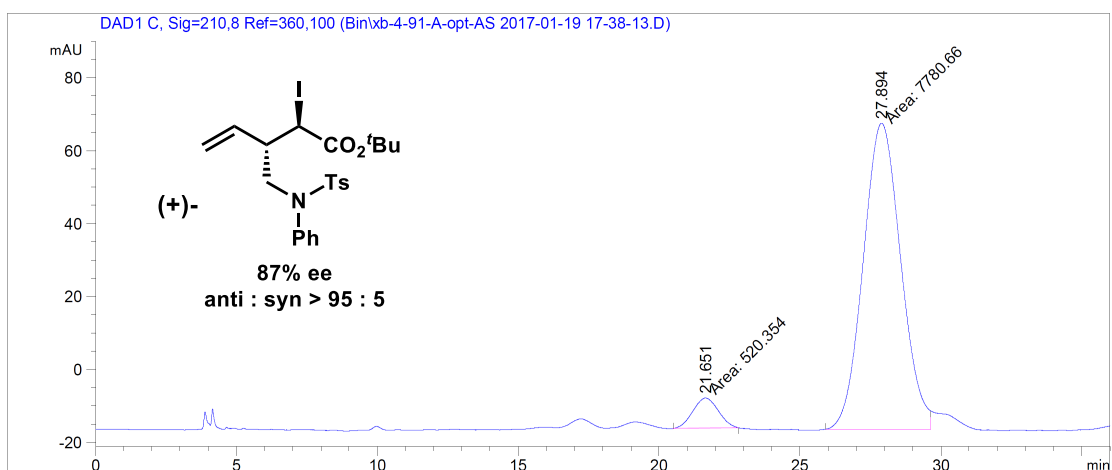

| Peak # | RetTime [min] | Type | Width [min] | Area [mAU*s] | Area %  | Name |
|--------|---------------|------|-------------|--------------|---------|------|
| 1      | 21.651        | MM   | 1.0455      | 520.35382    | 6.2686  | ?    |
| 2      | 27.894        | MM   | 1.5447      | 7780.65918   | 93.7314 | ?    |

### (+)-*tert*-Butyl (*R*)-5-hydroxy-2-iodo-3,3-dimethylpentanoate, 6s

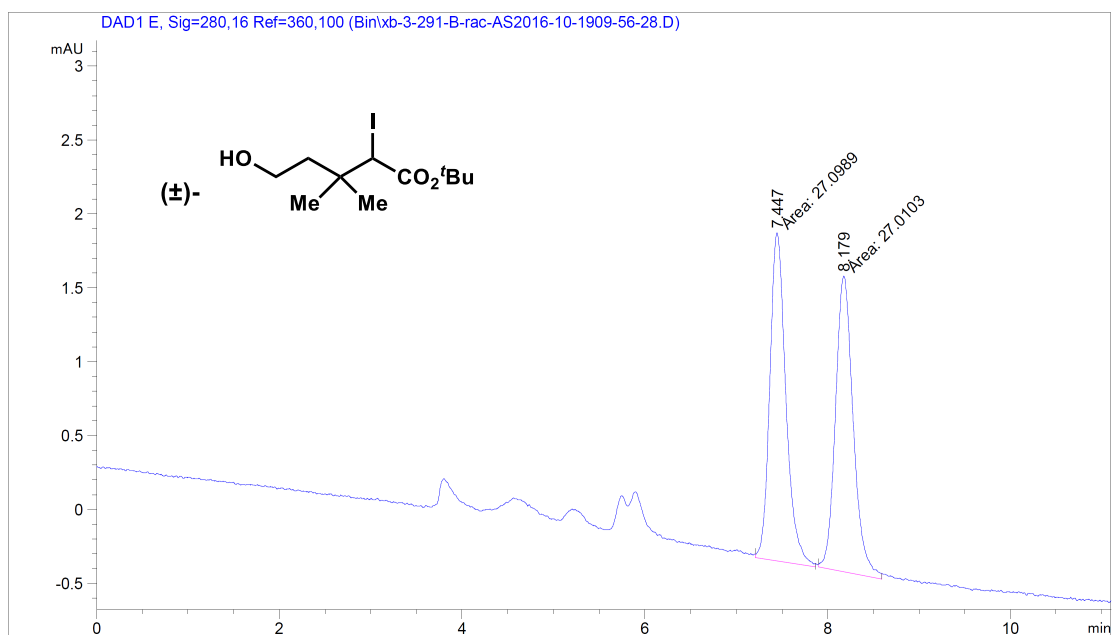

| Peak # | RetTime [min] | Type | Width [min] | Area [mAU*s] | Area %  |
|--------|---------------|------|-------------|--------------|---------|
| 1      | 7.447         | MM   | 0.2036      | 27.09895     | 50.0819 |
| 2      | 8.179         | MM   | 0.2249      | 27.01027     | 49.9181 |

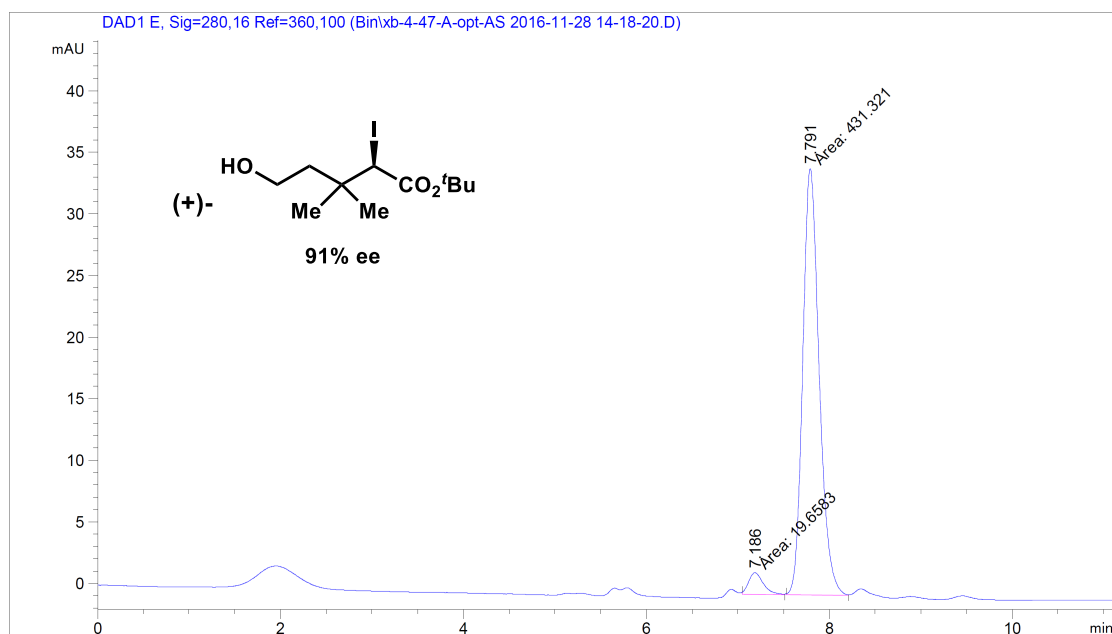

| Peak # | RetTime [min] | Type | Width [min] | Area [mAU*s] | Area %  |
|--------|---------------|------|-------------|--------------|---------|
| 1      | 7.186         | MM   | 0.1865      | 19.65832     | 4.3590  |
| 2      | 7.791         | MM   | 0.2077      | 431.32062    | 95.6410 |

**(+)-*tert*-Butyl (S)-2-(4-phenyl-1*H*-1,2,3-triazol-1-yl)-2-(1-vinylcyclopentyl)acetate, S11t**

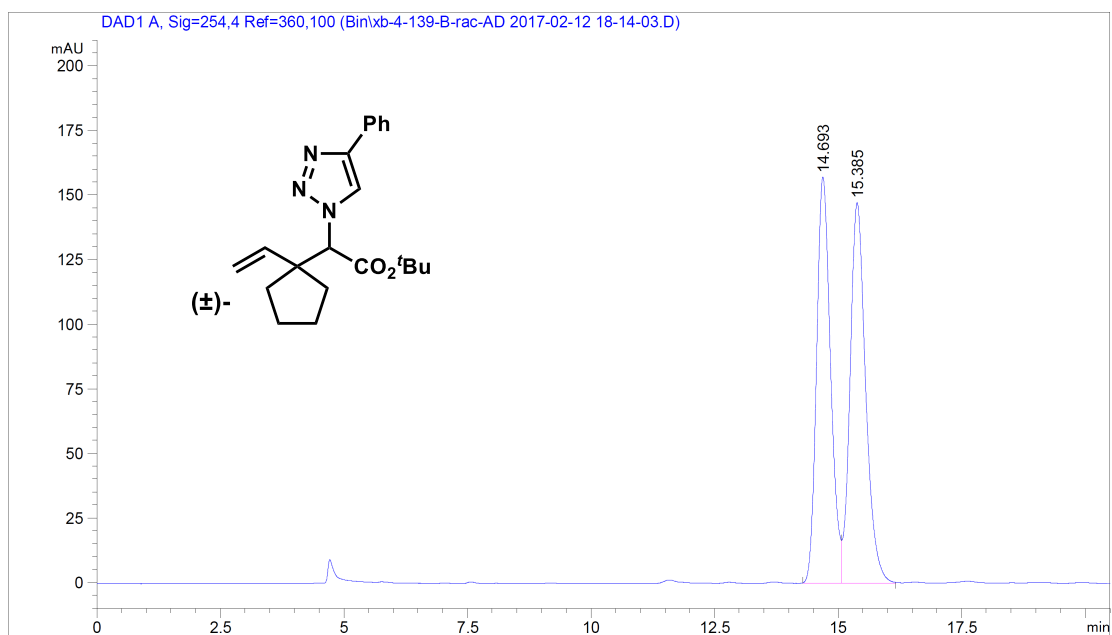

| Peak # | RetTime [min] | Type | Width [min] | Area [mAU*s] | Area %  | Name |
|--------|---------------|------|-------------|--------------|---------|------|
| 1      | 14.693        | BV   | 0.3010      | 3099.58105   | 48.9918 | ?    |
| 2      | 15.385        | VB   | 0.3317      | 3227.15137   | 51.0082 | ?    |

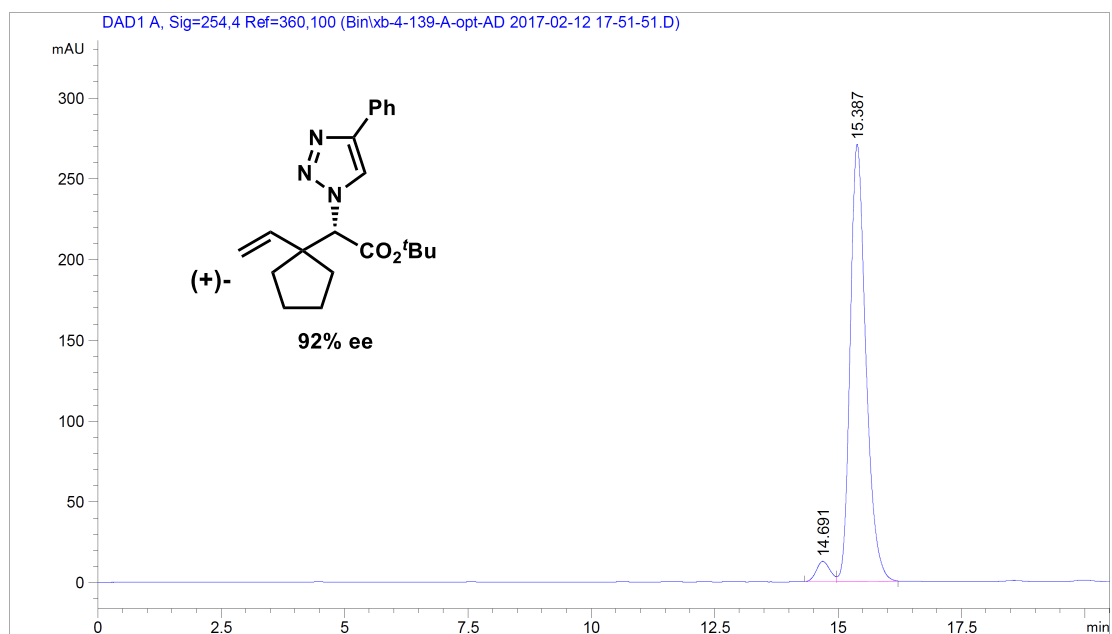

| Peak # | RetTime [min] | Type | Width [min] | Area [mAU*s] | Area %  | Name |
|--------|---------------|------|-------------|--------------|---------|------|
| 1      | 14.691        | BV   | 0.2970      | 241.88809    | 3.8866  | ?    |
| 2      | 15.387        | VB   | 0.3366      | 5981.82373   | 96.1134 | ?    |

**(+)-*tert*-Butyl (S)-2-(4-phenyl-1*H*-1,2,3-triazol-1-yl)-2-(1-vinylcyclohexyl)acetate, S11u**

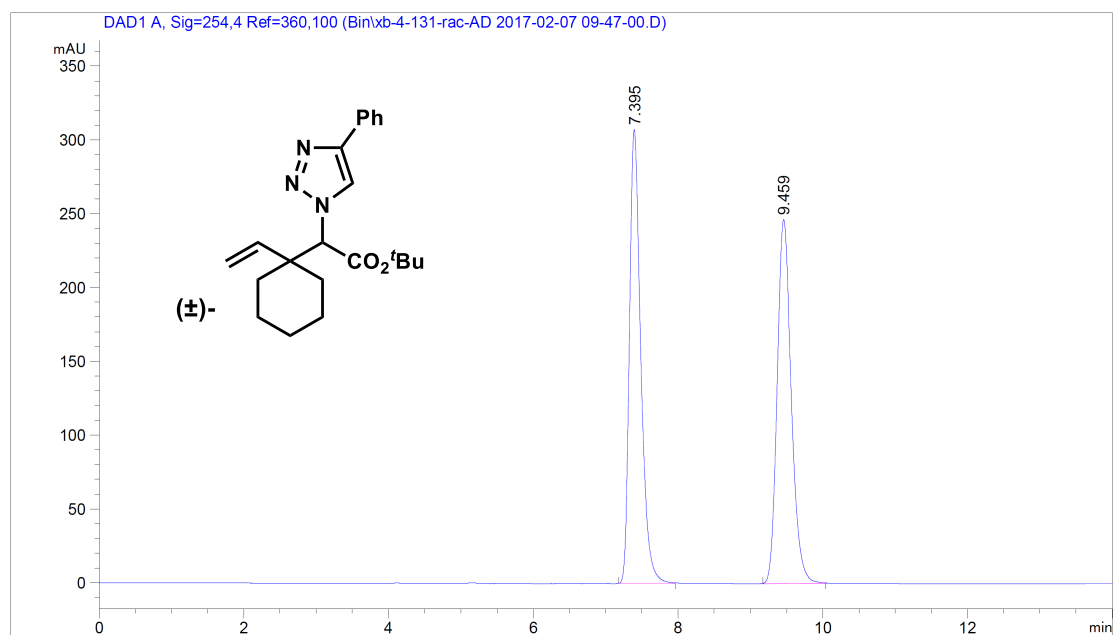

| Peak # | RetTime [min] | Type | Width [min] | Area [mAU*s] | Area %  | Name |
|--------|---------------|------|-------------|--------------|---------|------|
| 1      | 7.395         | BB   | 0.1643      | 3328.78564   | 50.0314 | ?    |
| 2      | 9.459         | BB   | 0.2073      | 3324.60376   | 49.9686 | ?    |

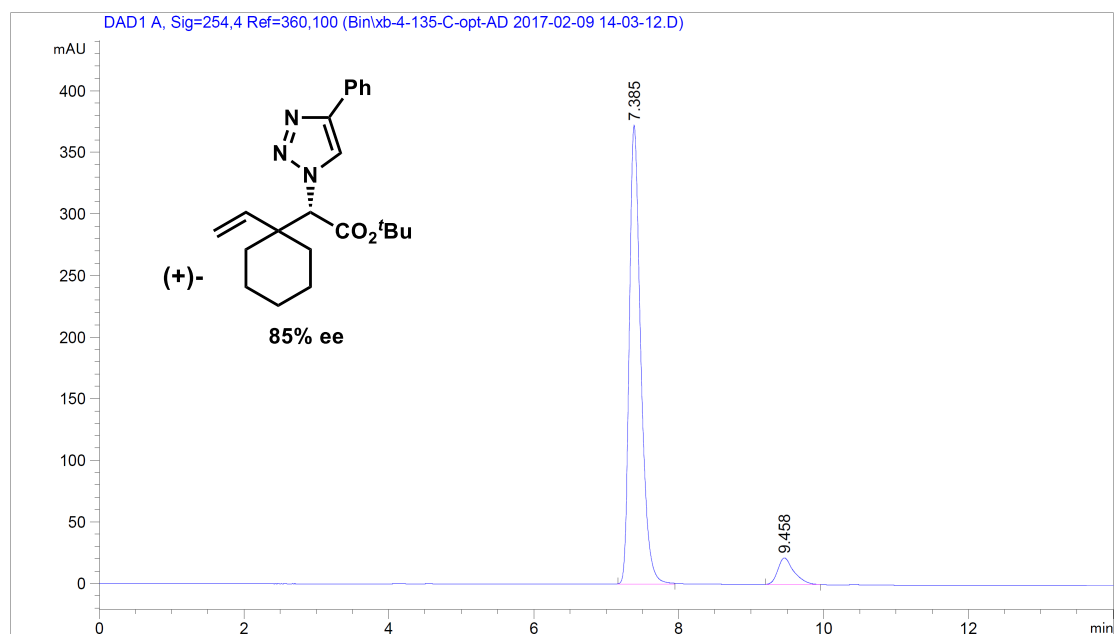

| Peak # | RetTime [min] | Type | Width [min] | Area [mAU*s] | Area %  | Name |
|--------|---------------|------|-------------|--------------|---------|------|
| 1      | 7.385         | BB   | 0.1651      | 4056.86499   | 92.3823 | ?    |
| 2      | 9.458         | BB   | 0.2289      | 334.52350    | 7.6177  | ?    |



**(+)-*tert*-Butyl (*R*)-2-(1-(2-hydroxyethyl)cycloheptyl)-2-iodoacetate, 6v**

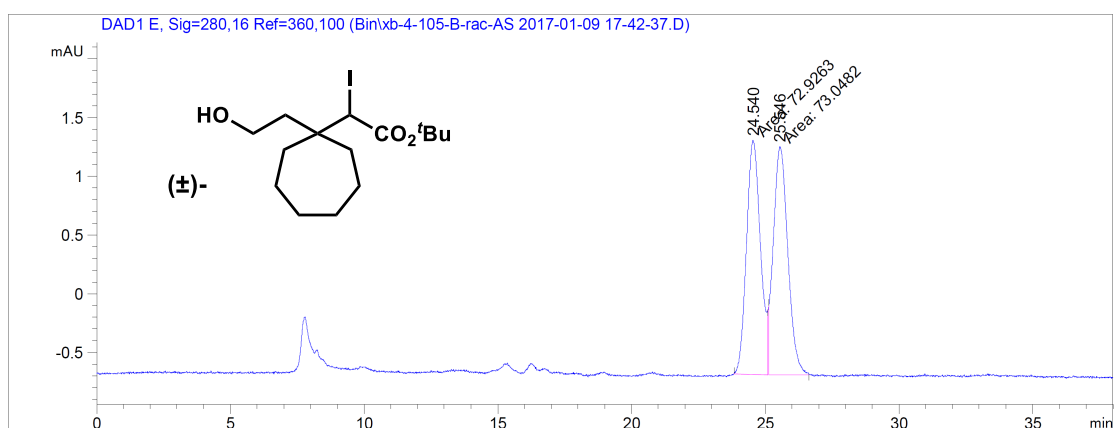

| Peak # | RetTime [min] | Type | Width [min] | Area [mAU*s] | Area %  |
|--------|---------------|------|-------------|--------------|---------|
| 1      | 24.540        | MM   | 0.6094      | 72.92627     | 49.9583 |
| 2      | 25.546        | MM   | 0.6269      | 73.04816     | 50.0417 |

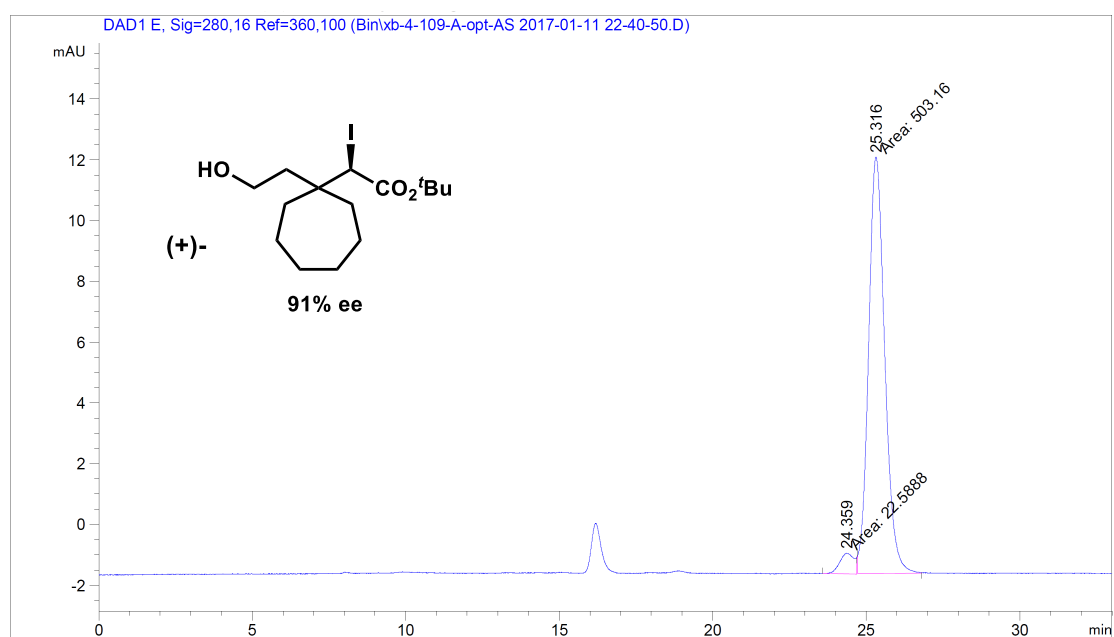

| Peak # | RetTime [min] | Type | Width [min] | Area [mAU*s] | Area %  | Name |
|--------|---------------|------|-------------|--------------|---------|------|
| 1      | 24.359        | MM   | 0.5500      | 22.58876     | 4.2965  | ?    |
| 2      | 25.316        | MM   | 0.6118      | 503.15973    | 95.7035 | ?    |

**(+)-*tert*-Butyl (*S*)-2-(4-phenyl-1*H*-1,2,3-triazol-1-yl)-2-(1-vinylcycloheptyl)acetate, S11v**

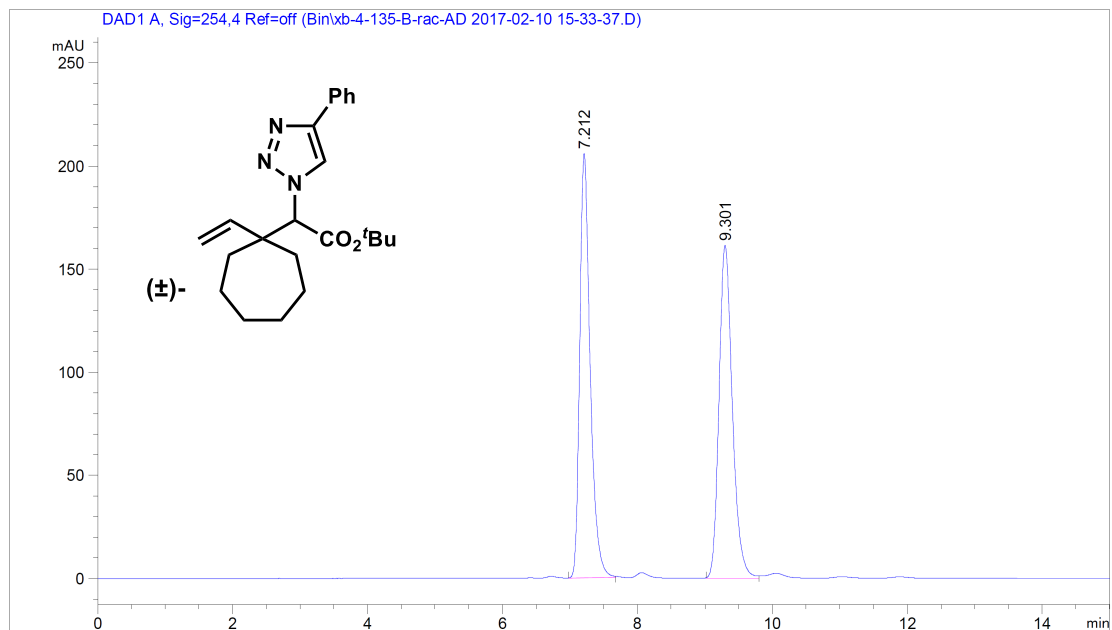

| Peak # | RetTime [min] | Type | Width [min] | Area [mAU*s] | Area %  | Name |
|--------|---------------|------|-------------|--------------|---------|------|
| 1      | 7.212         | BB   | 0.1612      | 2207.51318   | 49.8645 | ?    |
| 2      | 9.301         | BB   | 0.2104      | 2219.51123   | 50.1355 | ?    |

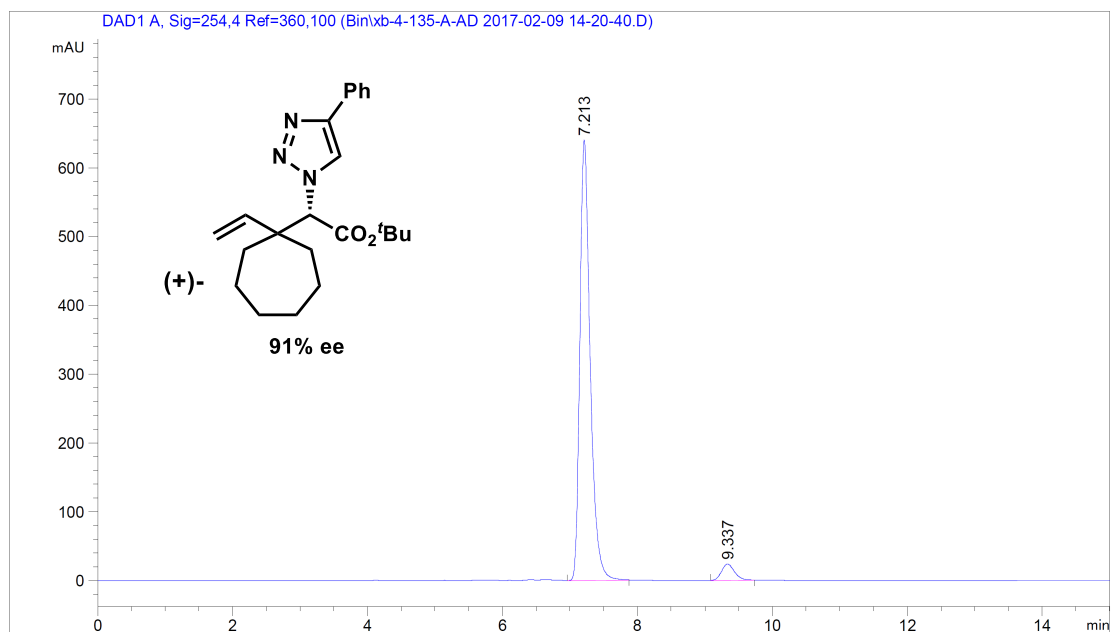

| Peak # | RetTime [min] | Type | Width [min] | Area [mAU*s] | Area %  | Name |
|--------|---------------|------|-------------|--------------|---------|------|
| 1      | 7.213         | VB   | 0.1612      | 6809.32959   | 95.5050 | ?    |
| 2      | 9.337         | BB   | 0.2076      | 320.48422    | 4.4950  | ?    |

**(+)-tert-Butyl (R)-2-iodo-2-(4-vinyltetrahydro-2H-pyran-4-yl)acetate, 5w**

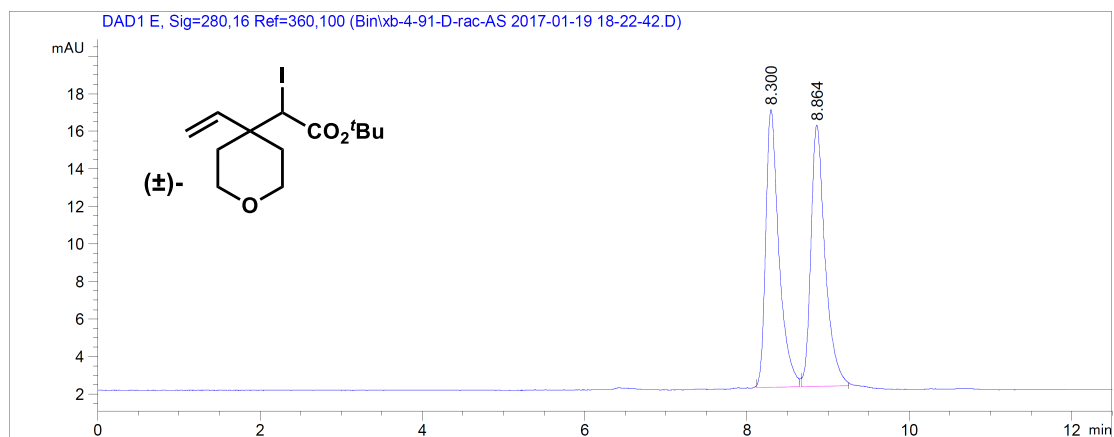

| Peak # | RetTime [min] | Type | Width [min] | Area [mAU*s] | Area %  | Name |
|--------|---------------|------|-------------|--------------|---------|------|
| 1      | 8.300         | BB   | 0.1669      | 167.51727    | 49.6578 | ?    |
| 2      | 8.864         | BB   | 0.1802      | 169.82574    | 50.3422 | ?    |

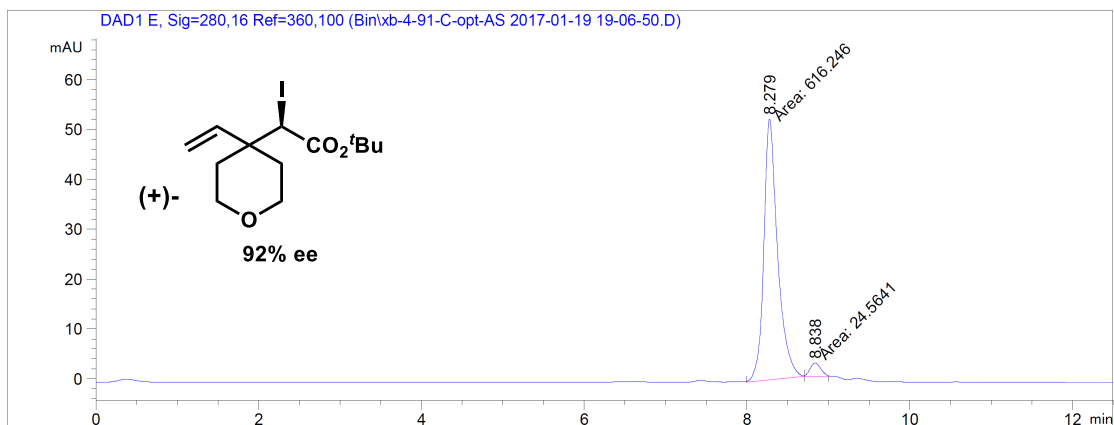

| Peak # | RetTime [min] | Type | Width [min] | Area [mAU*s] | Area %  | Name |
|--------|---------------|------|-------------|--------------|---------|------|
| 1      | 8.279         | MM   | 0.1964      | 616.24634    | 96.1667 | ?    |
| 2      | 8.838         | MM   | 0.1529      | 24.56411     | 3.8333  | ?    |

**(+)-tert-Butyl**

**(R)-4-(2-(tert-butoxy)-1-iodo-2-oxoethyl)-4-vinylpiperidine-1-carboxylate, 5x**

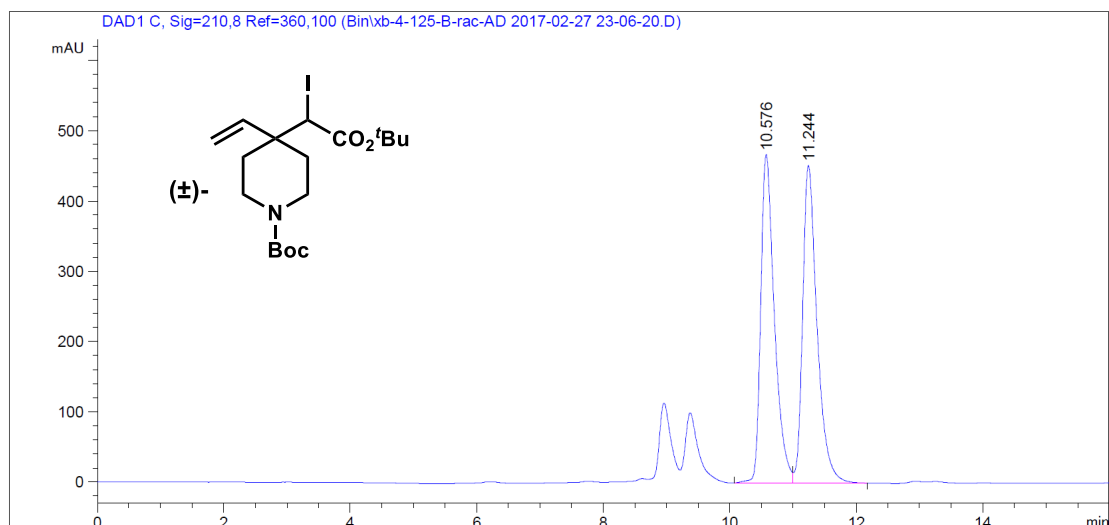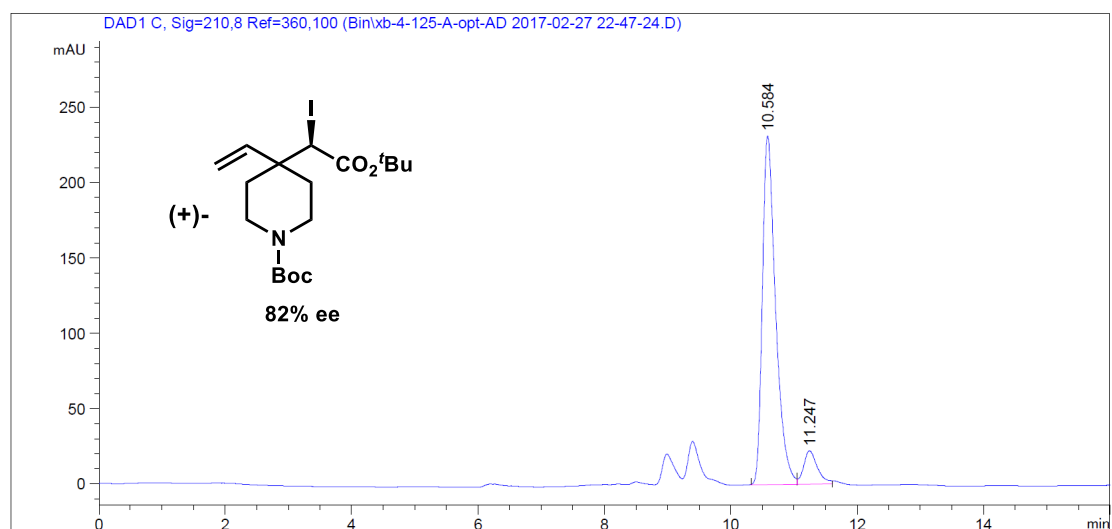

**(+)-*tert*-Butyl (2*R*)-2-((1*R*)-2-(hydroxymethyl)cyclohexyl)-2-iodoacetate, 6y**

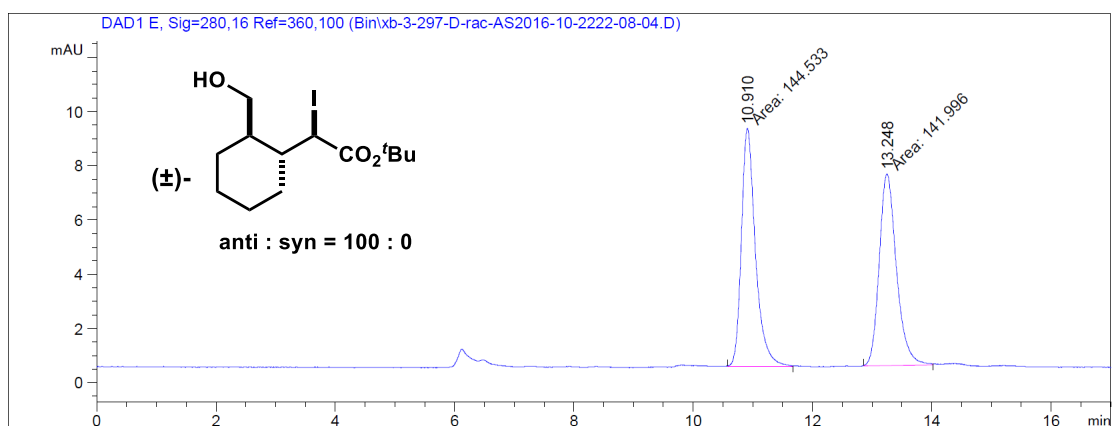

| Peak # | RetTime [min] | Type | Width [min] | Area [mAU*s] | Area %  |
|--------|---------------|------|-------------|--------------|---------|
| 1      | 10.910        | MM   | 0.2738      | 144.53304    | 50.4428 |
| 2      | 13.248        | MM   | 0.3346      | 141.99571    | 49.5572 |

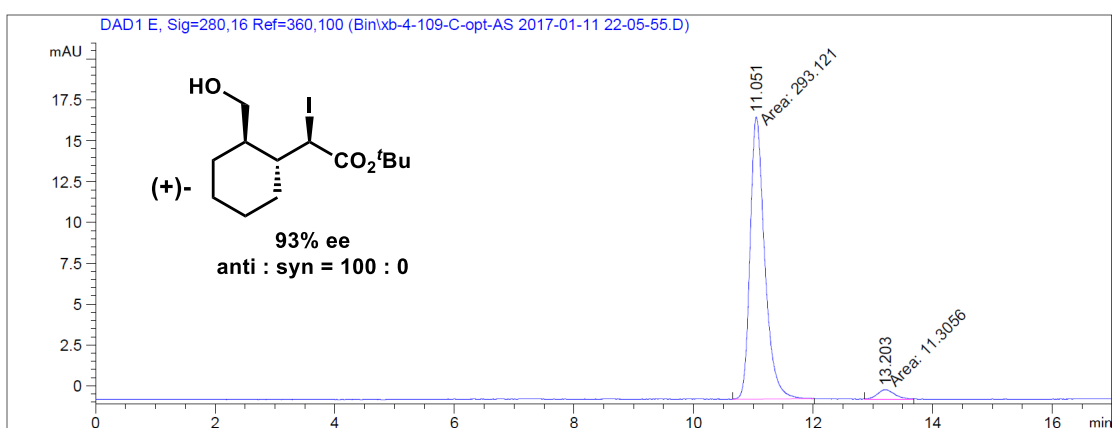

| Peak # | RetTime [min] | Type | Width [min] | Area [mAU*s] | Area %  |
|--------|---------------|------|-------------|--------------|---------|
| 1      | 11.051        | MM   | 0.2830      | 293.12079    | 96.2863 |
| 2      | 13.203        | MM   | 0.3300      | 11.30558     | 3.7137  |

**(-)-*tert*-Butyl (2*S*, 3*S*)-3-phenyl-2-(phenylthio)pent-4-enoate, 7a**

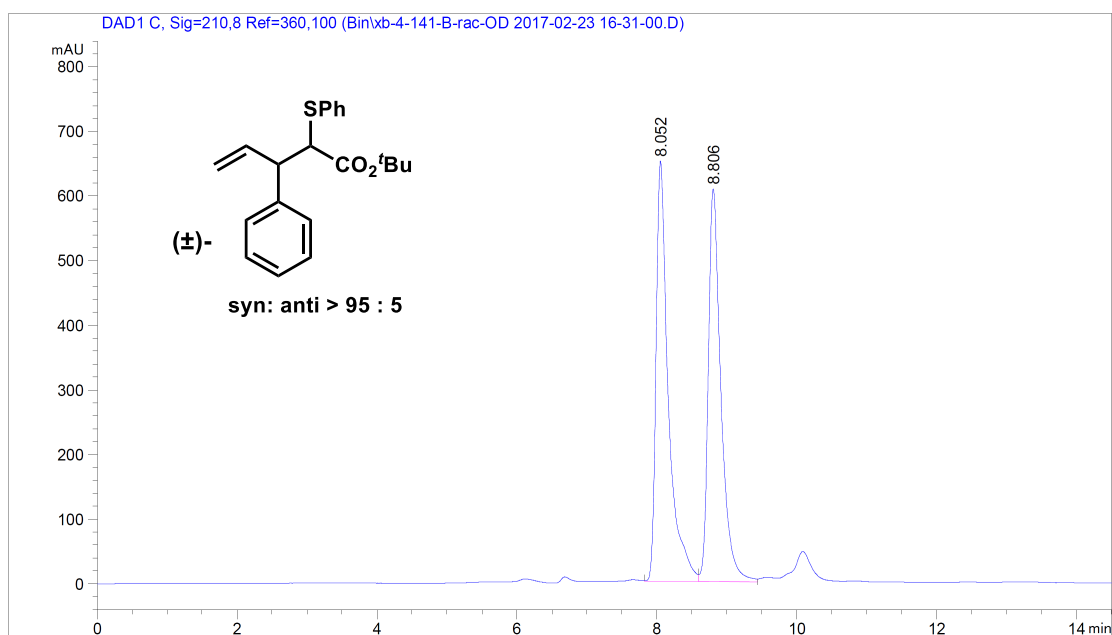

| Peak # | RetTime [min] | Type | Width [min] | Area [mAU*s] | Area %  | Name |
|--------|---------------|------|-------------|--------------|---------|------|
| 1      | 8.052         | VV   | 0.1774      | 7945.91992   | 50.9543 | ?    |
| 2      | 8.806         | VV   | 0.1869      | 7648.28760   | 49.0457 | ?    |

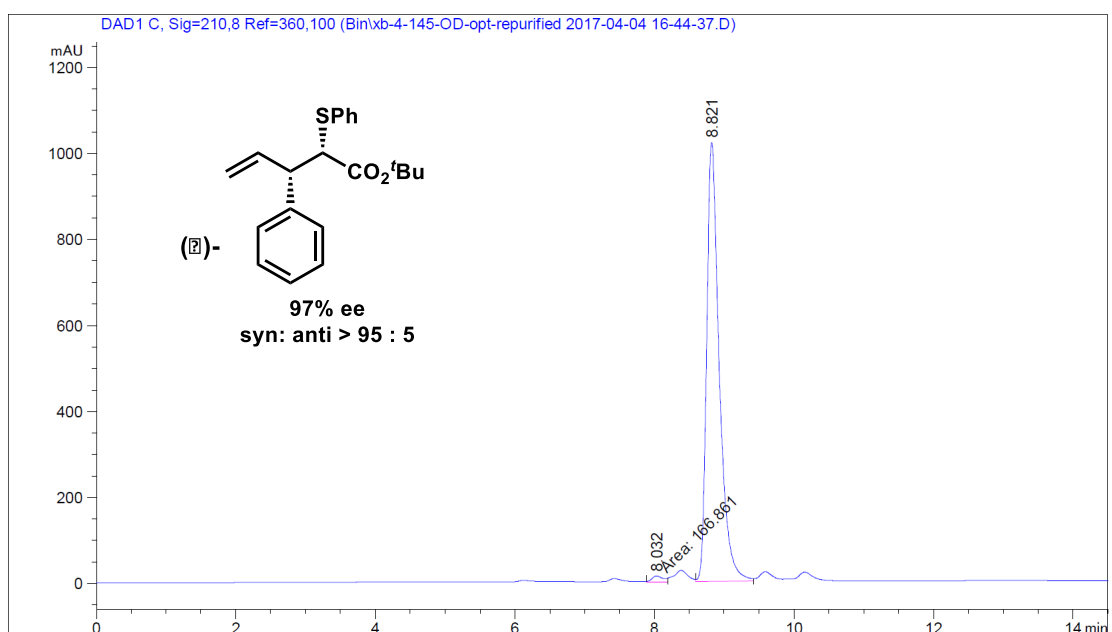

| Peak # | RetTime [min] | Type | Width [min] | Area [mAU*s] | Area %  | Name |
|--------|---------------|------|-------------|--------------|---------|------|
| 1      | 8.032         | MM   | 0.1915      | 166.86095    | 1.2900  | ?    |
| 2      | 8.821         | VV   | 0.1868      | 1.27678e4    | 98.7100 | ?    |

**(+)-*tert*-Butyl (2*R*, 3*R*)-2-(dicyanomethyl)-3-phenylpent-4-enoate, 9a**

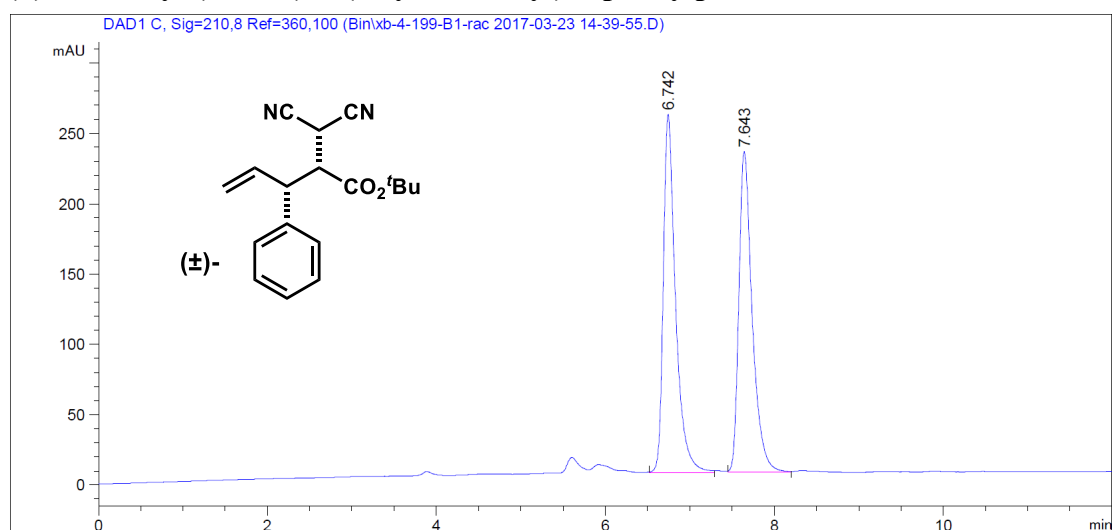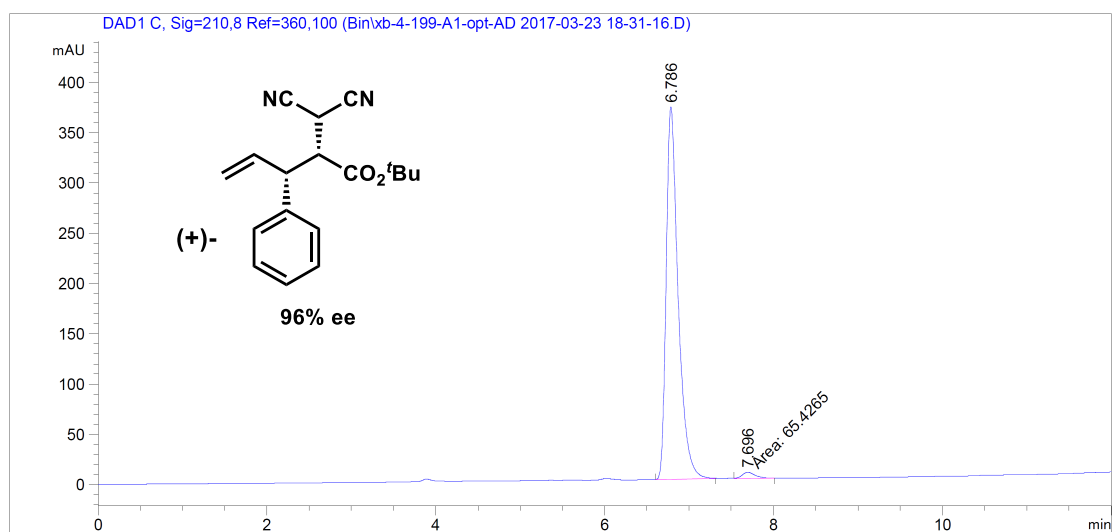

### (+)-*tert*-Butyl (*S*)-3-phenylpent-4-enoate, 10a

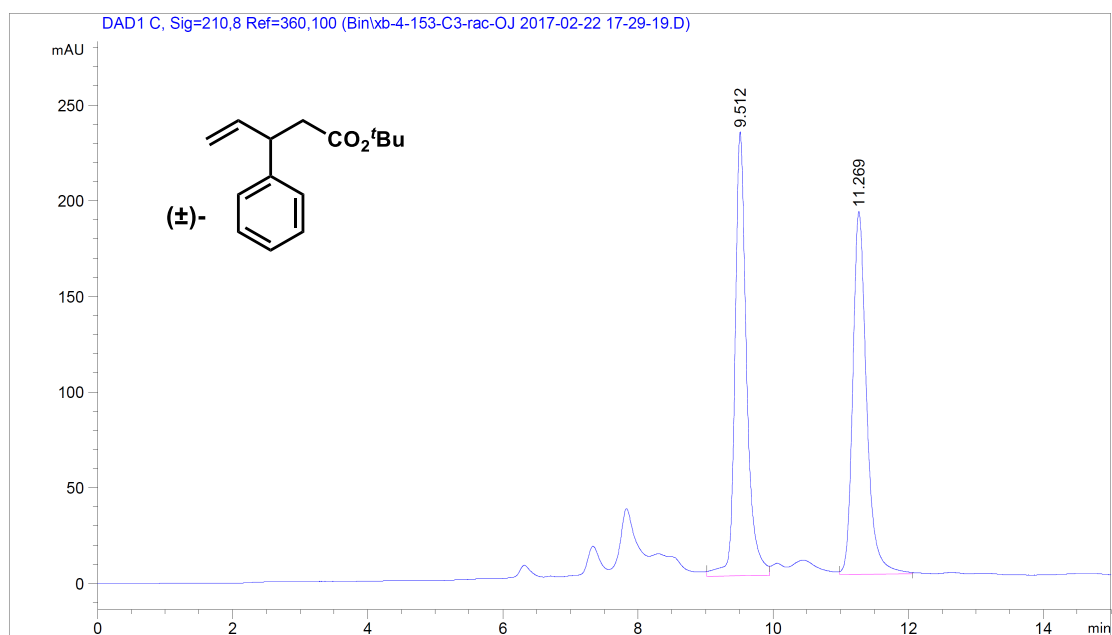

| Peak # | RetTime [min] | Type | Width [min] | Area [mAU*s] | Area %  | Name |
|--------|---------------|------|-------------|--------------|---------|------|
| 1      | 9.512         | BV   | 0.1774      | 2771.34204   | 50.7814 | ?    |
| 2      | 11.269        | BB   | 0.2132      | 2686.05420   | 49.2186 | ?    |

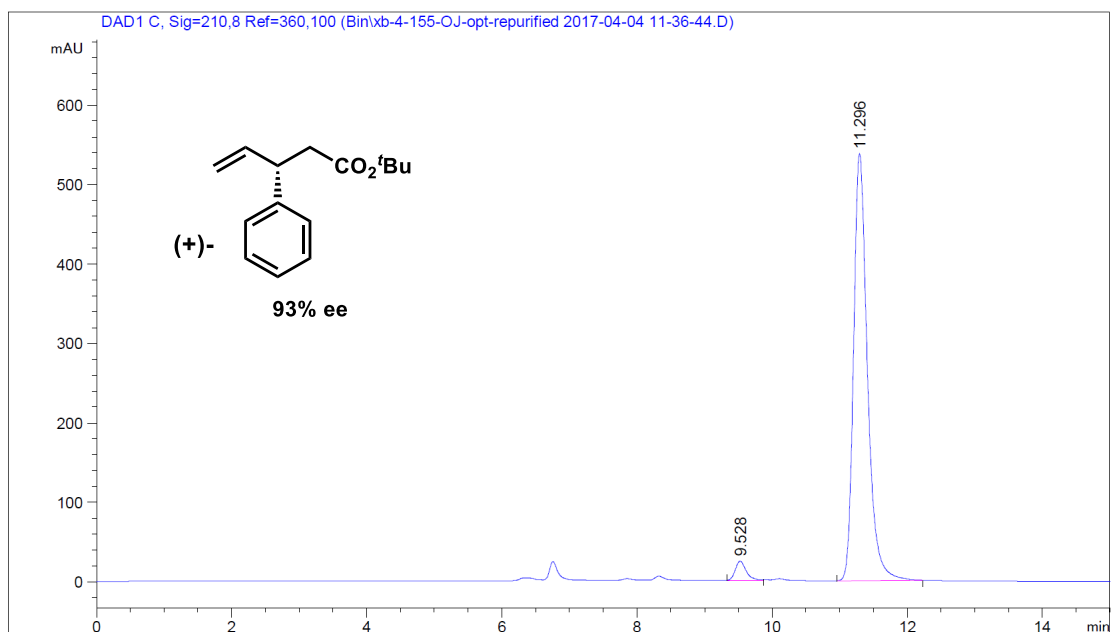

| Peak # | RetTime [min] | Type | Width [min] | Area [mAU*s] | Area %  | Name |
|--------|---------------|------|-------------|--------------|---------|------|
| 1      | 9.535         | BV   | 0.1733      | 319.20947    | 3.5842  | ?    |
| 2      | 11.298        | BB   | 0.2150      | 8586.81641   | 96.4158 | ?    |
